# Supplementary material for: An InDel Genomic Variant within a Bifunctional Super-Enhancer for LINC00636 and CD47 Regulation in Breast Cancer
Source: Research Square preprint supplement (doi:10.21203/rs.3.rs-9460487/v1), 2026-05-12
Supplement: Supplementary file 1 [file 426f7eeda567e8cd3eec51c4.xlsx]

## Sheet: DEGs
Table S3. DEGs upon LINC00636 overexpression in MCF7 cells, related to Figure 6.
gene_id	gene_name	transcript_id	Description	trans_type	FPKM.scr_1	FPKM.scr_2	FPKM.scr_3	FPKM.sgRNA1_1	FPKM.sgRNA1_2	FPKM.sgRNA1_3	FPKM.sgRNA2_1	FPKM.sgRNA2_2	FPKM.sgRNA2_3	pval	qval
ENSG00000099194	SCD	ENST00000370355	stearoyl-CoA desaturase [Source:HGNC Symbol;Acc:HGNC:10571]	protein_coding	253.851	257.368	240.099	166.879	161.905	171.793	148.964	143.106	144.378	8.53826e-139	3.25329e-135
ENSG00000171345	KRT19	ENST00000361566;ENST00000468880;ENST00000455635;ENST00000462611;ENST00000593096;ENST00000479031;ENST00000471565	keratin 19 [Source:HGNC Symbol;Acc:HGNC:6436]	protein_coding;retained_intron	1232.88	1189.81	1211.88	1134.5	1051.73	1096.46	1004.19	946.386	1037.74	6.39795e-92	1.62519e-88
ENSG00000196230	TUBB	ENST00000396384;ENST00000396389;ENST00000330914;ENST00000327892;ENST00000681435;ENST00000680530;ENST00000681421	tubulin beta class I [Source:HGNC Symbol;Acc:HGNC:20778]	protein_coding;retained_intron	426.653	422.525	426.034	388.71	367.284	382.338	331.882	330.84	320.157	5.80158e-72	8.03835e-69
ENSG00000125730	C3	ENST00000245907;ENST00000602229;ENST00000695651;ENST00000695689;ENST00000594936;ENST00000695690;ENST00000600744;ENST00000601475;ENST00000695653;ENST00000695652;ENST00000600763;ENST00000598805;ENST00000599899;ENST00000602053;ENST00000695692;ENST00000599668;ENST00000595577;ENST00000596238;ENST00000594005;ENST00000695655	complement C3 [Source:HGNC Symbol;Acc:HGNC:1318]	protein_coding;retained_intron;nonsense_mediated_decay;processed_transcript	3.09407	2.25995	2.74726	3.47286	3.38055	3.51104	5.84009	5.45046	5.66498	2.35979e-32	1.02759e-29
ENSG00000123416	TUBA1B	ENST00000336023;ENST00000547765;ENST00000332858;ENST00000551324;ENST00000547476;ENST00000552984	tubulin alpha 1b [Source:HGNC Symbol;Acc:HGNC:18809]	protein_coding;nonsense_mediated_decay;retained_intron	584.154	559.475	532.424	467.503	376.906	401.426	350.45	371.278	367.703	6.95671e-31	2.9452e-28
ENSG00000074800	ENO1	ENST00000645609;ENST00000486051;ENST00000234590;ENST00000464920;ENST00000492343;ENST00000497492;ENST00000646680;ENST00000646660;ENST00000645600;ENST00000646906;ENST00000414948;ENST00000643438;ENST00000489867;ENST00000646156	enolase 1 [Source:HGNC Symbol;Acc:HGNC:3350]	retained_intron;protein_coding;nonsense_mediated_decay;processed_transcript	518.077	519.909	521.5	515.764	486.396	493.18	468.082	459.215	457.782	1.15976e-30	4.77727e-28
ENSG00000168398	BDKRB2	ENST00000554311;ENST00000542454;ENST00000539359	bradykinin receptor B2 [Source:HGNC Symbol;Acc:HGNC:1030]	protein_coding	3.9133	3.6456	3.53357	5.07853	4.71856	4.79749	6.57397	6.43808	6.80759	1.11426e-29	4.2456e-27
ENSG00000111640	GAPDH	ENST00000396858;ENST00000229239;ENST00000474249;ENST00000396861;ENST00000396856;ENST00000466588;ENST00000466525;ENST00000396859;ENST00000619601;ENST00000496049;ENST00000492719	glyceraldehyde-3-phosphate dehydrogenase [Source:HGNC Symbol;Acc:HGNC:4141]	protein_coding;retained_intron	2513.42	2609.71	2526.36	2222.98	2142.66	2156.67	2133.59	2066.36	2085.63	5.84858e-25	1.81915e-22
ENSG00000198074	AKR1B10	ENST00000359579;ENST00000498818;ENST00000496435;ENST00000475559	aldo-keto reductase family 1 member B10 [Source:HGNC Symbol;Acc:HGNC:382]	protein_coding;processed_transcript	3.22791	3.27763	3.3169	6.1586	5.779	5.96967	10.4523	10.5155	9.36077	2.64501e-24	7.69579e-22
ENSG00000136048	DRAM1	ENST00000258534;ENST00000549365;ENST00000546729;ENST00000549066;ENST00000614926;ENST00000551403	DNA damage regulated autophagy modulator 1 [Source:HGNC Symbol;Acc:HGNC:25645]	protein_coding;nonsense_mediated_decay;retained_intron	8.41962	7.60975	8.59793	9.43598	9.60683	9.48262	13.2291	14.2277	13.5502	1.72481e-23	4.86812e-21
ENSG00000118503	TNFAIP3	ENST00000421450;ENST00000698329;ENST00000612899;ENST00000237289;ENST00000420009;ENST00000485192	TNF alpha induced protein 3 [Source:HGNC Symbol;Acc:HGNC:11896]	protein_coding;retained_intron	2.20144	2.46624	2.19779	2.98142	2.96408	2.85086	4.64775	4.95914	4.4812	1.06806e-22	2.58386e-20
ENSG00000143819	EPHX1	ENST00000448202;ENST00000272167;ENST00000614058;ENST00000467015;ENST00000366837	epoxide hydrolase 1 [Source:HGNC Symbol;Acc:HGNC:3401]	protein_coding;processed_transcript	30.0357	27.7996	27.4368	35.1847	35.2014	33.3682	43.9151	44.523	43.7524	2.57814e-22	6.13961e-20
ENSG00000160867	FGFR4	ENST00000393648;ENST00000292408;ENST00000502906;ENST00000393637;ENST00000510911;ENST00000511076;ENST00000430285;ENST00000514472;ENST00000507708;ENST00000483872;ENST00000426612;ENST00000508139;ENST00000513166;ENST00000503708;ENST00000513423;ENST00000509511	fibroblast growth factor receptor 4 [Source:HGNC Symbol;Acc:HGNC:3691]	protein_coding;nonsense_mediated_decay;processed_transcript;retained_intron	7.68571	6.91127	7.68491	5.88808	5.23064	4.96971	3.91085	3.82977	3.69761	5.22294e-22	1.22466e-19
ENSG00000198431	TXNRD1	ENST00000526950;ENST00000526691;ENST00000525566;ENST00000529546;ENST00000527688;ENST00000503506;ENST00000526390;ENST00000524698;ENST00000529784;ENST00000527335;ENST00000531691;ENST00000526207;ENST00000531689;ENST00000529751;ENST00000526580;ENST00000525265	thioredoxin reductase 1 [Source:HGNC Symbol;Acc:HGNC:12437]	protein_coding;nonsense_mediated_decay;retained_intron	63.0184	63.4799	59.3755	72.4729	73.2703	75.1528	82.768	87.2224	83.0918	1.8586e-21	3.9897e-19
ENSG00000196497	IPO4	ENST00000560798;ENST00000561199;ENST00000354464;ENST00000559588;ENST00000561462;ENST00000558780;ENST00000561090;ENST00000560222;ENST00000558193;ENST00000561034;ENST00000560315;ENST00000561379;ENST00000625289;ENST00000558718;ENST00000557996;ENST00000559635;ENST00000559253;ENST00000560935	importin 4 [Source:HGNC Symbol;Acc:HGNC:19426]	retained_intron;protein_coding;nonsense_mediated_decay	44.9223	43.515	45.7536	37.4905	41.2161	38.4156	28.5385	29.3318	27.5931	4.90488e-21	9.83623e-19
ENSG00000189091	SF3B3	ENST00000302516;ENST00000562722;ENST00000572365;ENST00000567635;ENST00000568291;ENST00000564899;ENST00000565990;ENST00000566095;ENST00000567250;ENST00000562874;ENST00000568539;ENST00000563739;ENST00000577085	splicing factor 3b subunit 3 [Source:HGNC Symbol;Acc:HGNC:10770]	protein_coding;retained_intron;nonsense_mediated_decay;processed_transcript	65.9036	60.3815	60.712	58.996	56.893	59.5089	46.1275	48.0104	47.783	1.21231e-19	2.14846e-17
ENSG00000171940	ZNF217	ENST00000302342;ENST00000371471;ENST00000437222;ENST00000540425;ENST00000431687	zinc finger protein 217 [Source:HGNC Symbol;Acc:HGNC:13009]	protein_coding;processed_transcript	176.287	165.873	161.237	173.786	177.638	179.935	198.674	204.783	194.813	2.79709e-19	4.68467e-17
ENSG00000090339	ICAM1	ENST00000264832;ENST00000592686;ENST00000423829	intercellular adhesion molecule 1 [Source:HGNC Symbol;Acc:HGNC:5344]	protein_coding;retained_intron	6.41405	5.22878	5.84883	7.09396	6.84192	7.4375	10.1335	10.7235	10.0817	3.0867e-19	5.11353e-17
ENSG00000188229	TUBB4B	ENST00000604929;ENST00000340384	tubulin beta 4B class IVb [Source:HGNC Symbol;Acc:HGNC:20771]	retained_intron;protein_coding	348.053	339.015	349.364	316.859	307.977	318.404	261.162	261.692	268.975	5.73267e-19	9.00739e-17
ENSG00000167165	UGT1A6	ENST00000373424;ENST00000305139;ENST00000441351;ENST00000480628;ENST00000446481;ENST00000406651;ENST00000478062	UDP glucuronosyltransferase family 1 member A6 [Source:HGNC Symbol;Acc:HGNC:12538]	protein_coding;processed_transcript;nonsense_mediated_decay	2.4745	1.94734	2.12256	2.81662	2.7865	3.12096	4.88385	5.11718	4.31631	9.30551e-19	1.40421e-16
ENSG00000095319	NUP188	ENST00000372577;ENST00000465344;ENST00000485158;ENST00000477069;ENST00000491502;ENST00000467044;ENST00000487952;ENST00000464729;ENST00000495726;ENST00000491990;ENST00000550219	nucleoporin 188 [Source:HGNC Symbol;Acc:HGNC:17859]	protein_coding;processed_transcript;retained_intron	21.8249	22.1193	22.1252	20.3899	20.5072	20.5573	15.2562	15.2143	15.1648	1.38128e-18	2.06393e-16
ENSG00000177606	JUN	ENST00000678696;ENST00000371222	Jun proto-oncogene, AP-1 transcription factor subunit [Source:HGNC Symbol;Acc:HGNC:6204]	nonsense_mediated_decay;protein_coding	17.3653	17.7306	16.7359	19.6397	19.5218	19.4882	25.211	24.7802	24.9411	2.21905e-17	2.90177e-15
ENSG00000122952	ZWINT	ENST00000395405;ENST00000318387;ENST00000373944;ENST00000361148;ENST00000489649;ENST00000494312;ENST00000478181;ENST00000460654	ZW10 interacting kinetochore protein [Source:HGNC Symbol;Acc:HGNC:13195]	protein_coding;nonsense_mediated_decay;retained_intron;processed_transcript	22.0375	22.6795	23.6211	20.4281	20.9782	20.3473	15.0062	15.1404	15.1554	2.27924e-16	2.73527e-14
ENSG00000114796	KLHL24	ENST00000454652;ENST00000242810;ENST00000454495;ENST00000481126;ENST00000493074;ENST00000427201;ENST00000437402;ENST00000468101;ENST00000473045;ENST00000476808;ENST00000492409;ENST00000468001;ENST00000461813;ENST00000482138	kelch like family member 24 [Source:HGNC Symbol;Acc:HGNC:25947]	protein_coding;retained_intron;processed_transcript	2.1529	2.14552	2.03164	2.48978	2.81119	2.64209	3.73142	3.84569	3.29594	2.0911e-15	2.29284e-13
ENSG00000048392	RRM2B	ENST00000522368;ENST00000251810;ENST00000519125;ENST00000523957;ENST00000395912;ENST00000517517;ENST00000395910	ribonucleotide reductase regulatory TP53 inducible subunit M2B [Source:HGNC Symbol;Acc:HGNC:17296]	protein_coding;retained_intron;nonsense_mediated_decay	19.585	19.1782	18.7026	20.942	23.9936	21.7714	27.6094	29.5489	26.3362	3.43735e-15	3.58826e-13
ENSG00000100297	MCM5	ENST00000216122;ENST00000493076;ENST00000382011;ENST00000451351;ENST00000417343;ENST00000416905	minichromosome maintenance complex component 5 [Source:HGNC Symbol;Acc:HGNC:6948]	protein_coding;retained_intron;nonsense_mediated_decay;processed_transcript	11.5025	11.5194	11.5089	10.0787	9.7388	10.2813	7.44762	7.68163	8.08157	5.40658e-15	5.49344e-13
ENSG00000099341	PSMD8	ENST00000700293;ENST00000592001;ENST00000700294;ENST00000700297;ENST00000591216;ENST00000215071;ENST00000602911;ENST00000592035;ENST00000591250;ENST00000592561;ENST00000700295;ENST00000700296	proteasome 26S subunit, non-ATPase 8 [Source:HGNC Symbol;Acc:HGNC:9566]	protein_coding;retained_intron;processed_transcript	41.9285	41.49	39.1371	38.2874	36.1487	37.5609	27.1633	27.7304	29.9277	7.41272e-15	7.24214e-13
ENSG00000073111	MCM2	ENST00000491422;ENST00000474964;ENST00000265056;ENST00000468414;ENST00000480910;ENST00000473785;ENST00000468659;ENST00000472731	minichromosome maintenance complex component 2 [Source:HGNC Symbol;Acc:HGNC:6944]	protein_coding;nonsense_mediated_decay;processed_transcript;retained_intron	44.017	46.302	45.4575	40.4171	39.4504	40.9452	31.3994	31.3763	32.5758	1.55887e-14	1.4487e-12
ENSG00000124151	NCOA3	ENST00000371997;ENST00000372004;ENST00000371998;ENST00000497292;ENST00000490248	nuclear receptor coactivator 3 [Source:HGNC Symbol;Acc:HGNC:7670]	protein_coding;processed_transcript	171.972	167.509	162.496	176.513	174.393	180.171	187.753	191.008	178.572	2.71412e-14	2.41906e-12
ENSG00000131153	GINS2	ENST00000253462;ENST00000596233;ENST00000595355	GINS complex subunit 2 [Source:HGNC Symbol;Acc:HGNC:24575]	protein_coding	13.4477	12.6653	12.5655	10.9903	11.8859	11.136	8.76419	8.23732	8.62784	9.48326e-14	8.11991e-12
ENSG00000161011	SQSTM1	ENST00000481335;ENST00000360718;ENST00000506690;ENST00000389805;ENST00000512234;ENST00000514093;ENST00000466342;ENST00000422245;ENST00000506042;ENST00000453046;ENST00000504627;ENST00000464493;ENST00000508284;ENST00000626660;ENST00000485412	sequestosome 1 [Source:HGNC Symbol;Acc:HGNC:11280]	processed_transcript;protein_coding;retained_intron;nonsense_mediated_decay	78.4608	74.9938	79.8976	89.3987	82.3503	85.9831	99.6401	94.9763	96.6203	1.00132e-13	8.47838e-12
ENSG00000169242	EFNA1	ENST00000469878;ENST00000474413;ENST00000368407;ENST00000368406;ENST00000497282	ephrin A1 [Source:HGNC Symbol;Acc:HGNC:3221]	processed_transcript;protein_coding	20.1314	20.3695	20.8255	23.3393	23.2076	23.802	29.9633	28.8641	28.9413	1.74643e-13	1.46249e-11
ENSG00000147872	PLIN2	ENST00000276914;ENST00000475923;ENST00000380465;ENST00000380464;ENST00000434144;ENST00000464326;ENST00000472715;ENST00000494753	perilipin 2 [Source:HGNC Symbol;Acc:HGNC:248]	protein_coding;processed_transcript	4.54284	4.35061	4.25987	5.10646	5.5179	5.70331	6.89964	7.2486	6.3121	1.80985e-13	1.50732e-11
ENSG00000159403	C1R	ENST00000540394;ENST00000647956;ENST00000545466;ENST00000540242;ENST00000536053;ENST00000649804;ENST00000536092;ENST00000540610;ENST00000648162;ENST00000535233;ENST00000543851;ENST00000602298	complement C1r [Source:HGNC Symbol;Acc:HGNC:1246]	retained_intron;protein_coding;processed_transcript	2.7938	3.07881	2.9361	3.40416	3.64311	3.78237	5.0157	4.64405	5.21758	4.80673e-13	3.91761e-11
ENSG00000030582	GRN	ENST00000592783;ENST00000587109;ENST00000586443;ENST00000053867;ENST00000586242;ENST00000590984;ENST00000588143;ENST00000587958;ENST00000585348;ENST00000585512;ENST00000587387;ENST00000592323;ENST00000589536;ENST00000593167;ENST00000591740;ENST00000588170;ENST00000589923	granulin precursor [Source:HGNC Symbol;Acc:HGNC:4601]	protein_coding;retained_intron;processed_transcript	116.043	108.86	109.334	121.672	117.63	117.311	142.455	137.617	141.531	6.87477e-13	5.40094e-11
ENSG00000167553	TUBA1C	ENST00000548470;ENST00000301072;ENST00000549183;ENST00000541364;ENST00000549554;ENST00000550574	tubulin alpha 1c [Source:HGNC Symbol;Acc:HGNC:20768]	retained_intron;protein_coding;processed_transcript	188.78	178.685	173.513	160.992	155.067	161.792	139.361	143.757	147.8	8.78467e-13	6.83097e-11
ENSG00000186591	UBE2H	ENST00000355621;ENST00000496698;ENST00000490974;ENST00000472396;ENST00000480245;ENST00000483368;ENST00000463272;ENST00000486283;ENST00000473814	ubiquitin conjugating enzyme E2 H [Source:HGNC Symbol;Acc:HGNC:12484]	protein_coding;nonsense_mediated_decay;retained_intron	27.1264	25.7452	27.1033	28.4187	30.6074	30.2993	36.4151	37.5682	34.9642	1.6507e-12	1.23932e-10
ENSG00000130487	KLHDC7B	ENST00000648057;ENST00000395676;ENST00000434237	kelch domain containing 7B [Source:HGNC Symbol;Acc:HGNC:25145]	protein_coding;processed_transcript	2.46167	2.22565	2.5374	3.65464	2.68493	3.42917	4.90481	4.31563	4.95442	5.56281e-12	3.81904e-10
ENSG00000130164	LDLR	ENST00000558518;ENST00000558013;ENST00000557933;ENST00000560467;ENST00000560502;ENST00000252444;ENST00000545707;ENST00000560628;ENST00000559340;ENST00000558528;ENST00000535915;ENST00000557958;ENST00000455727;ENST00000560173	low density lipoprotein receptor [Source:HGNC Symbol;Acc:HGNC:6547]	protein_coding;retained_intron;processed_transcript;nonsense_mediated_decay	14.1195	13.8443	12.7787	11.7566	11.3437	11.3168	9.71934	9.19723	9.82279	8.53798e-12	5.80925e-10
ENSG00000100219	XBP1	ENST00000405219;ENST00000403532;ENST00000216037;ENST00000344347;ENST00000484256;ENST00000482720	X-box binding protein 1 [Source:HGNC Symbol;Acc:HGNC:12801]	protein_coding;retained_intron	428.343	387.156	373.909	373.055	352.844	365.307	306.71	317.665	332.36	1.36358e-11	8.95787e-10
ENSG00000272398	CD24	ENST00000622315;ENST00000606017;ENST00000619133;ENST00000621311;ENST00000620405;ENST00000619869;ENST00000615659;ENST00000610952	CD24 molecule [Source:HGNC Symbol;Acc:HGNC:1645]	protein_coding;processed_transcript	368.342	357.677	359.725	368.603	395.865	389.559	406.485	416.534	403.094	1.88546e-11	1.20236e-09
ENSG00000128973	CLN6	ENST00000564752;ENST00000249806;ENST00000637667;ENST00000636964;ENST00000638076;ENST00000563917;ENST00000636212;ENST00000567060;ENST00000564846;ENST00000635747;ENST00000635754;ENST00000636674;ENST00000636020;ENST00000566347;ENST00000638144;ENST00000538696;ENST00000637494;ENST00000565471;ENST00000569336;ENST00000636876	CLN6 transmembrane ER protein [Source:HGNC Symbol;Acc:HGNC:2077]	protein_coding;retained_intron;nonsense_mediated_decay;processed_transcript	6.98444	7.64971	7.90145	6.40379	6.38284	6.6919	5.45572	4.7803	4.91292	1.93513e-11	1.22889e-09
ENSG00000084731	KIF3C	ENST00000264712;ENST00000405914;ENST00000496378;ENST00000475453;ENST00000455394;ENST00000488341	kinesin family member 3C [Source:HGNC Symbol;Acc:HGNC:6321]	protein_coding;processed_transcript;retained_intron;nonsense_mediated_decay	5.73685	5.0948	5.34531	6.75565	5.90323	6.5685	7.99896	7.46981	7.90688	2.29647e-11	1.44035e-09
ENSG00000112514	CUTA	ENST00000465956;ENST00000462802;ENST00000440279;ENST00000487637;ENST00000482684;ENST00000488478;ENST00000607266;ENST00000488034;ENST00000374500;ENST00000492510;ENST00000479249;ENST00000494751;ENST00000374484;ENST00000374496	cutA divalent cation tolerance homolog [Source:HGNC Symbol;Acc:HGNC:21101]	retained_intron;protein_coding;nonsense_mediated_decay	31.8875	37.1356	31.6836	49.8147	48.8459	47.6277	41.9285	37.1169	40.0638	2.63549e-11	1.62621e-09
ENSG00000123240	OPTN	ENST00000378752;ENST00000378748;ENST00000378747;ENST00000378757;ENST00000486862;ENST00000482140;ENST00000263036;ENST00000424614;ENST00000487935;ENST00000469025;ENST00000430081	optineurin [Source:HGNC Symbol;Acc:HGNC:17142]	protein_coding;nonsense_mediated_decay;processed_transcript	11.3747	11.8308	11.1638	13.2285	12.6284	12.3106	15.6829	15.9345	14.9809	3.34747e-11	2.04895e-09
ENSG00000206337	HCP5	ENST00000414046;ENST00000666495;ENST00000670109;ENST00000674016	HLA complex P5 [Source:HGNC Symbol;Acc:HGNC:21659]	lncRNA	2.72434	2.84044	2.56094	3.44454	3.34982	3.25954	3.70181	3.75068	3.86775	3.49347e-11	2.12976e-09
ENSG00000143416	SELENBP1	ENST00000447402;ENST00000368868;ENST00000470345;ENST00000463664;ENST00000493560;ENST00000426705;ENST00000498494;ENST00000474352;ENST00000443708;ENST00000458566;ENST00000465273;ENST00000423070;ENST00000455839;ENST00000427867;ENST00000492643;ENST00000424475;ENST00000473693	selenium binding protein 1 [Source:HGNC Symbol;Acc:HGNC:10719]	protein_coding;retained_intron;processed_transcript;nonsense_mediated_decay	42.5436	41.3721	41.6334	34.1577	32.0478	33.2011	30.9919	29.3667	32.6962	3.63349e-11	2.19754e-09
ENSG00000155090	KLF10	ENST00000285407;ENST00000395884	Kruppel like factor 10 [Source:HGNC Symbol;Acc:HGNC:11810]	protein_coding	27.9783	24.9044	25.3639	28.9358	27.3483	29.6517	34.7572	35.4796	33.6428	3.67417e-11	2.20818e-09
ENSG00000183856	IQGAP3	ENST00000361170;ENST00000476565;ENST00000491900;ENST00000498755	IQ motif containing GTPase activating protein 3 [Source:HGNC Symbol;Acc:HGNC:20669]	protein_coding;processed_transcript;nonsense_mediated_decay	8.25995	8.72729	8.37563	8.07369	7.58932	7.45746	5.96102	5.72684	5.90113	5.46601e-11	3.2165e-09
ENSG00000116299	ELAPOR1	ENST00000369936;ENST00000369939;ENST00000457623;ENST00000527996;ENST00000529753;ENST00000490758;ENST00000464345;ENST00000527501;ENST00000531664;ENST00000533147;ENST00000526264;ENST00000369938;ENST00000533374	endosome-lysosome associated apoptosis and autophagy regulator 1 [Source:HGNC Symbol;Acc:HGNC:29618]	retained_intron;protein_coding;nonsense_mediated_decay;processed_transcript	80.7344	75.4399	75.5655	71.1238	68.776	73.7864	62.5666	63.5068	59.886	7.37761e-11	4.18001e-09
ENSG00000196139	AKR1C3	ENST00000380554;ENST00000603312;ENST00000605149;ENST00000603484;ENST00000605322;ENST00000480697	aldo-keto reductase family 1 member C3 [Source:HGNC Symbol;Acc:HGNC:386]	protein_coding;retained_intron	5.26539	6.15707	5.72108	7.90163	7.32343	7.48408	8.60927	8.55943	8.0667	8.06844e-11	4.53768e-09
ENSG00000117983	MUC5B	ENST00000529681;ENST00000525715;ENST00000531082;ENST00000527802	mucin 5B, oligomeric mucus/gel-forming [Source:HGNC Symbol;Acc:HGNC:7516]	protein_coding;retained_intron;processed_transcript	4.42734	4.29871	4.53961	3.41106	3.13579	3.51053	3.07148	3.05398	3.35573	9.13023e-11	5.06014e-09
ENSG00000186480	INSIG1	ENST00000340368;ENST00000476756;ENST00000425172;ENST00000342407;ENST00000468307;ENST00000344756	insulin induced gene 1 [Source:HGNC Symbol;Acc:HGNC:6083]	protein_coding;retained_intron	34.3138	31.3008	31.4383	29.3851	27.9114	28.4712	24.0705	24.2009	23.6549	9.2151e-11	5.08867e-09
ENSG00000109790	KLHL5	ENST00000261425;ENST00000504108;ENST00000381930;ENST00000508137;ENST00000515612;ENST00000514399	kelch like family member 5 [Source:HGNC Symbol;Acc:HGNC:6356]	protein_coding;nonsense_mediated_decay	2.96859	2.77261	2.71019	2.9738	3.39501	3.53674	4.00541	4.48522	4.11284	1.28171e-10	6.92712e-09
ENSG00000087086	FTL	ENST00000331825	ferritin light chain [Source:HGNC Symbol;Acc:HGNC:3999]	protein_coding	621.432	637.096	673.348	740.213	729.181	703.586	801.041	781.96	775.63	1.32556e-10	7.13882e-09
ENSG00000172893	DHCR7	ENST00000682708;ENST00000525346;ENST00000690257;ENST00000683287;ENST00000683714;ENST00000684396;ENST00000525137;ENST00000355527;ENST00000682880;ENST00000407721;ENST00000526780;ENST00000683874;ENST00000534795;ENST00000529990;ENST00000531364;ENST00000527316;ENST00000533800;ENST00000534701	7-dehydrocholesterol reductase [Source:HGNC Symbol;Acc:HGNC:2860]	protein_coding;retained_intron	36.3441	36.9435	35.1403	34.2429	31.4112	34.1821	26.4808	25.0898	27.6614	1.4209e-10	7.5042e-09
ENSG00000176953	NFATC2IP	ENST00000568148;ENST00000320805;ENST00000568998;ENST00000565919;ENST00000564978;ENST00000562977;ENST00000565752	nuclear factor of activated T cells 2 interacting protein [Source:HGNC Symbol;Acc:HGNC:25906]	protein_coding;retained_intron;processed_transcript	10.0066	9.98042	9.98963	9.52945	9.37006	9.01395	7.18036	7.24995	6.78504	1.46011e-10	7.67366e-09
ENSG00000169710	FASN	ENST00000306749;ENST00000580382;ENST00000634990;ENST00000584610;ENST00000635197;ENST00000637026;ENST00000637525;ENST00000578424;ENST00000637693;ENST00000635733;ENST00000579410;ENST00000636968;ENST00000636628	fatty acid synthase [Source:HGNC Symbol;Acc:HGNC:3594]	protein_coding;nonsense_mediated_decay;retained_intron;processed_transcript	89.0341	76.4685	84.6331	81.3258	72.885	75.7565	66.9601	59.7857	62.7282	1.95791e-10	1.00136e-08
ENSG00000168280	KIF5C	ENST00000677843;ENST00000679156;ENST00000435030;ENST00000677862;ENST00000677705;ENST00000678133;ENST00000678184;ENST00000678636;ENST00000482151;ENST00000677773;ENST00000679018;ENST00000676875;ENST00000678363;ENST00000679236;ENST00000677563;ENST00000676677;ENST00000677465;ENST00000460377;ENST00000676503;ENST00000678291;ENST00000676852;ENST00000678891	kinesin family member 5C [Source:HGNC Symbol;Acc:HGNC:6325]	protein_coding;retained_intron;processed_transcript;nonsense_mediated_decay	1.79376	1.79976	1.85699	2.24509	2.16442	2.20179	2.43764	2.42353	2.38421	2.51006e-10	1.27096e-08
ENSG00000076248	UNG	ENST00000699562;ENST00000699565;ENST00000699561;ENST00000242576;ENST00000336865;ENST00000699564;ENST00000446767;ENST00000699566;ENST00000699563;ENST00000539287;ENST00000699560;ENST00000540158	uracil DNA glycosylase [Source:HGNC Symbol;Acc:HGNC:12572]	protein_coding;nonsense_mediated_decay;retained_intron	22.9593	24.3234	24.2712	22.1394	21.3574	21.9452	17.5753	18.4039	17.4745	2.88217e-10	1.42159e-08
ENSG00000122884	P4HA1	ENST00000440381;ENST00000394890;ENST00000263556;ENST00000464310	prolyl 4-hydroxylase subunit alpha 1 [Source:HGNC Symbol;Acc:HGNC:8546]	protein_coding;retained_intron	45.1793	45.4154	44.0078	49.6024	48.5864	48.404	58.8782	58.7914	55.9192	2.9146e-10	1.43295e-08
ENSG00000237649	KIFC1	ENST00000428849;ENST00000494554;ENST00000450504;ENST00000486695	kinesin family member C1 [Source:HGNC Symbol;Acc:HGNC:6389]	protein_coding;retained_intron	24.2094	24.8942	24.7675	22.1812	21.3312	21.521	17.8009	16.4993	18.2446	3.44871e-10	1.67929e-08
ENSG00000234745	HLA-B	ENST00000696558;ENST00000463574;ENST00000497377;ENST00000474381;ENST00000696560;ENST00000481849;ENST00000640094;ENST00000434333;ENST00000498007	major histocompatibility complex, class I, B [Source:HGNC Symbol;Acc:HGNC:4932]	nonsense_mediated_decay;retained_intron;protein_coding	42.145	40.1306	42.0764	51.4924	49.8787	49.0702	52.1816	54.0362	55.2531	3.83757e-10	1.8509e-08
ENSG00000054690	PLEKHH1	ENST00000329153;ENST00000557971;ENST00000558386;ENST00000559981;ENST00000558296;ENST00000561135;ENST00000559766;ENST00000561370;ENST00000558981;ENST00000561456;ENST00000558366;ENST00000561057;ENST00000558214;ENST00000560100	pleckstrin homology, MyTH4 and FERM domain containing H1 [Source:HGNC Symbol;Acc:HGNC:17733]	protein_coding;retained_intron;nonsense_mediated_decay	3.03817	3.21179	3.00939	2.82809	2.92069	2.75343	2.25745	2.02877	2.11075	3.91505e-10	1.88231e-08
ENSG00000073150	PANX2	ENST00000402472;ENST00000395842;ENST00000159647	pannexin 2 [Source:HGNC Symbol;Acc:HGNC:8600]	nonsense_mediated_decay;protein_coding	4.27837	4.65576	4.73626	6.01092	5.36426	5.76765	8.43784	7.82827	6.98337	4.77757e-10	2.26133e-08
ENSG00000243649	CFB	ENST00000698631;ENST00000698630;ENST00000698628;ENST00000425368;ENST00000698632;ENST00000698633;ENST00000497841;ENST00000472581;ENST00000482886;ENST00000483004;ENST00000698629;ENST00000698636;ENST00000482312;ENST00000475617;ENST00000461483;ENST00000452035;ENST00000467360;ENST00000465750;ENST00000498317;ENST00000467150	complement factor B [Source:HGNC Symbol;Acc:HGNC:1037]	retained_intron;protein_coding;non_stop_decay;processed_transcript	21.1568	21.5952	21.1057	24.6093	23.1192	24.917	26.0302	26.4347	27.1055	5.46704e-10	2.56379e-08
ENSG00000138061	CYP1B1	ENST00000610745;ENST00000614273;ENST00000491456;ENST00000492443;ENST00000613082	cytochrome P450 family 1 subfamily B member 1 [Source:HGNC Symbol;Acc:HGNC:2597]	protein_coding;processed_transcript	17.9776	16.9699	16.9731	22.1875	22.4198	22.029	20.6452	20.2844	19.5177	6.73478e-10	3.10105e-08
ENSG00000144824	PHLDB2	ENST00000393925;ENST00000498699;ENST00000431670;ENST00000481953;ENST00000412622;ENST00000393923;ENST00000640905;ENST00000640181;ENST00000486886;ENST00000478584;ENST00000477695;ENST00000460365;ENST00000478733;ENST00000638331;ENST00000470699;ENST00000478922;ENST00000491694	pleckstrin homology like domain family B member 2 [Source:HGNC Symbol;Acc:HGNC:29573]	protein_coding;processed_transcript;retained_intron	2.32704	2.19879	2.04086	2.49215	2.5995	3.00746	2.99772	3.34639	3.33436	9.02756e-10	4.05867e-08
ENSG00000027697	IFNGR1	ENST00000367739;ENST00000414770;ENST00000696695;ENST00000696696;ENST00000478333;ENST00000458076;ENST00000647124;ENST00000645753;ENST00000644894;ENST00000646898	interferon gamma receptor 1 [Source:HGNC Symbol;Acc:HGNC:5439]	protein_coding;nonsense_mediated_decay;retained_intron	9.00743	9.26176	7.7369	10.4166	10.355	8.88479	12.4219	12.4959	12.7527	1.02324e-09	4.54669e-08
ENSG00000135048	CEMIP2	ENST00000377044;ENST00000377066;ENST00000537329;ENST00000542935;ENST00000377055;ENST00000538669;ENST00000474495;ENST00000543165;ENST00000546219;ENST00000396272;ENST00000377057;ENST00000377043	cell migration inducing hyaluronidase 2 [Source:HGNC Symbol;Acc:HGNC:11869]	protein_coding;retained_intron;nonsense_mediated_decay	10.1724	10.2985	10.4047	11.092	10.9391	11.2243	12.8507	13.1203	12.9408	1.13788e-09	5.01225e-08
ENSG00000141959	PFKL	ENST00000466134;ENST00000397961;ENST00000349048;ENST00000474114;ENST00000460020;ENST00000496824;ENST00000467315;ENST00000460521;ENST00000491298;ENST00000495274;ENST00000628044;ENST00000498841	phosphofructokinase, liver type [Source:HGNC Symbol;Acc:HGNC:8876]	retained_intron;nonsense_mediated_decay;protein_coding;processed_transcript	49.9452	49.2398	51.201	47.5402	45.9082	45.9913	40.472	38.3721	39.5576	1.33199e-09	5.78373e-08
ENSG00000067225	PKM	ENST00000561609;ENST00000698740;ENST00000568459;ENST00000389093;ENST00000319622;ENST00000565184;ENST00000569857;ENST00000698741;ENST00000564440;ENST00000567118;ENST00000335181;ENST00000563986;ENST00000564993;ENST00000565154;ENST00000565143;ENST00000567087;ENST00000564276;ENST00000569050;ENST00000563275;ENST00000566809;ENST00000564178;ENST00000562997;ENST00000568743;ENST00000570166;ENST00000562784	pyruvate kinase M1/2 [Source:HGNC Symbol;Acc:HGNC:9021]	protein_coding;nonsense_mediated_decay;retained_intron	273	273.475	274.967	261.748	247.316	251.431	261.54	251.85	246.407	1.58485e-09	6.72834e-08
ENSG00000213918	DNASE1	ENST00000407479;ENST00000571460;ENST00000570761;ENST00000570769;ENST00000570520;ENST00000570807;ENST00000573804;ENST00000570664;ENST00000246949;ENST00000575479;ENST00000576792;ENST00000570376;ENST00000576050;ENST00000572237	deoxyribonuclease 1 [Source:HGNC Symbol;Acc:HGNC:2956]	protein_coding;nonsense_mediated_decay;processed_transcript;retained_intron	2.16145	2.21411	2.21164	2.40705	2.39934	2.42003	2.95536	2.92374	3.28871	1.73243e-09	7.27382e-08
ENSG00000197746	PSAP	ENST00000394936;ENST00000493143;ENST00000495196;ENST00000633965	prosaposin [Source:HGNC Symbol;Acc:HGNC:9498]	protein_coding;retained_intron	254.215	248.183	246.968	268.168	266.15	269.892	284.247	287.061	275.488	1.7718e-09	7.41867e-08
ENSG00000146918	NCAPG2	ENST00000409339;ENST00000467785;ENST00000356309;ENST00000409423;ENST00000432615;ENST00000441982;ENST00000474940;ENST00000475918;ENST00000621338	non-SMC condensin II complex subunit G2 [Source:HGNC Symbol;Acc:HGNC:21904]	protein_coding;retained_intron;nonsense_mediated_decay;processed_transcript	21.1768	21.7626	20.2266	19.5271	20.0068	19.7155	16.4348	16.9447	15.3942	2.03508e-09	8.31546e-08
ENSG00000089597	GANAB	ENST00000356638;ENST00000346178;ENST00000540933;ENST00000526732;ENST00000648273;ENST00000534422;ENST00000526210;ENST00000534419;ENST00000526392;ENST00000529737;ENST00000524437;ENST00000525994;ENST00000531563;ENST00000528503;ENST00000534613	glucosidase II alpha subunit [Source:HGNC Symbol;Acc:HGNC:4138]	protein_coding;retained_intron;processed_transcript;nonsense_mediated_decay	177.214	165.616	169.236	159.993	154.422	160.354	139.54	141.643	146.803	2.1037e-09	8.50465e-08
ENSG00000130649	CYP2E1	ENST00000463117;ENST00000469258;ENST00000252945;ENST00000480558;ENST00000368520	cytochrome P450 family 2 subfamily E member 1 [Source:HGNC Symbol;Acc:HGNC:2631]	protein_coding;processed_transcript;retained_intron	0	0.00853167	0.00615566	0.0357002	0.0275489	0.0277864	0.0854164	0.110214	0.101618	2.1361e-09	8.59478e-08
ENSG00000171992	SYNPO	ENST00000307662;ENST00000394243;ENST00000519664	synaptopodin [Source:HGNC Symbol;Acc:HGNC:30672]	protein_coding	0.58835	0.45717	0.427788	0.869479	0.856388	0.829373	1.18264	0.977819	1.13366	2.66842e-09	1.04549e-07
ENSG00000130935	NOL11	ENST00000581375;ENST00000253247;ENST00000583108;ENST00000581106;ENST00000584032;ENST00000577687;ENST00000584942;ENST00000580914;ENST00000583021;ENST00000581966	nucleolar protein 11 [Source:HGNC Symbol;Acc:HGNC:24557]	nonsense_mediated_decay;protein_coding;retained_intron;processed_transcript	35.3549	36.085	33.8544	32.8105	33.5799	32.0242	25.8495	27.7831	25.9802	2.77302e-09	1.07541e-07
ENSG00000184009	ACTG1	ENST00000615544;ENST00000572105;ENST00000575659;ENST00000681052;ENST00000573283;ENST00000679778;ENST00000571721;ENST00000575842;ENST00000679535;ENST00000574671;ENST00000576209;ENST00000575087;ENST00000570382;ENST00000576917;ENST00000681842;ENST00000576544;ENST00000679410;ENST00000575994;ENST00000644774	actin gamma 1 [Source:HGNC Symbol;Acc:HGNC:144]	protein_coding;nonsense_mediated_decay;retained_intron	948.652	917.875	909.08	851.215	822.099	845.007	803.455	800.631	868.587	3.14297e-09	1.2066e-07
ENSG00000175166	PSMD2	ENST00000310118;ENST00000492191;ENST00000459910;ENST00000491494;ENST00000488085;ENST00000487475;ENST00000463602;ENST00000460628;ENST00000417952;ENST00000485937;ENST00000476461;ENST00000491149;ENST00000439383;ENST00000473991;ENST00000496925;ENST00000466987;ENST00000433010	proteasome 26S subunit ubiquitin receptor, non-ATPase 2 [Source:HGNC Symbol;Acc:HGNC:9559]	protein_coding;retained_intron;processed_transcript;nonsense_mediated_decay	92.3824	95.3451	97.1081	92.9899	88.6577	89.3351	75.1985	76.9868	75.2553	3.73329e-09	1.41189e-07
ENSG00000030066	NUP160	ENST00000694866;ENST00000378460;ENST00000526870;ENST00000528071;ENST00000527126;ENST00000528501;ENST00000527750;ENST00000694867;ENST00000531016;ENST00000532773;ENST00000526569	nucleoporin 160 [Source:HGNC Symbol;Acc:HGNC:18017]	protein_coding;retained_intron;nonsense_mediated_decay	13.9328	14.7694	13.6354	12.4907	12.9206	12.9555	10.8309	10.9911	10.3952	3.90697e-09	1.47028e-07
ENSG00000161960	EIF4A1	ENST00000582746;ENST00000577269;ENST00000584860;ENST00000578495;ENST00000583389;ENST00000578324;ENST00000293831;ENST00000584798;ENST00000584901;ENST00000583899;ENST00000577731;ENST00000582050;ENST00000581808;ENST00000580461;ENST00000578476;ENST00000582848;ENST00000396527;ENST00000581770;ENST00000578569;ENST00000583802;ENST00000584712;ENST00000577929;ENST00000582213;ENST00000579139;ENST00000584054…	eukaryotic translation initiation factor 4A1 [Source:HGNC Symbol;Acc:HGNC:3282]	protein_coding;retained_intron;nonsense_mediated_decay;processed_transcript	227.195	229.08	224.128	213.259	209.529	214.287	201.403	195.69	204.164	6.93137e-09	2.47235e-07
ENSG00000135679	MDM2	ENST00000539479;ENST00000258149;ENST00000393416;ENST00000311420;ENST00000493419;ENST00000258148;ENST00000537182;ENST00000393413;ENST00000545204;ENST00000540352;ENST00000671567;ENST00000543046;ENST00000536089;ENST00000350057;ENST00000665020;ENST00000544561;ENST00000393415;ENST00000400501;ENST00000393417;ENST00000481186;ENST00000542502;ENST00000496959;ENST00000666617;ENST00000471946;ENST00000544125	MDM2 proto-oncogene [Source:HGNC Symbol;Acc:HGNC:6973]	protein_coding;nonsense_mediated_decay;retained_intron;processed_transcript	25.8292	23.9711	24.8025	25.5467	28.285	26.9101	31.7979	32.9904	31.1899	1.14068e-08	3.93327e-07
ENSG00000109062	SLC9A3R1	ENST00000262613;ENST00000583369;ENST00000413388;ENST00000578958;ENST00000581356	SLC9A3 regulator 1 [Source:HGNC Symbol;Acc:HGNC:11075]	protein_coding;retained_intron;nonsense_mediated_decay	300.529	267.135	281.73	267.039	265.151	272.201	230.602	227.843	235.642	1.32202e-08	4.45773e-07
ENSG00000120738	EGR1	ENST00000239938	early growth response 1 [Source:HGNC Symbol;Acc:HGNC:3238]	protein_coding	15.5135	14.4594	14.8185	11.7872	9.5041	9.90112	13.0118	12.327	13.8536	1.42513e-08	4.77371e-07
ENSG00000107968	MAP3K8	ENST00000375321;ENST00000263056;ENST00000542547;ENST00000375322;ENST00000415139;ENST00000430603;ENST00000413724	mitogen-activated protein kinase kinase kinase 8 [Source:HGNC Symbol;Acc:HGNC:6860]	protein_coding;retained_intron	3.9987	4.07844	4.12335	4.96644	4.55426	5.17179	6.27882	6.35481	6.61073	2.01861e-08	6.54587e-07
ENSG00000167900	TK1	ENST00000588734;ENST00000301634;ENST00000590430;ENST00000590862;ENST00000592126;ENST00000586613	thymidine kinase 1 [Source:HGNC Symbol;Acc:HGNC:11830]	protein_coding;retained_intron	38.913	41.3072	39.5027	37.139	36.4955	35.6813	28.2247	31.1101	28.5573	2.08935e-08	6.76088e-07
ENSG00000171105	INSR	ENST00000302850;ENST00000341500;ENST00000600492;ENST00000593970;ENST00000601099;ENST00000597211;ENST00000598216	insulin receptor [Source:HGNC Symbol;Acc:HGNC:6091]	protein_coding;retained_intron	5.10889	4.63493	5.03562	5.6113	5.42008	5.96146	6.99101	6.64515	6.24418	2.13049e-08	6.86488e-07
ENSG00000169429	CXCL8	ENST00000307407;ENST00000696131;ENST00000483500;ENST00000401931	C-X-C motif chemokine ligand 8 [Source:HGNC Symbol;Acc:HGNC:6025]	protein_coding;nonsense_mediated_decay;retained_intron	0.692164	0.810642	0.673921	0.907235	1.3984	1.43686	2.11463	2.07636	1.818	2.14511e-08	6.89739e-07
ENSG00000213390	ARHGAP19	ENST00000358308;ENST00000358531;ENST00000493068;ENST00000466484	Rho GTPase activating protein 19 [Source:HGNC Symbol;Acc:HGNC:23724]	protein_coding;retained_intron	3.49842	3.3759	3.32195	3.05486	3.01726	3.08422	1.97422	2.39127	1.95554	2.65199e-08	8.35102e-07
ENSG00000111912	NCOA7	ENST00000438495;ENST00000368357;ENST00000392477;ENST00000229634;ENST00000419660;ENST00000453302;ENST00000417494;ENST00000487635	nuclear receptor coactivator 7 [Source:HGNC Symbol;Acc:HGNC:21081]	protein_coding;processed_transcript	3.79904	4.1679	3.55826	4.50809	4.85151	4.53283	5.32123	5.54557	4.99639	2.70998e-08	8.48108e-07
ENSG00000062725	APPBP2	ENST00000589341;ENST00000083182;ENST00000592995;ENST00000588668;ENST00000590244	amyloid beta precursor protein binding protein 2 [Source:HGNC Symbol;Acc:HGNC:622]	nonsense_mediated_decay;protein_coding;processed_transcript	92.0265	89.9802	88.9022	92.7632	98.1913	95.3061	100.933	108.575	99.8181	2.7332e-08	8.53622e-07
ENSG00000198890	PRMT6	ENST00000370078;ENST00000649727;ENST00000650338	protein arginine methyltransferase 6 [Source:HGNC Symbol;Acc:HGNC:18241]	protein_coding;retained_intron;nonsense_mediated_decay	53.5812	55.6723	56.6571	52.1633	50.9276	52.9689	40.4181	43.5169	43.1548	2.89046e-08	9.00888e-07
ENSG00000112118	MCM3	ENST00000616552;ENST00000229854;ENST00000596288;ENST00000419835;ENST00000421471;ENST00000476448	minichromosome maintenance complex component 3 [Source:HGNC Symbol;Acc:HGNC:6945]	protein_coding;processed_transcript	58.583	59.8392	56.1357	56.2731	53.8516	53.6642	45.0011	45.3492	44.9909	3.33628e-08	1.0335e-06
ENSG00000135926	TMBIM1	ENST00000445635;ENST00000444881;ENST00000465082;ENST00000396809;ENST00000258412;ENST00000444183;ENST00000492966;ENST00000420341;ENST00000429501;ENST00000476429;ENST00000466012;ENST00000495113;ENST00000425694;ENST00000444000;ENST00000434015;ENST00000418569;ENST00000453281;ENST00000440422;ENST00000453776	transmembrane BAX inhibitor motif containing 1 [Source:HGNC Symbol;Acc:HGNC:23410]	protein_coding;retained_intron	3.04074	3.01545	2.86707	3.75236	2.9413	3.54135	4.68044	4.80423	4.57485	3.67282e-08	1.12858e-06
ENSG00000101057	MYBL2	ENST00000217026;ENST00000396863	MYB proto-oncogene like 2 [Source:HGNC Symbol;Acc:HGNC:7548]	protein_coding	94.8594	86.6161	91.5069	85.2515	82.4776	85.6552	71.2438	70.9937	68.1284	4.19095e-08	1.2724e-06
ENSG00000162073	PAQR4	ENST00000293978;ENST00000574988;ENST00000318782	progestin and adipoQ receptor family member 4 [Source:HGNC Symbol;Acc:HGNC:26386]	protein_coding	30.0225	29.2388	29.304	28.3593	27.1966	27.9289	22.774	21.5773	23.0808	5.51539e-08	1.62558e-06
ENSG00000155034	FBXL18	ENST00000382368;ENST00000415009;ENST00000458142	F-box and leucine rich repeat protein 18 [Source:HGNC Symbol;Acc:HGNC:21874]	protein_coding;nonsense_mediated_decay	4.25806	4.37235	4.20173	4.66696	4.41452	4.66297	5.429	5.36382	5.59167	6.59644e-08	1.90771e-06
ENSG00000019582	CD74	ENST00000009530;ENST00000353334;ENST00000524315;ENST00000522153;ENST00000517752	CD74 molecule [Source:HGNC Symbol;Acc:HGNC:1697]	protein_coding;retained_intron	3.25811	2.77787	3.06362	3.94716	3.80815	3.96963	4.8067	4.7038	4.82472	6.77502e-08	1.95565e-06
ENSG00000173175	ADCY5	ENST00000462833;ENST00000699718;ENST00000699714;ENST00000478092;ENST00000491190;ENST00000474577;ENST00000699719;ENST00000699717;ENST00000468683;ENST00000476455	adenylate cyclase 5 [Source:HGNC Symbol;Acc:HGNC:236]	protein_coding;retained_intron;processed_transcript;nonsense_mediated_decay	3.99678	3.79283	3.84575	4.86585	4.40724	4.93676	4.98204	5.07125	5.24728	7.44565e-08	2.1211e-06
ENSG00000148175	STOM	ENST00000286713;ENST00000538954	stomatin [Source:HGNC Symbol;Acc:HGNC:3383]	protein_coding	61.3601	60.3538	57.3465	64.8662	66.7994	65.9854	74.5025	80.4045	72.2591	7.80647e-08	2.21149e-06
ENSG00000076382	SPAG5	ENST00000321765;ENST00000580567;ENST00000580406;ENST00000580676;ENST00000578479;ENST00000580682;ENST00000580377;ENST00000584206;ENST00000581133;ENST00000578230;ENST00000580083;ENST00000378976;ENST00000536674;ENST00000582175;ENST00000577259	sperm associated antigen 5 [Source:HGNC Symbol;Acc:HGNC:13452]	protein_coding;nonsense_mediated_decay;retained_intron	10.2749	10.4578	9.71931	9.12009	9.22766	10.0267	7.57254	7.31131	7.50251	1.1161e-07	3.1212e-06
ENSG00000143367	TUFT1	ENST00000392712;ENST00000368848;ENST00000368849;ENST00000490156;ENST00000461859;ENST00000498606	tuftelin 1 [Source:HGNC Symbol;Acc:HGNC:12422]	protein_coding;retained_intron	15.1732	15.6924	15.3062	16.0269	16.9437	16.5957	19.8758	19.1658	19.4736	1.17752e-07	3.26897e-06
ENSG00000117280	RAB29	ENST00000367139;ENST00000235932;ENST00000414729;ENST00000468887;ENST00000528078;ENST00000492534;ENST00000446390;ENST00000437324	RAB29, member RAS oncogene family [Source:HGNC Symbol;Acc:HGNC:9789]	protein_coding;processed_transcript;nonsense_mediated_decay;retained_intron	12.1894	11.3268	12.0492	14.0748	15.3038	14.3414	15.4616	15.9437	15.0483	1.30385e-07	3.58053e-06
ENSG00000069812	HES2	ENST00000377834;ENST00000487437;ENST00000377837;ENST00000471190;ENST00000489730;ENST00000377836	hes family bHLH transcription factor 2 [Source:HGNC Symbol;Acc:HGNC:16005]	protein_coding;processed_transcript	2.80943	2.3157	3.12099	3.37822	3.19642	3.36401	4.35025	4.19648	4.92264	1.41439e-07	3.87711e-06
ENSG00000168393	DTYMK	ENST00000400770;ENST00000305784;ENST00000464603;ENST00000432348;ENST00000420144;ENST00000445261	deoxythymidylate kinase [Source:HGNC Symbol;Acc:HGNC:3061]	nonsense_mediated_decay;protein_coding;retained_intron	10.7835	11.6247	12.314	9.45985	9.66782	9.4657	8.27123	7.26473	7.53965	1.44665e-07	3.95841e-06
ENSG00000144867	SRPRB	ENST00000678299;ENST00000466636;ENST00000481356;ENST00000494297;ENST00000484684	SRP receptor subunit beta [Source:HGNC Symbol;Acc:HGNC:24085]	protein_coding;nonsense_mediated_decay;retained_intron	14.1206	14.9882	15.6387	13.5839	13.9402	13.7356	10.7228	10.5575	11.5667	1.4834e-07	4.05171e-06
ENSG00000129474	AJUBA	ENST00000397388;ENST00000262713;ENST00000553592;ENST00000556731;ENST00000553911;ENST00000555479;ENST00000553736	ajuba LIM protein [Source:HGNC Symbol;Acc:HGNC:20250]	protein_coding;retained_intron	7.52686	7.33106	7.98715	8.53929	8.60783	8.65971	10.064	9.80379	10.1291	1.53079e-07	4.17368e-06
ENSG00000119280	C1orf198	ENST00000366663;ENST00000470540;ENST00000522201;ENST00000521263	chromosome 1 open reading frame 198 [Source:HGNC Symbol;Acc:HGNC:25900]	protein_coding;retained_intron	9.06815	8.37312	8.61625	7.47414	7.71032	7.49856	6.66228	6.65546	6.48068	1.66691e-07	4.51805e-06
ENSG00000163435	ELF3	ENST00000367283;ENST00000359651;ENST00000495848;ENST00000367284;ENST00000470384;ENST00000446188;ENST00000498017;ENST00000490203;ENST00000479874;ENST00000475698	E74 like ETS transcription factor 3 [Source:HGNC Symbol;Acc:HGNC:3318]	protein_coding;processed_transcript	10.3833	9.53276	10.1437	11.3653	10.4219	11.375	13.4665	12.5605	12.8011	1.85496e-07	4.94257e-06
ENSG00000110063	DCPS	ENST00000263579;ENST00000529149;ENST00000648516	decapping enzyme, scavenger [Source:HGNC Symbol;Acc:HGNC:29812]	protein_coding;retained_intron	2.61822	2.85196	2.86498	2.19376	2.14033	2.17633	1.64514	1.93815	1.66959	1.87473e-07	4.98652e-06
ENSG00000157193	LRP8	ENST00000659993;ENST00000653217;ENST00000669432;ENST00000668071;ENST00000668448;ENST00000662198;ENST00000465675;ENST00000306052;ENST00000371454;ENST00000496580;ENST00000667377;ENST00000656486;ENST00000654834;ENST00000459674;ENST00000661457;ENST00000653810;ENST00000657047;ENST00000655704;ENST00000662604;ENST00000657895;ENST00000653169;ENST00000654947;ENST00000654634;ENST00000658277;ENST00000658404…	LDL receptor related protein 8 [Source:HGNC Symbol;Acc:HGNC:6700]	protein_coding;retained_intron;nonsense_mediated_decay;processed_transcript	2.47327	2.47764	2.79067	2.4179	2.31755	2.28035	1.84712	1.94676	1.89571	1.88041e-07	4.99292e-06
ENSG00000187514	PTMA	ENST00000409683;ENST00000412128;ENST00000448874;ENST00000481928;ENST00000468027;ENST00000341369;ENST00000467816;ENST00000466801;ENST00000409115;ENST00000440384;ENST00000410064	prothymosin alpha [Source:HGNC Symbol;Acc:HGNC:9623]	protein_coding;nonsense_mediated_decay;retained_intron;processed_transcript	308.836	326.775	319.309	295.523	286.756	285.701	280.551	263.599	280.126	1.99009e-07	5.22947e-06
ENSG00000091831	ESR1	ENST00000440973;ENST00000443427;ENST00000206249;ENST00000456483;ENST00000446550;ENST00000641399;ENST00000406599;ENST00000415488;ENST00000338799;ENST00000473497;ENST00000482101;ENST00000404742;ENST00000488573;ENST00000427531	estrogen receptor 1 [Source:HGNC Symbol;Acc:HGNC:3467]	protein_coding;processed_transcript	20.0014	20.2809	19.2921	18.1136	18.3892	17.686	15.2548	16.0019	15.2513	2.25566e-07	5.79738e-06
ENSG00000074410	CA12	ENST00000178638;ENST00000344366;ENST00000560293;ENST00000560666;ENST00000422263;ENST00000558287	carbonic anhydrase 12 [Source:HGNC Symbol;Acc:HGNC:1371]	protein_coding;retained_intron;processed_transcript	35.6848	33.5136	33.8499	32.7195	29.1136	31.0954	26.2463	27.1135	25.9508	2.92775e-07	7.36333e-06
ENSG00000126457	PRMT1	ENST00000525616;ENST00000610806;ENST00000534676;ENST00000391851;ENST00000454376;ENST00000527866;ENST00000534280;ENST00000529284;ENST00000527412;ENST00000524771;ENST00000526224;ENST00000529836;ENST00000529650;ENST00000532489;ENST00000530361;ENST00000528126;ENST00000530070;ENST00000525915;ENST00000534465;ENST00000528623	protein arginine methyltransferase 1 [Source:HGNC Symbol;Acc:HGNC:5187]	retained_intron;protein_coding;processed_transcript;nonsense_mediated_decay	77.563	81.1106	82.2526	76.5457	73.5563	74.0949	64.5873	61.8361	65.0479	3.03293e-07	7.60278e-06
ENSG00000163346	PBXIP1	ENST00000368463;ENST00000368460;ENST00000368465;ENST00000493133;ENST00000498553	PBX homeobox interacting protein 1 [Source:HGNC Symbol;Acc:HGNC:21199]	protein_coding;processed_transcript	13.1361	13.6209	14.4583	15.2658	15.5598	14.8138	18.9734	16.9204	18.0969	3.34463e-07	8.30221e-06
ENSG00000168477	TNXB	ENST00000647633;ENST00000644971;ENST00000479795;ENST00000451343;ENST00000498094;ENST00000490077;ENST00000486148;ENST00000442721	tenascin XB [Source:HGNC Symbol;Acc:HGNC:11976]	protein_coding;retained_intron	0.194313	0.170944	0.241697	0.282857	0.256823	0.271408	0.46268	0.455778	0.411514	3.75169e-07	9.22249e-06
ENSG00000157064	NMNAT2	ENST00000287713;ENST00000464047;ENST00000294868	nicotinamide nucleotide adenylyltransferase 2 [Source:HGNC Symbol;Acc:HGNC:16789]	protein_coding;processed_transcript	1.11456	0.911775	1.2263	1.53685	1.37726	1.3711	2.07392	1.93998	2.0421	3.97436e-07	9.72283e-06
ENSG00000023287	RB1CC1	ENST00000025008;ENST00000435644;ENST00000519912;ENST00000518710;ENST00000523594;ENST00000522957;ENST00000517963;ENST00000518211	RB1 inducible coiled-coil 1 [Source:HGNC Symbol;Acc:HGNC:15574]	protein_coding;nonsense_mediated_decay;retained_intron	7.07506	6.99702	7.23125	7.89984	8.04878	8.79453	9.51079	9.37862	8.74369	4.00602e-07	9.76893e-06
ENSG00000175220	ARHGAP1	ENST00000311956;ENST00000527588;ENST00000528837;ENST00000529960;ENST00000525488;ENST00000526423;ENST00000524594	Rho GTPase activating protein 1 [Source:HGNC Symbol;Acc:HGNC:673]	protein_coding;retained_intron	23.4062	20.3215	20.4704	18.9268	18.5935	19.8811	16.5908	16.4008	16.3926	4.21357e-07	1.02097e-05
ENSG00000134690	CDCA8	ENST00000373055;ENST00000327331	cell division cycle associated 8 [Source:HGNC Symbol;Acc:HGNC:14629]	protein_coding	21.9769	21.6134	20.0345	18.4581	17.0975	17.8138	16.3585	15.5899	15.9488	4.32492e-07	1.04298e-05
ENSG00000110911	SLC11A2	ENST00000262052;ENST00000541174;ENST00000394904;ENST00000550782;ENST00000547688;ENST00000546636;ENST00000644495;ENST00000646264;ENST00000549193;ENST00000547510;ENST00000546488;ENST00000548554;ENST00000646988;ENST00000548150;ENST00000548193;ENST00000551231;ENST00000549110;ENST00000547198;ENST00000681324;ENST00000646740;ENST00000550714;ENST00000550995;ENST00000643884;ENST00000546743;ENST00000550061…	solute carrier family 11 member 2 [Source:HGNC Symbol;Acc:HGNC:10908]	protein_coding;retained_intron;nonsense_mediated_decay;processed_transcript	15.6354	16.1261	14.9811	16.743	16.6971	16.8409	19.0066	19.5029	18.9823	5.49986e-07	1.30161e-05
ENSG00000151012	SLC7A11	ENST00000280612;ENST00000509248	solute carrier family 7 member 11 [Source:HGNC Symbol;Acc:HGNC:11059]	protein_coding;nonsense_mediated_decay	2.08272	1.74102	1.75545	2.11508	2.03604	2.15613	2.57899	2.85266	2.76443	5.61711e-07	1.32729e-05
ENSG00000111859	NEDD9	ENST00000379446;ENST00000620854;ENST00000505589;ENST00000448183;ENST00000461055;ENST00000459670;ENST00000379433	neural precursor cell expressed, developmentally down-regulated 9 [Source:HGNC Symbol;Acc:HGNC:7733]	protein_coding;retained_intron;nonsense_mediated_decay;processed_transcript	4.21005	3.90937	3.76241	4.37821	4.15257	4.20632	4.99585	4.98357	5.03978	6.01836e-07	1.40931e-05
ENSG00000151632	AKR1C2	ENST00000380753;ENST00000460124;ENST00000604507;ENST00000421196;ENST00000604428;ENST00000604439;ENST00000604711;ENST00000455190;ENST00000603073;ENST00000604184	aldo-keto reductase family 1 member C2 [Source:HGNC Symbol;Acc:HGNC:385]	protein_coding;retained_intron;processed_transcript	36.594	39.7057	39.7196	46.5057	45.5125	45.6685	48.5217	48.4738	45.3828	6.14637e-07	1.43456e-05
ENSG00000105388	CEACAM5	ENST00000405816;ENST00000221992;ENST00000398599;ENST00000617332;ENST00000596606;ENST00000595113;ENST00000460121	CEA cell adhesion molecule 5 [Source:HGNC Symbol;Acc:HGNC:1817]	protein_coding;retained_intron	9.90818	7.99308	9.59846	6.6776	5.76996	6.50711	7.89923	7.31712	7.7461	6.48577e-07	1.50685e-05
ENSG00000170412	GPRC5C	ENST00000652232;ENST00000392627;ENST00000392628;ENST00000342648;ENST00000582473;ENST00000482723;ENST00000481232;ENST00000582873;ENST00000581590;ENST00000577663	G protein-coupled receptor class C group 5 member C [Source:HGNC Symbol;Acc:HGNC:13309]	protein_coding;retained_intron;processed_transcript	4.23765	4.64177	4.52536	5.27809	4.92791	4.53433	6.07425	5.59719	6.09638	6.65222e-07	1.54083e-05
ENSG00000170832	USP32	ENST00000590133;ENST00000300896;ENST00000591768;ENST00000586238;ENST00000593071;ENST00000589335;ENST00000588898;ENST00000589761;ENST00000585720;ENST00000589552;ENST00000587651;ENST00000393003	ubiquitin specific peptidase 32 [Source:HGNC Symbol;Acc:HGNC:19143]	protein_coding;retained_intron;nonsense_mediated_decay	107.978	103.426	101.765	110.172	109.865	111.827	116.202	116.667	109.786	6.68849e-07	1.54365e-05
ENSG00000175155	YPEL2	ENST00000312655;ENST00000672916;ENST00000582192;ENST00000582813;ENST00000581865	yippee like 2 [Source:HGNC Symbol;Acc:HGNC:18326]	protein_coding;retained_intron;processed_transcript	2.16711	2.39899	2.32008	2.56412	2.89165	2.47407	3.53936	3.04068	3.31622	6.6786e-07	1.54365e-05
ENSG00000166851	PLK1	ENST00000562272;ENST00000300093;ENST00000564794;ENST00000567897;ENST00000562407;ENST00000568568;ENST00000564947;ENST00000570220	polo like kinase 1 [Source:HGNC Symbol;Acc:HGNC:9077]	retained_intron;protein_coding;nonsense_mediated_decay	24.1424	22.6682	24.5872	21.2217	21.8641	22.2905	19.4376	18.6202	17.7435	6.76978e-07	1.55623e-05
ENSG00000175063	UBE2C	ENST00000335046;ENST00000352551;ENST00000356455;ENST00000372568;ENST00000405520;ENST00000496085;ENST00000243893;ENST00000617055	ubiquitin conjugating enzyme E2 C [Source:HGNC Symbol;Acc:HGNC:15937]	protein_coding;processed_transcript	70.2332	74.5072	69.6711	64.0293	61.6987	62.1757	54.2154	54.0686	56.0601	7.48273e-07	1.71495e-05
ENSG00000175147	TMEM51-AS1	ENST00000404665;ENST00000310916;ENST00000667108;ENST00000669314	TMEM51 antisense RNA 1 [Source:HGNC Symbol;Acc:HGNC:26301]	lncRNA	0.0892714	0.092874	0.0930199	0.170556	0.193312	0.104021	0.23945	0.307413	0.266374	8.10181e-07	1.84023e-05
ENSG00000140519	RHCG	ENST00000268122;ENST00000559638;ENST00000558184;ENST00000560081	Rh family C glycoprotein [Source:HGNC Symbol;Acc:HGNC:18140]	protein_coding;retained_intron;nonsense_mediated_decay	0.406556	0.26858	0.244697	0.464506	0.556205	0.512109	1.12344	1.11045	0.773097	8.54785e-07	1.93578e-05
ENSG00000111206	FOXM1	ENST00000627656;ENST00000361953;ENST00000359843;ENST00000342628;ENST00000536066;ENST00000366362;ENST00000535350;ENST00000545049;ENST00000538564;ENST00000537018	forkhead box M1 [Source:HGNC Symbol;Acc:HGNC:3818]	protein_coding;retained_intron;nonsense_mediated_decay;processed_transcript	21.5964	21.5282	21.2698	19.5429	19.1704	19.114	16.5562	16.599	17.2158	8.97109e-07	2.02261e-05
ENSG00000112309	B3GAT2	ENST00000230053	beta-1,3-glucuronyltransferase 2 [Source:HGNC Symbol;Acc:HGNC:922]	protein_coding	0.262513	0.417266	0.326546	0.258744	0.079117	0.188849	0.075942	0.029329	0.058746	9.72836e-07	2.18044e-05
ENSG00000101605	MYOM1	ENST00000356443;ENST00000581804	myomesin 1 [Source:HGNC Symbol;Acc:HGNC:7613]	protein_coding;processed_transcript	0.0356242	0.01279	0.0239449	0.0920448	0.0931076	0.0868328	0.151387	0.181719	0.162928	1.0281e-06	2.29418e-05
ENSG00000140988	RPS2	ENST00000531065;ENST00000527871;ENST00000530225;ENST00000533161;ENST00000343262;ENST00000533872;ENST00000526586;ENST00000527826;ENST00000529806;ENST00000527302;ENST00000533186;ENST00000526522;ENST00000534461;ENST00000526908;ENST00000532746;ENST00000563194	ribosomal protein S2 [Source:HGNC Symbol;Acc:HGNC:10404]	retained_intron;protein_coding;nonsense_mediated_decay	788.814	870.494	846.38	781.615	739.449	720.112	751.29	703.547	740.836	1.06774e-06	2.37223e-05
ENSG00000148773	MKI67	ENST00000368653;ENST00000368654;ENST00000484853;ENST00000478293;ENST00000464771	marker of proliferation Ki-67 [Source:HGNC Symbol;Acc:HGNC:7107]	protein_coding;processed_transcript	20.5519	19.2729	18.6997	17.7828	16.4242	18.1122	15.5445	15.0724	14.9793	1.11922e-06	2.47218e-05
ENSG00000156976	EIF4A2	ENST00000443963;ENST00000440191;ENST00000429589;ENST00000468362;ENST00000323963;ENST00000426808;ENST00000494445;ENST00000425053;ENST00000485101;ENST00000496382;ENST00000497177;ENST00000466362;ENST00000465792;ENST00000486805;ENST00000465267;ENST00000461021;ENST00000465222;ENST00000475653;ENST00000492144;ENST00000475409;ENST00000467585;ENST00000495049;ENST00000491473;ENST00000465032;ENST00000498746…	eukaryotic translation initiation factor 4A2 [Source:HGNC Symbol;Acc:HGNC:3284]	nonsense_mediated_decay;protein_coding;retained_intron	38.6068	39.3662	37.1459	42.452	42.3314	41.1987	47.2955	45.4055	47.3008	1.21154e-06	2.66067e-05
ENSG00000075426	FOSL2	ENST00000264716;ENST00000379619;ENST00000436647;ENST00000460736	FOS like 2, AP-1 transcription factor subunit [Source:HGNC Symbol;Acc:HGNC:3798]	protein_coding;processed_transcript	17.295	17.3148	15.457	18.7716	17.7788	18.3327	20.4324	19.7712	20.2932	1.23388e-06	2.70584e-05
ENSG00000183718	TRIM52	ENST00000611618;ENST00000612671;ENST00000510796;ENST00000688015;ENST00000686030;ENST00000503005;ENST00000685507;ENST00000513146	tripartite motif containing 52 [Source:HGNC Symbol;Acc:HGNC:19024]	protein_coding;retained_intron;processed_transcript	1.43719	1.41506	1.59343	1.70096	1.61823	1.73517	2.36249	2.36632	2.36704	1.35772e-06	2.95194e-05
ENSG00000099204	ABLIM1	ENST00000533213;ENST00000392952;ENST00000651092;ENST00000369253;ENST00000481974;ENST00000369256;ENST00000651023;ENST00000440467;ENST00000477638;ENST00000485570;ENST00000466400;ENST00000392955;ENST00000428430	actin binding LIM protein 1 [Source:HGNC Symbol;Acc:HGNC:78]	protein_coding;retained_intron;processed_transcript	4.06027	3.99728	4.15202	4.5497	4.45358	4.3396	5.13832	5.30059	4.92481	1.37077e-06	2.97605e-05
ENSG00000139725	RHOF	ENST00000267205;ENST00000537171;ENST00000546227;ENST00000537265;ENST00000541657;ENST00000545544;ENST00000535560	ras homolog family member F, filopodia associated [Source:HGNC Symbol;Acc:HGNC:15703]	protein_coding;processed_transcript	3.50843	4.31874	2.83085	4.50222	5.2234	5.10039	5.21881	5.8527	5.037	1.56235e-06	3.35377e-05
ENSG00000109107	ALDOC	ENST00000395319;ENST00000226253;ENST00000395321;ENST00000460201;ENST00000584086;ENST00000578590;ENST00000582381	aldolase, fructose-bisphosphate C [Source:HGNC Symbol;Acc:HGNC:418]	protein_coding;retained_intron	19.9958	23.0455	20.8775	15.7539	16.2651	15.4669	20.022	19.6682	18.6262	1.5796e-06	3.38128e-05
ENSG00000106853	PTGR1	ENST00000407693;ENST00000374313;ENST00000466771;ENST00000309195;ENST00000374308;ENST00000374324;ENST00000422125	prostaglandin reductase 1 [Source:HGNC Symbol;Acc:HGNC:18429]	protein_coding;retained_intron;nonsense_mediated_decay	11.0654	11.3562	11.1221	12.2151	12.6723	12.5882	13.8887	14.6584	14.5813	1.6559e-06	3.5248e-05
ENSG00000074071	MRPS34	ENST00000397375;ENST00000177742;ENST00000569585	mitochondrial ribosomal protein S34 [Source:HGNC Symbol;Acc:HGNC:16618]	protein_coding;retained_intron	85.498	89.0546	86.832	76.5539	76.8498	76.4503	69.5645	63.7286	68.2195	1.71113e-06	3.62717e-05
ENSG00000137801	THBS1	ENST00000260356;ENST00000497720;ENST00000484734;ENST00000397591;ENST00000490247;ENST00000466755;ENST00000559746;ENST00000560894	thrombospondin 1 [Source:HGNC Symbol;Acc:HGNC:11785]	protein_coding;retained_intron	42.6654	41.7528	32.8217	31.3729	29.6134	31.6644	30.2872	29.3943	28.0218	1.71915e-06	3.63406e-05
ENSG00000134333	LDHA	ENST00000430553;ENST00000545215;ENST00000542179;ENST00000540430;ENST00000538451;ENST00000422447;ENST00000494573;ENST00000375710;ENST00000537296;ENST00000227157;ENST00000379412;ENST00000543445;ENST00000460405;ENST00000545467;ENST00000486690;ENST00000478970;ENST00000469976;ENST00000539814;ENST00000495052;ENST00000535451	lactate dehydrogenase A [Source:HGNC Symbol;Acc:HGNC:6535]	protein_coding;nonsense_mediated_decay;retained_intron	154.306	166.486	159.844	146.996	139.794	138.644	141.758	138.369	139.492	1.72315e-06	3.63747e-05
ENSG00000148400	NOTCH1	ENST00000680133;ENST00000680668;ENST00000680218;ENST00000651671;ENST00000681454;ENST00000491649;ENST00000645828;ENST00000681298;ENST00000680778;ENST00000680882;ENST00000680003;ENST00000679595;ENST00000679969;ENST00000646957	notch receptor 1 [Source:HGNC Symbol;Acc:HGNC:7881]	protein_coding;nonsense_mediated_decay;retained_intron	13.3614	11.7795	12.6263	14.7125	13.4382	14.5568	16.6327	14.8563	16.5391	1.80206e-06	3.77269e-05
ENSG00000100292	HMOX1	ENST00000216117;ENST00000481190;ENST00000679074;ENST00000677931;ENST00000412893;ENST00000494998	heme oxygenase 1 [Source:HGNC Symbol;Acc:HGNC:5013]	protein_coding;nonsense_mediated_decay;retained_intron	7.89351	6.53997	6.92604	7.63281	7.81009	8.54435	10.9671	10.4239	10.0183	1.81765e-06	3.80012e-05
ENSG00000131797	CLUHP3	ENST00000692505;ENST00000563678;ENST00000686087;ENST00000693004;ENST00000254109;ENST00000562354;ENST00000532304;ENST00000686901;ENST00000692346;ENST00000525610;ENST00000431761;ENST00000687555;ENST00000689776;ENST00000687897;ENST00000411844;ENST00000685223	clustered mitochondria homolog pseudogene 3 [Source:HGNC Symbol;Acc:HGNC:28447]	processed_transcript;transcribed_unprocessed_pseudogene;retained_intron	2.68108	2.91583	2.95827	3.01411	3.24897	3.31872	4.10074	3.96121	4.01451	1.85152e-06	3.84454e-05
ENSG00000070961	ATP2B1	ENST00000428670;ENST00000393164;ENST00000261173;ENST00000552275;ENST00000551310;ENST00000551009;ENST00000635033;ENST00000550716;ENST00000359142;ENST00000549727;ENST00000549585	ATPase plasma membrane Ca2+ transporting 1 [Source:HGNC Symbol;Acc:HGNC:814]	protein_coding;retained_intron	13.2042	13.221	13.0194	14.2974	14.2981	14.6208	15.854	16.3144	15.3973	1.96452e-06	4.04612e-05
ENSG00000072195	SPEG	ENST00000498378;ENST00000396698;ENST00000312358;ENST00000464989;ENST00000431523;ENST00000403148;ENST00000451076;ENST00000463218;ENST00000497065;ENST00000452101;ENST00000420132;ENST00000485069;ENST00000475921;ENST00000462545;ENST00000396688	striated muscle enriched protein kinase [Source:HGNC Symbol;Acc:HGNC:16901]	processed_transcript;protein_coding;retained_intron;nonsense_mediated_decay	0.841181	0.767347	0.786826	0.877176	0.948192	0.877309	1.25344	1.12103	1.18283	2.14743e-06	4.38726e-05
ENSG00000013810	TACC3	ENST00000612220;ENST00000652770;ENST00000313288;ENST00000484651;ENST00000651817;ENST00000404054;ENST00000493975;ENST00000458173;ENST00000484264;ENST00000466077;ENST00000470808;ENST00000650779;ENST00000652002	transforming acidic coiled-coil containing protein 3 [Source:HGNC Symbol;Acc:HGNC:11524]	protein_coding;retained_intron;nonsense_mediated_decay;processed_transcript	12.1687	11.1403	11.9283	10.6701	10.4992	11.0798	9.4012	9.11389	8.98217	2.18802e-06	4.45375e-05
ENSG00000079616	KIF22	ENST00000689089;ENST00000691128;ENST00000685526;ENST00000691203;ENST00000688492;ENST00000689107;ENST00000689660;ENST00000689743;ENST00000690258;ENST00000160827;ENST00000691169;ENST00000693260;ENST00000687634;ENST00000686384;ENST00000563666;ENST00000689221;ENST00000563263;ENST00000685961;ENST00000689415;ENST00000690510;ENST00000569636;ENST00000570173;ENST00000561482;ENST00000685401;ENST00000691486…	kinesin family member 22 [Source:HGNC Symbol;Acc:HGNC:6391]	nonsense_mediated_decay;retained_intron;protein_coding;processed_transcript	21.8609	21.2707	20.9995	20.1604	20.104	20.3599	17.0431	17.6347	16.99	2.29519e-06	4.64555e-05
ENSG00000148411	NACC2	ENST00000371753;ENST00000277554	NACC family member 2 [Source:HGNC Symbol;Acc:HGNC:23846]	protein_coding	11.4836	12.0783	12.4193	13.0397	13.0718	13.0618	14.6247	15.427	14.6579	2.43137e-06	4.90815e-05
ENSG00000151892	GFRA1	ENST00000355422;ENST00000439649;ENST00000682743;ENST00000369236;ENST00000682194;ENST00000369234;ENST00000684105;ENST00000490345;ENST00000682489;ENST00000683792;ENST00000683474	GDNF family receptor alpha 1 [Source:HGNC Symbol;Acc:HGNC:4243]	protein_coding	60.2664	57.4318	57.754	52.3621	52.5111	53.2833	49.9129	50.7621	48.0107	2.44773e-06	4.93464e-05
ENSG00000094755	GABRP	ENST00000265294;ENST00000519385;ENST00000518525;ENST00000519598;ENST00000519137	gamma-aminobutyric acid type A receptor subunit pi [Source:HGNC Symbol;Acc:HGNC:4089]	protein_coding;retained_intron	0.671203	0.816943	0.54806	0.856733	0.839731	0.978905	1.37794	1.45552	1.45168	2.4736e-06	4.98021e-05
ENSG00000109929	SC5D	ENST00000264027;ENST00000392789;ENST00000527183;ENST00000534455;ENST00000524683;ENST00000531140	sterol-C5-desaturase [Source:HGNC Symbol;Acc:HGNC:10547]	protein_coding;retained_intron	2.95275	3.11641	2.78739	3.18024	3.18006	3.49885	3.7725	4.21053	3.67032	2.49088e-06	5.00177e-05
ENSG00000177084	POLE	ENST00000320574;ENST00000539357;ENST00000503265;ENST00000699985;ENST00000672742;ENST00000540987;ENST00000545015;ENST00000541627;ENST00000537064;ENST00000434528;ENST00000441786;ENST00000544414;ENST00000699984;ENST00000699981;ENST00000544870;ENST00000539215;ENST00000416953;ENST00000534922;ENST00000539618	DNA polymerase epsilon, catalytic subunit [Source:HGNC Symbol;Acc:HGNC:9177]	protein_coding;retained_intron;processed_transcript;nonsense_mediated_decay	12.2585	11.8354	12.4949	11.8909	10.5312	11.5245	10.2328	9.18065	9.47589	2.72084e-06	5.40656e-05
ENSG00000114166	KAT2B	ENST00000263754;ENST00000468400;ENST00000468111	lysine acetyltransferase 2B [Source:HGNC Symbol;Acc:HGNC:8638]	protein_coding;retained_intron	2.50545	2.38394	2.59717	2.74869	2.70526	3.07143	3.70259	3.96139	3.57267	2.80954e-06	5.57554e-05
ENSG00000105011	ASF1B	ENST00000263382;ENST00000590835;ENST00000592798;ENST00000589468;ENST00000474890	anti-silencing function 1B histone chaperone [Source:HGNC Symbol;Acc:HGNC:20996]	protein_coding;nonsense_mediated_decay	34.5523	33.8106	32.7863	29.3237	30.6588	28.9504	25.8939	25.89	26.239	3.06493e-06	6.02743e-05
ENSG00000161243	FBXO27	ENST00000600828;ENST00000292853;ENST00000593847;ENST00000594770;ENST00000595166;ENST00000598394	F-box protein 27 [Source:HGNC Symbol;Acc:HGNC:18753]	protein_coding;retained_intron	15.1239	15.5497	14.3105	13.9365	13.1666	13.169	11.6028	11.0342	11.568	3.27553e-06	6.3921e-05
ENSG00000158195	WASF2	ENST00000618852;ENST00000536657	WASP family member 2 [Source:HGNC Symbol;Acc:HGNC:12733]	protein_coding	34.4351	32.0037	31.1033	30.1436	30.1134	30.9358	26.3845	25.8757	25.5697	3.4714e-06	6.71417e-05
ENSG00000178397	FAM220A	ENST00000313324;ENST00000530143;ENST00000533877	family with sequence similarity 220 member A [Source:HGNC Symbol;Acc:HGNC:22422]	protein_coding;processed_transcript	1.44759	0.637575	0.855182	6.04118	6.04619	10.9527	6.2597	0.500267	5.83552	3.6246e-06	6.97507e-05
ENSG00000128564	VGF	ENST00000249330;ENST00000445482	VGF nerve growth factor inducible [Source:HGNC Symbol;Acc:HGNC:12684]	protein_coding	10.9167	10.7877	12.5512	13.9476	11.6792	12.9566	15.6289	14.4688	15.8887	3.66445e-06	7.04286e-05
ENSG00000161800	RACGAP1	ENST00000547905;ENST00000312377;ENST00000551016;ENST00000454520;ENST00000548158;ENST00000547061;ENST00000552004;ENST00000546723;ENST00000550149;ENST00000552310;ENST00000546595;ENST00000551260;ENST00000548824;ENST00000551145;ENST00000549777;ENST00000548961;ENST00000546786;ENST00000549342;ENST00000427314;ENST00000550651;ENST00000548598;ENST00000546764;ENST00000552921;ENST00000548644	Rac GTPase activating protein 1 [Source:HGNC Symbol;Acc:HGNC:9804]	protein_coding;retained_intron;processed_transcript;nonsense_mediated_decay	31.45	31.6827	30.3019	29.1725	27.9064	28.7798	24.9526	25.3621	26.498	3.75871e-06	7.1968e-05
ENSG00000141540	TTYH2	ENST00000269346;ENST00000441391;ENST00000578825;ENST00000528152	tweety family member 2 [Source:HGNC Symbol;Acc:HGNC:13877]	protein_coding;retained_intron	0.74349	0.67444	0.952132	0.950528	1.13111	1.14245	1.53757	1.61668	1.63379	3.96472e-06	7.54386e-05
ENSG00000197386	HTT	ENST00000510626;ENST00000680291;ENST00000355072;ENST00000681528;ENST00000509043;ENST00000512909;ENST00000649131;ENST00000512068;ENST00000680360;ENST00000506137;ENST00000509618;ENST00000513326;ENST00000650595;ENST00000509751;ENST00000648150;ENST00000650588;ENST00000647962;ENST00000513639;ENST00000680239;ENST00000508321	huntingtin [Source:HGNC Symbol;Acc:HGNC:4851]	retained_intron;protein_coding;nonsense_mediated_decay;processed_transcript	10.5723	10.2699	10.9298	9.97212	9.97083	10.3233	8.71623	8.48167	8.33708	4.0514e-06	7.68003e-05
ENSG00000156471	PTDSS1	ENST00000337004;ENST00000517309;ENST00000518776;ENST00000517982;ENST00000517557	phosphatidylserine synthase 1 [Source:HGNC Symbol;Acc:HGNC:9587]	nonsense_mediated_decay;protein_coding;processed_transcript;retained_intron	19.285	18.7323	18.5492	17.1556	17.5051	17.4509	15.1048	15.2644	15.4612	4.64422e-06	8.57814e-05
ENSG00000204316	MRPL38	ENST00000309352;ENST00000461602;ENST00000493383;ENST00000474548;ENST00000477371;ENST00000477023;ENST00000464758;ENST00000483393;ENST00000486101;ENST00000477736;ENST00000480203;ENST00000471434;ENST00000585475;ENST00000410030;ENST00000493104;ENST00000588620	mitochondrial ribosomal protein L38 [Source:HGNC Symbol;Acc:HGNC:14033]	protein_coding;retained_intron;processed_transcript	17.0538	16.843	16.7901	13.6009	13.5841	13.2699	13.2808	12.1826	13.7898	4.68032e-06	8.62548e-05
ENSG00000151694	ADAM17	ENST00000650116;ENST00000648548;ENST00000648857;ENST00000699316;ENST00000699320;ENST00000650241;ENST00000649227;ENST00000699315;ENST00000699324;ENST00000310823;ENST00000699323;ENST00000699318;ENST00000647610;ENST00000699322;ENST00000699326;ENST00000647622;ENST00000648002;ENST00000647979;ENST00000699319;ENST00000618923;ENST00000699321;ENST00000649068;ENST00000478059;ENST00000649798;ENST00000699317…	ADAM metallopeptidase domain 17 [Source:HGNC Symbol;Acc:HGNC:195]	nonsense_mediated_decay;processed_transcript;retained_intron;protein_coding	5.19803	5.1104	5.06858	5.28816	5.48159	5.82658	6.18563	6.47626	6.28638	4.82287e-06	8.84541e-05
ENSG00000185386	MAPK11	ENST00000417877;ENST00000330651;ENST00000495277;ENST00000395764	mitogen-activated protein kinase 11 [Source:HGNC Symbol;Acc:HGNC:6873]	nonsense_mediated_decay;protein_coding;processed_transcript	1.4541	1.37395	1.72265	2.3206	2.23209	2.03243	3.15679	2.81039	2.9633	4.90788e-06	8.94749e-05
ENSG00000101115	SALL4	ENST00000217086;ENST00000483130;ENST00000481363;ENST00000395997	spalt like transcription factor 4 [Source:HGNC Symbol;Acc:HGNC:15924]	protein_coding;processed_transcript	1.22556	1.50624	1.58274	1.79553	1.7626	1.6805	2.41308	2.4251	2.53917	4.90413e-06	8.94749e-05
ENSG00000145284	SCD5	ENST00000319540;ENST00000273908	stearoyl-CoA desaturase 5 [Source:HGNC Symbol;Acc:HGNC:21088]	protein_coding	12.6179	11.0621	12.2464	13.1087	12.7563	12.9567	15.0778	15.6031	14.8173	4.9621e-06	9.02475e-05
ENSG00000181019	NQO1	ENST00000320623;ENST00000439109;ENST00000379046;ENST00000379047;ENST00000569118;ENST00000561500	NAD(P)H quinone dehydrogenase 1 [Source:HGNC Symbol;Acc:HGNC:2874]	protein_coding;retained_intron	157.806	158.47	151.853	172.657	174.124	176.366	175.286	179.319	175.042	5.08257e-06	9.22184e-05
ENSG00000131462	TUBG1	ENST00000681114;ENST00000681919;ENST00000680672;ENST00000251413;ENST00000680678;ENST00000681947;ENST00000588056;ENST00000681490;ENST00000680617;ENST00000679484;ENST00000589688;ENST00000591509	tubulin gamma 1 [Source:HGNC Symbol;Acc:HGNC:12417]	retained_intron;protein_coding;nonsense_mediated_decay	19.3189	18.3082	17.4229	16.7831	16.026	16.0971	14.372	13.2789	14.7396	5.47399e-06	9.78067e-05
ENSG00000165480	SKA3	ENST00000314759;ENST00000298260;ENST00000400018;ENST00000465471;ENST00000475251;ENST00000462482;ENST00000536239	spindle and kinetochore associated complex subunit 3 [Source:HGNC Symbol;Acc:HGNC:20262]	protein_coding;nonsense_mediated_decay;retained_intron	17.311	15.3932	15.9216	15.0393	15.4456	15.2026	12.7706	12.8355	12.0716	5.70554e-06	0.000101114
ENSG00000121152	NCAPH	ENST00000455200;ENST00000240423;ENST00000435975;ENST00000435349;ENST00000477409;ENST00000456906	non-SMC condensin I complex subunit H [Source:HGNC Symbol;Acc:HGNC:1112]	protein_coding;retained_intron	9.78091	9.47996	8.59725	8.14757	7.94995	8.56259	7.17841	6.85546	7.1312	5.98152e-06	0.000105392
ENSG00000163017	ACTG2	ENST00000345517;ENST00000473016;ENST00000409731;ENST00000438902;ENST00000409918;ENST00000468543;ENST00000442912	actin gamma 2, smooth muscle [Source:HGNC Symbol;Acc:HGNC:145]	protein_coding;retained_intron;nonsense_mediated_decay	1.04215	1.03972	0.817565	1.59738	1.36653	1.34453	1.74792	1.81778	2.3003	6.04978e-06	0.000106472
ENSG00000114346	ECT2	ENST00000392692;ENST00000441497;ENST00000437296;ENST00000540509;ENST00000417960;ENST00000232458;ENST00000428567;ENST00000444250;ENST00000486027;ENST00000438041;ENST00000415665;ENST00000366090;ENST00000366254;ENST00000487073;ENST00000460860	epithelial cell transforming 2 [Source:HGNC Symbol;Acc:HGNC:3155]	protein_coding;retained_intron	20.4348	19.7125	18.5098	17.5886	18.1341	19.109	15.607	16.2237	14.0169	6.21775e-06	0.00010905
ENSG00000080031	PTPRH	ENST00000376350;ENST00000263434;ENST00000588370;ENST00000586852;ENST00000586310;ENST00000588559	protein tyrosine phosphatase receptor type H [Source:HGNC Symbol;Acc:HGNC:9672]	protein_coding;processed_transcript	0.239941	0.167273	0.298802	0.390808	0.488917	0.504429	0.828092	0.494475	0.724553	6.61806e-06	0.000115672
ENSG00000160285	LSS	ENST00000356396;ENST00000522411;ENST00000397728;ENST00000474319;ENST00000457828;ENST00000464357;ENST00000419093;ENST00000472272;ENST00000450351;ENST00000484808;ENST00000491729	lanosterol synthase [Source:HGNC Symbol;Acc:HGNC:6708]	protein_coding;retained_intron;processed_transcript	11.2748	11.4173	10.7975	10.123	10.0124	9.55907	9.06686	8.59242	8.52624	7.41754e-06	0.000128613
ENSG00000127946	HIP1	ENST00000336926;ENST00000479835;ENST00000616821;ENST00000404944	huntingtin interacting protein 1 [Source:HGNC Symbol;Acc:HGNC:4913]	protein_coding;processed_transcript;retained_intron	7.47699	7.54508	7.2962	6.40726	6.23152	6.28981	5.799	5.79334	5.96682	7.55893e-06	0.000130619
ENSG00000075415	SLC25A3	ENST00000549338;ENST00000188376;ENST00000552981;ENST00000546766;ENST00000401722;ENST00000551123;ENST00000228318;ENST00000547908;ENST00000548480;ENST00000551265;ENST00000547869;ENST00000547534;ENST00000547444;ENST00000550695	solute carrier family 25 member 3 [Source:HGNC Symbol;Acc:HGNC:10989]	protein_coding;retained_intron;nonsense_mediated_decay	29.6711	29.8295	28.7552	27.1305	28.2581	27.2906	23.9012	23.636	23.967	8.47496e-06	0.000143838
ENSG00000181222	POLR2A	ENST00000674977;ENST00000617998;ENST00000576553;ENST00000576718;ENST00000575547;ENST00000572844;ENST00000576952;ENST00000573603;ENST00000576114;ENST00000574158	RNA polymerase II subunit A [Source:HGNC Symbol;Acc:HGNC:9187]	protein_coding;processed_transcript;retained_intron	69.4179	63.6516	63.5714	60.8406	54.4954	60.6825	55.3263	51.7491	53.7156	8.93618e-06	0.000150994
ENSG00000134291	TMEM106C	ENST00000552561;ENST00000256686;ENST00000449758;ENST00000550552;ENST00000550161;ENST00000551305;ENST00000429772;ENST00000551705;ENST00000549288;ENST00000548640;ENST00000548355;ENST00000548965;ENST00000547136;ENST00000549287;ENST00000615597;ENST00000552187;ENST00000550146	transmembrane protein 106C [Source:HGNC Symbol;Acc:HGNC:28775]	protein_coding;retained_intron;nonsense_mediated_decay	32.3729	32.0181	31.2065	29.4283	28.5157	28.3755	25.2947	25.0836	26.7527	9.2068e-06	0.000154879
ENSG00000115415	STAT1	ENST00000698148;ENST00000673885;ENST00000698143;ENST00000673847;ENST00000409465;ENST00000674081;ENST00000698149;ENST00000392322;ENST00000392323;ENST00000361099;ENST00000673942;ENST00000540176;ENST00000673638;ENST00000452281;ENST00000673832;ENST00000698141;ENST00000673841;ENST00000674080;ENST00000673863;ENST00000673952;ENST00000698150;ENST00000698144;ENST00000673858;ENST00000698142;ENST00000698147…	signal transducer and activator of transcription 1 [Source:HGNC Symbol;Acc:HGNC:11362]	retained_intron;nonsense_mediated_decay;protein_coding;processed_transcript	100.298	97.6915	94.6185	100.245	104.408	104.148	99.2381	106.235	100.797	9.23303e-06	0.000154979
ENSG00000196776	CD47	ENST00000355354;ENST00000471694;ENST00000361309;ENST00000517766;ENST00000398258;ENST00000644850	CD47 molecule [Source:HGNC Symbol;Acc:HGNC:1682]	protein_coding;retained_intron	13.0272	13.1138	12.5744	14.3849	16.1924	14.6	15.1762	16.1442	15.6281	9.46936e-06	0.000158596
ENSG00000177425	PAWR	ENST00000328827;ENST00000551712;ENST00000552637;ENST00000547699;ENST00000547571;ENST00000547016;ENST00000550603;ENST00000548426;ENST00000548075	pro-apoptotic WT1 regulator [Source:HGNC Symbol;Acc:HGNC:8614]	protein_coding;retained_intron;processed_transcript	6.49698	6.13511	6.80722	7.57153	7.7313	7.47896	8.30544	8.53432	7.49105	9.97424e-06	0.000166321
ENSG00000149792	MRPL49	ENST00000526319;ENST00000524482;ENST00000532671;ENST00000279242;ENST00000526171;ENST00000528529;ENST00000533943;ENST00000534078	mitochondrial ribosomal protein L49 [Source:HGNC Symbol;Acc:HGNC:1176]	nonsense_mediated_decay;processed_transcript;retained_intron;protein_coding	42.3783	42.1969	43.5849	41.3533	40.3087	39.9099	34.3057	34.1105	35.8495	1.04119e-05	0.00017305
ENSG00000105486	LIG1	ENST00000594759;ENST00000601091;ENST00000596672;ENST00000699873;ENST00000699877;ENST00000596549;ENST00000263274;ENST00000699879;ENST00000699866;ENST00000699874;ENST00000699878;ENST00000699875;ENST00000427526;ENST00000699869;ENST00000699876;ENST00000597901;ENST00000599322;ENST00000595758;ENST00000594067;ENST00000596332;ENST00000596104;ENST00000699870;ENST00000699880;ENST00000600055;ENST00000699872…	DNA ligase 1 [Source:HGNC Symbol;Acc:HGNC:6598]	nonsense_mediated_decay;protein_coding;retained_intron;processed_transcript	7.82396	7.52881	7.62233	7.39396	6.80665	7.41056	6.16472	6.05805	5.98741	1.11296e-05	0.000183977
ENSG00000215193	PEX26	ENST00000399744;ENST00000329627;ENST00000428061	peroxisomal biogenesis factor 26 [Source:HGNC Symbol;Acc:HGNC:22965]	protein_coding	2.4548	2.65708	2.41956	2.35525	2.19163	2.29397	1.95312	1.98018	1.87717	1.12477e-05	0.000185526
ENSG00000104738	MCM4	ENST00000262105;ENST00000697120;ENST00000697121;ENST00000649838;ENST00000697123;ENST00000648519;ENST00000649973;ENST00000650216;ENST00000518680;ENST00000648554;ENST00000518382;ENST00000520637;ENST00000524086;ENST00000519170;ENST00000521151;ENST00000650327;ENST00000518221;ENST00000648533;ENST00000520994;ENST00000523853;ENST00000649919;ENST00000647877;ENST00000521261;ENST00000648407;ENST00000519138…	minichromosome maintenance complex component 4 [Source:HGNC Symbol;Acc:HGNC:6947]	protein_coding;retained_intron;nonsense_mediated_decay;processed_transcript	24.1864	23.6985	23.0267	22.02	22.9938	21.9567	18.8489	19.2143	19.4341	1.21328e-05	0.000197983
ENSG00000248015	ENSG00000248015	ENST00000501448;ENST00000589734;ENST00000585596;ENST00000650765	novel transcript, antisense to NDUFS7	lncRNA	0.270014	0.219948	0.389904	0.548624	0.441496	0.567993	0.866724	0.699879	0.795486	1.28166e-05	0.000208249
ENSG00000137817	PARP6	ENST00000413097;ENST00000544520;ENST00000260376;ENST00000565443;ENST00000569795;ENST00000566991;ENST00000616176;ENST00000566844;ENST00000287196;ENST00000565999;ENST00000564610;ENST00000567042;ENST00000567974;ENST00000419739;ENST00000567633;ENST00000568213;ENST00000566831;ENST00000569972	poly(ADP-ribose) polymerase family member 6 [Source:HGNC Symbol;Acc:HGNC:26921]	processed_transcript;protein_coding;nonsense_mediated_decay;retained_intron	9.67756	9.07	9.45387	10.029	9.92651	10.21	12.1956	11.1935	11.287	1.3205e-05	0.000213423
ENSG00000105835	NAMPT	ENST00000424768;ENST00000680152;ENST00000681550;ENST00000489732;ENST00000680468;ENST00000222553;ENST00000681372;ENST00000680584;ENST00000354289;ENST00000679643;ENST00000680669;ENST00000681936;ENST00000680129;ENST00000681491;ENST00000441045;ENST00000679894;ENST00000681391;ENST00000680991;ENST00000680616;ENST00000681653;ENST00000463871;ENST00000680786;ENST00000681223;ENST00000491027;ENST00000393618…	nicotinamide phosphoribosyltransferase [Source:HGNC Symbol;Acc:HGNC:30092]	protein_coding;nonsense_mediated_decay;retained_intron;processed_transcript	5.36999	5.79243	5.30427	5.93847	6.76245	6.45333	6.63986	7.06086	6.58369	1.36295e-05	0.00022005
ENSG00000184371	CSF1	ENST00000329608;ENST00000526001;ENST00000357302;ENST00000420111;ENST00000369802	colony stimulating factor 1 [Source:HGNC Symbol;Acc:HGNC:2432]	protein_coding;processed_transcript	1.61942	1.71357	1.63462	2.32837	1.92635	1.87992	2.59039	2.87268	2.85976	1.42057e-05	0.000228627
ENSG00000114405	C3orf14	ENST00000462069;ENST00000542214;ENST00000232519;ENST00000494481;ENST00000465142;ENST00000491323;ENST00000486169	chromosome 3 open reading frame 14 [Source:HGNC Symbol;Acc:HGNC:25024]	protein_coding;retained_intron;processed_transcript	31.1909	31.4927	30.8456	29.6473	29.3003	29.6114	25.1125	26.7151	26.4034	1.54786e-05	0.000246509
ENSG00000176890	TYMS	ENST00000323274;ENST00000323224;ENST00000581920;ENST00000584122;ENST00000579128	thymidylate synthetase [Source:HGNC Symbol;Acc:HGNC:12441]	protein_coding;processed_transcript;retained_intron	20.6565	20.3123	19.9313	18.8789	17.7899	19.9583	14.9964	16.8068	15.4047	1.54786e-05	0.000246509
ENSG00000119711	ALDH6A1	ENST00000553458;ENST00000553814;ENST00000554501;ENST00000350259;ENST00000554231;ENST00000556852;ENST00000555126	aldehyde dehydrogenase 6 family member A1 [Source:HGNC Symbol;Acc:HGNC:7179]	protein_coding;processed_transcript;retained_intron	8.61459	8.16436	7.74748	7.64636	7.81068	7.60645	6.24612	6.35823	6.48876	1.55421e-05	0.000247005
ENSG00000072954	TMEM38A	ENST00000187762;ENST00000595452	transmembrane protein 38A [Source:HGNC Symbol;Acc:HGNC:28462]	protein_coding;retained_intron	1.96427	1.87111	1.50839	2.79426	2.52256	1.9955	3.27337	3.34782	3.4237	1.58776e-05	0.000250509
ENSG00000115685	PPP1R7	ENST00000438799;ENST00000234038;ENST00000272983;ENST00000406106;ENST00000450367;ENST00000401987;ENST00000404405;ENST00000439916;ENST00000467159;ENST00000479821;ENST00000498170;ENST00000485630;ENST00000423280;ENST00000493374;ENST00000491715;ENST00000407025;ENST00000402734;ENST00000427172	protein phosphatase 1 regulatory subunit 7 [Source:HGNC Symbol;Acc:HGNC:9295]	protein_coding;processed_transcript;retained_intron	17.4004	18.1435	16.5053	15.3731	16.6673	16.6596	13.2122	13.2348	14.043	1.61236e-05	0.000253694
ENSG00000075702	WDR62	ENST00000679757;ENST00000587391;ENST00000270301;ENST00000401500;ENST00000680806;ENST00000680349;ENST00000680211;ENST00000679682;ENST00000680590;ENST00000680403;ENST00000679858;ENST00000679422;ENST00000681608;ENST00000681597;ENST00000680359;ENST00000680564;ENST00000680280;ENST00000680597;ENST00000680858;ENST00000680739;ENST00000681302;ENST00000681088;ENST00000378860;ENST00000679357;ENST00000679598…	WD repeat domain 62 [Source:HGNC Symbol;Acc:HGNC:24502]	protein_coding;nonsense_mediated_decay;retained_intron	5.01816	4.62097	4.87782	4.41169	4.33336	4.5672	3.78892	3.67091	3.83003	1.63788e-05	0.00025682
ENSG00000189067	LITAF	ENST00000413364;ENST00000339430;ENST00000574848;ENST00000570904;ENST00000571688;ENST00000622633;ENST00000573332;ENST00000574701;ENST00000571976;ENST00000571459;ENST00000576036;ENST00000576334;ENST00000574703;ENST00000574763;ENST00000575426;ENST00000571277;ENST00000572255;ENST00000570798	lipopolysaccharide induced TNF factor [Source:HGNC Symbol;Acc:HGNC:16841]	protein_coding;nonsense_mediated_decay	32.0916	30.3402	30.3306	32.3045	33.6275	33.8142	35.5615	39.3115	37.5676	1.64891e-05	0.000257754
ENSG00000198910	L1CAM	ENST00000361981;ENST00000370055;ENST00000420165;ENST00000370058;ENST00000439496;ENST00000484652;ENST00000370060;ENST00000491983;ENST00000407935;ENST00000458029;ENST00000474853;ENST00000455590;ENST00000496122;ENST00000616195	L1 cell adhesion molecule [Source:HGNC Symbol;Acc:HGNC:6470]	protein_coding;retained_intron;processed_transcript	5.91141	5.52596	5.55395	6.56148	5.88007	6.37329	7.96911	6.79812	6.84444	1.71627e-05	0.000266915
ENSG00000154914	USP43	ENST00000570827;ENST00000570475;ENST00000285199;ENST00000574408;ENST00000573955	ubiquitin specific peptidase 43 [Source:HGNC Symbol;Acc:HGNC:20072]	processed_transcript;protein_coding	3.86654	3.8423	4.15788	5.16685	4.85857	4.64749	5.41767	5.35703	4.99249	1.72814e-05	0.00026794
ENSG00000168003	SLC3A2	ENST00000541425;ENST00000338663;ENST00000680002;ENST00000535296;ENST00000681232;ENST00000680610;ENST00000377889;ENST00000681563;ENST00000681657;ENST00000680654;ENST00000538084;ENST00000680729;ENST00000680134;ENST00000680297;ENST00000679594;ENST00000377890;ENST00000377891;ENST00000681215;ENST00000679908;ENST00000539891;ENST00000542922;ENST00000535768;ENST00000538682;ENST00000680725;ENST00000700482…	solute carrier family 3 member 2 [Source:HGNC Symbol;Acc:HGNC:11026]	nonsense_mediated_decay;protein_coding;retained_intron;processed_transcript	59.6564	58.569	59.1811	66.1487	61.8054	63.5061	68.1864	68.9372	68.2341	1.77869e-05	0.000274939
ENSG00000179388	EGR3	ENST00000317216;ENST00000519492;ENST00000518773;ENST00000524088;ENST00000522910	early growth response 3 [Source:HGNC Symbol;Acc:HGNC:3240]	protein_coding;processed_transcript	10.4045	9.79136	9.95642	9.23927	8.36973	9.03943	7.48543	7.80409	8.13047	1.80778e-05	0.000278871
ENSG00000169629	RGPD8	ENST00000302558;ENST00000409750;ENST00000482903;ENST00000471422;ENST00000522286	RANBP2 like and GRIP domain containing 8 [Source:HGNC Symbol;Acc:HGNC:9849]	protein_coding;retained_intron;nonsense_mediated_decay	2.05392	2.08445	2.16533	2.96394	3.04624	2.84832	2.16917	2.55392	2.45261	1.94036e-05	0.000297516
ENSG00000160182	TFF1	ENST00000291527	trefoil factor 1 [Source:HGNC Symbol;Acc:HGNC:11755]	protein_coding	1748.9	2149.83	2087.46	1864.57	1736.9	1696.39	1601.79	1482.88	1659.67	1.96388e-05	0.000300819
ENSG00000047346	FAM214A	ENST00000399202;ENST00000261844;ENST00000566948;ENST00000534964;ENST00000619572;ENST00000566768;ENST00000568871;ENST00000546305;ENST00000570204;ENST00000568863;ENST00000562351;ENST00000561543;ENST00000568637;ENST00000568668;ENST00000562135	family with sequence similarity 214 member A [Source:HGNC Symbol;Acc:HGNC:25609]	protein_coding;retained_intron;nonsense_mediated_decay	6.47826	5.96277	6.43304	6.8196	6.54385	6.86713	7.89681	7.84676	7.36893	2.03164e-05	0.000310263
ENSG00000057019	DCBLD2	ENST00000326840;ENST00000470393;ENST00000479144;ENST00000496736;ENST00000494614;ENST00000449482;ENST00000460008;ENST00000326857	discoidin, CUB and LCCL domain containing 2 [Source:HGNC Symbol;Acc:HGNC:24627]	protein_coding;retained_intron	2.84868	3.09384	2.79393	2.62996	2.75113	2.74331	2.06088	2.37503	2.14799	2.04349e-05	0.00031176
ENSG00000198146	ZNF770	ENST00000356321;ENST00000559564	zinc finger protein 770 [Source:HGNC Symbol;Acc:HGNC:26061]	protein_coding	5.48169	6.11891	5.84188	6.71807	6.84045	6.5232	7.18125	8.12203	7.0118	2.05678e-05	0.000313474
ENSG00000164576	SAP30L	ENST00000297109;ENST00000440364;ENST00000519683;ENST00000520159;ENST00000520731;ENST00000523198;ENST00000517926;ENST00000523029;ENST00000426761	SAP30 like [Source:HGNC Symbol;Acc:HGNC:25663]	protein_coding;retained_intron;processed_transcript	2.74508	2.6131	2.59384	2.96547	2.88799	2.90647	3.71834	3.78123	3.43293	2.08734e-05	0.000317497
ENSG00000205189	ZBTB10	ENST00000426744;ENST00000430430;ENST00000379091;ENST00000455036	zinc finger and BTB domain containing 10 [Source:HGNC Symbol;Acc:HGNC:30953]	protein_coding	3.12804	2.8213	3.21684	3.55372	3.40467	3.2644	3.57878	4.36201	4.04095	2.23207e-05	0.000337825
ENSG00000116096	SPR	ENST00000234454;ENST00000498749	sepiapterin reductase [Source:HGNC Symbol;Acc:HGNC:11257]	protein_coding;processed_transcript	30.4622	32.018	31.5403	29.352	30.3819	28.3537	25.7355	23.8714	23.8566	2.24164e-05	0.0003386
ENSG00000099365	STX1B	ENST00000215095;ENST00000565419;ENST00000566211	syntaxin 1B [Source:HGNC Symbol;Acc:HGNC:18539]	protein_coding;retained_intron	0.406917	0.36369	0.318888	0.496056	0.475097	0.459148	0.771508	0.718693	0.755792	2.38929e-05	0.000358417
ENSG00000171310	CHST11	ENST00000549260;ENST00000303694;ENST00000546689;ENST00000547956;ENST00000550711	carbohydrate sulfotransferase 11 [Source:HGNC Symbol;Acc:HGNC:17422]	protein_coding;processed_transcript	4.29274	4.03211	3.90855	4.8813	4.69377	4.63993	4.92282	5.25001	5.45011	2.43607e-05	0.000364359
ENSG00000111669	TPI1	ENST00000229270;ENST00000535434;ENST00000613953;ENST00000396705;ENST00000493987;ENST00000488464;ENST00000495834;ENST00000482209;ENST00000462761;ENST00000474253	triosephosphate isomerase 1 [Source:HGNC Symbol;Acc:HGNC:12009]	protein_coding;retained_intron	321.205	336.355	332.352	308.51	293.332	286.472	288.424	282.744	295.413	2.50508e-05	0.000373238
ENSG00000204568	MRPS18B	ENST00000472229;ENST00000259873;ENST00000492316;ENST00000472267	mitochondrial ribosomal protein S18B [Source:HGNC Symbol;Acc:HGNC:14516]	processed_transcript;protein_coding;retained_intron	55.8709	59.9154	58.514	51.6082	51.1292	54.554	45.7457	47.8671	44.4187	2.50883e-05	0.000373337
ENSG00000262094	ENSG00000262094	ENST00000573737;ENST00000575205;ENST00000574098;ENST00000570366	novel transcript	lncRNA	0.298006	0.392716	0.286832	0.531043	0.513807	0.659898	0.844805	0.793563	1.0408	2.51079e-05	0.000373337
ENSG00000113739	STC2	ENST00000265087;ENST00000520648;ENST00000520593;ENST00000519511;ENST00000518455	stanniocalcin 2 [Source:HGNC Symbol;Acc:HGNC:11374]	protein_coding;processed_transcript;retained_intron	24.145	26.0653	24.2863	29.7608	25.6038	27.0898	31.9202	29.2002	30.7416	2.53527e-05	0.000376242
ENSG00000163625	WDFY3	ENST00000295888;ENST00000426414;ENST00000504839;ENST00000509825;ENST00000505923;ENST00000514711;ENST00000514071;ENST00000504990;ENST00000425179;ENST00000502713;ENST00000512267;ENST00000509172	WD repeat and FYVE domain containing 3 [Source:HGNC Symbol;Acc:HGNC:20751]	protein_coding;retained_intron;processed_transcript	4.61345	4.55289	4.48186	4.29685	4.22354	4.48636	3.73096	3.69428	3.5831	2.61829e-05	0.000386306
ENSG00000123064	DDX54	ENST00000306014;ENST00000314045;ENST00000548786;ENST00000551344;ENST00000546869;ENST00000549271;ENST00000550016;ENST00000546898;ENST00000551912	DEAD-box helicase 54 [Source:HGNC Symbol;Acc:HGNC:20084]	protein_coding;retained_intron;nonsense_mediated_decay;processed_transcript	31.7347	33.6134	32.1067	31.7991	30.143	30.2563	26.615	26.0674	26.7278	2.76847e-05	0.000406888
ENSG00000107959	PITRM1	ENST00000677305;ENST00000676953;ENST00000678855;ENST00000380989;ENST00000678050;ENST00000678601;ENST00000677922;ENST00000678436;ENST00000224949;ENST00000678987;ENST00000678370;ENST00000677598;ENST00000678756;ENST00000678811;ENST00000678539;ENST00000424714;ENST00000464395;ENST00000677384;ENST00000678972;ENST00000679210;ENST00000380994;ENST00000451104;ENST00000488065;ENST00000455371;ENST00000677181…	pitrilysin metallopeptidase 1 [Source:HGNC Symbol;Acc:HGNC:17663]	nonsense_mediated_decay;protein_coding;retained_intron;processed_transcript	8.87973	9.02395	8.7247	8.45615	7.95337	8.26776	7.37149	7.35608	7.06657	2.78709e-05	0.000408443
ENSG00000104823	ECH1	ENST00000601060;ENST00000594391;ENST00000221418;ENST00000601094;ENST00000602115;ENST00000598707;ENST00000595470;ENST00000597089;ENST00000600178;ENST00000595567;ENST00000596118;ENST00000597805;ENST00000601333;ENST00000598316;ENST00000594164	enoyl-CoA hydratase 1 [Source:HGNC Symbol;Acc:HGNC:3149]	retained_intron;protein_coding;processed_transcript;nonsense_mediated_decay	59.4768	64.6864	61.9754	66.4354	66.4427	63.6199	75.1402	74.4741	73.3364	2.82619e-05	0.000413775
ENSG00000117118	SDHB	ENST00000485515;ENST00000375499;ENST00000491274;ENST00000475506;ENST00000466613;ENST00000475049;ENST00000485092	succinate dehydrogenase complex iron sulfur subunit B [Source:HGNC Symbol;Acc:HGNC:10681]	processed_transcript;protein_coding;retained_intron	29.4868	33.2601	32.1841	29.9586	29.9829	29.1189	24.444	23.7979	26.1443	2.89385e-05	0.000422464
ENSG00000150347	ARID5B	ENST00000309334;ENST00000279873;ENST00000644638	AT-rich interaction domain 5B [Source:HGNC Symbol;Acc:HGNC:17362]	protein_coding	5.95958	5.01475	5.00575	6.12345	5.8864	6.03658	6.91362	6.66028	6.7095	2.91443e-05	0.000424654
ENSG00000132313	MRPL35	ENST00000254644;ENST00000337109;ENST00000409180;ENST00000605125	mitochondrial ribosomal protein L35 [Source:HGNC Symbol;Acc:HGNC:14489]	protein_coding	10.4529	10.8469	10.5751	9.63486	10.2269	10.3811	8.28081	8.52931	8.32267	2.93628e-05	0.000427429
ENSG00000124145	SDC4	ENST00000372733	syndecan 4 [Source:HGNC Symbol;Acc:HGNC:10661]	protein_coding	63.7697	70.2521	68.8765	74.2175	69.5832	71.2023	82.8185	79.8694	82.1353	2.9554e-05	0.000429802
ENSG00000100867	DHRS2	ENST00000344777;ENST00000556729;ENST00000556701;ENST00000250383;ENST00000611765;ENST00000553896;ENST00000557535;ENST00000556550;ENST00000553600;ENST00000432832	dehydrogenase/reductase 2 [Source:HGNC Symbol;Acc:HGNC:18349]	protein_coding;retained_intron;processed_transcript	2.35155	2.87974	2.68801	3.61537	3.87278	3.37896	3.20697	3.225	3.22589	3.00676e-05	0.000435609
ENSG00000104856	RELB	ENST00000221452;ENST00000505236;ENST00000509229;ENST00000509480;ENST00000589972;ENST00000510184	RELB proto-oncogene, NF-kB subunit [Source:HGNC Symbol;Acc:HGNC:9956]	protein_coding;retained_intron;nonsense_mediated_decay	2.74795	2.52364	2.36959	2.919	3.31235	3.12776	4.14987	4.22206	4.28447	3.06153e-05	0.000441863
ENSG00000254772	EEF1G	ENST00000525340;ENST00000524420;ENST00000329251;ENST00000532986	eukaryotic translation elongation factor 1 gamma [Source:HGNC Symbol;Acc:HGNC:3213]	retained_intron;processed_transcript;protein_coding	449.225	458.707	437.188	426.583	427.804	399.142	390.992	399.081	406.212	3.1295e-05	0.000449545
ENSG00000135241	PNPLA8	ENST00000422087;ENST00000453144;ENST00000257694;ENST00000436062;ENST00000462466;ENST00000483879;ENST00000476592;ENST00000489738;ENST00000453085;ENST00000415498	patatin like phospholipase domain containing 8 [Source:HGNC Symbol;Acc:HGNC:28900]	protein_coding;retained_intron;processed_transcript	6.59334	6.47227	6.76163	6.78741	7.58495	7.05473	8.40318	8.45854	7.87655	3.19743e-05	0.000457148
ENSG00000143412	ANXA9	ENST00000368947;ENST00000474997	annexin A9 [Source:HGNC Symbol;Acc:HGNC:547]	protein_coding;processed_transcript	37.4875	36.3456	35.9039	44.7154	42.7173	45.3081	41.8431	40.8658	43.034	3.30302e-05	0.00047004
ENSG00000143799	PARP1	ENST00000678781;ENST00000366794;ENST00000498787;ENST00000491816;ENST00000366790;ENST00000490921;ENST00000677884;ENST00000676565;ENST00000468608;ENST00000676685;ENST00000678560;ENST00000678288;ENST00000676709;ENST00000463968;ENST00000677815;ENST00000679276;ENST00000677374	poly(ADP-ribose) polymerase 1 [Source:HGNC Symbol;Acc:HGNC:270]	retained_intron;protein_coding;nonsense_mediated_decay	11.2115	10.9557	10.6893	10.0842	10.1763	10.1165	8.92118	8.98333	8.9855	3.62137e-05	0.000509633
ENSG00000124766	SOX4	ENST00000244745	SRY-box transcription factor 4 [Source:HGNC Symbol;Acc:HGNC:11200]	protein_coding	17.8806	19.5297	20.1803	21.9527	20.9708	20.887	23.8396	23.3908	22.4978	3.64807e-05	0.000511973
ENSG00000115548	KDM3A	ENST00000441719;ENST00000409064;ENST00000312912;ENST00000470160;ENST00000466058;ENST00000485171;ENST00000427678;ENST00000491383;ENST00000488971;ENST00000462197;ENST00000483866;ENST00000452034;ENST00000409556;ENST00000498528;ENST00000463013	lysine demethylase 3A [Source:HGNC Symbol;Acc:HGNC:20815]	nonsense_mediated_decay;protein_coding;retained_intron;processed_transcript	6.74034	7.17535	6.64728	7.73996	7.59291	8.05151	8.71172	8.01019	7.84348	3.72599e-05	0.000520989
ENSG00000187608	ISG15	ENST00000649529;ENST00000624697;ENST00000624652	ISG15 ubiquitin like modifier [Source:HGNC Symbol;Acc:HGNC:4053]	protein_coding	656.494	706.203	702.197	651.865	653.149	626.135	557.694	563.624	605.927	4.00272e-05	0.0005551
ENSG00000275464	ENSG00000275464	ENST00000617716	novel protein, similar to PWP2 periodic tryptophan protein homolog (yeast) PWP2	artifact	12.9289	11.5185	10.9535	10.2431	10.4997	10.5153	9.12608	9.25571	8.79381	4.02504e-05	0.000557687
ENSG00000170234	PWWP2A	ENST00000456329;ENST00000307063;ENST00000523662;ENST00000524050;ENST00000521424;ENST00000520662	PWWP domain containing 2A [Source:HGNC Symbol;Acc:HGNC:29406]	protein_coding;nonsense_mediated_decay;processed_transcript	4.37653	4.42444	4.09044	3.84064	4.06963	3.86845	3.22409	3.35585	3.03186	4.03051e-05	0.000557938
ENSG00000149925	ALDOA	ENST00000642816;ENST00000562168;ENST00000564521;ENST00000563060;ENST00000643777;ENST00000412304;ENST00000569798;ENST00000569545;ENST00000566846;ENST00000566146;ENST00000395240;ENST00000566130;ENST00000563987;ENST00000562302;ENST00000562679;ENST00000566012;ENST00000567555	aldolase, fructose-bisphosphate A [Source:HGNC Symbol;Acc:HGNC:414]	protein_coding;retained_intron;processed_transcript	1213.89	1105.5	1128.73	1060.02	1001.64	1022.05	1055.57	987.677	1090.94	4.05395e-05	0.000560165
ENSG00000140105	WARS1	ENST00000557135;ENST00000555031;ENST00000556645;ENST00000344102;ENST00000553808;ENST00000358655;ENST00000392882;ENST00000557297;ENST00000554605;ENST00000355338;ENST00000554950;ENST00000553934;ENST00000556579;ENST00000553581;ENST00000557347;ENST00000557722;ENST00000556435;ENST00000556338;ENST00000554601;ENST00000554772;ENST00000553769;ENST00000557614;ENST00000554509;ENST00000556295;ENST00000555063…	tryptophanyl-tRNA synthetase 1 [Source:HGNC Symbol;Acc:HGNC:12729]	protein_coding;retained_intron;nonsense_mediated_decay;processed_transcript	56.2947	55.6604	57.8509	62.4188	61.0009	64.0304	65.4182	67.6253	63.4108	4.09723e-05	0.000565633
ENSG00000161016	RPL8	ENST00000525232;ENST00000528957;ENST00000529920;ENST00000532702;ENST00000526668;ENST00000262584;ENST00000394920;ENST00000533397;ENST00000531767;ENST00000529163;ENST00000531975;ENST00000534781	ribosomal protein L8 [Source:HGNC Symbol;Acc:HGNC:10368]	retained_intron;protein_coding;nonsense_mediated_decay;processed_transcript	619.953	654.755	668.365	614.45	593.944	593.645	572.594	560.294	596.408	4.16973e-05	0.00057253
ENSG00000115919	KYNU	ENST00000264170;ENST00000409512;ENST00000375773;ENST00000621320;ENST00000410015;ENST00000612147;ENST00000460143;ENST00000613664;ENST00000424385	kynureninase [Source:HGNC Symbol;Acc:HGNC:6469]	protein_coding;retained_intron;nonsense_mediated_decay	7.89492	8.37142	7.8629	9.09014	9.40404	8.95036	9.23151	10.242	9.57479	4.37786e-05	0.000598412
ENSG00000175175	PPM1E	ENST00000308249	protein phosphatase, Mg2+/Mn2+ dependent 1E [Source:HGNC Symbol;Acc:HGNC:19322]	protein_coding	3.37885	3.37401	2.94747	3.76953	3.85664	4.22423	4.58385	4.3308	3.95538	4.39781e-05	0.000600062
ENSG00000161267	BDH1	ENST00000392378;ENST00000392379;ENST00000479425;ENST00000651856;ENST00000495285;ENST00000468710;ENST00000441275;ENST00000483920;ENST00000476764;ENST00000492681;ENST00000434143;ENST00000477015;ENST00000446746;ENST00000445160;ENST00000432819;ENST00000455876;ENST00000358186	3-hydroxybutyrate dehydrogenase 1 [Source:HGNC Symbol;Acc:HGNC:1027]	protein_coding;retained_intron;nonsense_mediated_decay;processed_transcript	4.53403	4.57958	4.58283	4.22216	4.27205	4.07047	3.39779	3.63741	3.64413	4.56769e-05	0.000621573
ENSG00000162430	SELENON	ENST00000361547;ENST00000374315;ENST00000354177;ENST00000494537	selenoprotein N [Source:HGNC Symbol;Acc:HGNC:15999]	protein_coding;nonsense_mediated_decay	17.4636	16.4289	16.7061	15.5722	14.3258	15.7482	13.209	13.8745	13.1198	5.00059e-05	0.000675656
ENSG00000186340	THBS2	ENST00000617924;ENST00000366787;ENST00000676760;ENST00000472733;ENST00000676628;ENST00000649844;ENST00000461848	thrombospondin 2 [Source:HGNC Symbol;Acc:HGNC:11786]	protein_coding;processed_transcript	0.664993	0.659216	0.136322	0.100654	0.188891	0.116168	0.141523	0.0464557	0.00907548	5.01534e-05	0.000676619
ENSG00000128245	YWHAH	ENST00000471374;ENST00000248975;ENST00000397492;ENST00000443669;ENST00000420430	tyrosine 3-monooxygenase/tryptophan 5-monooxygenase activation protein eta [Source:HGNC Symbol;Acc:HGNC:12853]	processed_transcript;protein_coding;nonsense_mediated_decay	41.3692	43.111	44.0203	42.1212	40.6693	39.0085	35.4926	34.6753	33.3273	5.0166e-05	0.000676619
ENSG00000030419	IKZF2	ENST00000434687;ENST00000451136;ENST00000342002;ENST00000412444;ENST00000374319;ENST00000442445;ENST00000452786;ENST00000439848;ENST00000457361;ENST00000484040;ENST00000433134;ENST00000453575	IKAROS family zinc finger 2 [Source:HGNC Symbol;Acc:HGNC:13177]	protein_coding;nonsense_mediated_decay;retained_intron	1.5053	1.28116	1.27032	1.45013	1.71182	1.51364	1.96833	2.03266	1.78508	5.09544e-05	0.000686039
ENSG00000105523	FAM83E	ENST00000263266;ENST00000595110;ENST00000593772;ENST00000599126	family with sequence similarity 83 member E [Source:HGNC Symbol;Acc:HGNC:25972]	protein_coding;processed_transcript	1.19786	1.41871	1.35678	1.66366	1.67522	1.48841	2.38196	2.43908	2.05863	5.13376e-05	0.000689979
ENSG00000198624	CCDC69	ENST00000355417;ENST00000519448;ENST00000519740;ENST00000522179;ENST00000524344;ENST00000521308;ENST00000522964	coiled-coil domain containing 69 [Source:HGNC Symbol;Acc:HGNC:24487]	protein_coding;retained_intron;processed_transcript;nonsense_mediated_decay	3.36457	3.02099	3.17344	1.9787	2.23889	2.20923	2.17899	2.05089	2.21673	5.20281e-05	0.000698577
ENSG00000138640	FAM13A	ENST00000503556;ENST00000395002;ENST00000508369;ENST00000504229;ENST00000507352;ENST00000506913;ENST00000511623;ENST00000502459;ENST00000513837;ENST00000264344;ENST00000502914;ENST00000511573;ENST00000506433;ENST00000508360;ENST00000509094;ENST00000515600;ENST00000509478;ENST00000512339	family with sequence similarity 13 member A [Source:HGNC Symbol;Acc:HGNC:19367]	protein_coding;retained_intron;nonsense_mediated_decay;processed_transcript	0.678707	0.624043	0.584616	0.841541	0.738521	0.841778	0.99014	1.0333	0.987814	5.24115e-05	0.000701937
ENSG00000165731	RET	ENST00000340058;ENST00000683007;ENST00000355710;ENST00000683872;ENST00000615310;ENST00000671844;ENST00000683278;ENST00000640619;ENST00000498820;ENST00000684216;ENST00000638465	ret proto-oncogene [Source:HGNC Symbol;Acc:HGNC:9967]	protein_coding;retained_intron;nonsense_mediated_decay	30.9681	29.6614	29.1533	27.6549	26.8378	27.5744	23.565	25.3251	24.2901	5.361e-05	0.000715473
ENSG00000257671	KRT7-AS	ENST00000546686	KRT7 antisense RNA 1 [Source:HGNC Symbol;Acc:HGNC:52643]	lncRNA	1.28456	2.00984	2.03443	1.76025	2.40543	3.16143	3.74928	3.80174	4.14962	5.38829e-05	0.00071723
ENSG00000087586	AURKA	ENST00000395911;ENST00000312783;ENST00000395914;ENST00000395915;ENST00000347343;ENST00000456249;ENST00000395907;ENST00000420474;ENST00000395913;ENST00000371356;ENST00000451915;ENST00000441357;ENST00000422322	aurora kinase A [Source:HGNC Symbol;Acc:HGNC:11393]	protein_coding	47.0138	45.5324	45.5788	40.5076	40.117	42.0628	36.4082	39.1553	37.5788	5.45817e-05	0.000725898
ENSG00000239306	RBM14	ENST00000393979;ENST00000310137;ENST00000512283;ENST00000409372;ENST00000461478;ENST00000496694;ENST00000409738;ENST00000443702;ENST00000460762	RNA binding motif protein 14 [Source:HGNC Symbol;Acc:HGNC:14219]	protein_coding;processed_transcript	16.041	16.1283	17.1212	15.8655	14.9241	15.3476	13.624	13.1729	13.3737	5.48143e-05	0.000728356
ENSG00000185658	BRWD1	ENST00000341322;ENST00000342449;ENST00000333229;ENST00000470108;ENST00000445245;ENST00000380800;ENST00000473813;ENST00000496759;ENST00000455867;ENST00000484090;ENST00000412604;ENST00000491564	bromodomain and WD repeat domain containing 1 [Source:HGNC Symbol;Acc:HGNC:12760]	protein_coding;processed_transcript;nonsense_mediated_decay;retained_intron	5.31467	5.54376	5.53188	5.90847	6.38277	6.34151	6.55451	6.41093	6.14314	5.6232e-05	0.000745245
ENSG00000112715	VEGFA	ENST00000497139;ENST00000230480;ENST00000372067;ENST00000480614;ENST00000672860;ENST00000425836;ENST00000476772;ENST00000372064;ENST00000523950;ENST00000372077;ENST00000520948;ENST00000413642;ENST00000518538;ENST00000512683;ENST00000417285;ENST00000518689;ENST00000493786;ENST00000519767	vascular endothelial growth factor A [Source:HGNC Symbol;Acc:HGNC:12680]	retained_intron;protein_coding	5.29565	5.47055	5.41692	6.31683	5.52128	5.84	6.88943	6.2398	6.73009	5.63628e-05	0.000746329
ENSG00000081479	LRP2	ENST00000649046;ENST00000443831;ENST00000493501;ENST00000491228	LDL receptor related protein 2 [Source:HGNC Symbol;Acc:HGNC:6694]	protein_coding;retained_intron	0.171184	0.137429	0.121175	0.225754	0.270372	0.219183	0.297853	0.286125	0.271692	5.76589e-05	0.000760847
ENSG00000179091	CYC1	ENST00000533444;ENST00000318911;ENST00000528618;ENST00000525122	cytochrome c1 [Source:HGNC Symbol;Acc:HGNC:2579]	retained_intron;protein_coding	83.5693	88.4529	88.1885	84.697	79.426	76.2382	70.4789	68.2106	71.0411	5.88619e-05	0.000773375
ENSG00000231806	PCAT7	ENST00000644721;ENST00000452148;ENST00000647389	prostate cancer associated transcript 7 [Source:HGNC Symbol;Acc:HGNC:48824]	lncRNA	0.725028	0.72336	0.65773	0.967965	0.940036	0.915288	1.19821	1.14452	1.42067	5.95155e-05	0.000779673
ENSG00000148484	RSU1	ENST00000602389;ENST00000377921;ENST00000345264;ENST00000464074;ENST00000377911	Ras suppressor protein 1 [Source:HGNC Symbol;Acc:HGNC:10464]	protein_coding;processed_transcript	13.5102	13.6133	12.4355	11.1876	11.7321	11.583	9.77405	10.4173	10.5074	6.39103e-05	0.000824773
ENSG00000052344	PRSS8	ENST00000317508;ENST00000567531;ENST00000567833;ENST00000568261;ENST00000564025;ENST00000567797	serine protease 8 [Source:HGNC Symbol;Acc:HGNC:9491]	protein_coding;retained_intron	85.0566	82.7825	92.1627	99.3828	94.3533	95.9251	106.759	101.723	101.818	6.46162e-05	0.000831858
ENSG00000168496	FEN1	ENST00000305885;ENST00000535307;ENST00000535723	flap structure-specific endonuclease 1 [Source:HGNC Symbol;Acc:HGNC:3650]	protein_coding	39.3696	42.332	41.6732	38.383	37.0761	37.7808	33.3869	32.0115	33.3019	6.4623e-05	0.000831858
ENSG00000160179	ABCG1	ENST00000472587;ENST00000343687;ENST00000361802;ENST00000398449;ENST00000450121;ENST00000496783;ENST00000398457;ENST00000467818	ATP binding cassette subfamily G member 1 [Source:HGNC Symbol;Acc:HGNC:73]	retained_intron;protein_coding	13.3607	12.9875	13.0459	15.2182	14.6758	14.8413	15.6305	15.0995	16.1079	6.56005e-05	0.000842306
ENSG00000158258	CLSTN2	ENST00000458420;ENST00000511524	calsyntenin 2 [Source:HGNC Symbol;Acc:HGNC:17448]	protein_coding;retained_intron	1.64337	1.69658	1.52577	1.14377	1.11572	1.23714	1.5041	1.48811	1.47393	6.61108e-05	0.000848144
ENSG00000182551	ADI1	ENST00000382093;ENST00000327435;ENST00000415131	acireductone dioxygenase 1 [Source:HGNC Symbol;Acc:HGNC:30576]	protein_coding	11.8328	12.825	12.7692	10.5887	10.8709	11.3542	9.55239	10.0911	9.78308	7.02633e-05	0.000895388
ENSG00000261609	GAN	ENST00000648994;ENST00000648349;ENST00000674788;ENST00000567335	gigaxonin [Source:HGNC Symbol;Acc:HGNC:4137]	protein_coding;nonsense_mediated_decay;retained_intron;processed_transcript	2.47258	2.17053	2.24679	2.76927	2.80723	2.84331	2.3579	2.50228	2.50495	7.02084e-05	0.000895388
ENSG00000126522	ASL	ENST00000395332;ENST00000304874;ENST00000671817;ENST00000673518;ENST00000362000;ENST00000380839;ENST00000673350;ENST00000395331;ENST00000487982;ENST00000672498;ENST00000496336;ENST00000493708;ENST00000464970;ENST00000672676;ENST00000673594;ENST00000672586	argininosuccinate lyase [Source:HGNC Symbol;Acc:HGNC:746]	protein_coding;retained_intron;nonsense_mediated_decay	5.15997	5.43924	5.18265	4.09021	4.72355	4.3038	4.0011	4.0586	4.02943	7.12139e-05	0.000905785
ENSG00000169689	CENPX	ENST00000583767;ENST00000584347;ENST00000580090;ENST00000580435;ENST00000584600;ENST00000392359;ENST00000306704;ENST00000577379;ENST00000584514;ENST00000585091;ENST00000579520	centromere protein X [Source:HGNC Symbol;Acc:HGNC:11422]	processed_transcript;protein_coding;retained_intron	23.4321	21.0288	21.986	20.0105	18.1856	17.2972	16.7819	16.1472	17.6957	7.57115e-05	0.000957609
ENSG00000132646	PCNA	ENST00000379143;ENST00000379160	proliferating cell nuclear antigen [Source:HGNC Symbol;Acc:HGNC:8729]	protein_coding	112.429	118.415	113.407	106.854	110.028	102.211	94.1037	93.313	93.7971	7.68235e-05	0.000968459
ENSG00000078081	LAMP3	ENST00000265598;ENST00000470251	lysosomal associated membrane protein 3 [Source:HGNC Symbol;Acc:HGNC:14582]	protein_coding	5.75179	4.73578	4.82461	5.54959	5.6131	6.30494	7.19424	7.13998	6.61682	7.67888e-05	0.000968459
ENSG00000143320	CRABP2	ENST00000368221;ENST00000368222;ENST00000621784;ENST00000368220	cellular retinoic acid binding protein 2 [Source:HGNC Symbol;Acc:HGNC:2339]	protein_coding	183.147	175.764	170.423	166.135	157.677	154.712	144.167	140.329	146.597	7.79876e-05	0.000979085
ENSG00000137547	MRPL15	ENST00000260102;ENST00000519831;ENST00000522521	mitochondrial ribosomal protein L15 [Source:HGNC Symbol;Acc:HGNC:14054]	protein_coding	23.6129	24.2382	23.7174	22.4133	21.6146	21.7509	18.7789	17.2044	20.0166	7.94033e-05	0.000995219
ENSG00000107798	LIPA	ENST00000371837;ENST00000336233;ENST00000456827;ENST00000463623;ENST00000487618;ENST00000428800;ENST00000489359	lipase A, lysosomal acid type [Source:HGNC Symbol;Acc:HGNC:6617]	protein_coding;processed_transcript	13.9809	13.9577	13.2426	15.4693	15.376	14.6447	16.4201	18.0799	15.8917	8.23484e-05	0.00102539
ENSG00000174243	DDX23	ENST00000703179;ENST00000551098;ENST00000552369;ENST00000308025;ENST00000547290;ENST00000703181;ENST00000703180;ENST00000549795;ENST00000547165;ENST00000551331;ENST00000703182;ENST00000547842;ENST00000552069;ENST00000551189;ENST00000552555;ENST00000703178;ENST00000552802;ENST00000552512;ENST00000547135;ENST00000553182;ENST00000551468;ENST00000553065	DEAD-box helicase 23 [Source:HGNC Symbol;Acc:HGNC:17347]	protein_coding;retained_intron;nonsense_mediated_decay;processed_transcript	41.9343	39.6995	40.6429	37.475	35.6152	37.5292	33.4712	34.2033	33.351	8.38449e-05	0.00104317
ENSG00000156398	SFXN2	ENST00000369893;ENST00000459894;ENST00000602647;ENST00000602764;ENST00000602287;ENST00000602660;ENST00000602868;ENST00000602544;ENST00000602785;ENST00000602831;ENST00000602439;ENST00000602670;ENST00000480358	sideroflexin 2 [Source:HGNC Symbol;Acc:HGNC:16086]	protein_coding;nonsense_mediated_decay;retained_intron;processed_transcript	5.2606	5.56028	5.56729	4.78797	4.59965	4.60257	4.54534	4.27801	4.23233	8.65686e-05	0.00107268
ENSG00000140534	TICRR	ENST00000560985;ENST00000561095;ENST00000268138	TOPBP1 interacting checkpoint and replication regulator [Source:HGNC Symbol;Acc:HGNC:28704]	protein_coding;nonsense_mediated_decay	4.58726	4.20428	4.49398	4.3283	4.0809	4.06094	3.40377	3.58059	3.52065	9.05232e-05	0.00111623
ENSG00000129295	DNAAF11	ENST00000620350;ENST00000523503;ENST00000522597;ENST00000522789;ENST00000519085;ENST00000520446;ENST00000518101;ENST00000250173;ENST00000518642;ENST00000519595;ENST00000521430	dynein axonemal assembly factor 11 [Source:HGNC Symbol;Acc:HGNC:16725]	protein_coding;processed_transcript;retained_intron	0.511824	0.465638	0.455195	0.566682	0.628296	0.649997	0.929699	0.916152	0.946736	9.09307e-05	0.00112035
ENSG00000110975	SYT10	ENST00000539102;ENST00000228567;ENST00000567656	synaptotagmin 10 [Source:HGNC Symbol;Acc:HGNC:19266]	nonsense_mediated_decay;protein_coding;processed_transcript	3.48433	3.91538	3.68892	4.35475	4.79341	4.82599	5.04904	5.04249	4.60461	9.78482e-05	0.00119114
ENSG00000149131	SERPING1	ENST00000676741;ENST00000278407;ENST00000531133;ENST00000678592;ENST00000378323;ENST00000678533;ENST00000676670;ENST00000677275;ENST00000457869;ENST00000403558;ENST00000530113	serpin family G member 1 [Source:HGNC Symbol;Acc:HGNC:1228]	retained_intron;protein_coding;nonsense_mediated_decay	0.998386	0.925002	0.831648	1.11347	1.21835	1.33762	1.55121	1.41474	1.59773	9.99979e-05	0.0012115
ENSG00000118513	MYB	ENST00000528774;ENST00000527615;ENST00000526889;ENST00000525477;ENST00000525514;ENST00000341911;ENST00000367814;ENST00000339290;ENST00000442647;ENST00000316528;ENST00000529586;ENST00000525940;ENST00000420123;ENST00000533624;ENST00000531845;ENST00000528345;ENST00000528343;ENST00000533384;ENST00000463282;ENST00000528015;ENST00000533837;ENST00000534044;ENST00000525002;ENST00000438901;ENST00000616088…	MYB proto-oncogene, transcription factor [Source:HGNC Symbol;Acc:HGNC:7545]	protein_coding;nonsense_mediated_decay;processed_transcript	14.8506	14.0666	14.183	13.6225	12.8517	13.799	11.6766	11.7403	11.4968	0.000100097	0.00121174
ENSG00000090238	YPEL3	ENST00000398841;ENST00000398838;ENST00000568681;ENST00000565479;ENST00000568674;ENST00000562641;ENST00000566401;ENST00000565110;ENST00000570099	yippee like 3 [Source:HGNC Symbol;Acc:HGNC:18327]	protein_coding;retained_intron;processed_transcript;nonsense_mediated_decay	7.06227	8.23653	7.22182	8.81373	8.20414	8.68657	10.4093	9.16314	9.65917	0.00010225	0.00122998
ENSG00000089486	CDIP1	ENST00000563332;ENST00000399599;ENST00000567695;ENST00000563186;ENST00000563507;ENST00000586768;ENST00000564828;ENST00000586728;ENST00000566234;ENST00000589890	cell death inducing p53 target 1 [Source:HGNC Symbol;Acc:HGNC:13234]	protein_coding;processed_transcript	1.12617	1.08774	1.04016	1.60487	1.28411	1.26045	1.79038	2.04259	1.88656	0.000107221	0.0012827
ENSG00000117399	CDC20	ENST00000372462;ENST00000310955;ENST00000478882;ENST00000482046	cell division cycle 20 [Source:HGNC Symbol;Acc:HGNC:1723]	protein_coding;processed_transcript	43.4887	41.5013	42.9443	42.8772	37.1609	37.6448	33.9257	33.5158	33.9114	0.000111247	0.00132566
ENSG00000143252	SDHC	ENST00000342751;ENST00000432287;ENST00000367975;ENST00000515731;ENST00000470743;ENST00000513009;ENST00000504963;ENST00000392169	succinate dehydrogenase complex subunit C [Source:HGNC Symbol;Acc:HGNC:10682]	protein_coding;processed_transcript;nonsense_mediated_decay	54.2171	56.7286	54.8407	51.1226	50.9545	49.4785	44.3684	46.7666	43.3233	0.000114342	0.00135829
ENSG00000170779	CDCA4	ENST00000336219	cell division cycle associated 4 [Source:HGNC Symbol;Acc:HGNC:14625]	protein_coding	24.2693	24.3028	22.8615	22.7181	22.6182	22.2988	19.1034	19.6452	18.673	0.000114533	0.0013594
ENSG00000164742	ADCY1	ENST00000297323;ENST00000621543;ENST00000646653;ENST00000432715;ENST00000468353	adenylate cyclase 1 [Source:HGNC Symbol;Acc:HGNC:232]	protein_coding;processed_transcript;retained_intron	7.59417	8.07148	7.67017	6.47267	6.49412	6.54027	6.68313	6.45846	6.81252	0.000119561	0.00140821
ENSG00000241316	SUCLG2-DT	ENST00000659899;ENST00000656446;ENST00000496640;ENST00000659329;ENST00000662687;ENST00000658269;ENST00000671174;ENST00000464420;ENST00000482677	SUCLG2 divergent transcript [Source:HGNC Symbol;Acc:HGNC:49643]	lncRNA	0.080672	0.0957335	0.096109	0.117973	0.139293	0.15684	0.182467	0.245827	0.222762	0.00012283	0.00144115
ENSG00000176046	NUPR1	ENST00000324873;ENST00000395641;ENST00000567646	nuclear protein 1, transcriptional regulator [Source:HGNC Symbol;Acc:HGNC:29990]	protein_coding;nonsense_mediated_decay	4.3821	4.36257	4.56239	3.25243	3.19971	3.05325	4.14491	3.51089	4.13252	0.000123468	0.00144419
ENSG00000104549	SQLE	ENST00000265896;ENST00000518604;ENST00000520493;ENST00000521232;ENST00000523430;ENST00000518931	squalene epoxidase [Source:HGNC Symbol;Acc:HGNC:11279]	protein_coding;retained_intron	45.3413	41.4058	39.3314	38.2308	38.8966	38.3382	34.0572	34.7766	33.7672	0.000136838	0.00158116
ENSG00000130939	UBE4B	ENST00000253251;ENST00000672724;ENST00000488228;ENST00000343090;ENST00000462658;ENST00000377153;ENST00000465408;ENST00000470736;ENST00000487244;ENST00000466379	ubiquitination factor E4B [Source:HGNC Symbol;Acc:HGNC:12500]	protein_coding;nonsense_mediated_decay;retained_intron;processed_transcript	10.7788	10.3787	9.58019	9.08881	9.07646	9.60981	8.44087	8.26672	8.09575	0.000137036	0.00158224
ENSG00000121741	ZMYM2	ENST00000382874;ENST00000610343;ENST00000382883;ENST00000382870;ENST00000382881;ENST00000382871;ENST00000620447;ENST00000490152;ENST00000468677;ENST00000494061;ENST00000490422	zinc finger MYM-type containing 2 [Source:HGNC Symbol;Acc:HGNC:12989]	protein_coding;retained_intron;processed_transcript	22.1498	21.4757	21.0054	22.5541	23.5544	23.24	24.5973	25.8886	24.6149	0.000140996	0.00162428
ENSG00000185088	RPS27L	ENST00000455271;ENST00000482846;ENST00000330964;ENST00000439025;ENST00000462430;ENST00000411926;ENST00000635699	ribosomal protein S27 like [Source:HGNC Symbol;Acc:HGNC:18476]	protein_coding;retained_intron	1.30508	1.4442	1.32573	1.56776	1.7324	1.58631	2.09804	1.88954	1.89275	0.000142209	0.00163454
ENSG00000137710	RDX	ENST00000544551;ENST00000647231;ENST00000645495;ENST00000645527;ENST00000646663;ENST00000530131;ENST00000532461;ENST00000529774;ENST00000642511;ENST00000530301;ENST00000528498;ENST00000530749;ENST00000533961;ENST00000528556;ENST00000533991;ENST00000645312;ENST00000527537;ENST00000530085	radixin [Source:HGNC Symbol;Acc:HGNC:9944]	protein_coding;nonsense_mediated_decay;retained_intron;processed_transcript	12.457	12.6543	12.1415	13.1564	13.8078	13.5058	14.3751	15.697	14.0182	0.000142852	0.00163947
ENSG00000248487	ABHD14A	ENST00000273596;ENST00000494478;ENST00000497864;ENST00000474575;ENST00000491470	abhydrolase domain containing 14A [Source:HGNC Symbol;Acc:HGNC:24538]	protein_coding;retained_intron	0.870404	1.08208	0.933075	1.17584	1.28547	1.4609	1.87762	1.78577	1.8964	0.000145428	0.00166401
ENSG00000127564	PKMYT1	ENST00000440027;ENST00000576268;ENST00000382240;ENST00000262300;ENST00000574385;ENST00000431515;ENST00000573944;ENST00000575632;ENST00000571102;ENST00000575981;ENST00000574730;ENST00000572059;ENST00000575040;ENST00000572658;ENST00000574680;ENST00000572832;ENST00000570649;ENST00000574333;ENST00000574415	protein kinase, membrane associated tyrosine/threonine 1 [Source:HGNC Symbol;Acc:HGNC:29650]	protein_coding;nonsense_mediated_decay;processed_transcript;retained_intron	13.9331	14.4106	13.9545	13.2807	12.1557	12.381	11.7411	10.4931	11.2886	0.000148292	0.00169054
ENSG00000167702	KIFC2	ENST00000301332;ENST00000643461;ENST00000531425;ENST00000645548;ENST00000533114;ENST00000642354;ENST00000529644;ENST00000531423;ENST00000529864	kinesin family member C2 [Source:HGNC Symbol;Acc:HGNC:29530]	protein_coding;retained_intron;processed_transcript	5.87218	6.36976	5.88363	7.9652	7.68256	7.6922	8.22989	6.46741	6.93343	0.000157204	0.00177609
ENSG00000185722	ANKFY1	ENST00000570535;ENST00000574367;ENST00000341657;ENST00000570934;ENST00000573250;ENST00000572564;ENST00000573722;ENST00000648043;ENST00000575298;ENST00000575955;ENST00000571547;ENST00000572412;ENST00000575509	ankyrin repeat and FYVE domain containing 1 [Source:HGNC Symbol;Acc:HGNC:20763]	protein_coding;retained_intron;processed_transcript;nonsense_mediated_decay	11.4716	11.2661	11.3189	10.9212	10.7603	10.883	9.65703	9.42537	9.41215	0.000157536	0.00177721
ENSG00000142507	PSMB6	ENST00000270586;ENST00000614486;ENST00000575079;ENST00000575643	proteasome 20S subunit beta 6 [Source:HGNC Symbol;Acc:HGNC:9543]	protein_coding;retained_intron	61.5709	74.9392	70.5897	63.0956	61.8363	58.7703	56.3067	53.2391	51.4432	0.00016014	0.00180258
ENSG00000143878	RHOB	ENST00000272233	ras homolog family member B [Source:HGNC Symbol;Acc:HGNC:668]	protein_coding	86.618	90.9149	92.226	84.7738	84.9089	84.2839	75.4449	75.2476	71.7123	0.00016029	0.00180294
ENSG00000101447	FAM83D	ENST00000619304;ENST00000619850	family with sequence similarity 83 member D [Source:HGNC Symbol;Acc:HGNC:16122]	protein_coding	17.1913	16.5876	15.8754	16.0972	13.9624	16.0959	12.5398	13.6715	12.6757	0.000163198	0.00183294
ENSG00000126583	PRKCG	ENST00000263431;ENST00000474397;ENST00000682902;ENST00000479081;ENST00000682028	protein kinase C gamma [Source:HGNC Symbol;Acc:HGNC:9402]	protein_coding;retained_intron	0.288361	0.310711	0.493336	0.494636	0.452677	0.505207	0.804403	0.772901	0.814838	0.000165191	0.00185259
ENSG00000117614	SYF2	ENST00000236273;ENST00000354361;ENST00000476231;ENST00000474160	SYF2 pre-mRNA splicing factor [Source:HGNC Symbol;Acc:HGNC:19824]	protein_coding;processed_transcript	5.09813	5.66138	5.27925	5.89469	6.09652	6.05369	7.1144	7.53066	6.40039	0.000165412	0.00185371
ENSG00000174837	ADGRE1	ENST00000250572;ENST00000312053;ENST00000381404	adhesion G protein-coupled receptor E1 [Source:HGNC Symbol;Acc:HGNC:3336]	protein_coding	0.252974	0.186333	0.162942	0.353639	0.25908	0.325959	0.611199	0.633317	0.424705	0.000165815	0.00185549
ENSG00000037897	METTL1	ENST00000324871;ENST00000257848;ENST00000553125;ENST00000549773;ENST00000551117;ENST00000548504;ENST00000548681;ENST00000547653	methyltransferase 1, tRNA methylguanosine [Source:HGNC Symbol;Acc:HGNC:7030]	protein_coding;nonsense_mediated_decay;retained_intron;processed_transcript	13.873	12.8801	12.581	11.6649	11.4399	11.4641	10.3351	9.53698	8.06864	0.000166891	0.00186275
ENSG00000105202	FBL	ENST00000594309;ENST00000595545;ENST00000221801;ENST00000593503;ENST00000599159;ENST00000594443	fibrillarin [Source:HGNC Symbol;Acc:HGNC:3599]	protein_coding;processed_transcript;retained_intron;nonsense_mediated_decay	84.9659	102.631	91.5359	85.3481	79.8371	82.4103	74.8658	73.1395	73.5684	0.000167343	0.00186575
ENSG00000130726	TRIM28	ENST00000341753;ENST00000597136;ENST00000601150;ENST00000253024;ENST00000598355;ENST00000595974;ENST00000593582;ENST00000600840;ENST00000597995;ENST00000595028;ENST00000597968;ENST00000597618;ENST00000597423;ENST00000597172	tripartite motif containing 28 [Source:HGNC Symbol;Acc:HGNC:16384]	protein_coding;retained_intron	159.667	147.47	151.06	148.696	144.833	146.036	134.436	135.16	131.944	0.000167731	0.0018687
ENSG00000177971	IMP3	ENST00000314852;ENST00000403490;ENST00000565349	IMP U3 small nucleolar ribonucleoprotein 3 [Source:HGNC Symbol;Acc:HGNC:14497]	protein_coding;processed_transcript	18.3038	19.099	18.0306	15.4412	14.8552	13.3866	16.2382	15.7958	14.7395	0.000168767	0.0018775
ENSG00000114439	BBX	ENST00000325805;ENST00000415149;ENST00000443253;ENST00000406780;ENST00000458347;ENST00000402543;ENST00000456419;ENST00000497629;ENST00000416476;ENST00000454540;ENST00000456817;ENST00000402163;ENST00000474137;ENST00000449271;ENST00000449335;ENST00000427402	BBX high mobility group box domain containing [Source:HGNC Symbol;Acc:HGNC:14422]	protein_coding;retained_intron	7.99121	7.3673	7.43415	8.14201	8.35685	8.19258	9.03028	8.9369	8.73181	0.000172074	0.00190456
ENSG00000233622	CYP2T1P	ENST00000641596;ENST00000432607	cytochrome P450 family 2 subfamily T member 1, pseudogene [Source:HGNC Symbol;Acc:HGNC:18852]	processed_transcript;transcribed_unitary_pseudogene	1.02001	0.760932	0.872572	1.23987	1.11112	1.18052	1.65085	1.57493	1.76185	0.000172606	0.00190768
ENSG00000153113	CAST	ENST00000674984;ENST00000508608;ENST00000509903;ENST00000675858;ENST00000395812;ENST00000675663;ENST00000395813;ENST00000508830;ENST00000510500;ENST00000309190;ENST00000504465;ENST00000510156;ENST00000508117;ENST00000513666;ENST00000510245;ENST00000514055;ENST00000421689;ENST00000675275;ENST00000512191;ENST00000675479;ENST00000675185;ENST00000512620;ENST00000509529;ENST00000675614;ENST00000505402…	calpastatin [Source:HGNC Symbol;Acc:HGNC:1515]	protein_coding;nonsense_mediated_decay;retained_intron;processed_transcript	8.02268	7.93138	7.47009	8.3922	8.9337	8.77267	9.09991	9.5494	8.80858	0.000173084	0.00191157
ENSG00000228589	SPCS2P4	ENST00000436160	signal peptidase complex subunit 2 pseudogene 4 [Source:HGNC Symbol;Acc:HGNC:45237]	processed_pseudogene	9.55388	9.8678	13.5079	13.7953	19.7861	15.0319	19.0436	17.2797	21.9044	0.000174065	0.00192101
ENSG00000140465	CYP1A1	ENST00000395048;ENST00000617691;ENST00000564596;ENST00000379727;ENST00000569630;ENST00000395049;ENST00000567032	cytochrome P450 family 1 subfamily A member 1 [Source:HGNC Symbol;Acc:HGNC:2595]	protein_coding;nonsense_mediated_decay	2.22431	1.89074	1.99454	3.56262	3.11333	3.3529	2.65758	3.0345	2.64423	0.000176681	0.00194426
ENSG00000286075	SAGSIN1	ENST00000578372	salivary gland specific protein SAGSIN1 [Source:NCBI gene (formerly Entrezgene);Acc:122526779]	protein_coding	12.7871	14.6768	13.6693	8.02753	8.48271	4.06103	8.00577	13.5004	7.93237	0.000179943	0.00197306
ENSG00000101132	PFDN4	ENST00000487129;ENST00000371419;ENST00000493356;ENST00000441080;ENST00000474326	prefoldin subunit 4 [Source:HGNC Symbol;Acc:HGNC:8868]	processed_transcript;protein_coding;nonsense_mediated_decay	60.8136	60.6717	62.3177	70.9661	76.776	69.4927	64.1626	65.8569	65.4499	0.000181752	0.00199
ENSG00000245080	MIR3150BHG	ENST00000501164	MIR3150B host gene [Source:HGNC Symbol;Acc:HGNC:52000]	lncRNA	0.556296	0.684901	0.67004	0.812726	0.937952	0.768928	1.43642	1.45443	1.014	0.000188877	0.00205473
ENSG00000152137	HSPB8	ENST00000281938;ENST00000676071;ENST00000542496	heat shock protein family B (small) member 8 [Source:HGNC Symbol;Acc:HGNC:30171]	protein_coding;processed_transcript	3.48646	2.8447	2.92704	4.41161	4.24264	3.99504	4.27906	4.47207	4.54272	0.000190051	0.00206456
ENSG00000117139	KDM5B	ENST00000648338;ENST00000650417;ENST00000367265;ENST00000648469;ENST00000650569;ENST00000649230;ENST00000649770;ENST00000367264;ENST00000649089;ENST00000650506;ENST00000650422;ENST00000648958;ENST00000648056;ENST00000235790;ENST00000650368;ENST00000647747;ENST00000649339;ENST00000649542;ENST00000498276;ENST00000647657;ENST00000472822;ENST00000649321;ENST00000648354;ENST00000648744;ENST00000491153…	lysine demethylase 5B [Source:HGNC Symbol;Acc:HGNC:18039]	protein_coding;nonsense_mediated_decay;retained_intron;processed_transcript	16.484	15.1619	15.633	16.7751	16.1982	16.5661	18.0464	18.3304	17.4577	0.000192132	0.00208419
ENSG00000196220	SRGAP3	ENST00000383836;ENST00000470951;ENST00000360413;ENST00000491467;ENST00000490348;ENST00000433332;ENST00000490889;ENST00000485983;ENST00000520860;ENST00000518265	SLIT-ROBO Rho GTPase activating protein 3 [Source:HGNC Symbol;Acc:HGNC:19744]	protein_coding;retained_intron;processed_transcript	0.262407	0.285702	0.26567	0.358894	0.295763	0.332419	0.48044	0.481946	0.405182	0.000197658	0.00213501
ENSG00000090889	KIF4A	ENST00000374403;ENST00000485406	kinesin family member 4A [Source:HGNC Symbol;Acc:HGNC:13339]	protein_coding;processed_transcript	5.88641	5.45704	5.37938	4.93627	4.35212	5.10844	3.81233	4.26137	3.95622	0.000200306	0.00216056
ENSG00000248098	BCKDHA	ENST00000269980;ENST00000541315;ENST00000545787;ENST00000544905;ENST00000535632;ENST00000457836;ENST00000538423	branched chain keto acid dehydrogenase E1 subunit alpha [Source:HGNC Symbol;Acc:HGNC:986]	protein_coding;retained_intron;processed_transcript	43.3015	42.5324	45.3377	40.4592	40.6032	39.7648	36.5404	35.3669	35.3562	0.000207421	0.00222627
ENSG00000120837	NFYB	ENST00000551727;ENST00000551446;ENST00000240055;ENST00000550881;ENST00000550189	nuclear transcription factor Y subunit beta [Source:HGNC Symbol;Acc:HGNC:7805]	protein_coding;retained_intron	6.65831	6.82267	6.98018	6.75653	8.1241	7.22135	8.30317	8.62065	8.54208	0.00020735	0.00222627
ENSG00000153982	GDPD1	ENST00000284116;ENST00000583543;ENST00000579020;ENST00000581276;ENST00000578026	glycerophosphodiester phosphodiesterase domain containing 1 [Source:HGNC Symbol;Acc:HGNC:20883]	protein_coding;retained_intron;nonsense_mediated_decay	1.92772	1.7605	1.41661	2.08312	2.16021	2.23237	2.64403	2.72513	3.03418	0.000207669	0.00222736
ENSG00000224616	RTCA-AS1	ENST00000670421;ENST00000665523;ENST00000650038;ENST00000653267	RTCA antisense RNA 1 [Source:HGNC Symbol;Acc:HGNC:50573]	lncRNA	0.0976922	0.0628482	0.0729049	0.133675	0.106672	0.126315	0.180766	0.231905	0.19403	0.000226047	0.00240051
ENSG00000231721	LINC-PINT	ENST00000702156;ENST00000643779;ENST00000702406;ENST00000702866;ENST00000642483;ENST00000702917;ENST00000702568;ENST00000701979;ENST00000703012;ENST00000644432;ENST00000647388;ENST00000642156;ENST00000647288;ENST00000701954;ENST00000703250;ENST00000702681;ENST00000702906;ENST00000451786;ENST00000702162;ENST00000418546;ENST00000443623;ENST00000702983;ENST00000659385;ENST00000701119;ENST00000429901…	long intergenic non-protein coding RNA, p53 induced transcript [Source:HGNC Symbol;Acc:HGNC:26885]	lncRNA;retained_intron	0.10775	0.0917789	0.0785757	0.125204	0.150563	0.126963	0.170458	0.16582	0.196943	0.000229959	0.00243107
ENSG00000126804	ZBTB1	ENST00000554015;ENST00000683701;ENST00000358738;ENST00000556818;ENST00000555321	zinc finger and BTB domain containing 1 [Source:HGNC Symbol;Acc:HGNC:20259]	protein_coding;processed_transcript	8.58657	8.84558	7.81978	9.2544	9.41059	8.72435	9.9883	10.3503	10.3332	0.000234724	0.00247573
ENSG00000167772	ANGPTL4	ENST00000301455;ENST00000393962;ENST00000601886;ENST00000601770;ENST00000594348;ENST00000599192;ENST00000598255	angiopoietin like 4 [Source:HGNC Symbol;Acc:HGNC:16039]	protein_coding;retained_intron	14.3309	14.6264	14.2059	17.8992	15.8833	15.8831	19.5348	17.8175	16.2619	0.000242535	0.00254579
ENSG00000102393	GLA	ENST00000480513;ENST00000493905;ENST00000675968;ENST00000468823;ENST00000466414;ENST00000674634;ENST00000676156;ENST00000218516;ENST00000676372;ENST00000675799;ENST00000479445;ENST00000649178;ENST00000674142;ENST00000674127;ENST00000486121;ENST00000675592	galactosidase alpha [Source:HGNC Symbol;Acc:HGNC:4296]	nonsense_mediated_decay;retained_intron;protein_coding	8.40814	7.90466	8.01058	7.16894	7.59393	7.60033	6.2935	6.75764	6.59551	0.00024411	0.00255879
ENSG00000006744	ELAC2	ENST00000426905;ENST00000480891;ENST00000484122;ENST00000338034;ENST00000580504;ENST00000609757;ENST00000583371;ENST00000476042;ENST00000609101;ENST00000446899;ENST00000578991;ENST00000487229;ENST00000465825;ENST00000581499;ENST00000492559;ENST00000578104;ENST00000491478	elaC ribonuclease Z 2 [Source:HGNC Symbol;Acc:HGNC:14198]	protein_coding;retained_intron;nonsense_mediated_decay	18.9845	19.8655	19.2689	18.3387	18.2905	18.6157	16.6355	16.2869	16.8208	0.000249783	0.00260572
ENSG00000102967	DHODH	ENST00000219240;ENST00000574309;ENST00000572887;ENST00000573843;ENST00000576145;ENST00000571392;ENST00000572003;ENST00000571288;ENST00000573922	dihydroorotate dehydrogenase (quinone) [Source:HGNC Symbol;Acc:HGNC:2867]	protein_coding;retained_intron;nonsense_mediated_decay;processed_transcript	1.82937	1.87248	1.91227	1.78109	1.79051	1.5563	1.24819	1.18648	1.18851	0.000250563	0.00260849
ENSG00000141522	ARHGDIA	ENST00000400721;ENST00000580685;ENST00000580033;ENST00000584461;ENST00000269321;ENST00000582984;ENST00000541078;ENST00000582309;ENST00000583111;ENST00000578351;ENST00000584397;ENST00000583791;ENST00000583868;ENST00000579121;ENST00000583499	Rho GDP dissociation inhibitor alpha [Source:HGNC Symbol;Acc:HGNC:678]	protein_coding;nonsense_mediated_decay;retained_intron	113.878	104.89	109.779	105.774	105.277	103.372	93.2443	90.2895	92.9147	0.000252648	0.00262305
ENSG00000014257	ACP3	ENST00000351273;ENST00000336375;ENST00000512463;ENST00000475741;ENST00000483689;ENST00000495911	acid phosphatase 3 [Source:HGNC Symbol;Acc:HGNC:125]	protein_coding;retained_intron	0.715143	0.832171	0.708101	0.694563	1.30485	1.01878	1.4909	1.59212	1.39127	0.000256931	0.00266025
ENSG00000170836	PPM1D	ENST00000693196;ENST00000392995;ENST00000693102;ENST00000688505;ENST00000686064;ENST00000692386;ENST00000305921;ENST00000629650;ENST00000689445;ENST00000590418;ENST00000687355;ENST00000685582	protein phosphatase, Mg2+/Mn2+ dependent 1D [Source:HGNC Symbol;Acc:HGNC:9277]	nonsense_mediated_decay;protein_coding;retained_intron;processed_transcript	31.2918	29.8329	29.9343	31.0136	32.4127	32.0797	34.998	36.7606	33.7697	0.000258163	0.00266757
ENSG00000088833	NSFL1C	ENST00000353088;ENST00000461211;ENST00000381653;ENST00000216879;ENST00000555944;ENST00000476071;ENST00000470376;ENST00000555568;ENST00000478168;ENST00000555359;ENST00000487086	NSFL1 cofactor [Source:HGNC Symbol;Acc:HGNC:15912]	protein_coding;processed_transcript;nonsense_mediated_decay;retained_intron	8.49565	8.4926	8.64277	8.28848	7.6528	8.22894	6.55375	7.13144	7.04925	0.000262582	0.0026986
ENSG00000273328	ENSG00000273328	ENST00000471537;ENST00000487368;ENST00000496604	novel transcript	lncRNA	0.319073	0.351245	0.292305	0.358578	0.457197	0.498443	0.721675	0.732906	0.607916	0.000270519	0.00277082
ENSG00000168137	SETD5	ENST00000665872;ENST00000682236;ENST00000493918;ENST00000684055;ENST00000693430;ENST00000682536;ENST00000670063;ENST00000689167;ENST00000443339;ENST00000691175;ENST00000691925;ENST00000413704;ENST00000402198;ENST00000663774;ENST00000691299;ENST00000666307;ENST00000478961;ENST00000687014;ENST00000421188;ENST00000431285;ENST00000488236;ENST00000407969;ENST00000688835;ENST00000466826;ENST00000691659…	SET domain containing 5 [Source:HGNC Symbol;Acc:HGNC:25566]	nonsense_mediated_decay;retained_intron;protein_coding;processed_transcript	10.8971	10.5991	10.5901	11.3489	11.0094	11.2795	12.5016	12.0521	12.3224	0.000274029	0.00279925
ENSG00000149573	MPZL2	ENST00000529376;ENST00000278937;ENST00000438295;ENST00000534175;ENST00000527282;ENST00000528554;ENST00000525647	myelin protein zero like 2 [Source:HGNC Symbol;Acc:HGNC:3496]	retained_intron;protein_coding;processed_transcript	10.6619	10.6197	9.81998	11.0334	12.064	10.803	12.8275	13.2885	12.0293	0.000275043	0.00280584
ENSG00000256683	ZNF350	ENST00000243644;ENST00000593596;ENST00000601430;ENST00000594929;ENST00000597788;ENST00000598254;ENST00000600703;ENST00000599258;ENST00000597555	zinc finger protein 350 [Source:HGNC Symbol;Acc:HGNC:16656]	protein_coding;retained_intron;processed_transcript	3.30526	2.78508	3.04028	3.50679	3.51194	3.38645	4.49017	4.10983	4.05091	0.00027698	0.00281994
ENSG00000092929	UNC13D	ENST00000207549;ENST00000590856;ENST00000592386;ENST00000699511;ENST00000591563;ENST00000587504;ENST00000586930;ENST00000587495;ENST00000591616;ENST00000699513;ENST00000588774;ENST00000699512	unc-13 homolog D [Source:HGNC Symbol;Acc:HGNC:23147]	protein_coding;retained_intron;nonsense_mediated_decay;processed_transcript	1.64803	1.51373	1.27326	1.73432	1.66651	1.70419	2.28118	2.15407	2.00347	0.000287495	0.00290951
ENSG00000137745	MMP13	ENST00000260302	matrix metallopeptidase 13 [Source:HGNC Symbol;Acc:HGNC:7159]	protein_coding	0.0845815	0.0904772	0.215041	0.367457	0.163856	0.325105	0.499379	0.413348	0.682604	0.000293082	0.00295819
ENSG00000154930	ACSS1	ENST00000484396;ENST00000323482;ENST00000432802;ENST00000537502;ENST00000376726	acyl-CoA synthetase short chain family member 1 [Source:HGNC Symbol;Acc:HGNC:16091]	processed_transcript;protein_coding	3.74324	3.93971	4.11161	4.33842	4.31151	4.03254	4.80806	4.74381	4.78431	0.000298783	0.00300975
ENSG00000143434	SEMA6C	ENST00000341697;ENST00000489944;ENST00000485745;ENST00000368912;ENST00000464018;ENST00000368914;ENST00000368913	semaphorin 6C [Source:HGNC Symbol;Acc:HGNC:10740]	protein_coding;processed_transcript	0.327758	0.317522	0.243183	0.417546	0.432841	0.331661	0.5659	0.660628	0.550833	0.000300602	0.00302414
ENSG00000134352	IL6ST	ENST00000698646;ENST00000506241;ENST00000698638;ENST00000651614;ENST00000577363;ENST00000381294;ENST00000698641;ENST00000698639;ENST00000698644;ENST00000698648;ENST00000698643;ENST00000698642;ENST00000381298;ENST00000523039;ENST00000583149;ENST00000698649;ENST00000698645;ENST00000423954;ENST00000698640;ENST00000503773;ENST00000522633	interleukin 6 cytokine family signal transducer [Source:HGNC Symbol;Acc:HGNC:6021]	protein_coding;retained_intron;nonsense_mediated_decay;processed_transcript	9.53139	8.9201	8.321	7.05435	7.6912	7.10564	8.09531	8.68174	8.00875	0.000306725	0.00307755
ENSG00000184117	NIPSNAP1	ENST00000216121;ENST00000494966;ENST00000415100;ENST00000455496;ENST00000496944;ENST00000437094	nipsnap homolog 1 [Source:HGNC Symbol;Acc:HGNC:7827]	protein_coding;processed_transcript;nonsense_mediated_decay;retained_intron	66.0291	65.2489	68.9953	63.6509	64.2319	63.8876	54.7657	57.2644	55.1183	0.000306676	0.00307755
ENSG00000156171	DRAM2	ENST00000286692;ENST00000484310;ENST00000490780;ENST00000461449;ENST00000477769;ENST00000480600;ENST00000539140;ENST00000477588;ENST00000496430;ENST00000463682	DNA damage regulated autophagy modulator 2 [Source:HGNC Symbol;Acc:HGNC:28769]	protein_coding;processed_transcript;nonsense_mediated_decay	10.9379	10.0654	11.3115	12.2873	11.6824	11.9855	12.9272	13.7497	12.385	0.000307931	0.00308559
ENSG00000142945	KIF2C	ENST00000372224;ENST00000452259;ENST00000372217;ENST00000480574;ENST00000472235;ENST00000423289;ENST00000493027;ENST00000455186	kinesin family member 2C [Source:HGNC Symbol;Acc:HGNC:6393]	protein_coding;processed_transcript	14.337	15.7639	13.8342	13.4515	13.4463	12.4366	11.4435	11.5478	11.534	0.000327446	0.00325121
ENSG00000185813	PCYT2	ENST00000570388;ENST00000571105;ENST00000538721;ENST00000538936;ENST00000574343;ENST00000571581;ENST00000572995;ENST00000572473;ENST00000574155;ENST00000571944;ENST00000573927;ENST00000570391;ENST00000331285;ENST00000576343;ENST00000573636;ENST00000572157;ENST00000572924	phosphate cytidylyltransferase 2, ethanolamine [Source:HGNC Symbol;Acc:HGNC:8756]	protein_coding;retained_intron	5.48596	6.09315	6.28468	5.6469	5.38299	5.69035	4.74965	4.78395	4.65876	0.000331512	0.00328089
ENSG00000173727	ENSG00000173727	ENST00000619960;ENST00000685970;ENST00000702924;ENST00000637245;ENST00000637877;ENST00000309775	Finkel-Biskis-Reilly murine sarcoma virus (FBR-MuSV) ubiquitously expressed (FAU) pseudogene	processed_transcript;transcribed_unprocessed_pseudogene	0.935566	1.14494	1.14731	1.35282	1.4147	1.95333	2.20312	1.96172	2.14052	0.000334938	0.00330835
ENSG00000023445	BIRC3	ENST00000263464;ENST00000615299;ENST00000673846;ENST00000527309;ENST00000527336	baculoviral IAP repeat containing 3 [Source:HGNC Symbol;Acc:HGNC:591]	protein_coding;retained_intron	0.355301	0.314962	0.262896	0.316654	0.495499	0.431074	0.611383	0.581707	0.617781	0.000337971	0.00333615
ENSG00000142089	IFITM3	ENST00000679382;ENST00000680932;ENST00000531688;ENST00000680209;ENST00000399808;ENST00000681840;ENST00000602949;ENST00000602809;ENST00000681304;ENST00000681184;ENST00000680023;ENST00000679793	interferon induced transmembrane protein 3 [Source:HGNC Symbol;Acc:HGNC:5414]	non_stop_decay;retained_intron;nonsense_mediated_decay;protein_coding;processed_transcript	379.582	405.733	379.77	349.092	330.548	335.067	336.755	292.349	362.724	0.000344568	0.0033939
ENSG00000140006	WDR89	ENST00000267522;ENST00000620954;ENST00000554717;ENST00000394942	WD repeat domain 89 [Source:HGNC Symbol;Acc:HGNC:20489]	protein_coding	9.13415	8.73213	8.29102	9.86223	9.46053	10.221	11.0049	11.319	9.99608	0.000344712	0.0033939
ENSG00000261104	ENSG00000261104	ENST00000565044	novel transcript	lncRNA	0.041117	0.089651	0.124429	0.249811	0.114423	0.160768	0.405812	0.349302	0.318294	0.000348425	0.00342382
ENSG00000131944	FAAP24	ENST00000699961;ENST00000588258;ENST00000254262;ENST00000699959;ENST00000590179;ENST00000590281	FA core complex associated protein 24 [Source:HGNC Symbol;Acc:HGNC:28467]	retained_intron;protein_coding;nonsense_mediated_decay	1.35838	1.26373	1.16734	1.47809	1.65022	1.39289	2.19858	2.34877	2.00258	0.000361383	0.00352615
ENSG00000259153	MAP3K9-DT	ENST00000661317;ENST00000697769;ENST00000653562;ENST00000697766;ENST00000697773;ENST00000697767;ENST00000697758;ENST00000697755;ENST00000697756;ENST00000685546;ENST00000697763;ENST00000697760;ENST00000697772;ENST00000557691;ENST00000697765;ENST00000697762;ENST00000697757;ENST00000697768;ENST00000554032;ENST00000697774	MAP3K9 divergent transcript [Source:HGNC Symbol;Acc:HGNC:53189]	lncRNA;retained_intron	0.755035	0.711753	0.632596	0.922833	0.785363	0.769596	1.17777	1.18051	1.10333	0.000365731	0.00356401
ENSG00000172531	PPP1CA	ENST00000537694;ENST00000312989;ENST00000532446;ENST00000677343;ENST00000376745;ENST00000677322;ENST00000358239;ENST00000679175;ENST00000526510;ENST00000532279;ENST00000529724;ENST00000546202;ENST00000542876	protein phosphatase 1 catalytic subunit alpha [Source:HGNC Symbol;Acc:HGNC:9281]	processed_transcript;protein_coding;retained_intron	75.6957	75.7022	73.4013	70.1555	69.2403	71.4201	63.2954	62.9075	63.7569	0.000375841	0.00364568
ENSG00000093000	NUP50	ENST00000347635;ENST00000432340;ENST00000469163;ENST00000430547;ENST00000407019;ENST00000419387;ENST00000484186;ENST00000396096;ENST00000493456;ENST00000434760;ENST00000491860;ENST00000461194;ENST00000422489;ENST00000461437;ENST00000424634;ENST00000497960;ENST00000486184	nucleoporin 50 [Source:HGNC Symbol;Acc:HGNC:8065]	protein_coding;retained_intron;nonsense_mediated_decay;processed_transcript	9.43338	9.34915	8.54911	8.49928	8.78476	8.53952	7.19622	7.26171	7.7885	0.000376273	0.00364575
ENSG00000167552	TUBA1A	ENST00000552924;ENST00000550811;ENST00000546918;ENST00000301071;ENST00000295766;ENST00000548363;ENST00000550254;ENST00000679733;ENST00000547939	tubulin alpha 1a [Source:HGNC Symbol;Acc:HGNC:20766]	protein_coding;retained_intron	49.2072	46.9605	42.9626	42.5178	40.5985	42.3149	38.1736	38.2836	38.1707	0.000388249	0.00374276
ENSG00000156508	EEF1A1	ENST00000678703;ENST00000610520;ENST00000491404;ENST00000490569;ENST00000678508;ENST00000309268;ENST00000495333;ENST00000488500;ENST00000455918;ENST00000676710;ENST00000356303;ENST00000316292;ENST00000615060;ENST00000676547;ENST00000678515;ENST00000678041;ENST00000677236;ENST00000331523;ENST00000678143;ENST00000679031;ENST00000423099;ENST00000677062	eukaryotic translation elongation factor 1 alpha 1 [Source:HGNC Symbol;Acc:HGNC:3189]	protein_coding;retained_intron;processed_transcript	662.263	707.234	675.06	633.716	634.313	627.749	608.534	617.225	619.503	0.000393802	0.00378508
ENSG00000169862	CTNND2	ENST00000504499;ENST00000513588;ENST00000304623;ENST00000495388;ENST00000514132;ENST00000506324;ENST00000508761;ENST00000507430;ENST00000502551;ENST00000509868	catenin delta 2 [Source:HGNC Symbol;Acc:HGNC:2516]	nonsense_mediated_decay;protein_coding;processed_transcript;retained_intron	9.717	9.52027	9.18666	10.0441	10.0846	10.2703	10.8696	11.3912	11.183	0.000407673	0.00389307
ENSG00000156990	RPUSD3	ENST00000433972;ENST00000383820;ENST00000484134;ENST00000424438;ENST00000472381;ENST00000423108;ENST00000466141;ENST00000473522;ENST00000418713;ENST00000464783;ENST00000427174;ENST00000433535;ENST00000475470;ENST00000460909	RNA pseudouridine synthase D3 [Source:HGNC Symbol;Acc:HGNC:28437]	protein_coding;retained_intron;processed_transcript	5.70949	6.45066	6.13162	5.86718	5.34468	5.6639	4.5347	5.01092	4.77812	0.000424373	0.00402732
ENSG00000136144	RCBTB1	ENST00000378302;ENST00000258646;ENST00000490058	RCC1 and BTB domain containing protein 1 [Source:HGNC Symbol;Acc:HGNC:18243]	protein_coding;processed_transcript	1.81223	2.13931	2.10123	2.59458	2.60309	2.49584	3.00229	3.2394	2.94453	0.000445583	0.00418947
ENSG00000139645	ANKRD52	ENST00000267116;ENST00000680755;ENST00000548081;ENST00000548241;ENST00000680693;ENST00000681390;ENST00000680026	ankyrin repeat domain 52 [Source:HGNC Symbol;Acc:HGNC:26614]	protein_coding;processed_transcript;retained_intron	14.1403	14.8716	14.6051	14.2862	12.5568	13.3062	12.5017	11.4228	11.7869	0.000454958	0.00426219
ENSG00000126012	KDM5C	ENST00000375383;ENST00000375401;ENST00000375379;ENST00000404049;ENST00000691505;ENST00000688699;ENST00000452825;ENST00000693277;ENST00000497995;ENST00000349663;ENST00000687928;ENST00000467093;ENST00000495519;ENST00000685423;ENST00000477109;ENST00000481369;ENST00000687695;ENST00000497100;ENST00000685641;ENST00000465402;ENST00000685539;ENST00000429877	lysine demethylase 5C [Source:HGNC Symbol;Acc:HGNC:11114]	protein_coding;retained_intron;processed_transcript;nonsense_mediated_decay	11.7876	11.1531	11.1811	10.6343	10.3394	10.1618	9.82004	9.42707	9.92589	0.000461398	0.00430893
ENSG00000142178	SIK1	ENST00000270162;ENST00000478426;ENST00000644871;ENST00000644276;ENST00000644689	salt inducible kinase 1 [Source:HGNC Symbol;Acc:HGNC:11142]	protein_coding;retained_intron	2.15956	2.01798	2.2165	2.48361	2.23121	2.48987	3.06356	3.08809	2.89454	0.000477371	0.00443905
ENSG00000170525	PFKFB3	ENST00000317350;ENST00000360521;ENST00000379775;ENST00000379789;ENST00000640683;ENST00000536985;ENST00000379785;ENST00000461744;ENST00000450232;ENST00000639949;ENST00000467491;ENST00000441697;ENST00000475881;ENST00000414237;ENST00000487989	6-phosphofructo-2-kinase/fructose-2,6-biphosphatase 3 [Source:HGNC Symbol;Acc:HGNC:8874]	protein_coding;nonsense_mediated_decay;retained_intron	24.238	25.2618	24.6663	27.9923	25.2354	25.6341	30.1487	27.7522	29.2716	0.000511609	0.00471428
ENSG00000235314	LINC00957	ENST00000441052;ENST00000416824	long intergenic non-protein coding RNA 957 [Source:HGNC Symbol;Acc:HGNC:22332]	lncRNA	0.289869	0.420712	0.455478	0.555007	0.716592	0.62776	0.862691	0.85301	0.859255	0.000563249	0.00513425
ENSG00000198830	HMGN2	ENST00000460563;ENST00000467700;ENST00000464888;ENST00000361427;ENST00000466194;ENST00000493418;ENST00000463817;ENST00000479815;ENST00000468388	high mobility group nucleosomal binding domain 2 [Source:HGNC Symbol;Acc:HGNC:4986]	processed_transcript;protein_coding	107.724	115.73	110.176	105.319	106.272	107.043	90.4418	92.5427	98.295	0.000573833	0.00520273
ENSG00000288920	RPSAP58	ENST00000692590;ENST00000484897;ENST00000689525;ENST00000471224;ENST00000462186;ENST00000688405;ENST00000692739;ENST00000685013;ENST00000475499;ENST00000687994;ENST00000691397;ENST00000685490	ribosomal protein SA pseudogene 58 [Source:HGNC Symbol;Acc:HGNC:36809]	processed_transcript;protein_coding	11.287	11.904	10.4556	9.60866	9.83106	9.37804	9.50145	9.08807	9.73166	0.000575505	0.00521169
ENSG00000065989	PDE4A	ENST00000380702;ENST00000592685;ENST00000293683;ENST00000440014;ENST00000590407;ENST00000589073	phosphodiesterase 4A [Source:HGNC Symbol;Acc:HGNC:8780]	protein_coding;retained_intron;nonsense_mediated_decay	0.999583	0.70099	0.85488	1.08363	1.2922	1.24192	1.41444	1.33373	1.43526	0.000593526	0.00534629
ENSG00000132953	XPO4	ENST00000255305;ENST00000490513;ENST00000465018	exportin 4 [Source:HGNC Symbol;Acc:HGNC:17796]	protein_coding;processed_transcript;retained_intron	9.70729	9.98126	9.30258	9.29253	9.34432	9.0837	7.97722	8.24809	8.01155	0.000593389	0.00534629
ENSG00000086619	ERO1B	ENST00000688164;ENST00000354619;ENST00000693072;ENST00000687487;ENST00000691874;ENST00000687604;ENST00000691519;ENST00000264181;ENST00000685201;ENST00000686625	endoplasmic reticulum oxidoreductase 1 beta [Source:HGNC Symbol;Acc:HGNC:14355]	retained_intron;protein_coding	0.139764	0.121864	0.118277	0.212135	0.213311	0.196194	0.245377	0.25514	0.200782	0.00059859	0.00538555
ENSG00000110841	PPFIBP1	ENST00000537927;ENST00000228425;ENST00000542629;ENST00000545334;ENST00000542187;ENST00000535575;ENST00000534917;ENST00000318304;ENST00000540256;ENST00000540114;ENST00000540503;ENST00000545381;ENST00000619325;ENST00000537261;ENST00000535047;ENST00000539326	PPFIA binding protein 1 [Source:HGNC Symbol;Acc:HGNC:9249]	protein_coding;retained_intron;non_stop_decay	2.8355	2.96436	2.95472	2.41292	2.50842	2.57497	2.2343	2.4707	2.22111	0.000601101	0.00540495
ENSG00000198805	PNP	ENST00000361505;ENST00000554056;ENST00000697614;ENST00000697613;ENST00000556293;ENST00000557229;ENST00000697615;ENST00000556754;ENST00000553591;ENST00000554065	purine nucleoside phosphorylase [Source:HGNC Symbol;Acc:HGNC:7892]	protein_coding;retained_intron	19.0185	18.9843	19.0916	16.1677	16.2971	16.3459	16.1079	16.2813	17.1783	0.00060416	0.00542195
ENSG00000111452	ADGRD1	ENST00000446583;ENST00000261654;ENST00000537489;ENST00000541143;ENST00000543617;ENST00000535015;ENST00000335486	adhesion G protein-coupled receptor D1 [Source:HGNC Symbol;Acc:HGNC:19893]	nonsense_mediated_decay;protein_coding;retained_intron	0.146637	0.0348828	0.155018	0.209974	0.168817	0.149869	0.316492	0.307516	0.303714	0.000604415	0.00542195
ENSG00000179409	GEMIN4	ENST00000576778;ENST00000319004;ENST00000437269;ENST00000574958;ENST00000573482;ENST00000576383;ENST00000570364	gem nuclear organelle associated protein 4 [Source:HGNC Symbol;Acc:HGNC:15717]	protein_coding	10.61	11.179	11.2325	9.86404	9.90201	10.4107	8.95001	9.20616	8.64311	0.000604999	0.00542399
ENSG00000175356	SCUBE2	ENST00000649792;ENST00000520467;ENST00000450649;ENST00000309263;ENST00000528651;ENST00000534295;ENST00000532532;ENST00000531429;ENST00000519535;ENST00000519788;ENST00000530265;ENST00000524317;ENST00000518447;ENST00000519202	signal peptide, CUB domain and EGF like domain containing 2 [Source:HGNC Symbol;Acc:HGNC:30425]	protein_coding;processed_transcript;retained_intron	14.9944	14.2205	14.2788	12.4783	11.9695	13.2671	12.1772	12.1848	12.531	0.000608938	0.0054561
ENSG00000108639	SYNGR2	ENST00000585591;ENST00000588282;ENST00000590201;ENST00000225777;ENST00000592456;ENST00000589168;ENST00000591770;ENST00000589183	synaptogyrin 2 [Source:HGNC Symbol;Acc:HGNC:11499]	protein_coding;processed_transcript;retained_intron;nonsense_mediated_decay	56.5964	57.8829	57.8775	52.9148	49.5311	49.1985	49.1785	45.9677	48.7104	0.00061025	0.00546464
ENSG00000263020	ENSG00000263020	ENST00000375880;ENST00000617558;ENST00000409691	novel protein	protein_coding	2.99052	3.40017	3.07623	1.80464	1.97776	1.33785	2.42536	1.45187	2.18415	0.000614902	0.00549661
ENSG00000146670	CDCA5	ENST00000479032;ENST00000275517;ENST00000404147;ENST00000462902;ENST00000529290;ENST00000524733;ENST00000533015;ENST00000531401	cell division cycle associated 5 [Source:HGNC Symbol;Acc:HGNC:14626]	retained_intron;protein_coding;nonsense_mediated_decay	21.2519	22.3964	21.7461	20.8263	20.5647	19.6957	17.4324	17.9013	18.3598	0.000638297	0.00565927
ENSG00000085433	WDR47	ENST00000369962;ENST00000369965;ENST00000400794	WD repeat domain 47 [Source:HGNC Symbol;Acc:HGNC:29141]	protein_coding	6.40569	6.2814	6.51633	6.39978	6.96871	6.84212	7.73829	7.84376	7.59359	0.000654504	0.00577274
ENSG00000132967	HMGB1P5	ENST00000255320;ENST00000451497	high mobility group box 1 pseudogene 5 [Source:HGNC Symbol;Acc:HGNC:4997]	transcribed_processed_pseudogene;processed_transcript	105.691	119.875	104.239	93.7946	98.3926	100.095	87.2347	94.3402	88.6364	0.000690426	0.00603773
ENSG00000124664	SPDEF	ENST00000544425;ENST00000374037	SAM pointed domain containing ETS transcription factor [Source:HGNC Symbol;Acc:HGNC:17257]	protein_coding	86.7718	96.9437	96.8963	78.8953	77.6554	77.9091	81.9765	80.4516	80.4473	0.000696957	0.00608729
ENSG00000103257	SLC7A5	ENST00000261622;ENST00000563489;ENST00000565644	solute carrier family 7 member 5 [Source:HGNC Symbol;Acc:HGNC:11063]	protein_coding;retained_intron	201.384	185.37	197.781	217.039	202.219	211.316	212.909	201.375	207.666	0.000709831	0.00618555
ENSG00000076555	ACACB	ENST00000377854;ENST00000338432;ENST00000538526;ENST00000542524;ENST00000377848;ENST00000544651;ENST00000396233;ENST00000546328;ENST00000537279;ENST00000537347;ENST00000544726;ENST00000539864;ENST00000543080;ENST00000536440;ENST00000534852	acetyl-CoA carboxylase beta [Source:HGNC Symbol;Acc:HGNC:85]	protein_coding;nonsense_mediated_decay;retained_intron;processed_transcript	1.34845	1.33407	1.26153	1.23291	1.10119	1.19948	1.03855	0.901021	0.905278	0.000719361	0.00625786
ENSG00000075624	ACTB	ENST00000477812;ENST00000674681;ENST00000675515;ENST00000425660;ENST00000473257;ENST00000432588;ENST00000676397;ENST00000646664;ENST00000462494;ENST00000493945;ENST00000645576;ENST00000642480;ENST00000645025;ENST00000646584;ENST00000417101;ENST00000484841;ENST00000443528;ENST00000414620;ENST00000480301	actin beta [Source:HGNC Symbol;Acc:HGNC:132]	retained_intron;protein_coding;nonsense_mediated_decay;processed_transcript	1423.63	1249.71	1261.41	1225.33	1164.43	1229.91	1127.93	1118.13	1215.06	0.000720812	0.00626691
ENSG00000003400	CASP10	ENST00000286186;ENST00000346817;ENST00000485408;ENST00000272879;ENST00000492363;ENST00000460140;ENST00000696190;ENST00000696199;ENST00000471191;ENST00000696191;ENST00000484926	caspase 10 [Source:HGNC Symbol;Acc:HGNC:1500]	protein_coding;retained_intron;nonsense_mediated_decay	0.301231	0.348318	0.2677	0.402492	0.462904	0.330958	0.577746	0.52577	0.567824	0.00073188	0.00634865
ENSG00000100726	TELO2	ENST00000262319;ENST00000563676;ENST00000567423;ENST00000568240;ENST00000564507;ENST00000569744;ENST00000497339;ENST00000567427	telomere maintenance 2 [Source:HGNC Symbol;Acc:HGNC:29099]	protein_coding;retained_intron;processed_transcript;nonsense_mediated_decay	16.9194	15.9801	16.4467	15.2375	15.5853	15.891	14.4636	13.0636	12.9401	0.000764706	0.00656613
ENSG00000140153	WDR20	ENST00000424963;ENST00000342702;ENST00000335263;ENST00000556511;ENST00000555879;ENST00000454394;ENST00000556807;ENST00000322340;ENST00000557186;ENST00000561154;ENST00000558567;ENST00000557485;ENST00000559478;ENST00000556094	WD repeat domain 20 [Source:HGNC Symbol;Acc:HGNC:19667]	protein_coding;nonsense_mediated_decay;processed_transcript	5.96488	5.3957	5.28053	5.28507	4.84871	4.69881	4.37064	4.36545	4.54292	0.000771201	0.00661073
ENSG00000242498	ARPIN	ENST00000357484;ENST00000460685;ENST00000560096	actin related protein 2/3 complex inhibitor [Source:HGNC Symbol;Acc:HGNC:28782]	protein_coding	0.799509	0.89503	0.884927	1.02569	0.989723	1.15187	1.41116	1.42835	1.20716	0.000783076	0.00670498
ENSG00000126768	TIMM17B	ENST00000472645;ENST00000495490;ENST00000465150;ENST00000696123;ENST00000464663;ENST00000696124;ENST00000396779;ENST00000376582;ENST00000490755;ENST00000466995	translocase of inner mitochondrial membrane 17B [Source:HGNC Symbol;Acc:HGNC:17310]	processed_transcript;protein_coding;retained_intron;nonsense_mediated_decay	7.43613	7.46467	7.36043	6.16573	6.40421	6.10856	5.46805	5.29523	5.54798	0.000784934	0.00671711
ENSG00000171720	HDAC3	ENST00000469550;ENST00000305264;ENST00000492407;ENST00000492506;ENST00000523088;ENST00000469207;ENST00000490808;ENST00000486618;ENST00000519474;ENST00000467533;ENST00000471968;ENST00000495485;ENST00000491581;ENST00000459727;ENST00000476739;ENST00000475549	histone deacetylase 3 [Source:HGNC Symbol;Acc:HGNC:4854]	retained_intron;protein_coding;processed_transcript;nonsense_mediated_decay	13.1904	13.6775	12.6111	12.2982	12.2505	12.2871	10.9858	10.6881	10.6939	0.000817009	0.0069224
ENSG00000062582	MRPS24	ENST00000317534;ENST00000418740;ENST00000483330;ENST00000414932;ENST00000467084	mitochondrial ribosomal protein S24 [Source:HGNC Symbol;Acc:HGNC:14510]	protein_coding;retained_intron;processed_transcript	10.3095	10.8762	10.1947	9.93082	9.02504	9.44077	7.24109	8.40957	8.28758	0.000817099	0.0069224
ENSG00000150961	SEC24D	ENST00000280551;ENST00000419654;ENST00000509818;ENST00000505134;ENST00000502526;ENST00000502830;ENST00000514418;ENST00000506622;ENST00000505280;ENST00000503683;ENST00000511715	SEC24 homolog D, COPII coat complex component [Source:HGNC Symbol;Acc:HGNC:10706]	protein_coding;nonsense_mediated_decay;processed_transcript;retained_intron	15.0497	15.5519	14.5971	14.4269	13.893	14.235	12.5431	12.9944	12.5677	0.00081879	0.00693288
ENSG00000136003	ISCU	ENST00000431221;ENST00000311893;ENST00000392807;ENST00000545932;ENST00000535729;ENST00000544493;ENST00000547005;ENST00000539580;ENST00000552072;ENST00000539593;ENST00000535405;ENST00000538193	iron-sulfur cluster assembly enzyme [Source:HGNC Symbol;Acc:HGNC:29882]	protein_coding;retained_intron;nonsense_mediated_decay	8.41027	8.54073	8.41511	7.71261	7.59952	7.91323	6.88229	7.03118	6.81173	0.000838821	0.00706324
ENSG00000077454	LRCH4	ENST00000476881;ENST00000310300;ENST00000467201;ENST00000487697;ENST00000470184;ENST00000498539;ENST00000490359;ENST00000497245;ENST00000485583;ENST00000485554	leucine rich repeats and calponin homology domain containing 4 [Source:HGNC Symbol;Acc:HGNC:6691]	retained_intron;protein_coding;processed_transcript	7.39174	7.28322	6.86275	6.61752	5.5715	6.93204	5.62661	5.43567	5.94404	0.000838452	0.00706324
ENSG00000132950	ZMYM5	ENST00000382905;ENST00000467542;ENST00000382907;ENST00000535942;ENST00000382909;ENST00000337963;ENST00000495534	zinc finger MYM-type containing 5 [Source:HGNC Symbol;Acc:HGNC:13029]	protein_coding;retained_intron	7.52932	7.27003	7.90147	8.29617	8.88709	8.76317	9.20593	9.51067	8.77129	0.000868579	0.00728966
ENSG00000274173	LINC02967	ENST00000620459	long intergenic non-protein coding RNA 2967 [Source:HGNC Symbol;Acc:HGNC:56007]	lncRNA	13.5074	13.8788	14.0604	15.579	17.7621	18.4747	20.062	17.4085	17.5588	0.000871352	0.00730488
ENSG00000105568	PPP2R1A	ENST00000462990;ENST00000454220;ENST00000322088;ENST00000468280;ENST00000477989;ENST00000391791;ENST00000628959;ENST00000473820;ENST00000473455;ENST00000462047;ENST00000490868	protein phosphatase 2 scaffold subunit Aalpha [Source:HGNC Symbol;Acc:HGNC:9302]	protein_coding;retained_intron;processed_transcript;nonsense_mediated_decay	64.6127	62.8066	64.1914	60.199	59.9836	60.5285	56.4922	56.5458	53.0638	0.000872176	0.00730777
ENSG00000178252	WDR6	ENST00000471162;ENST00000452875;ENST00000610967;ENST00000395474;ENST00000608424;ENST00000489684;ENST00000462064;ENST00000627177;ENST00000448293;ENST00000491365;ENST00000415265;ENST00000489427;ENST00000492780;ENST00000498023;ENST00000420783	WD repeat domain 6 [Source:HGNC Symbol;Acc:HGNC:12758]	retained_intron;nonsense_mediated_decay;protein_coding;processed_transcript	27.9069	30.6706	30.2887	28.9506	25.9494	25.2399	25.5276	21.7384	24.107	0.000898105	0.00749618
ENSG00000155850	SLC26A2	ENST00000286298;ENST00000690410	solute carrier family 26 member 2 [Source:HGNC Symbol;Acc:HGNC:10994]	protein_coding;retained_intron	1.30076	1.31633	1.53297	1.42602	1.7956	1.5726	1.77477	2.04901	1.95181	0.000913065	0.00760439
ENSG00000233871	DLG5-AS1	ENST00000632919;ENST00000449852	DLG5 antisense RNA 1 [Source:HGNC Symbol;Acc:HGNC:45109]	retained_intron;lncRNA	0.197301	0.0923517	0.213961	0.378363	0.206999	0.247374	0.559538	0.59622	0.489411	0.000914629	0.0076091
ENSG00000128422	KRT17	ENST00000311208;ENST00000590038;ENST00000648859;ENST00000649249;ENST00000491673;ENST00000493253	keratin 17 [Source:HGNC Symbol;Acc:HGNC:6427]	protein_coding;retained_intron	1.51236	1.29384	1.71327	1.92443	2.0158	1.90947	2.3693	2.79299	2.39148	0.000939388	0.00780229
ENSG00000113719	ERGIC1	ENST00000687901;ENST00000686955;ENST00000690799;ENST00000693299;ENST00000686615;ENST00000393784;ENST00000523215;ENST00000685391;ENST00000687702;ENST00000691612;ENST00000693572;ENST00000519567;ENST00000520326;ENST00000688069;ENST00000523291;ENST00000326654;ENST00000523650;ENST00000520399;ENST00000523366;ENST00000684928;ENST00000518247;ENST00000519860;ENST00000690977;ENST00000521392;ENST00000520642…	endoplasmic reticulum-golgi intermediate compartment 1 [Source:HGNC Symbol;Acc:HGNC:29205]	protein_coding;nonsense_mediated_decay;retained_intron;processed_transcript	28.9477	28.9147	28.8979	25.3836	24.8877	25.3557	25.5793	24.9503	27.1212	0.000958922	0.00793858
ENSG00000106541	AGR2	ENST00000419304;ENST00000401412;ENST00000489523;ENST00000468419;ENST00000450569;ENST00000412973;ENST00000486219	anterior gradient 2, protein disulphide isomerase family member [Source:HGNC Symbol;Acc:HGNC:328]	protein_coding;retained_intron;processed_transcript	50.8613	50.2804	51.731	46.5857	46.2188	49.6766	41.4435	39.9679	46.6349	0.000980084	0.00809618
ENSG00000186193	SAPCD2	ENST00000409687	suppressor APC domain containing 2 [Source:HGNC Symbol;Acc:HGNC:28055]	protein_coding	29.6146	32.3521	31.3747	30.0465	28.3461	28.1814	26.9923	26.0748	25.0107	0.000981985	0.00810611
ENSG00000131791	PRKAB2	ENST00000254101;ENST00000496858;ENST00000474939	protein kinase AMP-activated non-catalytic subunit beta 2 [Source:HGNC Symbol;Acc:HGNC:9379]	protein_coding;processed_transcript	7.77246	7.26416	7.55825	8.10482	8.88307	8.92832	8.74723	9.08073	8.59295	0.000987761	0.00813755
ENSG00000110171	TRIM3	ENST00000359518;ENST00000532542;ENST00000345851;ENST00000526845;ENST00000530724;ENST00000533309;ENST00000528227;ENST00000527237;ENST00000533064;ENST00000536344	tripartite motif containing 3 [Source:HGNC Symbol;Acc:HGNC:10064]	protein_coding;retained_intron;processed_transcript	2.28201	2.50094	2.51034	2.08623	2.02629	1.85975	1.79243	1.47309	1.70202	0.000992214	0.00816982
ENSG00000237330	RNF223	ENST00000453464	ring finger protein 223 [Source:HGNC Symbol;Acc:HGNC:40020]	protein_coding	17.8887	17.8042	18.4978	20.5574	21.1854	20.0037	24.2982	22.3688	19.4904	0.000994801	0.00817786
ENSG00000107562	CXCL12	ENST00000374429;ENST00000343575;ENST00000374426;ENST00000496375;ENST00000488591;ENST00000395794	C-X-C motif chemokine ligand 12 [Source:HGNC Symbol;Acc:HGNC:10672]	protein_coding;processed_transcript;retained_intron	5.35404	4.53626	4.88332	4.65794	4.52966	4.54118	3.88483	3.8714	3.91846	0.00107663	0.00875609
ENSG00000038219	BOD1L1	ENST00000040738;ENST00000507943;ENST00000482713;ENST00000505343;ENST00000511119;ENST00000509897	biorientation of chromosomes in cell division 1 like 1 [Source:HGNC Symbol;Acc:HGNC:31792]	protein_coding;nonsense_mediated_decay;retained_intron	3.11117	2.68779	2.77798	3.11287	3.19395	3.30207	3.67532	3.37635	3.32299	0.00107849	0.00876657
ENSG00000107485	GATA3	ENST00000481743;ENST00000643001;ENST00000379328;ENST00000346208;ENST00000461472	GATA binding protein 3 [Source:HGNC Symbol;Acc:HGNC:4172]	protein_coding;processed_transcript	373.516	326.379	346.283	320.374	308.492	321.615	322.549	296.245	317.028	0.00107976	0.00877218
ENSG00000183258	DDX41	ENST00000330503;ENST00000652623;ENST00000507955;ENST00000507900;ENST00000652618;ENST00000505081;ENST00000503078;ENST00000512027;ENST00000504781;ENST00000515562;ENST00000629036;ENST00000512431;ENST00000506965;ENST00000513562;ENST00000652565;ENST00000650742;ENST00000504807;ENST00000510171;ENST00000509576;ENST00000512334;ENST00000508279	DEAD-box helicase 41 [Source:HGNC Symbol;Acc:HGNC:18674]	protein_coding;retained_intron;nonsense_mediated_decay;processed_transcript	26.7745	26.8712	27.3455	25.7262	25.1481	25.6512	23.4656	21.2111	23.5273	0.00108459	0.00880677
ENSG00000169230	PRELID1	ENST00000503853;ENST00000504594;ENST00000303204;ENST00000503216;ENST00000502670;ENST00000510797;ENST00000511309;ENST00000510701	PRELI domain containing 1 [Source:HGNC Symbol;Acc:HGNC:30255]	protein_coding;nonsense_mediated_decay;processed_transcript;retained_intron	95.5941	93.6032	90.2513	89.1937	87.3462	87.6699	81.623	79.1665	74.8859	0.00108599	0.00881344
ENSG00000166509	CLEC3A	ENST00000567430;ENST00000651443	C-type lectin domain family 3 member A [Source:HGNC Symbol;Acc:HGNC:2052]	nonsense_mediated_decay;protein_coding	2.699	2.64052	2.41109	2.61904	2.93376	3.28944	3.92997	4.11651	3.75682	0.00108813	0.00882136
ENSG00000196428	TSC22D2	ENST00000361875;ENST00000466814;ENST00000688009;ENST00000460316;ENST00000492828;ENST00000480589;ENST00000485421	TSC22 domain family member 2 [Source:HGNC Symbol;Acc:HGNC:29095]	protein_coding;retained_intron;processed_transcript;nonsense_mediated_decay	4.53691	4.3809	4.5156	5.05687	4.87463	4.69308	5.69285	5.33241	4.98934	0.00110861	0.00893988
ENSG00000107789	MINPP1	ENST00000536010;ENST00000371994;ENST00000371996;ENST00000472891	multiple inositol-polyphosphate phosphatase 1 [Source:HGNC Symbol;Acc:HGNC:7102]	protein_coding;processed_transcript	5.45298	5.48674	4.65986	5.56659	6.21855	5.99937	6.38192	7.39534	7.23035	0.00111839	0.00900443
ENSG00000151445	VIPAS39	ENST00000327028;ENST00000557658;ENST00000343765;ENST00000553888;ENST00000556909;ENST00000553691;ENST00000553576;ENST00000555854;ENST00000448935	VPS33B interacting protein, apical-basolateral polarity regulator, spe-39 homolog [Source:HGNC Symbol;Acc:HGNC:20347]	protein_coding;processed_transcript;retained_intron	14.0765	14.1872	12.8528	12.6506	12.9149	12.9297	11.2947	11.2871	11.4568	0.00112091	0.00901991
ENSG00000111911	HINT3	ENST00000229633	histidine triad nucleotide binding protein 3 [Source:HGNC Symbol;Acc:HGNC:18468]	protein_coding	13.7271	13.7795	13.5971	15.1276	16.3385	15.1393	16.7982	15.8945	15.9742	0.0011641	0.00932572
ENSG00000168101	NUDT16L1	ENST00000586536;ENST00000304301;ENST00000405142;ENST00000590460;ENST00000586252	nudix hydrolase 16 like 1 [Source:HGNC Symbol;Acc:HGNC:28154]	protein_coding	21.0935	22.1149	23.7692	19.6784	20.1138	20.0879	19.1788	17.4553	17.3993	0.00116357	0.00932572
ENSG00000170633	RNF34	ENST00000613529;ENST00000553407;ENST00000361234;ENST00000392465;ENST00000554868;ENST00000555076;ENST00000554606;ENST00000556562;ENST00000554484;ENST00000392464	ring finger protein 34 [Source:HGNC Symbol;Acc:HGNC:17297]	protein_coding;retained_intron	9.93187	9.06763	9.02647	8.00336	8.39876	8.23643	7.60613	7.56698	8.01023	0.0012176	0.00968552
ENSG00000227218	ENSG00000227218	ENST00000415141;ENST00000591408;ENST00000592240	novel transcript	lncRNA	0.446855	1.3018	0.689967	1.62183	1.27125	1.37079	1.86234	1.65799	1.83467	0.0012354	0.0098117
ENSG00000123485	HJURP	ENST00000411486;ENST00000432087;ENST00000453122;ENST00000373395	Holliday junction recognition protein [Source:HGNC Symbol;Acc:HGNC:25444]	protein_coding;nonsense_mediated_decay;retained_intron	9.92539	10.3652	8.93907	9.04073	9.25755	9.07503	8.08242	7.94093	7.74918	0.00124409	0.0098678
ENSG00000101986	ABCD1	ENST00000218104;ENST00000443684;ENST00000370129	ATP binding cassette subfamily D member 1 [Source:HGNC Symbol;Acc:HGNC:61]	protein_coding;processed_transcript	13.178	12.565	13.4186	15.1974	13.8988	14.1456	15.4505	15.6418	15.083	0.0012493	0.00989632
ENSG00000176658	MYO1D	ENST00000579584;ENST00000318217;ENST00000623444;ENST00000577352;ENST00000582217;ENST00000585094;ENST00000583611;ENST00000582751;ENST00000580547;ENST00000583621;ENST00000580538;ENST00000394649	myosin ID [Source:HGNC Symbol;Acc:HGNC:7598]	protein_coding;TEC;retained_intron;processed_transcript	10.9908	10.8216	10.4936	9.66193	9.12399	9.78119	9.10263	9.2618	8.19364	0.0012694	0.0100243
ENSG00000136717	BIN1	ENST00000409400;ENST00000462958;ENST00000316724;ENST00000346226;ENST00000484253;ENST00000466111;ENST00000393040;ENST00000348750;ENST00000357970	bridging integrator 1 [Source:HGNC Symbol;Acc:HGNC:1052]	protein_coding;retained_intron;processed_transcript	0.306086	0.313152	0.323772	0.478099	0.396596	0.447529	0.612039	0.48457	0.606362	0.00127586	0.0100597
ENSG00000124107	SLPI	ENST00000338380	secretory leukocyte peptidase inhibitor [Source:HGNC Symbol;Acc:HGNC:11092]	protein_coding	10.4547	12.4399	13.761	12.7587	16.0305	15.6225	20.8607	17.41	20.2595	0.0012961	0.0101809
ENSG00000007968	E2F2	ENST00000361729;ENST00000487237	E2F transcription factor 2 [Source:HGNC Symbol;Acc:HGNC:3114]	protein_coding;processed_transcript	4.93991	4.83035	5.45739	4.54984	4.83804	4.81471	4.0961	3.73595	4.04524	0.00129878	0.0101929
ENSG00000052802	MSMO1	ENST00000393766;ENST00000261507;ENST00000504317;ENST00000507013	methylsterol monooxygenase 1 [Source:HGNC Symbol;Acc:HGNC:10545]	protein_coding	15.4111	13.9909	13.2774	12.3459	13.4657	12.801	11.3777	12.3022	10.0741	0.00131225	0.0102881
ENSG00000079459	FDFT1	ENST00000623368;ENST00000446331;ENST00000531249;ENST00000525900;ENST00000525954;ENST00000443614;ENST00000220584;ENST00000528812;ENST00000525571;ENST00000527045;ENST00000525607;ENST00000622850;ENST00000529521;ENST00000538689;ENST00000530664;ENST00000528729;ENST00000525777;ENST00000531733;ENST00000528643	farnesyl-diphosphate farnesyltransferase 1 [Source:HGNC Symbol;Acc:HGNC:3629]	protein_coding;processed_transcript;retained_intron;nonsense_mediated_decay	17.7789	18.3504	17.9659	16.4602	16.1599	17.0043	15.121	14.5337	15.5027	0.00131475	0.0102918
ENSG00000156026	MCU	ENST00000605416;ENST00000373053;ENST00000483185;ENST00000603118;ENST00000605597;ENST00000604679;ENST00000603649	mitochondrial calcium uniporter [Source:HGNC Symbol;Acc:HGNC:23526]	processed_transcript;protein_coding;retained_intron;nonsense_mediated_decay	8.50125	8.36714	7.50882	7.35207	7.73531	7.81204	6.65372	6.79487	6.37088	0.00131426	0.0102918
ENSG00000213096	ZNF254	ENST00000616028;ENST00000357002;ENST00000595187;ENST00000611359;ENST00000339642;ENST00000593783;ENST00000594886	zinc finger protein 254 [Source:HGNC Symbol;Acc:HGNC:13047]	protein_coding;nonsense_mediated_decay;retained_intron	3.79353	3.07329	3.18045	3.72817	4.01154	3.98353	4.02246	5.01793	3.89375	0.00132401	0.010343
ENSG00000205250	E2F4	ENST00000567007;ENST00000561904;ENST00000379378;ENST00000563238;ENST00000564718;ENST00000565226;ENST00000568693;ENST00000567228;ENST00000566368;ENST00000565849;ENST00000568485;ENST00000569573;ENST00000568839	E2F transcription factor 4 [Source:HGNC Symbol;Acc:HGNC:3118]	retained_intron;protein_coding;processed_transcript;nonsense_mediated_decay	21.6728	19.887	20.5316	19.3583	19.0443	19.9427	18.4097	16.2043	16.5938	0.0013248	0.0103439
ENSG00000203722	RAET1G	ENST00000367360;ENST00000479265;ENST00000367361	retinoic acid early transcript 1G [Source:HGNC Symbol;Acc:HGNC:16795]	protein_coding;nonsense_mediated_decay	0.510293	0.365784	0.380221	0.771301	0.819127	0.734449	0.989273	1.05414	1.03451	0.00132567	0.0103454
ENSG00000011485	PPP5C	ENST00000478046;ENST00000487483;ENST00000012443;ENST00000391919;ENST00000467902;ENST00000532058;ENST00000492109;ENST00000527623;ENST00000527193;ENST00000525507;ENST00000486994;ENST00000467502;ENST00000491003;ENST00000493347;ENST00000595055	protein phosphatase 5 catalytic subunit [Source:HGNC Symbol;Acc:HGNC:9322]	nonsense_mediated_decay;retained_intron;protein_coding	17.0093	16.1937	16.354	15.0031	15.3287	15.4323	14.4289	13.3793	14.2227	0.00132636	0.0103455
ENSG00000117262	GPR89A	ENST00000460277;ENST00000313835;ENST00000524525;ENST00000462900;ENST00000465185;ENST00000478703;ENST00000532574;ENST00000534502;ENST00000493684;ENST00000466593;ENST00000527989;ENST00000492401	G protein-coupled receptor 89A [Source:HGNC Symbol;Acc:HGNC:31984]	nonsense_mediated_decay;protein_coding;retained_intron;processed_transcript	3.16954	4.26089	2.67382	5.69588	4.57101	4.25729	4.15096	5.68479	4.38328	0.00133652	0.0104088
ENSG00000272476	ENSG00000272476	ENST00000606070	novel transcript, antisense to SEC63	lncRNA	0.428241	0.288193	0.472763	0.886975	0.613285	0.476961	0.957354	0.887783	0.86699	0.001343	0.0104485
ENSG00000166337	TAF10	ENST00000299424;ENST00000616342;ENST00000531760;ENST00000693612;ENST00000532344	TATA-box binding protein associated factor 10 [Source:HGNC Symbol;Acc:HGNC:11543]	protein_coding;retained_intron;processed_transcript;nonsense_mediated_decay	2.60064	2.71202	3.02595	4.02436	3.2745	2.854	3.64958	3.86422	4.12548	0.00135136	0.0104815
ENSG00000266094	RASSF5	ENST00000579942;ENST00000579436;ENST00000581503;ENST00000581888;ENST00000580449;ENST00000577571;ENST00000605120	Ras association domain family member 5 [Source:HGNC Symbol;Acc:HGNC:17609]	retained_intron;protein_coding	0.534632	0.657566	0.631725	0.793826	0.787204	0.804371	0.939262	1.08997	0.94085	0.00135809	0.0105229
ENSG00000164211	STARD4	ENST00000296632;ENST00000511137;ENST00000508215;ENST00000502322;ENST00000505803;ENST00000512160;ENST00000510346;ENST00000509887	StAR related lipid transfer domain containing 4 [Source:HGNC Symbol;Acc:HGNC:18058]	protein_coding;nonsense_mediated_decay;retained_intron;processed_transcript	1.05566	1.0761	0.975983	0.674117	0.706636	0.886717	0.546914	0.603462	0.642571	0.00136394	0.0105575
ENSG00000176920	FUT2	ENST00000425340;ENST00000522283;ENST00000522966	fucosyltransferase 2 [Source:HGNC Symbol;Acc:HGNC:4013]	protein_coding;processed_transcript	0.447201	0.47166	0.439609	0.189235	0.294482	0.0317203	0.151066	0.0890599	0.0618758	0.00136622	0.0105669
ENSG00000280417	ENSG00000280417	ENST00000623443	TEC	TEC	0.537584	0.451638	0.609674	0.77128	0.77125	0.844279	1.30929	0.908874	1.19953	0.00136723	0.0105669
ENSG00000239887	C1orf226	ENST00000458626;ENST00000426197	chromosome 1 open reading frame 226 [Source:HGNC Symbol;Acc:HGNC:34351]	protein_coding	11.3218	10.3705	11.4654	10.7838	8.95385	9.76392	9.36077	8.49928	8.4417	0.00137335	0.0106075
ENSG00000197822	OCLN	ENST00000680784;ENST00000396442;ENST00000355237;ENST00000680098;ENST00000680496;ENST00000538151;ENST00000681586;ENST00000681889;ENST00000510666;ENST00000681041;ENST00000514370;ENST00000681588;ENST00000680027	occludin [Source:HGNC Symbol;Acc:HGNC:8104]	protein_coding;retained_intron;processed_transcript;nonsense_mediated_decay	8.85752	9.09827	8.54547	9.83217	9.86766	10.2421	9.74692	10.493	9.55987	0.00137667	0.0106184
ENSG00000206341	HLA-H	ENST00000383620	major histocompatibility complex, class I, H (pseudogene) [Source:HGNC Symbol;Acc:HGNC:4965]	unprocessed_pseudogene	28.1191	33.7994	29.8007	39.581	32.9791	34.2017	35.4884	38.8736	39.3805	0.00138208	0.0106493
ENSG00000151929	BAG3	ENST00000369085;ENST00000450186	BAG cochaperone 3 [Source:HGNC Symbol;Acc:HGNC:939]	protein_coding	65.5326	58.6964	60.4472	58.2754	57.7535	60.0905	52.1891	51.7152	52.1417	0.00138444	0.0106621
ENSG00000120254	MTHFD1L	ENST00000367321;ENST00000611279;ENST00000423867;ENST00000618312;ENST00000421497;ENST00000367307;ENST00000478643;ENST00000420192;ENST00000441122;ENST00000367308;ENST00000450635;ENST00000453602	methylenetetrahydrofolate dehydrogenase (NADP+ dependent) 1 like [Source:HGNC Symbol;Acc:HGNC:21055]	protein_coding;processed_transcript;nonsense_mediated_decay	11.1981	11.476	11.6999	11.1661	9.91055	9.6892	9.46857	8.78347	9.30756	0.00139697	0.0107206
ENSG00000245571	FAM111A-DT	ENST00000531708;ENST00000532845;ENST00000658798;ENST00000533220	FAM111A divergent transcript [Source:HGNC Symbol;Acc:HGNC:53752]	lncRNA	0.831818	0.968615	1.06787	1.22677	1.24745	1.20245	1.75436	1.73987	1.43207	0.00140122	0.0107424
ENSG00000213619	NDUFS3	ENST00000677462;ENST00000533507;ENST00000531351;ENST00000263774;ENST00000528192;ENST00000534716;ENST00000527178;ENST00000529276;ENST00000533105;ENST00000678975;ENST00000525212;ENST00000534208;ENST00000524568;ENST00000525378	NADH:ubiquinone oxidoreductase core subunit S3 [Source:HGNC Symbol;Acc:HGNC:7710]	retained_intron;processed_transcript;protein_coding	11.4845	12.391	12.183	11.5754	10.943	9.91921	9.50907	8.872	10.1212	0.00141684	0.010835
ENSG00000106628	POLD2	ENST00000698963;ENST00000223361;ENST00000698990;ENST00000698945;ENST00000698986;ENST00000698946;ENST00000698967;ENST00000436400;ENST00000418438;ENST00000452185;ENST00000698961;ENST00000698994;ENST00000698975;ENST00000481763;ENST00000698947;ENST00000698954;ENST00000698992;ENST00000698964;ENST00000464871;ENST00000698962;ENST00000433715;ENST00000610533;ENST00000698966;ENST00000698979;ENST00000698958…	DNA polymerase delta 2, accessory subunit [Source:HGNC Symbol;Acc:HGNC:9176]	retained_intron;protein_coding;processed_transcript;nonsense_mediated_decay	9.88425	9.79654	10.3586	8.84007	9.11076	9.38895	8.54541	8.34163	7.92412	0.00144948	0.0110347
ENSG00000171792	RHNO1	ENST00000618250;ENST00000623153;ENST00000461997;ENST00000464682;ENST00000489288;ENST00000538636;ENST00000535978;ENST00000366285	RAD9-HUS1-RAD1 interacting nuclear orphan 1 [Source:HGNC Symbol;Acc:HGNC:28206]	protein_coding;TEC;processed_transcript;nonsense_mediated_decay	18.46	16.0245	16.4825	15.0142	15.1213	15.5639	13.3727	14.2912	13.7676	0.00145972	0.0111071
ENSG00000169184	MN1	ENST00000302326	MN1 proto-oncogene, transcriptional regulator [Source:HGNC Symbol;Acc:HGNC:7180]	protein_coding	0.311978	0.212447	0.276775	0.351621	0.442517	0.369534	0.495179	0.482619	0.479827	0.00146157	0.0111101
ENSG00000041515	MYO16	ENST00000457511;ENST00000375857;ENST00000251041	myosin XVI [Source:HGNC Symbol;Acc:HGNC:29822]	protein_coding;retained_intron	0.313173	0.253014	0.208611	0.260895	0.351855	0.38264	0.453187	0.505082	0.471432	0.00146133	0.0111101
ENSG00000126821	SGPP1	ENST00000247225	sphingosine-1-phosphate phosphatase 1 [Source:HGNC Symbol;Acc:HGNC:17720]	protein_coding	8.96916	8.63788	9.46046	10.0669	10.2665	9.596	10.5944	11.1574	10.6147	0.0014674	0.0111357
ENSG00000062282	DGAT2	ENST00000376262;ENST00000603363;ENST00000228027;ENST00000605099;ENST00000604935;ENST00000603865;ENST00000605608	diacylglycerol O-acyltransferase 2 [Source:HGNC Symbol;Acc:HGNC:16940]	protein_coding;retained_intron;processed_transcript	3.07732	2.9162	3.13694	3.60066	3.68272	3.73075	3.55171	3.51189	3.44209	0.00147513	0.0111853
ENSG00000100075	SLC25A1	ENST00000451283;ENST00000215882;ENST00000470922;ENST00000468824;ENST00000461267	solute carrier family 25 member 1 [Source:HGNC Symbol;Acc:HGNC:10979]	protein_coding;retained_intron;processed_transcript	51.5978	50.6281	51.4449	50.728	47.7529	47.9969	43.2716	43.615	42.9471	0.00151115	0.0114074
ENSG00000197417	SHPK	ENST00000225519	sedoheptulokinase [Source:HGNC Symbol;Acc:HGNC:1492]	protein_coding	11.06	12.061	11.4789	10.1436	9.29247	10.2183	9.13939	10.1491	8.80157	0.00159221	0.0119134
ENSG00000163131	CTSS	ENST00000368985;ENST00000681357;ENST00000679582;ENST00000480760;ENST00000607427;ENST00000681728;ENST00000681863;ENST00000680288;ENST00000680931;ENST00000680466	cathepsin S [Source:HGNC Symbol;Acc:HGNC:2545]	protein_coding;retained_intron;nonsense_mediated_decay	0.0997579	0.0795539	0.117616	0.150522	0.153755	0.172152	0.223426	0.32588	0.198155	0.00161107	0.0120482
ENSG00000070010	UFD1	ENST00000399523;ENST00000263202;ENST00000447868;ENST00000459854;ENST00000474226;ENST00000466373;ENST00000489406;ENST00000494054;ENST00000421968;ENST00000484101	ubiquitin recognition factor in ER associated degradation 1 [Source:HGNC Symbol;Acc:HGNC:12520]	protein_coding;retained_intron;processed_transcript	9.62747	10.6279	9.38284	9.17654	9.16371	9.25776	8.44829	8.13372	7.83924	0.00161295	0.0120564
ENSG00000117115	PADI2	ENST00000375486;ENST00000375481;ENST00000479534;ENST00000466151	peptidyl arginine deiminase 2 [Source:HGNC Symbol;Acc:HGNC:18341]	protein_coding;processed_transcript	6.60575	6.2999	6.01341	5.26248	5.87557	5.02462	5.37065	4.89286	4.97419	0.00162005	0.0120917
ENSG00000100324	TAB1	ENST00000216160;ENST00000461775;ENST00000490819;ENST00000488859;ENST00000473613;ENST00000331454;ENST00000473491	TGF-beta activated kinase 1 (MAP3K7) binding protein 1 [Source:HGNC Symbol;Acc:HGNC:18157]	protein_coding;retained_intron;processed_transcript	4.64952	4.42927	4.49366	4.10153	4.49648	3.84351	3.49781	3.10459	3.35796	0.00163269	0.0121741
ENSG00000132470	ITGB4	ENST00000449880;ENST00000579662;ENST00000200181;ENST00000450894;ENST00000584374;ENST00000580542;ENST00000583327;ENST00000584939;ENST00000584025;ENST00000578318;ENST00000584558;ENST00000579211	integrin subunit beta 4 [Source:HGNC Symbol;Acc:HGNC:6158]	protein_coding;processed_transcript;retained_intron	50.0562	44.291	48.1426	46.2354	41.7925	43.8974	40.8431	38.4376	39.9382	0.001636	0.0121928
ENSG00000198920	KIAA0753	ENST00000361413;ENST00000570790;ENST00000575027;ENST00000572235;ENST00000570455;ENST00000542826;ENST00000576281;ENST00000576823;ENST00000571642;ENST00000572370	KIAA0753 [Source:HGNC Symbol;Acc:HGNC:29110]	protein_coding;nonsense_mediated_decay;processed_transcript;retained_intron	4.21104	4.1234	3.87719	4.37015	4.34428	5.21102	5.27518	5.1298	4.84211	0.00166304	0.0123498
ENSG00000144566	RAB5A	ENST00000273047;ENST00000446547;ENST00000476544;ENST00000473608;ENST00000443878;ENST00000412966;ENST00000469122;ENST00000422242	RAB5A, member RAS oncogene family [Source:HGNC Symbol;Acc:HGNC:9783]	protein_coding;nonsense_mediated_decay;retained_intron	29.4188	28.7884	28.7662	29.6281	33.2051	33.1383	33.1115	36.3736	31.965	0.00166355	0.0123498
ENSG00000119922	IFIT2	ENST00000680954;ENST00000371826;ENST00000679755;ENST00000680381	interferon induced protein with tetratricopeptide repeats 2 [Source:HGNC Symbol;Acc:HGNC:5409]	protein_coding	23.8593	22.023	22.7572	26.2429	25.4226	27.195	23.9033	25.3346	23.5697	0.00168239	0.0124715
ENSG00000072571	HMMR	ENST00000353866;ENST00000393915;ENST00000522094;ENST00000521108;ENST00000520345;ENST00000517936	hyaluronan mediated motility receptor [Source:HGNC Symbol;Acc:HGNC:5012]	protein_coding;retained_intron	12.7934	12.0375	11.9374	11.0035	12.1904	11.4496	10.0894	10.4723	9.75823	0.00168704	0.0124998
ENSG00000169564	PCBP1	ENST00000303577	poly(rC) binding protein 1 [Source:HGNC Symbol;Acc:HGNC:8647]	protein_coding	268.666	270.478	269.121	242.7	239.329	246.21	231.645	229.43	245.166	0.00169252	0.0125344
ENSG00000119638	NEK9	ENST00000238616;ENST00000677700;ENST00000555405;ENST00000555763;ENST00000555961;ENST00000555537	NIMA related kinase 9 [Source:HGNC Symbol;Acc:HGNC:18591]	protein_coding;nonsense_mediated_decay;retained_intron;processed_transcript	0.134385	0.148286	0.0637574	0.0645108	0.0363121	0.0350045	0.0519526	0.0370544	0.0315391	0.00170236	0.0126011
ENSG00000032219	ARID4A	ENST00000395168;ENST00000431317;ENST00000355431;ENST00000348476;ENST00000466065;ENST00000431612;ENST00000553355;ENST00000469635;ENST00000424658;ENST00000417477	AT-rich interaction domain 4A [Source:HGNC Symbol;Acc:HGNC:9885]	protein_coding;retained_intron;nonsense_mediated_decay;processed_transcript	5.03593	5.036	5.03984	5.52495	5.8285	5.67467	5.80032	5.66679	6.43034	0.00170865	0.0126354
ENSG00000135709	KIAA0513	ENST00000538274;ENST00000567328;ENST00000566428;ENST00000683363;ENST00000562564;ENST00000562388	KIAA0513 [Source:HGNC Symbol;Acc:HGNC:29058]	protein_coding;retained_intron	7.34967	7.41143	7.33185	8.35046	7.40791	8.17737	9.26831	8.29135	8.49953	0.00173681	0.0128168
ENSG00000109099	PMP22	ENST00000674673;ENST00000312280;ENST00000675551;ENST00000643451;ENST00000676221;ENST00000471150;ENST00000674947;ENST00000580497;ENST00000644020;ENST00000494511;ENST00000426385;ENST00000395938;ENST00000395936;ENST00000646419;ENST00000675808	peripheral myelin protein 22 [Source:HGNC Symbol;Acc:HGNC:9118]	protein_coding;nonsense_mediated_decay;retained_intron	1.04319	1.15216	1.0929	0.748147	0.689259	0.812965	0.720341	0.773275	0.752409	0.00181466	0.0132968
ENSG00000089195	TRMT6	ENST00000453074;ENST00000466974;ENST00000203001;ENST00000473131;ENST00000493972	tRNA methyltransferase 6 non-catalytic subunit [Source:HGNC Symbol;Acc:HGNC:20900]	protein_coding;processed_transcript	5.76237	5.07903	5.63775	4.96666	5.46155	4.459	4.2365	3.6374	4.0543	0.0018269	0.0133736
ENSG00000033800	PIAS1	ENST00000249636;ENST00000563996;ENST00000611270;ENST00000567417;ENST00000564009;ENST00000562190;ENST00000545237;ENST00000564915	protein inhibitor of activated STAT 1 [Source:HGNC Symbol;Acc:HGNC:2752]	protein_coding;nonsense_mediated_decay;processed_transcript;retained_intron	5.8539	5.41076	5.68578	5.13261	5.34185	5.61776	4.71368	4.75805	4.52334	0.00183051	0.0133936
ENSG00000081692	JMJD4	ENST00000485807;ENST00000438896;ENST00000620518;ENST00000480590;ENST00000465251	jumonji domain containing 4 [Source:HGNC Symbol;Acc:HGNC:25724]	retained_intron;protein_coding	4.18618	4.40203	4.26766	4.65775	4.45424	4.90192	5.29573	5.90116	5.30543	0.00185638	0.0135374
ENSG00000102178	UBL4A	ENST00000369660;ENST00000417913;ENST00000477777;ENST00000481237	ubiquitin like 4A [Source:HGNC Symbol;Acc:HGNC:12505]	protein_coding;nonsense_mediated_decay;processed_transcript;retained_intron	25.8562	25.8364	24.6533	22.3539	23.8392	21.8031	20.7924	21.4374	20.8387	0.00185778	0.0135411
ENSG00000183828	NUDT14	ENST00000550912;ENST00000392568;ENST00000551024;ENST00000550002;ENST00000339418;ENST00000546553	nudix hydrolase 14 [Source:HGNC Symbol;Acc:HGNC:20141]	processed_transcript;protein_coding;retained_intron;nonsense_mediated_decay	8.33615	8.94427	8.00669	7.53673	6.98564	7.44847	6.18203	5.86905	5.97685	0.0018831	0.0136929
ENSG00000105516	DBP	ENST00000594723;ENST00000222122;ENST00000593500;ENST00000601104	D-box binding PAR bZIP transcription factor [Source:HGNC Symbol;Acc:HGNC:2697]	retained_intron;protein_coding	3.28861	3.43154	3.87801	4.62144	4.08345	3.49705	4.28143	4.67006	4.7854	0.00189751	0.0137845
ENSG00000262576	PCDHGA4	ENST00000571252;ENST00000612927	protocadherin gamma subfamily A, 4 [Source:HGNC Symbol;Acc:HGNC:8702]	protein_coding	0.596445	0.780162	0.53169	0.270296	0.370159	0.662693	0.250579	0.290743	0.282278	0.00190827	0.013844
ENSG00000119689	DLST	ENST00000555071;ENST00000334220;ENST00000555190;ENST00000554806;ENST00000556582;ENST00000556460;ENST00000557012;ENST00000555459;ENST00000556190;ENST00000550473;ENST00000238671;ENST00000555492;ENST00000554612;ENST00000555089;ENST00000555988	dihydrolipoamide S-succinyltransferase [Source:HGNC Symbol;Acc:HGNC:2911]	retained_intron;protein_coding;processed_transcript;nonsense_mediated_decay	37.5549	37.3265	40.0061	35.37	36.2335	37.2079	30.7676	32.869	32.9765	0.00190847	0.013844
ENSG00000184160	ADRA2C	ENST00000330055	adrenoceptor alpha 2C [Source:HGNC Symbol;Acc:HGNC:283]	protein_coding	3.66153	3.72507	4.53287	5.53919	5.30668	4.64176	5.92051	5.73351	5.8978	0.0019638	0.0141782
ENSG00000213024	NUP62	ENST00000600935;ENST00000600583;ENST00000700474;ENST00000700476;ENST00000700473;ENST00000599560;ENST00000352066;ENST00000597029;ENST00000422090;ENST00000700478;ENST00000596217;ENST00000596437;ENST00000595373;ENST00000599567;ENST00000594673;ENST00000601665;ENST00000598301;ENST00000597814;ENST00000595761;ENST00000599186;ENST00000600645;ENST00000599788;ENST00000593652	nucleoporin 62 [Source:HGNC Symbol;Acc:HGNC:8066]	protein_coding;processed_transcript	26.5709	25.2914	26.2116	23.7727	23.5001	24.4699	21.7132	22.5693	21.9827	0.00197102	0.0142146
ENSG00000149503	INCENP	ENST00000394818;ENST00000278849;ENST00000533896;ENST00000528375;ENST00000528037	inner centromere protein [Source:HGNC Symbol;Acc:HGNC:6058]	protein_coding;retained_intron	18.5733	17.3475	18.3854	17.8298	16.0007	16.4644	15.6036	14.4821	14.7992	0.00197986	0.0142604
ENSG00000177398	UMODL1	ENST00000484712;ENST00000400427;ENST00000400423;ENST00000484174;ENST00000400424	uromodulin like 1 [Source:HGNC Symbol;Acc:HGNC:12560]	processed_transcript;protein_coding	0.0487573	0.028779	0.0386702	0.0990296	0.0334575	0.072716	0.121692	0.13988	0.145771	0.00208073	0.0148954
ENSG00000197283	SYNGAP1	ENST00000629380;ENST00000418600;ENST00000293748;ENST00000646630;ENST00000428982;ENST00000449372;ENST00000628646;ENST00000638142;ENST00000470232;ENST00000636146;ENST00000637587;ENST00000636640;ENST00000638127;ENST00000637194;ENST00000636075;ENST00000637911;ENST00000636731;ENST00000479510;ENST00000644458;ENST00000636193;ENST00000637721;ENST00000637671;ENST00000636436;ENST00000645250;ENST00000637490	synaptic Ras GTPase activating protein 1 [Source:HGNC Symbol;Acc:HGNC:11497]	protein_coding;nonsense_mediated_decay;retained_intron;processed_transcript	5.22638	5.52354	5.45232	6.13389	5.71169	5.63113	6.70412	6.08308	6.51576	0.00209083	0.0149397
ENSG00000115109	EPB41L5	ENST00000452780;ENST00000263713;ENST00000443124;ENST00000331393;ENST00000489017;ENST00000443902;ENST00000495030;ENST00000466241;ENST00000488691;ENST00000461128	erythrocyte membrane protein band 4.1 like 5 [Source:HGNC Symbol;Acc:HGNC:19819]	protein_coding;processed_transcript;retained_intron	16.3907	15.4749	14.8634	17.3868	18.0828	18.8197	16.6071	17.8518	16.0639	0.00211581	0.015104
ENSG00000269386	RAB11B-AS1	ENST00000593581;ENST00000597785;ENST00000597407	RAB11B antisense RNA 1 [Source:HGNC Symbol;Acc:HGNC:44178]	lncRNA	0.73201	1.15933	0.944495	1.52781	1.16337	1.40103	1.95184	1.77434	2.19946	0.00212799	0.0151839
ENSG00000157036	EXOG	ENST00000287675;ENST00000447573;ENST00000457367;ENST00000412107;ENST00000431472;ENST00000474071;ENST00000489813;ENST00000450732;ENST00000453767;ENST00000454803;ENST00000483749;ENST00000438992;ENST00000436414;ENST00000443942	exo/endonuclease G [Source:HGNC Symbol;Acc:HGNC:3347]	protein_coding;nonsense_mediated_decay;retained_intron	0.910746	1.0434	1.08444	0.742698	0.876149	0.89412	0.499207	0.607357	0.636059	0.00215244	0.0153081
ENSG00000008294	SPAG9	ENST00000510283;ENST00000357122;ENST00000262013;ENST00000513906;ENST00000511312;ENST00000506500;ENST00000509724;ENST00000511987;ENST00000514613;ENST00000510855;ENST00000513827;ENST00000505173;ENST00000506483;ENST00000515685;ENST00000502329;ENST00000514205	sperm associated antigen 9 [Source:HGNC Symbol;Acc:HGNC:14524]	protein_coding;retained_intron;processed_transcript	10.4549	10.7196	9.71276	10.7216	10.8569	10.8055	11.7253	11.3381	11.4687	0.00215568	0.0153151
ENSG00000107745	MICU1	ENST00000361114;ENST00000604238;ENST00000604025;ENST00000603011;ENST00000476605;ENST00000604529;ENST00000398763;ENST00000642044	mitochondrial calcium uptake 1 [Source:HGNC Symbol;Acc:HGNC:1530]	protein_coding;retained_intron;nonsense_mediated_decay	15.2746	15.7607	14.0749	13.6818	13.7388	14.4477	12.2082	11.9044	12.8128	0.00220553	0.0156201
ENSG00000110108	TMEM109	ENST00000227525;ENST00000536171	transmembrane protein 109 [Source:HGNC Symbol;Acc:HGNC:28771]	protein_coding	55.3541	54.4152	55.0449	52.4718	53.0522	52.6697	48.1983	47.231	46.5043	0.00222069	0.0157202
ENSG00000182749	PAQR7	ENST00000675840;ENST00000374296	progestin and adipoQ receptor family member 7 [Source:HGNC Symbol;Acc:HGNC:23146]	protein_coding	3.85213	4.56875	4.17124	4.59457	4.49357	4.56493	5.44862	5.49039	5.67355	0.00223541	0.015817
ENSG00000137965	IFI44	ENST00000472152;ENST00000370747;ENST00000495254;ENST00000470323;ENST00000467790;ENST00000485662;ENST00000476911;ENST00000438486;ENST00000446486	interferon induced protein 44 [Source:HGNC Symbol;Acc:HGNC:16938]	processed_transcript;protein_coding;retained_intron	38.7778	39.9409	38.6248	43.9897	48.0539	44.2838	41.4541	41.7834	39.9498	0.00230691	0.0162851
ENSG00000089157	RPLP0	ENST00000547475;ENST00000550856;ENST00000546564;ENST00000392514;ENST00000547173;ENST00000313104;ENST00000551258;ENST00000546990;ENST00000551150;ENST00000552461;ENST00000546989;ENST00000549098;ENST00000228306;ENST00000552292;ENST00000548568;ENST00000547191;ENST00000548495;ENST00000547211;ENST00000551783;ENST00000548551;ENST00000550296;ENST00000552902;ENST00000551914;ENST00000549242;ENST00000551336…	ribosomal protein lateral stalk subunit P0 [Source:HGNC Symbol;Acc:HGNC:10371]	nonsense_mediated_decay;protein_coding;retained_intron;processed_transcript	272.718	297.226	288.638	262.687	260.921	258.051	250.651	251.148	273.544	0.00235789	0.0165836
ENSG00000173805	HAP1	ENST00000393939;ENST00000458656;ENST00000347901;ENST00000310778;ENST00000341193	huntingtin associated protein 1 [Source:HGNC Symbol;Acc:HGNC:4812]	protein_coding	0.149534	0.0796031	0.0748982	0.137753	0.119863	0.203367	0.250565	0.2737	0.27647	0.00236078	0.0165962
ENSG00000159210	SNF8	ENST00000514929;ENST00000290330;ENST00000502492;ENST00000504000;ENST00000509989;ENST00000576353;ENST00000515572;ENST00000512243;ENST00000507302;ENST00000515174;ENST00000510558;ENST00000510195;ENST00000506104;ENST00000511214;ENST00000514089	SNF8 subunit of ESCRT-II [Source:HGNC Symbol;Acc:HGNC:17028]	nonsense_mediated_decay;protein_coding;retained_intron;processed_transcript	8.0072	9.11905	9.30618	9.38236	9.72745	9.53566	10.8052	10.3591	10.5983	0.00236671	0.0166226
ENSG00000119950	MXI1	ENST00000652323;ENST00000332674;ENST00000239007;ENST00000651557;ENST00000369612;ENST00000650752;ENST00000393134;ENST00000650952;ENST00000650810;ENST00000484030;ENST00000453116;ENST00000442296;ENST00000651109;ENST00000460667;ENST00000652463;ENST00000361248;ENST00000651318	MAX interactor 1, dimerization protein [Source:HGNC Symbol;Acc:HGNC:7534]	nonsense_mediated_decay;protein_coding	5.09583	5.0694	5.03909	5.22554	5.72961	5.81598	6.19572	5.69607	6.17344	0.0024394	0.0170467
ENSG00000100804	PSMB5	ENST00000361611;ENST00000425762;ENST00000334454;ENST00000493471;ENST00000460922	proteasome 20S subunit beta 5 [Source:HGNC Symbol;Acc:HGNC:9542]	protein_coding;nonsense_mediated_decay	101.635	115.498	114.568	108.16	105.316	96.8465	90.7507	90.8701	92.9446	0.00247008	0.0172216
ENSG00000229644	NAMPTP1	ENST00000440465	nicotinamide phosphoribosyltransferase pseudogene 1 [Source:HGNC Symbol;Acc:HGNC:17633]	processed_pseudogene	6.38372	6.11934	6.65371	7.28237	7.62499	7.00909	7.94625	8.67282	8.20789	0.00247941	0.0172708
ENSG00000137106	GRHPR	ENST00000377824;ENST00000460882;ENST00000318158;ENST00000493368;ENST00000497693;ENST00000487399;ENST00000494290;ENST00000491488;ENST00000512404;ENST00000607784;ENST00000480596;ENST00000482603	glyoxylate and hydroxypyruvate reductase [Source:HGNC Symbol;Acc:HGNC:4570]	retained_intron;processed_transcript;protein_coding;nonsense_mediated_decay	8.29305	8.55825	7.41061	7.1995	7.1014	7.58598	6.41015	6.47761	6.85857	0.00248905	0.0173143
ENSG00000009413	REV3L	ENST00000422377;ENST00000368802;ENST00000494858;ENST00000462119;ENST00000435970;ENST00000467500;ENST00000434009;ENST00000460981;ENST00000358835;ENST00000470871;ENST00000492520;ENST00000413831	REV3 like, DNA directed polymerase zeta catalytic subunit [Source:HGNC Symbol;Acc:HGNC:9968]	nonsense_mediated_decay;protein_coding;retained_intron;processed_transcript	7.13989	7.1534	7.08083	7.05023	7.67361	7.604	8.32069	8.14688	8.06586	0.00249201	0.017327
ENSG00000162191	UBXN1	ENST00000529640;ENST00000525717;ENST00000436354;ENST00000532904;ENST00000294119;ENST00000524762;ENST00000533476;ENST00000301935;ENST00000534176;ENST00000528907;ENST00000533000;ENST00000526919;ENST00000533908;ENST00000531056;ENST00000531625;ENST00000616865;ENST00000527421	UBX domain protein 1 [Source:HGNC Symbol;Acc:HGNC:18402]	protein_coding;retained_intron;processed_transcript	26.5067	26.0388	26.9679	28.5389	28.8124	28.8785	33.0808	28.9072	30.8567	0.00250182	0.0173793
ENSG00000168002	POLR2G	ENST00000525455;ENST00000527435;ENST00000301788;ENST00000524819;ENST00000531944;ENST00000533442;ENST00000526368;ENST00000531996	RNA polymerase II subunit G [Source:HGNC Symbol;Acc:HGNC:9194]	nonsense_mediated_decay;retained_intron;protein_coding	41.8619	49.1294	43.6143	42.1363	40.7005	38.7729	33.0374	35.3765	39.2072	0.0025177	0.0174817
ENSG00000074603	DPP8	ENST00000395652;ENST00000321147;ENST00000559233;ENST00000300141;ENST00000341861;ENST00000358939;ENST00000560048;ENST00000560436;ENST00000560194;ENST00000558529;ENST00000559526;ENST00000560665;ENST00000560597;ENST00000558559	dipeptidyl peptidase 8 [Source:HGNC Symbol;Acc:HGNC:16490]	nonsense_mediated_decay;protein_coding;processed_transcript;retained_intron	4.17624	4.18185	4.02342	4.19316	4.41466	4.59376	4.75823	4.91156	4.70536	0.00252577	0.0175138
ENSG00000178307	TMEM11	ENST00000317635;ENST00000577419;ENST00000583929;ENST00000583264;ENST00000584732;ENST00000584432	transmembrane protein 11 [Source:HGNC Symbol;Acc:HGNC:16823]	protein_coding;processed_transcript	15.7297	16.3276	16.4047	14.3486	14.6938	14.5324	13.1192	13.6494	12.8578	0.00254855	0.0176254
ENSG00000240344	PPIL3	ENST00000392283;ENST00000286175;ENST00000465823;ENST00000409449;ENST00000457063;ENST00000443398;ENST00000409264;ENST00000409361;ENST00000497263;ENST00000492074;ENST00000487879;ENST00000463866;ENST00000415562;ENST00000470442;ENST00000497501	peptidylprolyl isomerase like 3 [Source:HGNC Symbol;Acc:HGNC:9262]	protein_coding;processed_transcript;retained_intron;nonsense_mediated_decay	8.99619	9.29353	9.22574	9.7755	10.1808	9.94722	10.7885	10.4878	11.3595	0.0025488	0.0176254
ENSG00000166136	NDUFB8	ENST00000299166;ENST00000370322;ENST00000529437;ENST00000464651;ENST00000531189;ENST00000370320;ENST00000466088;ENST00000531418	NADH:ubiquinone oxidoreductase subunit B8 [Source:HGNC Symbol;Acc:HGNC:7703]	protein_coding;retained_intron	15.7962	17.6621	16.917	15.2984	14.0314	13.8186	11.7824	12.4862	14.9562	0.00255926	0.0176687
ENSG00000114861	FOXP1	ENST00000650580;ENST00000650387;ENST00000493089;ENST00000648380;ENST00000649610;ENST00000649596;ENST00000648321;ENST00000649528;ENST00000648710;ENST00000648384;ENST00000318789;ENST00000470112;ENST00000647614;ENST00000650295;ENST00000460805;ENST00000649417;ENST00000318779;ENST00000647829;ENST00000471386;ENST00000647776;ENST00000468577;ENST00000475937;ENST00000622151;ENST00000648718;ENST00000648113…	forkhead box P1 [Source:HGNC Symbol;Acc:HGNC:3823]	retained_intron;protein_coding;nonsense_mediated_decay;processed_transcript	1.78575	1.67462	1.63547	1.83364	1.75938	1.83411	1.999	1.96077	1.9535	0.0025597	0.0176687
ENSG00000105341	DMAC2	ENST00000438807;ENST00000301183;ENST00000592922;ENST00000589503;ENST00000221943;ENST00000595425;ENST00000417807;ENST00000597608;ENST00000589102;ENST00000595407;ENST00000590641;ENST00000589970	distal membrane arm assembly component 2 [Source:HGNC Symbol;Acc:HGNC:25496]	protein_coding;retained_intron	12.0246	13.1271	12.2445	11.2563	11.409	11.6817	10.3257	10.0771	10.3391	0.00257209	0.0177301
ENSG00000158470	B4GALT5	ENST00000371711	beta-1,4-galactosyltransferase 5 [Source:HGNC Symbol;Acc:HGNC:928]	protein_coding	25.8565	25.1708	24.8707	27.0843	26.8094	25.9191	29.5155	26.4599	29.3074	0.00264576	0.0181803
ENSG00000116885	OSCP1	ENST00000356637;ENST00000235532;ENST00000354267;ENST00000528112;ENST00000475160;ENST00000445843;ENST00000525869;ENST00000471369	organic solute carrier partner 1 [Source:HGNC Symbol;Acc:HGNC:29971]	protein_coding;retained_intron;processed_transcript	1.69548	1.88938	2.18496	2.30718	2.257	2.33768	2.86576	3.08901	2.97064	0.00265847	0.018243
ENSG00000179604	CDC42EP4	ENST00000335793;ENST00000580315;ENST00000578516;ENST00000581045;ENST00000582303;ENST00000579611	CDC42 effector protein 4 [Source:HGNC Symbol;Acc:HGNC:17147]	protein_coding;processed_transcript	18.5648	17.9135	19.2491	15.5824	16.0307	15.5138	16.1733	15.9881	16.521	0.00267005	0.0183142
ENSG00000197989	SNHG12	ENST00000461448;ENST00000474814;ENST00000481368;ENST00000692541;ENST00000481220;ENST00000648327;ENST00000464115;ENST00000483436;ENST00000648251;ENST00000650259;ENST00000464612;ENST00000475441;ENST00000693199;ENST00000650239;ENST00000470977;ENST00000648127;ENST00000461832;ENST00000531126	small nucleolar RNA host gene 12 [Source:HGNC Symbol;Acc:HGNC:30062]	retained_intron;lncRNA	0.659501	0.747745	0.760636	0.881516	0.988812	0.825087	1.37194	1.11201	1.15772	0.00268147	0.0183678
ENSG00000273749	CYFIP1	ENST00000612288;ENST00000617928;ENST00000617556;ENST00000557890;ENST00000611832;ENST00000622576;ENST00000613006;ENST00000561263;ENST00000619348;ENST00000619290;ENST00000621036;ENST00000621105	cytoplasmic FMR1 interacting protein 1 [Source:HGNC Symbol;Acc:HGNC:13759]	protein_coding;retained_intron;nonsense_mediated_decay	10.5257	10.2756	9.66756	9.2679	9.77333	9.64833	8.73228	8.51554	8.70975	0.00272315	0.0185986
ENSG00000160208	RRP1B	ENST00000470886;ENST00000340648	ribosomal RNA processing 1B [Source:HGNC Symbol;Acc:HGNC:23818]	retained_intron;protein_coding	15.9493	15.6456	16.0365	14.3847	14.4914	15.742	13.5498	13.8091	12.3221	0.00273222	0.0186317
ENSG00000183742	MACC1	ENST00000589011;ENST00000332878;ENST00000400331;ENST00000483317;ENST00000471019	MET transcriptional regulator MACC1 [Source:HGNC Symbol;Acc:HGNC:30215]	protein_coding;retained_intron;processed_transcript	3.96163	3.40239	3.88478	3.98793	4.04162	4.39943	4.28017	4.72448	4.49983	0.00275946	0.0188006
ENSG00000057252	SOAT1	ENST00000540564;ENST00000539888;ENST00000367619;ENST00000426956	sterol O-acyltransferase 1 [Source:HGNC Symbol;Acc:HGNC:11177]	protein_coding	3.64101	4.10003	4.02263	4.41211	4.52122	4.59951	4.62001	4.58329	4.74334	0.00281106	0.0190924
ENSG00000114127	XRN1	ENST00000264951;ENST00000392981;ENST00000465074;ENST00000463916;ENST00000489241;ENST00000468894;ENST00000472625;ENST00000465507;ENST00000470537;ENST00000486211;ENST00000472697	5'-3' exoribonuclease 1 [Source:HGNC Symbol;Acc:HGNC:30654]	protein_coding;processed_transcript;nonsense_mediated_decay;retained_intron	2.9347	3.40659	3.07537	3.58416	3.34369	3.51871	3.73824	3.72812	3.68248	0.00291753	0.0197014
ENSG00000173821	RNF213	ENST00000508628;ENST00000582970;ENST00000319921;ENST00000411702;ENST00000573038;ENST00000572622;ENST00000560083;ENST00000560694;ENST00000558116;ENST00000559864;ENST00000574060;ENST00000571908;ENST00000573548;ENST00000570776;ENST00000427003;ENST00000559603;ENST00000574909;ENST00000559070;ENST00000573919;ENST00000558488	ring finger protein 213 [Source:HGNC Symbol;Acc:HGNC:14539]	protein_coding;retained_intron;processed_transcript	13.0425	12.8287	12.5952	14.7358	13.6633	14.2585	14.1247	14.1998	13.4216	0.00292967	0.0197571
ENSG00000091844	RGS17	ENST00000367225;ENST00000206262	regulator of G protein signaling 17 [Source:HGNC Symbol;Acc:HGNC:14088]	protein_coding	1.47501	1.44219	1.42792	1.72089	1.86679	1.64355	1.90152	2.03177	1.92388	0.00294234	0.0198338
ENSG00000112983	BRD8	ENST00000402931;ENST00000411594;ENST00000512140;ENST00000454473;ENST00000418329;ENST00000230901;ENST00000483805;ENST00000471892;ENST00000463620;ENST00000489351;ENST00000460746;ENST00000515254;ENST00000428808;ENST00000515014;ENST00000506167;ENST00000472478;ENST00000511898;ENST00000453824;ENST00000425764;ENST00000471437;ENST00000450756;ENST00000254900;ENST00000432618	bromodomain containing 8 [Source:HGNC Symbol;Acc:HGNC:19874]	protein_coding;nonsense_mediated_decay;retained_intron;processed_transcript	9.66919	10.5241	9.87946	8.91329	8.64035	8.51644	8.81465	8.07393	8.27616	0.00297068	0.0199983
ENSG00000051596	THOC3	ENST00000265097;ENST00000513482;ENST00000513118;ENST00000510300;ENST00000432305;ENST00000515016	THO complex 3 [Source:HGNC Symbol;Acc:HGNC:19072]	protein_coding;retained_intron;processed_transcript	31.3265	31.5334	31.3268	30.2916	30.7422	29.8135	26.8145	27.6704	26.9667	0.00298289	0.020068
ENSG00000198792	TMEM184B	ENST00000436674;ENST00000361684;ENST00000633056;ENST00000361906;ENST00000633438;ENST00000488844;ENST00000411679;ENST00000474416;ENST00000403210;ENST00000457534;ENST00000466117	transmembrane protein 184B [Source:HGNC Symbol;Acc:HGNC:1310]	nonsense_mediated_decay;protein_coding;retained_intron;processed_transcript	11.4652	11.4987	12.1142	12.6899	12.1499	12.5253	14.0307	12.8019	13.6714	0.00300016	0.0201433
ENSG00000064547	LPAR2	ENST00000586703;ENST00000542587;ENST00000407877;ENST00000592061;ENST00000590629;ENST00000588233;ENST00000591042	lysophosphatidic acid receptor 2 [Source:HGNC Symbol;Acc:HGNC:3168]	protein_coding;retained_intron	10.3327	10.2365	10.1614	11.8829	10.546	10.5424	12.4692	11.9146	11.9174	0.0030858	0.0206184
ENSG00000153786	ZDHHC7	ENST00000564466;ENST00000313732;ENST00000344861;ENST00000569488;ENST00000566909;ENST00000569377;ENST00000564526	zinc finger DHHC-type palmitoyltransferase 7 [Source:HGNC Symbol;Acc:HGNC:18459]	protein_coding;nonsense_mediated_decay;processed_transcript;retained_intron	27.2786	27.9558	27.1781	28.9455	28.93	28.4029	31.3317	30.8025	30.5601	0.00311156	0.0207418
ENSG00000101337	TM9SF4	ENST00000495749;ENST00000217315;ENST00000398022;ENST00000450829;ENST00000417389;ENST00000479591;ENST00000442842	transmembrane 9 superfamily member 4 [Source:HGNC Symbol;Acc:HGNC:30797]	retained_intron;protein_coding;nonsense_mediated_decay;processed_transcript	41.0016	40.1465	38.2736	37.6582	36.2536	38.891	35.3649	33.8134	32.2489	0.00314333	0.0209112
ENSG00000182809	CRIP2	ENST00000329146;ENST00000551836;ENST00000483017;ENST00000552643;ENST00000547643;ENST00000538259;ENST00000551738;ENST00000550577;ENST00000548989;ENST00000548923;ENST00000548309	cysteine rich protein 2 [Source:HGNC Symbol;Acc:HGNC:2361]	protein_coding;retained_intron;processed_transcript	35.3112	35.5427	34.8651	33.7873	32.9212	32.5577	31.5722	28.2782	30.6921	0.00320273	0.0212322
ENSG00000013441	CLK1	ENST00000409403;ENST00000321356;ENST00000434813;ENST00000432425;ENST00000473565;ENST00000461981;ENST00000461326;ENST00000496205;ENST00000472679;ENST00000481641;ENST00000482590;ENST00000464454;ENST00000492793;ENST00000409769	CDC like kinase 1 [Source:HGNC Symbol;Acc:HGNC:2068]	nonsense_mediated_decay;protein_coding;retained_intron;processed_transcript	3.58441	4.10011	3.54107	4.24507	4.11199	4.28306	5.08823	4.42004	4.80449	0.00322612	0.0213353
ENSG00000133703	KRAS	ENST00000692768;ENST00000311936;ENST00000256078;ENST00000687356;ENST00000685328;ENST00000556131;ENST00000688940;ENST00000686969;ENST00000557334;ENST00000688228;ENST00000690406	KRAS proto-oncogene, GTPase [Source:HGNC Symbol;Acc:HGNC:6407]	protein_coding;nonsense_mediated_decay;retained_intron	6.85023	6.46841	6.45421	7.62343	7.97598	7.37518	7.48564	7.41128	6.8299	0.00324712	0.0214611
ENSG00000197183	NOL4L	ENST00000359676;ENST00000621426;ENST00000375678;ENST00000485364;ENST00000475781;ENST00000201961;ENST00000375677;ENST00000419612;ENST00000326071	nucleolar protein 4 like [Source:HGNC Symbol;Acc:HGNC:16106]	protein_coding;processed_transcript;nonsense_mediated_decay	4.39502	4.01462	4.03452	4.70859	4.12131	4.72177	4.92672	4.87643	4.84416	0.00325143	0.0214617
ENSG00000167118	URM1	ENST00000483206;ENST00000372850;ENST00000372853;ENST00000470840;ENST00000372847	ubiquitin related modifier 1 [Source:HGNC Symbol;Acc:HGNC:28378]	protein_coding;nonsense_mediated_decay	15.8878	16.4552	16.7842	15.2778	14.447	15.2856	14.0679	13.9437	13.0863	0.0033118	0.0217342
ENSG00000109819	PPARGC1A	ENST00000264867;ENST00000509702;ENST00000508380;ENST00000514479;ENST00000506055;ENST00000507380;ENST00000513205	PPARG coactivator 1 alpha [Source:HGNC Symbol;Acc:HGNC:9237]	protein_coding;processed_transcript;retained_intron;nonsense_mediated_decay	0.125439	0.065204	0.112289	0.151853	0.136478	0.208553	0.233791	0.193169	0.206126	0.00337713	0.0220915
ENSG00000025772	TOMM34	ENST00000372813	translocase of outer mitochondrial membrane 34 [Source:HGNC Symbol;Acc:HGNC:15746]	protein_coding	27.4448	27.7809	26.7541	25.9431	25.9726	25.5314	23.7543	23.0426	21.1018	0.00337728	0.0220915
ENSG00000135519	KCNH3	ENST00000257981;ENST00000649994;ENST00000548675;ENST00000551415;ENST00000550434	potassium voltage-gated channel subfamily H member 3 [Source:HGNC Symbol;Acc:HGNC:6252]	protein_coding;nonsense_mediated_decay;retained_intron;processed_transcript	0.828927	0.788697	0.918043	1.20688	1.21154	1.11285	1.35793	1.63354	1.12008	0.00341609	0.0222824
ENSG00000118960	HS1BP3	ENST00000445102;ENST00000651498;ENST00000304031;ENST00000402541;ENST00000406618;ENST00000446825;ENST00000458740;ENST00000631166	HCLS1 binding protein 3 [Source:HGNC Symbol;Acc:HGNC:24979]	protein_coding;nonsense_mediated_decay	2.13104	2.0206	2.29365	2.34365	2.29979	2.24794	2.693	2.38434	2.57549	0.0035125	0.0227998
ENSG00000104904	OAZ1	ENST00000588673;ENST00000593012;ENST00000581150;ENST00000582888;ENST00000592727;ENST00000590943;ENST00000602676;ENST00000586054;ENST00000592787;ENST00000589739;ENST00000589361	ornithine decarboxylase antizyme 1 [Source:HGNC Symbol;Acc:HGNC:8095]	protein_coding;retained_intron;nonsense_mediated_decay	83.9214	89.6869	87.5179	75.6073	74.8971	77.7321	78.6033	73.3205	75.7899	0.00352077	0.0228244
ENSG00000164087	POC1A	ENST00000296484;ENST00000474012;ENST00000394970	POC1 centriolar protein A [Source:HGNC Symbol;Acc:HGNC:24488]	protein_coding	7.87113	7.76868	8.49409	6.91924	5.83434	6.80113	6.06159	5.19254	6.24453	0.00354784	0.022986
ENSG00000204628	RACK1	ENST00000507756;ENST00000511473;ENST00000512805;ENST00000504128;ENST00000513060;ENST00000505461;ENST00000513027;ENST00000502844;ENST00000510199;ENST00000512968;ENST00000515417;ENST00000503494;ENST00000508682;ENST00000511566;ENST00000514183;ENST00000502548;ENST00000504325;ENST00000509148;ENST00000502905;ENST00000514455;ENST00000509535;ENST00000502890;ENST00000508044;ENST00000507261;ENST00000503081…	receptor for activated C kinase 1 [Source:HGNC Symbol;Acc:HGNC:4399]	protein_coding;nonsense_mediated_decay;retained_intron;processed_transcript	202.245	215.652	208.24	196.603	195.253	207.166	192.554	191.117	190.594	0.00360991	0.0232834
ENSG00000204131	NHSL2	ENST00000633930;ENST00000623354;ENST00000373677;ENST00000510661	NHS like 2 [Source:HGNC Symbol;Acc:HGNC:33737]	protein_coding;processed_transcript;retained_intron	0.0961728	0.0787582	0.104714	0.105677	0.150571	0.134468	0.174631	0.165509	0.173228	0.00366702	0.023572
ENSG00000104967	NOVA2	ENST00000263257;ENST00000676183;ENST00000599462	NOVA alternative splicing regulator 2 [Source:HGNC Symbol;Acc:HGNC:7887]	protein_coding;processed_transcript	0.559204	0.41511	0.561382	0.608442	0.577066	0.605118	0.832523	0.747277	0.796427	0.00367103	0.0235878
ENSG00000172062	SMN1	ENST00000351205;ENST00000506239;ENST00000506163;ENST00000503079;ENST00000380707;ENST00000514951;ENST00000507905;ENST00000510679;ENST00000513228;ENST00000518504	survival of motor neuron 1, telomeric [Source:HGNC Symbol;Acc:HGNC:11117]	protein_coding;nonsense_mediated_decay;processed_transcript;retained_intron	21.3451	26.4732	26.3176	21.3047	19.2131	21.1709	19.163	21.2021	20.108	0.00369167	0.0236705
ENSG00000107897	ACBD5	ENST00000679293;ENST00000677960;ENST00000677509;ENST00000375897;ENST00000677311;ENST00000676732;ENST00000375905;ENST00000677248;ENST00000677667;ENST00000375901;ENST00000676511;ENST00000396271;ENST00000677440;ENST00000676731;ENST00000412279;ENST00000676997;ENST00000476758;ENST00000677902;ENST00000677901;ENST00000677200;ENST00000375888;ENST00000678446;ENST00000679220;ENST00000676599;ENST00000426079	acyl-CoA binding domain containing 5 [Source:HGNC Symbol;Acc:HGNC:23338]	protein_coding;nonsense_mediated_decay;retained_intron	3.75276	4.13592	3.90985	4.1667	4.48433	4.55757	4.5857	4.64452	4.61121	0.00370601	0.0237524
ENSG00000206503	HLA-A	ENST00000376806;ENST00000496081;ENST00000495183;ENST00000479320;ENST00000396634;ENST00000376809	major histocompatibility complex, class I, A [Source:HGNC Symbol;Acc:HGNC:4931]	protein_coding;retained_intron	136.169	147.992	138.146	156.44	149.718	143.291	159.266	152.37	164.068	0.00374631	0.0239704
ENSG00000144366	GULP1	ENST00000433052;ENST00000409580;ENST00000479019;ENST00000359135;ENST00000699998;ENST00000409830;ENST00000476422;ENST00000451191;ENST00000486445;ENST00000467422;ENST00000410051;ENST00000409927;ENST00000409843;ENST00000699997;ENST00000409637;ENST00000409609;ENST00000495745;ENST00000478306	GULP PTB domain containing engulfment adaptor 1 [Source:HGNC Symbol;Acc:HGNC:18649]	protein_coding;processed_transcript;retained_intron	2.47515	2.23477	2.47317	2.56684	2.78973	2.67596	2.74102	2.90426	2.89237	0.00375864	0.0240291
ENSG00000112984	KIF20A	ENST00000394894;ENST00000502338;ENST00000503417;ENST00000504621;ENST00000511638	kinesin family member 20A [Source:HGNC Symbol;Acc:HGNC:9787]	protein_coding;nonsense_mediated_decay;retained_intron	27.9033	26.6568	27.874	24.9702	23.5236	25.0676	22.951	23.7688	23.3855	0.00376924	0.0240666
ENSG00000189377	CXCL17	ENST00000601181	C-X-C motif chemokine ligand 17 [Source:HGNC Symbol;Acc:HGNC:19232]	protein_coding	10.4128	7.77518	8.57625	11.519	10.883	11.4465	11.307	14.0972	13.0431	0.00377234	0.0240763
ENSG00000170088	TMEM192	ENST00000306480;ENST00000505095;ENST00000506087	transmembrane protein 192 [Source:HGNC Symbol;Acc:HGNC:26775]	protein_coding	4.54909	4.22732	4.02015	3.83215	3.76542	4.19606	3.48353	3.61772	3.54897	0.00378041	0.0240875
ENSG00000095380	NANS	ENST00000210444;ENST00000427646;ENST00000461452;ENST00000480925;ENST00000495319;ENST00000415280	N-acetylneuraminate synthase [Source:HGNC Symbol;Acc:HGNC:19237]	protein_coding;processed_transcript	18.6242	19.2295	18.4883	17.8876	18.5667	17.3677	16.7169	15.1859	15.8059	0.00378541	0.0241093
ENSG00000197943	PLCG2	ENST00000567980;ENST00000564138;ENST00000570198;ENST00000563375;ENST00000563193;ENST00000697564;ENST00000567373;ENST00000697585;ENST00000697586;ENST00000567356;ENST00000697563;ENST00000570196;ENST00000697565;ENST00000569929;ENST00000697582;ENST00000563269;ENST00000697562	phospholipase C gamma 2 [Source:HGNC Symbol;Acc:HGNC:9066]	retained_intron;protein_coding;nonsense_mediated_decay	1.43312	1.27221	1.20225	1.57	1.55391	1.44512	1.557	1.65449	1.49436	0.00380914	0.0242199
ENSG00000150676	CCDC83	ENST00000526729;ENST00000280245;ENST00000529676	coiled-coil domain containing 83 [Source:HGNC Symbol;Acc:HGNC:28535]	protein_coding;processed_transcript	1.36679	1.1147	1.47948	1.88173	1.83668	1.71016	1.96637	2.24405	2.28634	0.00381308	0.0242348
ENSG00000135002	RFK	ENST00000376736;ENST00000490113;ENST00000472900;ENST00000476087;ENST00000483155;ENST00000479197	riboflavin kinase [Source:HGNC Symbol;Acc:HGNC:30324]	protein_coding;processed_transcript	7.85671	7.75806	7.16294	8.15046	9.69826	9.27226	8.42891	8.96699	8.59038	0.00382427	0.0242857
ENSG00000159200	RCAN1	ENST00000482533;ENST00000381132;ENST00000313806;ENST00000381135;ENST00000609325;ENST00000487990;ENST00000481448;ENST00000492600	regulator of calcineurin 1 [Source:HGNC Symbol;Acc:HGNC:3040]	protein_coding;retained_intron	2.14108	1.97429	1.81215	2.29367	2.09904	2.29602	2.76241	2.65436	2.3814	0.00384178	0.0243664
ENSG00000178719	GRINA	ENST00000529301;ENST00000534791;ENST00000525513;ENST00000395068;ENST00000533044;ENST00000313269;ENST00000533377;ENST00000531992;ENST00000527194;ENST00000530898	glutamate ionotropic receptor NMDA type subunit associated protein 1 [Source:HGNC Symbol;Acc:HGNC:4589]	protein_coding;retained_intron	216.905	217.879	227.773	247.444	229.528	245.505	238.015	236.942	233.135	0.00390275	0.0246608
ENSG00000100316	RPL3	ENST00000401609;ENST00000465618;ENST00000402527;ENST00000467105;ENST00000216146;ENST00000484615;ENST00000484358;ENST00000481985;ENST00000471290;ENST00000461967;ENST00000473638;ENST00000427905;ENST00000459859;ENST00000460589;ENST00000420536;ENST00000498462;ENST00000464182;ENST00000453303	ribosomal protein L3 [Source:HGNC Symbol;Acc:HGNC:10332]	protein_coding;processed_transcript;retained_intron;nonsense_mediated_decay	157.293	171.198	168.602	160.311	155.763	155.743	146.343	148.852	148.808	0.00399816	0.025149
ENSG00000099901	RANBP1	ENST00000402752;ENST00000331821;ENST00000486575;ENST00000448394;ENST00000430524;ENST00000488484;ENST00000467920;ENST00000411892;ENST00000432879;ENST00000418705;ENST00000435265;ENST00000423859;ENST00000416427	RAN binding protein 1 [Source:HGNC Symbol;Acc:HGNC:9847]	protein_coding;retained_intron;processed_transcript;nonsense_mediated_decay	27.5469	26.5347	24.9364	23.0828	23.4786	23.67	21.376	21.4783	24.0784	0.0040153	0.0252359
ENSG00000105866	SP4	ENST00000649633;ENST00000222584;ENST00000440636;ENST00000448246;ENST00000432066	Sp4 transcription factor [Source:HGNC Symbol;Acc:HGNC:11209]	protein_coding;retained_intron;nonsense_mediated_decay	1.48193	1.45267	1.41947	1.72687	1.94868	1.82086	1.88324	2.18923	2.02413	0.00403682	0.0253399
ENSG00000175197	DDIT3	ENST00000346473;ENST00000552740;ENST00000547303;ENST00000551116;ENST00000623876	DNA damage inducible transcript 3 [Source:HGNC Symbol;Acc:HGNC:2726]	protein_coding	4.32312	5.89021	5.70412	6.78394	6.92781	7.07693	8.07747	8.15801	7.5678	0.00416043	0.0259448
ENSG00000173207	CKS1B	ENST00000368439;ENST00000471245;ENST00000308987;ENST00000368436;ENST00000477676;ENST00000473344;ENST00000474215	CDC28 protein kinase regulatory subunit 1B [Source:HGNC Symbol;Acc:HGNC:19083]	protein_coding;processed_transcript	39.0355	40.3246	36.9605	35.6171	33.7009	35.2376	32.3507	32.3966	33.3061	0.00419063	0.0261117
ENSG00000160932	LY6E	ENST00000517503;ENST00000519615;ENST00000522024;ENST00000520531;ENST00000292494;ENST00000521699;ENST00000520466;ENST00000522528;ENST00000429120;ENST00000521003;ENST00000519546;ENST00000522971;ENST00000521182;ENST00000519611;ENST00000523847	lymphocyte antigen 6 family member E [Source:HGNC Symbol;Acc:HGNC:6727]	protein_coding;processed_transcript	324.393	324.38	334.932	314.445	298.614	299.252	304.652	298.652	291.151	0.00421839	0.0262633
ENSG00000109572	CLCN3	ENST00000347613;ENST00000507875;ENST00000613795;ENST00000513761;ENST00000515420;ENST00000512813;ENST00000502998;ENST00000360642	chloride voltage-gated channel 3 [Source:HGNC Symbol;Acc:HGNC:2021]	protein_coding;processed_transcript	7.26345	7.44633	7.60281	7.66408	8.15916	7.83068	8.43928	9.15134	8.35208	0.00424241	0.026402
ENSG00000183696	UPP1	ENST00000436673;ENST00000457596;ENST00000482015;ENST00000395564;ENST00000331803;ENST00000421046;ENST00000444999;ENST00000495446;ENST00000395560	uridine phosphorylase 1 [Source:HGNC Symbol;Acc:HGNC:12576]	protein_coding;nonsense_mediated_decay;processed_transcript;retained_intron	0.0673755	0.0973307	0.03398	0.157115	0.188903	0.101857	0.238303	0.185796	0.225491	0.00426667	0.0264989
ENSG00000130433	CACNG6	ENST00000252729;ENST00000346968	calcium voltage-gated channel auxiliary subunit gamma 6 [Source:HGNC Symbol;Acc:HGNC:13625]	protein_coding	0.683897	0.612906	0.919805	1.2186	0.877821	0.85074	1.64026	1.16199	1.34042	0.00426428	0.0264989
ENSG00000150712	MTMR12	ENST00000264934;ENST00000382142;ENST00000280285;ENST00000510216;ENST00000505419;ENST00000504049;ENST00000513622	myotubularin related protein 12 [Source:HGNC Symbol;Acc:HGNC:18191]	protein_coding;processed_transcript;nonsense_mediated_decay;retained_intron	11.8295	11.1268	9.75324	10.073	9.86272	9.67618	9.25074	9.04356	8.36118	0.00427363	0.0265314
ENSG00000063241	ISOC2	ENST00000425675;ENST00000591718;ENST00000438389;ENST00000085068;ENST00000590921;ENST00000587226;ENST00000589080;ENST00000589108	isochorismatase domain containing 2 [Source:HGNC Symbol;Acc:HGNC:26278]	protein_coding;retained_intron	15.7794	17.9038	16.6656	16.489	15.6317	15.6638	14.2486	14.0325	14.01	0.00428081	0.0265651
ENSG00000267892	ENSG00000267892	ENST00000602255	novel transcript, antisense to CAPN12	lncRNA	0.268143	0.167026	0.112802	0.402405	0.308443	0.433414	0.498326	0.62142	0.585584	0.00432241	0.0267905
ENSG00000176619	LMNB2	ENST00000325327;ENST00000527409;ENST00000532465;ENST00000490554	lamin B2 [Source:HGNC Symbol;Acc:HGNC:6638]	protein_coding;processed_transcript;retained_intron	26.6694	27.1883	27.4817	26.8221	24.5613	24.039	23.6138	23.2636	23.0927	0.00433451	0.026811
ENSG00000116221	MRPL37	ENST00000360840;ENST00000398219;ENST00000490670;ENST00000605337	mitochondrial ribosomal protein L37 [Source:HGNC Symbol;Acc:HGNC:14034]	protein_coding;processed_transcript	34.7096	32.1224	32.8539	31.0916	31.4269	31.5009	27.7882	28.9245	27.55	0.00435758	0.02691
ENSG00000006740	ARHGAP44	ENST00000580768;ENST00000340825;ENST00000538915;ENST00000578087;ENST00000584974;ENST00000581437;ENST00000544416;ENST00000379672	Rho GTPase activating protein 44 [Source:HGNC Symbol;Acc:HGNC:29096]	nonsense_mediated_decay;protein_coding;retained_intron;processed_transcript	2.40676	2.35504	2.157	2.84313	2.77266	2.78757	2.53139	2.52877	2.6659	0.00438431	0.0270203
ENSG00000198176	TFDP1	ENST00000544902;ENST00000375370;ENST00000408980;ENST00000475254;ENST00000465174;ENST00000494812;ENST00000464794;ENST00000453989	transcription factor Dp-1 [Source:HGNC Symbol;Acc:HGNC:11749]	nonsense_mediated_decay;protein_coding;processed_transcript	29.4504	27.1755	27.0688	25.9868	25.5357	27.4096	22.738	24.5631	23.4102	0.00438078	0.0270203
ENSG00000123992	DNPEP	ENST00000322176;ENST00000520694;ENST00000373966;ENST00000373963;ENST00000457935;ENST00000429013;ENST00000273075;ENST00000430206;ENST00000460963;ENST00000519698;ENST00000488051;ENST00000488881;ENST00000523282;ENST00000522421;ENST00000462779;ENST00000519905;ENST00000523527;ENST00000434339;ENST00000373972;ENST00000521459;ENST00000490371	aspartyl aminopeptidase [Source:HGNC Symbol;Acc:HGNC:2981]	protein_coding;nonsense_mediated_decay;retained_intron;processed_transcript	29.1059	31.1083	32.1332	29.4303	27.7343	28.2885	25.7197	25.437	26.8542	0.00439717	0.0270667
ENSG00000117228	GBP1	ENST00000495131;ENST00000459831;ENST00000370473;ENST00000681280;ENST00000493139;ENST00000469194;ENST00000479889;ENST00000468959;ENST00000484970	guanylate binding protein 1 [Source:HGNC Symbol;Acc:HGNC:4182]	retained_intron;protein_coding	2.49853	2.5211	2.56747	3.13095	3.47207	2.94265	3.06426	3.09901	3.28967	0.00440403	0.027098
ENSG00000139266	MARCHF9	ENST00000266643;ENST00000548358;ENST00000552279	membrane associated ring-CH-type finger 9 [Source:HGNC Symbol;Acc:HGNC:25139]	protein_coding;retained_intron	6.06197	6.64241	6.40317	7.47049	6.84934	6.43848	7.90908	7.48291	7.51846	0.00441399	0.0271484
ENSG00000083844	ZNF264	ENST00000263095;ENST00000600531;ENST00000597447;ENST00000599653	zinc finger protein 264 [Source:HGNC Symbol;Acc:HGNC:13057]	protein_coding	0.456884	0.440492	0.413711	0.515197	0.525938	0.597795	0.724768	0.579433	0.692227	0.00445196	0.0273488
ENSG00000174007	CEP19	ENST00000409690	centrosomal protein 19 [Source:HGNC Symbol;Acc:HGNC:28209]	protein_coding	0.278524	0.42132	0.526462	0.760707	0.740655	0.854867	1.04747	0.787937	0.720609	0.00445672	0.0273647
ENSG00000106144	CASP2	ENST00000619992;ENST00000493642;ENST00000310447;ENST00000472067;ENST00000350623;ENST00000481483;ENST00000392925	caspase 2 [Source:HGNC Symbol;Acc:HGNC:1503]	protein_coding;processed_transcript;retained_intron;nonsense_mediated_decay	8.86458	9.32656	9.12796	8.59911	8.17633	8.68772	7.79795	7.49636	7.79685	0.00451427	0.0276647
ENSG00000138798	EGF	ENST00000265171;ENST00000502579;ENST00000503392;ENST00000537316;ENST00000504633;ENST00000511228;ENST00000502723;ENST00000544918;ENST00000652245	epidermal growth factor [Source:HGNC Symbol;Acc:HGNC:3229]	protein_coding;retained_intron;processed_transcript	0.241848	0.190414	0.239823	0.216115	0.419709	0.31448	0.393231	0.468705	0.411871	0.00455915	0.0278724
ENSG00000152409	JMY	ENST00000396137	junction mediating and regulatory protein, p53 cofactor [Source:HGNC Symbol;Acc:HGNC:28916]	protein_coding	4.58264	4.58272	4.43184	4.7214	5.04769	4.84667	5.28621	5.26154	5.09526	0.00456948	0.0279244
ENSG00000100883	SRP54	ENST00000677621;ENST00000678836;ENST00000216774;ENST00000546080;ENST00000678627;ENST00000678519;ENST00000678963;ENST00000555557;ENST00000555746;ENST00000678477;ENST00000553544;ENST00000555535;ENST00000677561;ENST00000555317;ENST00000556992;ENST00000553923;ENST00000679045;ENST00000556445;ENST00000677647;ENST00000554803	signal recognition particle 54 [Source:HGNC Symbol;Acc:HGNC:11301]	retained_intron;nonsense_mediated_decay;protein_coding;processed_transcript	14.2897	14.7354	13.9478	14.9643	15.8129	14.7951	15.8741	16.2231	15.5836	0.0045852	0.027998
ENSG00000116984	MTR	ENST00000680454;ENST00000679569;ENST00000674797;ENST00000366577;ENST00000470570;ENST00000681177;ENST00000681102;ENST00000535889;ENST00000679842;ENST00000681937;ENST00000652435;ENST00000650888	5-methyltetrahydrofolate-homocysteine methyltransferase [Source:HGNC Symbol;Acc:HGNC:7468]	retained_intron;protein_coding;nonsense_mediated_decay	2.0889	2.19279	2.1771	2.09893	2.03577	2.04303	1.86849	1.75354	1.82152	0.00462558	0.0281769
ENSG00000001084	GCLC	ENST00000513939;ENST00000509541;ENST00000650454;ENST00000504525;ENST00000616923;ENST00000514004;ENST00000505294;ENST00000515580;ENST00000514373;ENST00000643939;ENST00000504353;ENST00000514933;ENST00000510837	glutamate-cysteine ligase catalytic subunit [Source:HGNC Symbol;Acc:HGNC:4311]	protein_coding;nonsense_mediated_decay;retained_intron;processed_transcript	8.4449	8.57023	8.45019	9.46486	9.18032	9.1627	9.50021	9.76234	9.78072	0.00464893	0.0283078
ENSG00000140993	TIGD7	ENST00000396862;ENST00000573695;ENST00000573608;ENST00000570634;ENST00000574598;ENST00000571748;ENST00000572297	tigger transposable element derived 7 [Source:HGNC Symbol;Acc:HGNC:18331]	protein_coding;processed_transcript	3.15712	3.36176	2.87103	3.10676	3.89245	3.78656	4.25011	4.31228	4.02369	0.00468279	0.0284987
ENSG00000184992	BRI3BP	ENST00000341446;ENST00000671775;ENST00000672415	BRI3 binding protein [Source:HGNC Symbol;Acc:HGNC:14251]	protein_coding	14.0452	14.3946	13.811	13.2194	13.6918	13.5025	11.8326	12.2544	12.0782	0.0047336	0.0287315
ENSG00000135605	TEC	ENST00000381501;ENST00000511471;ENST00000511150	tec protein tyrosine kinase [Source:HGNC Symbol;Acc:HGNC:11719]	protein_coding;processed_transcript;retained_intron	0.638411	0.656712	0.651551	1.09323	1.12467	0.815949	1.23001	0.833196	1.21487	0.00476862	0.028921
ENSG00000186417	GLDN	ENST00000335449;ENST00000558426;ENST00000559317;ENST00000560215;ENST00000464150	gliomedin [Source:HGNC Symbol;Acc:HGNC:29514]	protein_coding;retained_intron	0.249158	0.314172	0.340238	0.494167	0.443889	0.492521	0.531438	0.454036	0.502859	0.00479329	0.029036
ENSG00000196757	ZNF700	ENST00000254321;ENST00000482090;ENST00000622593	zinc finger protein 700 [Source:HGNC Symbol;Acc:HGNC:25292]	protein_coding	3.26603	3.40043	3.34992	2.76816	2.84596	2.79725	2.13093	2.03059	2.47332	0.004797	0.0290469
ENSG00000122035	RASL11A	ENST00000241463;ENST00000480803	RAS like family 11 member A [Source:HGNC Symbol;Acc:HGNC:23802]	protein_coding;processed_transcript	0.410025	0.299219	0.25953	0.513858	0.611881	0.523949	0.658514	0.847525	0.581582	0.00486642	0.0294088
ENSG00000181449	SOX2	ENST00000325404	SRY-box transcription factor 2 [Source:HGNC Symbol;Acc:HGNC:11195]	protein_coding	17.0827	16.133	20.5814	23.1114	20.7093	21.2418	20.1917	23.2414	20.8117	0.00497489	0.0299338
ENSG00000260077	ENSG00000260077	ENST00000567540	novel transcript	lncRNA	0.343727	0.361725	0.361989	0.649509	0.383391	0.539519	0.803245	0.804008	0.998887	0.00497875	0.0299452
ENSG00000198729	PPP1R14C	ENST00000361131	protein phosphatase 1 regulatory inhibitor subunit 14C [Source:HGNC Symbol;Acc:HGNC:14952]	protein_coding	0.559171	0.662353	0.68119	1.04173	0.864036	0.693119	1.12988	1.44674	1.01886	0.0049896	0.0299749
ENSG00000110492	MDK	ENST00000405308;ENST00000407067;ENST00000489525;ENST00000441869;ENST00000490240;ENST00000395566;ENST00000359803;ENST00000481047	midkine [Source:HGNC Symbol;Acc:HGNC:6972]	protein_coding;nonsense_mediated_decay;retained_intron	1.15128	1.22298	1.62068	2.09164	1.47199	1.49233	2.39834	2.24271	2.22131	0.0049962	0.0300028
ENSG00000163683	SMIM14	ENST00000505729;ENST00000295958;ENST00000511809;ENST00000507613;ENST00000512441;ENST00000630374	small integral membrane protein 14 [Source:HGNC Symbol;Acc:HGNC:27321]	protein_coding;nonsense_mediated_decay;processed_transcript	21.4777	20.8913	20.6058	21.7782	22.9918	23.4565	22.9877	24.3449	23.755	0.00517559	0.0308057
ENSG00000103876	FAH	ENST00000561421;ENST00000539156;ENST00000558767;ENST00000407106;ENST00000261755;ENST00000537726;ENST00000683593;ENST00000558514;ENST00000682012;ENST00000559217;ENST00000559542;ENST00000646551;ENST00000561353;ENST00000561369;ENST00000684363;ENST00000684569;ENST00000558627	fumarylacetoacetate hydrolase [Source:HGNC Symbol;Acc:HGNC:3579]	protein_coding;retained_intron;nonsense_mediated_decay;processed_transcript	1.99623	2.06357	2.27219	1.8485	1.81183	1.92325	1.52939	1.56645	1.70015	0.00525464	0.0311618
ENSG00000066279	ASPM	ENST00000680710;ENST00000367409;ENST00000294732;ENST00000367408;ENST00000680112;ENST00000679766;ENST00000680265	assembly factor for spindle microtubules [Source:HGNC Symbol;Acc:HGNC:19048]	protein_coding;retained_intron	3.69278	3.86191	3.72409	3.56405	3.50407	3.61483	3.20835	3.23154	3.07115	0.0052626	0.031197
ENSG00000171608	PIK3CD	ENST00000698710;ENST00000361110;ENST00000377346;ENST00000481137;ENST00000698717;ENST00000698787;ENST00000698711;ENST00000698709;ENST00000484851;ENST00000479223;ENST00000698786;ENST00000698788;ENST00000698719;ENST00000698708;ENST00000698712;ENST00000698718;ENST00000698789;ENST00000698715;ENST00000698713	phosphatidylinositol-4,5-bisphosphate 3-kinase catalytic subunit delta [Source:HGNC Symbol;Acc:HGNC:8977]	protein_coding;nonsense_mediated_decay;retained_intron;processed_transcript	0.675838	0.604541	0.741513	1.04019	0.910863	0.853904	0.992842	0.951908	0.950828	0.00527914	0.0312464
ENSG00000103121	CMC2	ENST00000562713;ENST00000486645;ENST00000219400;ENST00000570195;ENST00000563779;ENST00000567593;ENST00000565925;ENST00000565514;ENST00000570086;ENST00000569187;ENST00000565650;ENST00000630396;ENST00000569666;ENST00000562828;ENST00000566231;ENST00000568228;ENST00000565108;ENST00000564249;ENST00000566047;ENST00000561614;ENST00000565914;ENST00000565613;ENST00000564174	C-X9-C motif containing 2 [Source:HGNC Symbol;Acc:HGNC:24447]	protein_coding;retained_intron;nonsense_mediated_decay;processed_transcript	1.876	2.27606	2.39022	1.77149	2.03134	1.85183	1.78315	1.63502	1.57135	0.00530078	0.0313379
ENSG00000117620	SLC35A3	ENST00000638338;ENST00000639807;ENST00000640732;ENST00000640178;ENST00000533028;ENST00000638929;ENST00000640715;ENST00000427993;ENST00000640600;ENST00000638371;ENST00000370153;ENST00000640360;ENST00000370155;ENST00000638336;ENST00000532693;ENST00000422078;ENST00000638876;ENST00000640726;ENST00000639994;ENST00000639221;ENST00000639088;ENST00000465289;ENST00000639148;ENST00000638988	solute carrier family 35 member A3 [Source:HGNC Symbol;Acc:HGNC:11023]	protein_coding;nonsense_mediated_decay;retained_intron;processed_transcript	2.64941	2.56122	2.22173	2.777	3.18175	2.90686	2.79824	2.97674	2.69436	0.00545931	0.032138
ENSG00000108433	GOSR2	ENST00000638216;ENST00000640051;ENST00000640269;ENST00000638838;ENST00000640621;ENST00000638374;ENST00000415811;ENST00000640709;ENST00000575949;ENST00000640608;ENST00000576910;ENST00000640007;ENST00000225567;ENST00000638189;ENST00000623037;ENST00000639713;ENST00000638634;ENST00000640723;ENST00000640792;ENST00000572403;ENST00000639199;ENST00000640495;ENST00000571658;ENST00000638219;ENST00000638579…	golgi SNAP receptor complex member 2 [Source:HGNC Symbol;Acc:HGNC:4431]	protein_coding;retained_intron;nonsense_mediated_decay;processed_transcript	3.23392	3.61563	3.06201	2.81963	2.95677	3.10126	2.80447	2.52658	2.7656	0.00546533	0.0321607
ENSG00000099956	SMARCB1	ENST00000644462;ENST00000644619;ENST00000644036;ENST00000417137;ENST00000344921;ENST00000407422;ENST00000646911;ENST00000646723;ENST00000635578;ENST00000646421;ENST00000491967;ENST00000645799;ENST00000643421;ENST00000477836;ENST00000634926;ENST00000263121;ENST00000642727;ENST00000644467;ENST00000407082	SWI/SNF related, matrix associated, actin dependent regulator of chromatin, subfamily b, member 1 [Source:HGNC Symbol;Acc:HGNC:11103]	nonsense_mediated_decay;protein_coding;retained_intron	8.11774	7.90737	8.16094	7.70773	7.27248	7.69923	7.09601	6.58235	7.09074	0.00548513	0.0322402
ENSG00000258289	CHURC1	ENST00000552002;ENST00000607599;ENST00000551093;ENST00000549115;ENST00000551947;ENST00000556089;ENST00000547625;ENST00000548752	churchill domain containing 1 [Source:HGNC Symbol;Acc:HGNC:20099]	protein_coding;retained_intron	15.5403	14.3568	14.6667	16.6233	17.4887	16.3317	16.2474	16.7929	16.5066	0.0054955	0.0322887
ENSG00000153237	CCDC148	ENST00000283233;ENST00000409889;ENST00000454257;ENST00000491563;ENST00000448656;ENST00000451554;ENST00000417066	coiled-coil domain containing 148 [Source:HGNC Symbol;Acc:HGNC:25191]	protein_coding;nonsense_mediated_decay;processed_transcript	0.240333	0.241963	0.123505	0.284069	0.539577	0.348033	0.391735	0.487593	0.512679	0.00551453	0.0323755
ENSG00000204934	ATP6V0E2-AS1	ENST00000461019;ENST00000488315	ATP6V0E2 antisense RNA 1 [Source:HGNC Symbol;Acc:HGNC:44180]	lncRNA	0.480787	0.393628	0.548522	0.688053	0.914141	0.895178	0.90343	0.652092	0.857138	0.00556409	0.0325662
ENSG00000104889	RNASEH2A	ENST00000221486;ENST00000593017;ENST00000643757;ENST00000590279;ENST00000590121	ribonuclease H2 subunit A [Source:HGNC Symbol;Acc:HGNC:18518]	protein_coding;retained_intron	25.2497	24.9094	26.6223	24.6203	21.4801	22.8925	19.8348	20.3578	22.3124	0.00564913	0.0329374
ENSG00000102144	PGK1	ENST00000373316;ENST00000474281;ENST00000476531;ENST00000477335	phosphoglycerate kinase 1 [Source:HGNC Symbol;Acc:HGNC:8896]	protein_coding;processed_transcript	85.8022	91.2206	91.1203	80.7475	78.5379	78.1073	80.6311	82.9811	78.2338	0.00574911	0.0334053
ENSG00000146540	C7orf50	ENST00000397100;ENST00000412051;ENST00000491163;ENST00000397098;ENST00000357429;ENST00000465681;ENST00000488073	chromosome 7 open reading frame 50 [Source:HGNC Symbol;Acc:HGNC:22421]	protein_coding;retained_intron;processed_transcript	26.4498	28.5268	28.857	27.7728	26.2725	25.9141	24.4292	23.5245	24.7972	0.00576265	0.033433
ENSG00000177697	CD151	ENST00000532045;ENST00000397421;ENST00000397420;ENST00000645878;ENST00000322008;ENST00000526439;ENST00000526693;ENST00000530155;ENST00000525181;ENST00000525718;ENST00000524748;ENST00000531999;ENST00000528011;ENST00000525333;ENST00000528867;ENST00000527341;ENST00000532075;ENST00000529810;ENST00000526661;ENST00000642413;ENST00000525868;ENST00000530320	CD151 molecule (Raph blood group) [Source:HGNC Symbol;Acc:HGNC:1630]	retained_intron;protein_coding;processed_transcript	23.4758	25.4538	23.1524	22.4491	19.7846	20.9238	19.7202	20.5967	20.5935	0.0058553	0.0338674
ENSG00000135604	STX11	ENST00000367568;ENST00000698356;ENST00000698355	syntaxin 11 [Source:HGNC Symbol;Acc:HGNC:11429]	protein_coding	0.242753	0.260084	0.237178	0.309206	0.284351	0.471041	0.496849	0.563152	0.359551	0.00589025	0.0340308
ENSG00000224769	MUC20P1	ENST00000457750	mucin 20, cell surface associated pseudogene 1 [Source:HGNC Symbol;Acc:HGNC:51921]	unprocessed_pseudogene	2.30839	2.16763	2.06077	2.8773	2.7803	3.49616	3.95775	2.98139	3.36368	0.0059743	0.0344903
ENSG00000143079	CTTNBP2NL	ENST00000271277;ENST00000607039;ENST00000441739	CTTNBP2 N-terminal like [Source:HGNC Symbol;Acc:HGNC:25330]	protein_coding;processed_transcript	5.34232	4.82608	4.92163	5.66006	6.09314	5.41688	5.76592	5.79384	5.80482	0.00598562	0.0345425
ENSG00000285467	ENSG00000285467	ENST00000558293	novel transcript	lncRNA	0.249864	0	0	0.454953	0.819551	0.651354	0.709293	0.43909	0.382065	0.0060998	0.0350554
ENSG00000113108	APBB3	ENST00000412920;ENST00000515056;ENST00000510241;ENST00000503979;ENST00000354402;ENST00000506958;ENST00000358580;ENST00000511201;ENST00000511463;ENST00000511896;ENST00000509914;ENST00000511459;ENST00000503850;ENST00000506165;ENST00000513507;ENST00000357560	amyloid beta precursor protein binding family B member 3 [Source:HGNC Symbol;Acc:HGNC:20708]	protein_coding;retained_intron;nonsense_mediated_decay	1.1986	1.58239	1.24658	1.82845	1.63071	1.34574	2.26129	1.99813	2.03891	0.00631909	0.0361656
ENSG00000135451	TROAP	ENST00000547923;ENST00000551192;ENST00000257909;ENST00000551245;ENST00000380327;ENST00000547807;ENST00000549534;ENST00000548311;ENST00000551567;ENST00000546776;ENST00000550346;ENST00000548817;ENST00000550709;ENST00000546735;ENST00000549275	trophinin associated protein [Source:HGNC Symbol;Acc:HGNC:12327]	protein_coding;nonsense_mediated_decay;retained_intron	9.44444	9.85195	8.62796	8.03725	7.53666	7.65101	8.15297	7.50361	8.42903	0.00635722	0.0362886
ENSG00000114942	EEF1B2	ENST00000429769;ENST00000236957;ENST00000445505;ENST00000392222;ENST00000392221;ENST00000460760;ENST00000479587;ENST00000482103;ENST00000455150;ENST00000415904	eukaryotic translation elongation factor 1 beta 2 [Source:HGNC Symbol;Acc:HGNC:3208]	nonsense_mediated_decay;protein_coding;retained_intron	78.0211	87.927	83.297	77.2583	79.413	76.402	68.0297	72.8623	70.5754	0.00636159	0.0362999
ENSG00000130751	NPAS1	ENST00000602212;ENST00000439365;ENST00000602189;ENST00000594670;ENST00000601169;ENST00000449844;ENST00000594257;ENST00000600352	neuronal PAS domain protein 1 [Source:HGNC Symbol;Acc:HGNC:7894]	protein_coding;retained_intron;nonsense_mediated_decay	1.5222	1.66936	1.97023	1.0948	1.05594	1.05508	1.2738	1.05712	1.14704	0.00638503	0.0363928
ENSG00000103429	BFAR	ENST00000563971;ENST00000261658;ENST00000566520;ENST00000562442;ENST00000566710;ENST00000562121;ENST00000570219;ENST00000562545;ENST00000563313;ENST00000563082;ENST00000564078	bifunctional apoptosis regulator [Source:HGNC Symbol;Acc:HGNC:17613]	protein_coding;retained_intron;nonsense_mediated_decay;processed_transcript	19.7658	17.6262	20.1131	19.5191	20.8942	20.3433	21.9607	22.1892	22.0187	0.00639766	0.0364511
ENSG00000132591	ERAL1	ENST00000471992;ENST00000254928;ENST00000580917;ENST00000412138;ENST00000583487;ENST00000577942;ENST00000578001	Era like 12S mitochondrial rRNA chaperone 1 [Source:HGNC Symbol;Acc:HGNC:3424]	retained_intron;protein_coding;nonsense_mediated_decay;processed_transcript	22.0373	23.2011	21.771	20.3168	21.299	21.885	18.0058	19.4585	19.1225	0.00640149	0.0364593
ENSG00000168062	BATF2	ENST00000301887;ENST00000435842;ENST00000527454;ENST00000534177	basic leucine zipper ATF-like transcription factor 2 [Source:HGNC Symbol;Acc:HGNC:25163]	protein_coding;retained_intron	9.08185	8.82435	8.79431	10.2851	10.5028	10.1094	10.2033	10.6101	9.67216	0.00651826	0.0369586
ENSG00000169567	HINT1	ENST00000508488;ENST00000513012;ENST00000506908;ENST00000675491;ENST00000511475;ENST00000508495;ENST00000513345;ENST00000675372;ENST00000304043;ENST00000676117;ENST00000504202;ENST00000520028;ENST00000675135;ENST00000675100	histidine triad nucleotide binding protein 1 [Source:HGNC Symbol;Acc:HGNC:4912]	nonsense_mediated_decay;protein_coding;processed_transcript	8.69494	9.59197	9.33033	8.41066	8.14805	8.13603	7.31354	7.51928	8.14746	0.00661379	0.0373752
ENSG00000109618	SEPSECS	ENST00000680824;ENST00000681071;ENST00000382103;ENST00000681948;ENST00000358971;ENST00000681374;ENST00000681640;ENST00000514585;ENST00000680581;ENST00000681166	Sep (O-phosphoserine) tRNA:Sec (selenocysteine) tRNA synthase [Source:HGNC Symbol;Acc:HGNC:30605]	retained_intron;protein_coding;nonsense_mediated_decay	1.25567	1.25294	1.13149	1.32621	1.46581	1.5686	1.53345	1.70243	1.60713	0.00661173	0.0373752
ENSG00000197785	ATAD3A	ENST00000672388;ENST00000536055;ENST00000378756;ENST00000378755;ENST00000339113;ENST00000429957;ENST00000400830;ENST00000439513	ATPase family AAA domain containing 3A [Source:HGNC Symbol;Acc:HGNC:25567]	retained_intron;protein_coding;nonsense_mediated_decay	11.6212	11.2774	12.5014	11.2622	10.4581	11.0495	9.88149	9.96828	9.7332	0.00667289	0.0375906
ENSG00000167037	SGSM1	ENST00000610372;ENST00000400358;ENST00000400359;ENST00000473458	small G protein signaling modulator 1 [Source:HGNC Symbol;Acc:HGNC:29410]	protein_coding;retained_intron	0.10348	0.162666	0.191623	0.186843	0.245058	0.226226	0.216821	0.32008	0.373828	0.00667657	0.0375906
ENSG00000181991	MRPS11	ENST00000353598;ENST00000559323;ENST00000325844;ENST00000558406;ENST00000560708;ENST00000559557;ENST00000561262;ENST00000560850;ENST00000557974;ENST00000559125;ENST00000558548	mitochondrial ribosomal protein S11 [Source:HGNC Symbol;Acc:HGNC:14050]	protein_coding;retained_intron;nonsense_mediated_decay;processed_transcript	7.37246	7.60114	8.3419	7.14306	7.28084	7.24537	6.41217	6.70706	6.28349	0.00669806	0.0376976
ENSG00000205571	SMN2	ENST00000626847;ENST00000380743;ENST00000505346;ENST00000506734;ENST00000380742;ENST00000638794;ENST00000507458;ENST00000614240;ENST00000628696;ENST00000514914;ENST00000509805;ENST00000503678;ENST00000511873;ENST00000511812;ENST00000508258;ENST00000380741	survival of motor neuron 2, centromeric [Source:HGNC Symbol;Acc:HGNC:11118]	protein_coding;retained_intron;nonsense_mediated_decay	20.2863	13.0821	12.9048	20.0761	19.1864	19.2265	20.126	19.1989	18.7871	0.00671283	0.0377668
ENSG00000164070	HSPA4L	ENST00000296464;ENST00000515262;ENST00000508549;ENST00000505726;ENST00000508776	heat shock protein family A (Hsp70) member 4 like [Source:HGNC Symbol;Acc:HGNC:17041]	protein_coding;processed_transcript	3.19534	3.27971	3.08208	3.44992	3.67154	3.43241	3.6451	3.69196	3.51299	0.0067609	0.0380091
ENSG00000136156	ITM2B	ENST00000650479;ENST00000648898;ENST00000378549;ENST00000647800;ENST00000648586;ENST00000648312;ENST00000649452	integral membrane protein 2B [Source:HGNC Symbol;Acc:HGNC:6174]	nonsense_mediated_decay;processed_transcript;protein_coding	21.8016	19.7334	20.1023	21.3964	23.2076	22.8545	23.0475	24.3868	22.4666	0.00677358	0.0380664
ENSG00000134899	ERCC5	ENST00000682632;ENST00000683246;ENST00000651281;ENST00000651055;ENST00000651002;ENST00000375954;ENST00000652613;ENST00000682869;ENST00000683642;ENST00000472247;ENST00000375958;ENST00000481099;ENST00000684184;ENST00000535557;ENST00000652225	ERCC excision repair 5, endonuclease [Source:HGNC Symbol;Acc:HGNC:3437]	retained_intron;processed_transcript;nonsense_mediated_decay;protein_coding	2.04049	1.9815	2.2157	2.36743	2.27037	2.28122	2.7706	2.52161	2.30338	0.00679758	0.0381872
ENSG00000127328	RAB3IP	ENST00000378815;ENST00000551641;ENST00000247833;ENST00000483530;ENST00000547055;ENST00000526994;ENST00000547591;ENST00000378809;ENST00000550647;ENST00000417413;ENST00000553099;ENST00000550536;ENST00000362025;ENST00000549760;ENST00000552610;ENST00000481897	RAB3A interacting protein [Source:HGNC Symbol;Acc:HGNC:16508]	protein_coding;nonsense_mediated_decay;retained_intron	3.42323	3.47625	3.09224	3.64868	4.05887	3.92849	3.58908	3.6513	3.45109	0.00682154	0.0382795
ENSG00000109321	AREG	ENST00000395748;ENST00000511560	amphiregulin [Source:HGNC Symbol;Acc:HGNC:651]	protein_coding;retained_intron	62.3911	66.6096	60.4255	56.8196	56.7116	56.6695	54.2766	53.7311	54.2249	0.00685914	0.0384763
ENSG00000075089	ACTR6	ENST00000552376;ENST00000546902;ENST00000548180;ENST00000188312;ENST00000551517;ENST00000547458;ENST00000551652;ENST00000551617;ENST00000549977;ENST00000551440;ENST00000552064;ENST00000553038	actin related protein 6 [Source:HGNC Symbol;Acc:HGNC:24025]	protein_coding;nonsense_mediated_decay;retained_intron	5.49478	5.4252	5.68198	6.92397	7.74641	6.07035	5.82819	6.32059	6.41028	0.0068617	0.0384765
ENSG00000136943	CTSV	ENST00000680435;ENST00000680385;ENST00000681737;ENST00000259470;ENST00000680159;ENST00000679917;ENST00000680221;ENST00000681330;ENST00000681927;ENST00000681517	cathepsin V [Source:HGNC Symbol;Acc:HGNC:2538]	retained_intron;nonsense_mediated_decay;protein_coding	2.37975	2.52314	2.61269	2.55879	2.83681	2.85199	3.09962	3.18279	3.1321	0.00711141	0.039571
ENSG00000136068	FLNB	ENST00000490882;ENST00000358537;ENST00000429972;ENST00000295956;ENST00000419752;ENST00000477629;ENST00000684439;ENST00000491408;ENST00000682503;ENST00000682297;ENST00000684517;ENST00000682097;ENST00000683925;ENST00000468939;ENST00000684607;ENST00000684506;ENST00000466455;ENST00000682987;ENST00000683511;ENST00000683114;ENST00000484981;ENST00000684107;ENST00000470231;ENST00000475487;ENST00000481470…	filamin B [Source:HGNC Symbol;Acc:HGNC:3755]	protein_coding;retained_intron;processed_transcript;nonsense_mediated_decay	18.8005	16.8489	17.3106	16.9682	14.9354	16.2993	15.9534	15.0721	14.9794	0.00713957	0.0396842
ENSG00000172478	MAB21L4	ENST00000388934;ENST00000414499;ENST00000307486	mab-21 like 4 [Source:HGNC Symbol;Acc:HGNC:26216]	protein_coding	1.67281	1.68356	1.95195	2.37924	1.76128	2.51557	2.53698	2.84855	2.86089	0.00716645	0.0398191
ENSG00000213920	MDP1	ENST00000288087;ENST00000530222;ENST00000532742;ENST00000528849;ENST00000466422;ENST00000532557;ENST00000531553;ENST00000396833;ENST00000533536;ENST00000525696	magnesium dependent phosphatase 1 [Source:HGNC Symbol;Acc:HGNC:28781]	protein_coding;retained_intron;processed_transcript	4.22061	2.33647	3.51785	4.50502	5.13601	3.94808	4.86645	5.88789	6.4186	0.00725878	0.0402588
ENSG00000249158	PCDHA11	ENST00000616325;ENST00000398640;ENST00000617408	protocadherin alpha 11 [Source:HGNC Symbol;Acc:HGNC:8665]	protein_coding	4.16088	4.49656	4.72205	4.84173	5.97764	4.7777	5.38682	6.2603	5.00431	0.00735903	0.0407851
ENSG00000145431	PDGFC	ENST00000502773;ENST00000513664;ENST00000504672;ENST00000274071	platelet derived growth factor C [Source:HGNC Symbol;Acc:HGNC:8801]	protein_coding;processed_transcript;nonsense_mediated_decay	0.459197	0.560521	0.407757	0.204011	0.225359	0.327851	0.289541	0.364768	0.219648	0.00738775	0.0408848
ENSG00000182704	TSKU	ENST00000612930;ENST00000527881;ENST00000333090;ENST00000533752;ENST00000525167	tsukushi, small leucine rich proteoglycan [Source:HGNC Symbol;Acc:HGNC:28850]	protein_coding	34.6801	31.2147	32.73	30.964	28.4749	30.3526	27.9387	27.5186	29.0713	0.00738249	0.0408848
ENSG00000101464	PIGU	ENST00000217446;ENST00000374820;ENST00000462389;ENST00000480175	phosphatidylinositol glycan anchor biosynthesis class U [Source:HGNC Symbol;Acc:HGNC:15791]	protein_coding;retained_intron;processed_transcript	13.6317	14.2637	12.8568	12.2297	11.964	13.205	11.6278	11.3606	10.9102	0.00745698	0.04123
ENSG00000165891	E2F7	ENST00000322886;ENST00000416496;ENST00000547316;ENST00000551058;ENST00000550669;ENST00000551558	E2F transcription factor 7 [Source:HGNC Symbol;Acc:HGNC:23820]	protein_coding;retained_intron	3.16028	2.74673	2.53827	1.99267	2.27428	2.39912	2.1046	2.24422	1.88335	0.00759097	0.0418497
ENSG00000025039	RRAGD	ENST00000369415	Ras related GTP binding D [Source:HGNC Symbol;Acc:HGNC:19903]	protein_coding	3.66444	3.39053	3.63229	3.97574	4.16609	3.54238	4.27185	4.70659	4.49021	0.0076907	0.0421633
ENSG00000221963	APOL6	ENST00000409652	apolipoprotein L6 [Source:HGNC Symbol;Acc:HGNC:14870]	protein_coding	3.3352	3.17691	2.91124	3.26237	3.63136	3.52617	3.73916	3.48013	3.77314	0.00769915	0.0421944
ENSG00000239521	CASTOR3	ENST00000328453;ENST00000543273;ENST00000414739;ENST00000414997;ENST00000701563;ENST00000445230;ENST00000701477;ENST00000689058;ENST00000700967;ENST00000435519;ENST00000454084;ENST00000647868;ENST00000702747	CASTOR family member 3 [Source:HGNC Symbol;Acc:HGNC:29954]	processed_transcript;transcribed_unprocessed_pseudogene	2.41468	2.33097	2.17431	2.71407	2.75418	3.18865	2.795	2.90197	3.06462	0.00775195	0.0423485
ENSG00000175893	ZDHHC21	ENST00000380916;ENST00000497966	zinc finger DHHC-type palmitoyltransferase 21 [Source:HGNC Symbol;Acc:HGNC:20750]	protein_coding;processed_transcript	2.86785	2.67563	2.70893	2.47483	2.2766	2.5719	2.12055	2.27187	2.21224	0.00775049	0.0423485
ENSG00000185437	SH3BGR	ENST00000333634;ENST00000380631;ENST00000380634;ENST00000447939;ENST00000440288;ENST00000380637;ENST00000452550;ENST00000423596;ENST00000458295	SH3 domain binding glutamate rich protein [Source:HGNC Symbol;Acc:HGNC:10822]	protein_coding	1.52539	1.99865	1.51799	2.2141	2.37802	1.99982	3.40892	2.86292	2.24386	0.00779829	0.0425237
ENSG00000105220	GPI	ENST00000586425;ENST00000587384;ENST00000643067;ENST00000588991;ENST00000415930;ENST00000589985;ENST00000586077;ENST00000356487;ENST00000592277;ENST00000589504;ENST00000590375;ENST00000647446;ENST00000592144;ENST00000646312;ENST00000586392;ENST00000589640;ENST00000591204;ENST00000590362;ENST00000587521;ENST00000589399	glucose-6-phosphate isomerase [Source:HGNC Symbol;Acc:HGNC:4458]	protein_coding;processed_transcript;retained_intron;nonsense_mediated_decay	111.648	107.277	105.079	102.629	98.1632	102.699	104.255	97.4343	99.4779	0.00794683	0.0431483
ENSG00000143376	SNX27	ENST00000458013;ENST00000368843;ENST00000642582;ENST00000642479;ENST00000643179;ENST00000644970;ENST00000642376;ENST00000368841;ENST00000647328;ENST00000482791;ENST00000643937;ENST00000643845;ENST00000642349;ENST00000647551;ENST00000643814;ENST00000647454	sorting nexin 27 [Source:HGNC Symbol;Acc:HGNC:20073]	protein_coding;processed_transcript;nonsense_mediated_decay;retained_intron	4.68306	4.34208	4.40597	4.76091	4.54358	4.83242	5.08637	5.0376	5.13695	0.00800724	0.0433992
ENSG00000088682	COQ9	ENST00000567072;ENST00000262507;ENST00000563391;ENST00000567576;ENST00000564115;ENST00000567933;ENST00000564655;ENST00000565964;ENST00000569980;ENST00000567384;ENST00000562734;ENST00000566388;ENST00000562426;ENST00000568790	coenzyme Q9 [Source:HGNC Symbol;Acc:HGNC:25302]	protein_coding;retained_intron;nonsense_mediated_decay;processed_transcript	5.57444	6.13156	6.02887	5.06731	5.11376	5.44347	4.67483	4.78062	4.7262	0.00802029	0.0434386
ENSG00000161847	RAVER1	ENST00000615032;ENST00000592208;ENST00000611074;ENST00000617231;ENST00000585935;ENST00000593136;ENST00000591969	ribonucleoprotein, PTB binding 1 [Source:HGNC Symbol;Acc:HGNC:30296]	protein_coding;retained_intron;processed_transcript;nonsense_mediated_decay	23.8323	22.03	22.4895	21.1681	20.0415	20.9976	20.2577	19.0426	19.8731	0.00806409	0.0436297
ENSG00000178464	RPL10P16	ENST00000325000	ribosomal protein L10 pseudogene 16 [Source:HGNC Symbol;Acc:HGNC:36882]	processed_pseudogene	83.5929	93.2436	89.2025	79.0177	75.1989	73.8714	74.7372	76.4791	75.4271	0.0080989	0.0437559
ENSG00000084463	WBP11	ENST00000261167;ENST00000544764;ENST00000543316;ENST00000535328	WW domain binding protein 11 [Source:HGNC Symbol;Acc:HGNC:16461]	protein_coding;retained_intron	32.6375	32.0239	30.7975	28.738	28.9	29.521	28.4641	26.868	27.2418	0.00809426	0.0437559
ENSG00000158042	MRPL17	ENST00000532203;ENST00000288937;ENST00000529958	mitochondrial ribosomal protein L17 [Source:HGNC Symbol;Acc:HGNC:14053]	protein_coding;retained_intron	14.8457	16.6722	16.3185	14.6754	15.2931	14.4007	13.1725	13.3497	13.4036	0.00809852	0.0437559
ENSG00000168028	RPSA	ENST00000443003;ENST00000444512;ENST00000697731;ENST00000301821;ENST00000697816;ENST00000458478;ENST00000697732;ENST00000697728;ENST00000495394;ENST00000697735;ENST00000478027;ENST00000697734;ENST00000697754;ENST00000697733;ENST00000697729;ENST00000697753;ENST00000487876;ENST00000697730;ENST00000475346;ENST00000477325	ribosomal protein SA [Source:HGNC Symbol;Acc:HGNC:6502]	protein_coding;nonsense_mediated_decay;retained_intron	66.6497	71.8436	68.905	64.5662	64.6142	62.4055	62.0691	61.6852	60.2427	0.00812101	0.0438163
ENSG00000138433	CIR1	ENST00000342016;ENST00000461454;ENST00000464393;ENST00000377973;ENST00000472169	corepressor interacting with RBPJ, CIR1 [Source:HGNC Symbol;Acc:HGNC:24217]	protein_coding;retained_intron	5.90122	5.70915	5.43772	6.22681	7.17241	6.6832	7.20877	6.78637	7.10887	0.00815867	0.0439452
ENSG00000136490	LIMD2	ENST00000259006;ENST00000583211;ENST00000578061;ENST00000579814;ENST00000578993;ENST00000578067;ENST00000578402;ENST00000578297;ENST00000579329;ENST00000580222;ENST00000582055	LIM domain containing 2 [Source:HGNC Symbol;Acc:HGNC:28142]	protein_coding;retained_intron;nonsense_mediated_decay	0.68873	0.579388	0.815125	0.933312	0.961597	0.785622	1.2383	1.02118	1.08203	0.0081599	0.0439452
ENSG00000173262	SLC2A14	ENST00000543909;ENST00000539738;ENST00000535383;ENST00000539924;ENST00000542546;ENST00000536594;ENST00000340749	solute carrier family 2 member 14 [Source:HGNC Symbol;Acc:HGNC:18301]	protein_coding;retained_intron;nonsense_mediated_decay	0.139041	0.0854012	0.188099	0.208988	0.28718	0.251783	0.294085	0.370326	0.273923	0.00822359	0.0442414
ENSG00000120256	LRP11	ENST00000239367;ENST00000367368;ENST00000463728	LDL receptor related protein 11 [Source:HGNC Symbol;Acc:HGNC:16936]	protein_coding;retained_intron	6.98652	7.38975	7.78845	8.65951	9.08538	8.32403	8.13821	7.91233	7.56695	0.00826093	0.0444109
ENSG00000144045	DQX1	ENST00000404568;ENST00000495597;ENST00000393951;ENST00000418139;ENST00000451518;ENST00000473508;ENST00000483555	DEAQ-box RNA dependent ATPase 1 [Source:HGNC Symbol;Acc:HGNC:20410]	protein_coding;processed_transcript;nonsense_mediated_decay;retained_intron	0.68783	0.916149	0.889764	0.393159	0.388069	0.234736	0.502225	0.203109	0.76688	0.00827978	0.0444681
ENSG00000164032	H2AZ1	ENST00000651623;ENST00000511319;ENST00000296417;ENST00000511348;ENST00000529158;ENST00000511203;ENST00000527366	H2A.Z variant histone 1 [Source:HGNC Symbol;Acc:HGNC:4741]	protein_coding;retained_intron;processed_transcript	131.046	147.543	143.774	130.928	132.263	126.399	114.173	117.788	126.538	0.00841092	0.0449792
ENSG00000164251	F2RL1	ENST00000514165;ENST00000296677	F2R like trypsin receptor 1 [Source:HGNC Symbol;Acc:HGNC:3538]	protein_coding	6.9812	6.43598	6.62019	7.9511	8.33006	8.11122	8.03655	7.65241	7.4364	0.00844734	0.0451265
ENSG00000068366	ACSL4	ENST00000683559;ENST00000504383;ENST00000672401;ENST00000684030;ENST00000348502	acyl-CoA synthetase long chain family member 4 [Source:HGNC Symbol;Acc:HGNC:3571]	retained_intron;protein_coding	0.183273	0.246671	0.0483191	0.0597891	0.0880269	0.0685648	0.06696	0.0445594	0.00577999	0.00850089	0.0453173
ENSG00000086589	RBM22	ENST00000520132;ENST00000199814;ENST00000522469;ENST00000518917;ENST00000521464;ENST00000521248;ENST00000521594	RNA binding motif protein 22 [Source:HGNC Symbol;Acc:HGNC:25503]	retained_intron;protein_coding	21.9295	20.4451	20.6118	18.6301	18.8444	19.9526	18.8027	17.2378	17.2274	0.00851256	0.0453636
ENSG00000135722	FBXL8	ENST00000521920;ENST00000518148;ENST00000258200;ENST00000519378;ENST00000519917;ENST00000523893;ENST00000518603;ENST00000517382	F-box and leucine rich repeat protein 8 [Source:HGNC Symbol;Acc:HGNC:17875]	protein_coding;retained_intron	2.13786	2.05942	1.74963	2.15822	2.3577	2.53677	3.02246	2.82107	2.80129	0.00870726	0.0462073
ENSG00000179029	TMEM107	ENST00000532998;ENST00000437139;ENST00000449985;ENST00000526920;ENST00000417073;ENST00000529756;ENST00000431792;ENST00000316425;ENST00000533070	transmembrane protein 107 [Source:HGNC Symbol;Acc:HGNC:28128]	protein_coding;retained_intron	1.05746	1.15756	1.05928	1.26559	1.2563	1.67058	1.46044	1.7592	1.831	0.00872861	0.0463044
ENSG00000164463	CREBRF	ENST00000296953;ENST00000523161;ENST00000522692;ENST00000520420;ENST00000520464;ENST00000517882	CREB3 regulatory factor [Source:HGNC Symbol;Acc:HGNC:24050]	protein_coding;retained_intron;processed_transcript	0.806643	0.817868	0.675567	0.811812	0.82686	1.10525	1.1429	1.01078	1.15134	0.00876504	0.0464009
ENSG00000150768	DLAT	ENST00000681339;ENST00000527231;ENST00000280346;ENST00000680411;ENST00000679368;ENST00000393051;ENST00000680154;ENST00000681638;ENST00000679829;ENST00000679815;ENST00000680331;ENST00000681316	dihydrolipoamide S-acetyltransferase [Source:HGNC Symbol;Acc:HGNC:2896]	protein_coding;retained_intron;nonsense_mediated_decay	7.06947	7.23854	7.06605	6.74034	7.1103	6.63845	6.23362	5.83287	6.00281	0.00881486	0.0465837
ENSG00000181135	ZNF707	ENST00000532158;ENST00000358656;ENST00000418203;ENST00000532486;ENST00000533031;ENST00000532571;ENST00000527293;ENST00000531811;ENST00000508587;ENST00000526970;ENST00000532205;ENST00000529833;ENST00000527561;ENST00000530574;ENST00000532003;ENST00000525538;ENST00000534589;ENST00000442058;ENST00000528134;ENST00000525185;ENST00000525619;ENST00000525862;ENST00000528456;ENST00000531985;ENST00000531254…	zinc finger protein 707 [Source:HGNC Symbol;Acc:HGNC:27815]	protein_coding;retained_intron;nonsense_mediated_decay;processed_transcript	4.21703	4.13997	4.17651	4.50222	4.39645	4.67599	5.10317	4.74011	4.72631	0.00901439	0.04731
ENSG00000197565	COL4A6	ENST00000394872;ENST00000461897;ENST00000468338;ENST00000487645;ENST00000621266;ENST00000477085;ENST00000372216	collagen type IV alpha 6 chain [Source:HGNC Symbol;Acc:HGNC:2208]	protein_coding;processed_transcript;retained_intron	0.151766	0.184311	0.195783	0.229861	0.206761	0.27859	0.28768	0.343414	0.298337	0.00903185	0.0473853
ENSG00000083290	ULK2	ENST00000395544;ENST00000571454;ENST00000361658;ENST00000575432;ENST00000570983;ENST00000574732;ENST00000571177;ENST00000580130	unc-51 like autophagy activating kinase 2 [Source:HGNC Symbol;Acc:HGNC:13480]	protein_coding;retained_intron;nonsense_mediated_decay;processed_transcript	1.66351	1.63917	1.57756	1.70529	1.75749	1.86109	2.08068	2.09275	1.93191	0.00908151	0.0475968
ENSG00000130779	CLIP1	ENST00000361654;ENST00000537178;ENST00000620786;ENST00000302528;ENST00000358808;ENST00000537123;ENST00000540539;ENST00000543205;ENST00000535290;ENST00000541410;ENST00000514271;ENST00000501271;ENST00000648993;ENST00000536634;ENST00000539080;ENST00000538120	CAP-Gly domain containing linker protein 1 [Source:HGNC Symbol;Acc:HGNC:10461]	protein_coding;processed_transcript;retained_intron;nonsense_mediated_decay	6.31282	5.90544	6.1718	6.46241	6.66595	6.65138	7.18139	6.58134	6.79976	0.00909218	0.0476199
ENSG00000147687	TATDN1	ENST00000519232;ENST00000276692;ENST00000519548;ENST00000520938;ENST00000522310;ENST00000522810;ENST00000519776;ENST00000630259;ENST00000520321;ENST00000605953;ENST00000517678;ENST00000522280;ENST00000518485;ENST00000523631;ENST00000521973;ENST00000522927;ENST00000521546;ENST00000523152;ENST00000523214	TatD DNase domain containing 1 [Source:HGNC Symbol;Acc:HGNC:24220]	protein_coding;nonsense_mediated_decay;retained_intron;processed_transcript	11.5509	12.7273	11.9606	13.1906	13.378	13.0481	13.8226	13.8378	13.6322	0.00921842	0.0481322
ENSG00000173020	GRK2	ENST00000533077;ENST00000308595;ENST00000416281;ENST00000527176;ENST00000532099;ENST00000530291;ENST00000524899;ENST00000534651;ENST00000531390;ENST00000529815;ENST00000526572;ENST00000532611	G protein-coupled receptor kinase 2 [Source:HGNC Symbol;Acc:HGNC:289]	retained_intron;protein_coding;processed_transcript	19.3337	19.1134	19.9283	18.8221	16.9223	18.1864	16.7755	16.2488	17.2011	0.00926043	0.0482689
ENSG00000271503	CCL5	ENST00000603197;ENST00000651122;ENST00000605140	C-C motif chemokine ligand 5 [Source:HGNC Symbol;Acc:HGNC:10632]	protein_coding	21.3583	20.6705	17.4956	22.7928	21.3945	23.2934	22.5489	23.4996	23.3668	0.00928805	0.0483752
ENSG00000165389	SPTSSA	ENST00000298130	serine palmitoyltransferase small subunit A [Source:HGNC Symbol;Acc:HGNC:20361]	protein_coding	69.3126	60.3478	59.2648	69.2628	73.7106	68.6033	68.9152	71.604	72.0861	0.00934692	0.0486365
ENSG00000106211	HSPB1	ENST00000674638;ENST00000674965;ENST00000676398;ENST00000447574;ENST00000674650;ENST00000248553;ENST00000675134;ENST00000429938;ENST00000675488;ENST00000675906;ENST00000675417;ENST00000675733;ENST00000674547	heat shock protein family B (small) member 1 [Source:HGNC Symbol;Acc:HGNC:5246]	protein_coding;nonsense_mediated_decay;processed_transcript;retained_intron	1018.12	1056.03	1013.17	988.787	923.494	957.171	1020.3	927.27	990.89	0.00946675	0.0491259
ENSG00000177731	FLII	ENST00000578101;ENST00000327031;ENST00000545457;ENST00000493401;ENST00000581349;ENST00000580966;ENST00000487369;ENST00000459958;ENST00000581858;ENST00000493600;ENST00000584444;ENST00000577402;ENST00000579294;ENST00000473425;ENST00000578558;ENST00000478416;ENST00000580453;ENST00000582626;ENST00000465046;ENST00000488932;ENST00000461110;ENST00000474265;ENST00000496727;ENST00000577626;ENST00000577398…	FLII actin remodeling protein [Source:HGNC Symbol;Acc:HGNC:3750]	nonsense_mediated_decay;protein_coding;retained_intron;processed_transcript	29.2004	27.2572	29.0329	27.0069	26.4122	27.7388	24.6303	23.741	25.3551	0.00952645	0.0493852
ENSG00000067064	IDI1	ENST00000381344;ENST00000695775;ENST00000429642;ENST00000491735;ENST00000482091;ENST00000427898	isopentenyl-diphosphate delta isomerase 1 [Source:HGNC Symbol;Acc:HGNC:5387]	protein_coding;processed_transcript;retained_intron	14.2534	15.0769	13.0065	12.5522	13.2163	13.1308	10.815	11.9197	12.288	0.00960451	0.0496716
