# Supplementary material for: An InDel Genomic Variant within a Bifunctional Super-Enhancer for LINC00636 and CD47 Regulation in Breast Cancer
Source: Research Square preprint supplement (doi:10.21203/rs.3.rs-9460487/v1), 2026-05-12
Supplement: Supplementary file 2 [file f1dd657862deeff59592e2a0.xlsx]

## Sheet: Role of 26 DEGs in cancer
Table S4. Role of DEGs in breast cancer, related to Figure 6.
Gene	Change upon deleting the insertion	Change upon LINC00636 overexpression	Name	Function	Role in breast cancer
ACSS1	Upregulation	Upregulation	Acyl-CoA Synthetase Short Chain Family Member 1	Fatty acid metabolism
AKR1B10	Upregulation	Upregulation	Aldo-Keto Reductase Family 1 Member B10	Aldehyde metabolism
ANGPTL4	Upregulation	Upregulation	Angiopoietin Like 4	Regulates glucose homeostasis, lipid metabolism, and insulin sensitivity. Apoptosis survival factor for vascular endothelial cells. Role in migration, invasion in cancer	Its upregulation inhibits cell adhesion, migration, and invasion in TNBC (PMID: 32928141). ANGPTL4 overexpression formed larger mammospheres and anchorage-independent colonies in vitro and developed larger primary tumors, more liver metastases, and brain metastatic outgrowth in vivo (PMID: 34447288). Increases metastasis in vivo in 4T1 model (PMID: 32405335). Promotes BC metastasis through TGF-β …
CXCL17	Upregulation	Upregulation	C-X-C Motif Chemokine Ligand 17	Chemoattractant for monocytes, macrophages and dendritic cells. Role in angiogenesis. CRC tumorigenesis and drug-resistance	Recruitment of MDSCs in lung metastasis from BC 4T1 model (PMID: 30755260).
CXCL8	Upregulation	Upregulation	C-X-C Motif Chemokine Ligand 8	IL-8. Chemotactic factor that mediates inflammatory response by attracting neutrophils, basophils, and T-cells. Angiogenesis. SASP.
HES2	Upregulation	Upregulation	Hes Family BHLH Transcription Factor 2	Transcriptional repressor
HMOX1	Upregulation	Upregulation	Heme Oxygenase 1	Heme catabolism
HSPB8	Upregulation	Upregulation	Heat Shock Protein Family B (Small) Member 8	Induced by estrogen in ER+ breast cancer cells
IFIT2	Upregulation	Upregulation	Interferon Induced Protein With Tetratricopeptide Repeats 2	Response to virus
JUN	Upregulation	Upregulation	Jun Proto-Oncogene, AP-1 Transcription Factor Subunit	Breast cancer-associated Transcription factor
KRT17	Upregulation	Upregulation	Keratin 17	KRT17high/CXCL8+ Tumor Cells regulate myeloid infiltration in PDAC. Doxorubicin resistance in TNBC. Cell differentiation. Tumor cell proliferation and invasion	Contributes to doxorubicin resistance in TNBC (PMID: 37634232). Its silencing promotes EMT , and metastasis in TNBC in vivo (PMID: 35639459)
MUC20P1	Upregulation	Upregulation	Mucin 20, Cell Surface Associated Pseudogene 1
PAQR7	Upregulation	Upregulation	Progestin And AdipoQ Receptor Family Member 7	Predicted to be involved in response to steroid hormone
RNF223	Upregulation	Upregulation	Ring Finger Protein 223
SALL4	Upregulation	Upregulation	Spalt Like Transcription Factor 4	Transcription factor with a key role in self-renewal of embryonic and hematopoietic stem cells. Invasion, apoptosis, proliferation, and resistance to therapy	Resistance to doxorubicin in MCF7 (PMID: 26935744). In HER2+ cell lines, SALL4 overexpression increases cell survival and proliferation while reducing the efficacy of trastuzumab, and increases EMT (PMID: 36362083). Invasion/migration and resistance to doxo (PMID: 35317026). Increases migration in MCF7 (PMID: 33680367). SALL4 knockdown inhibited the cell proliferation, induced cell cycle arrest i…
SLC7A5	Upregulation	Upregulation	Solute Carrier Family 7 Member 5	High-affinity transporter that mediates uptake of large neutral amino acids. Promotes tumor cell proliferation. Biomarker of chemo resistance in BC	SLC7A5 overexpression increased proliferation of MCF-7 cells by reducing the cell cycle arrest in G1 phase (PMID: 34164526). Contributes resistance to docetaxel in MCF7 cells (PMID: 33436954)
STAT1	Upregulation	Upregulation	Signal Transducer And Activator Of Transcription 1	Signal transducer and transcription activator that mediates cellular responses to interferons (IFNs)	Increases tumor cell motility and invasion in HER2-BC cells (PMID: 28881584). Both tumor suppressor and oncogenic roles in BC
VGF	Upregulation	Upregulation	VGF Nerve Growth Factor Inducible	Neurogenesis and neuroplasticity
AGR2	Downregulation	Downregulation	Anterior Gradient 2, Protein Disulphide Isomerase Family Member	ER-localized protein, catalyzes protein folding and thiol-disulfide interchange reactions. p53 inhibitor
CRABP2	Downregulation	Downregulation	Cellular Retinoic Acid Binding Protein 2	Regulates the access of retinoic acid to the nuclear retinoic acid receptors
ENSG00000263020	Downregulation	Downregulation
GLA	Downregulation	Downregulation	Galactosidase Alpha	Catalyzes the hydrolysis of glycosphingolipids
KIF4A	Downregulation	Downregulation	Kinesin Family Member 4A	Intracellular transport of membranous organelles. Involved in maintaining chromosome integrity during mitosis. Promotes EMT in glioma. G1 arrest of cervical cancer cells. Increase resistance to chemo in CRC	Role in proliferation, migration and invasion in MDAMB231 (PMID: 35608059). Increases migration/invasion in MCF7/MDA231 (PMID: 32408908). Its overexpression sensitizes BC cells to doxorubicin-mediated apoptosis (PMID: 25377255).
NEK9	Downregulation	Downregulation	NIMA Related Kinase 9	NEK9 inhibition induces mitotic arrest. High expression contributes to resistance in gastric cancer. Promotes migration in GC. Expression is reduced with BC progression	Resistance to PI3K Inhibition (buparlisib) in TNBC (PMID 29472518). Resistance to DNA replication stress (gemcitabine ) in TNBC (PMID 25217585)
PMP22	Downregulation	Downregulation	Peripheral Myelin Protein 22	Major component of myelin in the peripheral nervous system
THBS1	Downregulation	Downregulation	Thrombospondin 1	Mediates cell-to-cell and cell-to-matrix interactions. Play roles in platelet aggregation, angiogenesis, and tumorigenesis. CD47 ligand
