# Supplementary material for: An InDel Genomic Variant within a Bifunctional Super-Enhancer for LINC00636 and CD47 Regulation in Breast Cancer
Source: Research Square preprint supplement (doi:10.21203/rs.3.rs-9460487/v1), 2026-05-12
Supplement: Supplementary file 3 [file fe67665f851b058c30336a7b.xlsx]

## Sheet: DEGs
Table S2. DEGs upon deleting the insertion in MCF7 cells, related to Figure 6.
gene_id	gene_name	transcript_id	GO	KEGG	Description	trans_type	FPKM.MCF7#1_1	FPKM.MCF7#1_2	FPKM.MCF7#2_1	FPKM.MCF7#2_2	FPKM.MCF7_1	FPKM.MCF7_2	pval	qval
ENSG00000157005	SST	ENST00000287641	GO:0005179(hormone activity);GO:0005515(protein binding);GO:0005576(extracellular region);GO:0005615(extracellular space);GO:0006972(hyperosmotic response);GO:0007166(cell surface receptor signaling pathway);GO:0007186(G protein-coupled receptor signaling pathway);GO:0007267(cell-cell signaling);GO:0007268(chemical synaptic transmission);GO:0007584(response to nutrient);GO:0007586(digestion);GO:0…	04024(cAMP signaling pathway);04080(Neuroactive ligand-receptor interaction);04935(Growth hormone synthesis, secretion and action);04971(Gastric acid secretion)	somatostatin [Source:HGNC Symbol;Acc:HGNC:11329]	protein_coding	0.092776	0	0	0	176.796	148.311	9.64654e-142	1.44553e-137
ENSG00000115263	GCG	ENST00000418842;ENST00000497568;ENST00000483769;ENST00000492913;ENST00000375497	GO:0005102(signaling receptor binding);GO:0005179(hormone activity);GO:0005515(protein binding);GO:0005576(extracellular region);GO:0005615(extracellular space);GO:0005737(cytoplasm);GO:0005788(endoplasmic reticulum lumen);GO:0006094(gluconeogenesis);GO:0007186(G protein-coupled receptor signaling pathway);GO:0007188(adenylate cyclase-modulating G protein-coupled receptor signaling pathway);GO:00…	04024(cAMP signaling pathway);04080(Neuroactive ligand-receptor interaction);04714(Thermogenesis);04911(Insulin secretion);04922(Glucagon signaling pathway);04922(Glucagon signaling pathway)	glucagon [Source:HGNC Symbol;Acc:HGNC:4191]	protein_coding;retained_intron	0	0	0	0	32.1591	22.4725	1.59556e-113	1.19547e-109
ENSG00000254647	INS	ENST00000250971;ENST00000381330;ENST00000512523;ENST00000397262;ENST00000421783	GO:0000139(Golgi membrane);GO:0001819(positive regulation of cytokine production);GO:0002020(protease binding);GO:0002674(negative regulation of acute inflammatory response);GO:0005158(insulin receptor binding);GO:0005159(insulin-like growth factor receptor binding);GO:0005179(hormone activity);GO:0005515(protein binding);GO:0005576(extracellular region);GO:0005615(extracellular space);GO:0005788…	04010(MAPK signaling pathway);04014(Ras signaling pathway);04015(Rap1 signaling pathway);04022(cGMP-PKG signaling pathway);04066(HIF-1 signaling pathway);04068(FoxO signaling pathway);04072(Phospholipase D signaling pathway);04114(Oocyte meiosis);04140(Autophagy - animal);04150(mTOR signaling pathway);04151(PI3K-Akt signaling pathway);04152(AMPK signaling pathway);04211(Longevity regulating pathw…	insulin [Source:HGNC Symbol;Acc:HGNC:6081]	protein_coding;non_stop_decay	0	0	0	0	19.5269	15.355	2.56533e-51	9.61036e-48
ENSG00000105647	PIK3R2	ENST00000222254;ENST00000600533;ENST00000464016;ENST00000672815;ENST00000674682;ENST00000675271;ENST00000617130;ENST00000474310;ENST00000426902;ENST00000459743	GO:0001678(cellular glucose homeostasis);GO:0001784(phosphotyrosine residue binding);GO:0005515(protein binding);GO:0005634(nucleus);GO:0005737(cytoplasm);GO:0005829(cytosol);GO:0005925(focal adhesion);GO:0005942(phosphatidylinositol 3-kinase complex);GO:0005943(phosphatidylinositol 3-kinase complex, class IA);GO:0006955(immune response);GO:0007165(signal transduction);GO:0008286(insulin receptor…	01521(EGFR tyrosine kinase inhibitor resistance);01522(Endocrine resistance);01524(Platinum drug resistance);04012(ErbB signaling pathway);04014(Ras signaling pathway);04015(Rap1 signaling pathway);04024(cAMP signaling pathway);04062(Chemokine signaling pathway);04066(HIF-1 signaling pathway);04068(FoxO signaling pathway);04070(Phosphatidylinositol signaling system);04071(Sphingolipid signaling p…	phosphoinositide-3-kinase regulatory subunit 2 [Source:HGNC Symbol;Acc:HGNC:8980]	protein_coding;retained_intron;nonsense_mediated_decay	23.375	28.6514	20.2386	22.4025	0.231663	0.380752	1.97045e-51	9.61036e-48
ENSG00000257921	ENSG00000257921	ENST00000651284;ENST00000471530	GO:0008168(methyltransferase activity);GO:0016279(protein-lysine N-methyltransferase activity);GO:0016740(transferase activity);GO:0018023(peptidyl-lysine trimethylation);GO:0032259(methylation);GO:0032259(methylation)	NA	novel protein	nonsense_mediated_decay	0	0	0.0230987	0	4.84783	4.38093	1.60188e-49	4.80084e-46
ENSG00000100604	CHGA	ENST00000216492;ENST00000553866;ENST00000556098;ENST00000556876	GO:0002026(regulation of the force of heart contraction);GO:0002551(mast cell chemotaxis);GO:0005576(extracellular region);GO:0005615(extracellular space);GO:0006996(organelle organization);GO:0008217(regulation of blood pressure);GO:0030133(transport vesicle);GO:0030141(secretory granule);GO:0031410(cytoplasmic vesicle);GO:0031640(killing of cells of another organism);GO:0033366(protein localiza…	NA	chromogranin A [Source:HGNC Symbol;Acc:HGNC:1929]	protein_coding;processed_transcript;retained_intron	0.88433	0.489377	0.227098	0.272813	16.8429	13.6205	2.62291e-48	6.55072e-45
ENSG00000118271	TTR	ENST00000237014;ENST00000432547;ENST00000649620;ENST00000541025	GO:0005179(hormone activity);GO:0005515(protein binding);GO:0005576(extracellular region);GO:0005615(extracellular space);GO:0005737(cytoplasm);GO:0006144(purine nucleobase metabolic process);GO:0007165(signal transduction);GO:0032991(protein-containing complex);GO:0035578(azurophil granule lumen);GO:0042562(hormone binding);GO:0042572(retinol metabolic process);GO:0042802(identical protein bindi…	04918(Thyroid hormone synthesis);04918(Thyroid hormone synthesis)	transthyretin [Source:HGNC Symbol;Acc:HGNC:12405]	protein_coding;retained_intron	0.155281	0.0701808	0	0	8.5643	5.98914	1.98393e-47	4.24702e-44
ENSG00000110492	MDK	ENST00000395565;ENST00000395566;ENST00000407067;ENST00000405308;ENST00000395569;ENST00000489525;ENST00000441869;ENST00000490240;ENST00000533952;ENST00000359803;ENST00000481047	GO:0001662(behavioral fear response);GO:0002232(leukocyte chemotaxis involved in inflammatory response);GO:0002286(T cell activation involved in immune response);GO:0002690(positive regulation of leukocyte chemotaxis);GO:0005515(protein binding);GO:0005576(extracellular region);GO:0005737(cytoplasm);GO:0007010(cytoskeleton organization);GO:0007162(negative regulation of cell adhesion);GO:0007165(…	NA	midkine [Source:HGNC Symbol;Acc:HGNC:6972]	protein_coding;nonsense_mediated_decay;retained_intron	0.992865	0.64836	0.648721	1.07375	23.0121	42.5225	7.95738e-45	1.49052e-41
ENSG00000171564	FGB	ENST00000302068;ENST00000473984;ENST00000497097	GO:0002250(adaptive immune response);GO:0002376(immune system process);GO:0005102(signaling receptor binding);GO:0005198(structural molecule activity);GO:0005201(extracellular matrix structural constituent);GO:0005515(protein binding);GO:0005576(extracellular region);GO:0005577(fibrinogen complex);GO:0005615(extracellular space);GO:0005737(cytoplasm);GO:0005783(endoplasmic reticulum);GO:0005886(p…	04610(Complement and coagulation cascades);04611(Platelet activation);05171(Coronavirus disease - COVID-19);05171(Coronavirus disease - COVID-19)	fibrinogen beta chain [Source:HGNC Symbol;Acc:HGNC:3662]	protein_coding;retained_intron	0	0.0233552	0	0	3.49094	2.42542	1.31692e-44	2.19267e-41
ENSG00000104112	SCG3	ENST00000220478	GO:0003723(RNA binding);GO:0005515(protein binding);GO:0005576(extracellular region);GO:0005788(endoplasmic reticulum lumen);GO:0016020(membrane);GO:0030133(transport vesicle);GO:0030658(transport vesicle membrane);GO:0030667(secretory granule membrane);GO:0031410(cytoplasmic vesicle);GO:0033366(protein localization to secretory granule);GO:0034774(secretory granule lumen)	NA	secretogranin III [Source:HGNC Symbol;Acc:HGNC:13707]	protein_coding	0	0	0	0	2.64882	2.47605	1.35316e-42	2.02771e-39
ENSG00000162670	BRINP3	ENST00000367462;ENST00000445957;ENST00000633243;ENST00000631494	GO:0005576(extracellular region);GO:0005739(mitochondrion);GO:0005783(endoplasmic reticulum);GO:0007049(cell cycle);GO:0030425(dendrite);GO:0043025(neuronal cell body);GO:0045666(positive regulation of neuron differentiation);GO:0045786(negative regulation of cell cycle);GO:0045930(negative regulation of mitotic cell cycle);GO:0071300(cellular response to retinoic acid);GO:0071300(cellular respon…	NA	BMP/retinoic acid inducible neural specific 3 [Source:HGNC Symbol;Acc:HGNC:22393]	protein_coding;processed_transcript	0	0	0	0.0123758	2.34717	1.78198	7.56052e-42	1.02995e-38
ENSG00000281181	ENSG00000281181	ENST00000627981	GO:0003735(structural constituent of ribosome);GO:0005840(ribosome)	NA	novel transcript, similar to YY1 associated myogenesis RNA 1 YAM1	lncRNA	266.699	166.523	1706.7	1782.14	104.969	113.027	1.03068e-37	1.28707e-34
ENSG00000218537	MIF-AS1	ENST00000406213	NA	NA	MIF antisense RNA 1 [Source:HGNC Symbol;Acc:HGNC:27669]	lncRNA	35.5948	26.9442	30.0372	21.6713	0.787517	0.572898	2.15336e-37	2.48216e-34
ENSG00000280614	ENSG00000280614	ENST00000625598	GO:0003735(structural constituent of ribosome);GO:0005840(ribosome)	NA	novel transcript, similar to YY1 associated myogenesis RNA 1 YAM1	lncRNA	253.443	159.494	1615.12	1727.78	106.887	115.606	7.8858e-37	8.44063e-34
ENSG00000280800	ENSG00000280800	ENST00000631211	GO:0003735(structural constituent of ribosome);GO:0005840(ribosome)	NA	novel transcript, similar to YY1 associated myogenesis RNA 1 YAM1	lncRNA	219.559	143.476	1387.25	1521.5	104.562	113.101	2.74185e-35	2.73911e-32
ENSG00000104435	STMN2	ENST00000220876	GO:0005515(protein binding);GO:0005737(cytoplasm);GO:0005768(endosome);GO:0005794(Golgi apparatus);GO:0005829(cytosol);GO:0007019(microtubule depolymerization);GO:0007026(negative regulation of microtubule depolymerization);GO:0010976(positive regulation of neuron projection development);GO:0010977(negative regulation of neuron projection development);GO:0015631(tubulin binding);GO:0016020(membra…	NA	stathmin 2 [Source:HGNC Symbol;Acc:HGNC:10577]	protein_coding	0	0	0	0	3.26017	2.78341	7.5758e-35	7.09521e-32
ENSG00000281383	ENSG00000281383	ENST00000629969	GO:0003735(structural constituent of ribosome);GO:0005840(ribosome)	NA	novel transcript, similar to YY1 associated myogenesis RNA 1 YAM1	lncRNA	122.358	75.8746	777.391	765.766	52.1887	57.5294	2.77788e-33	2.44862e-30
ENSG00000141469	SLC14A1	ENST00000586142;ENST00000321925;ENST00000644925;ENST00000587601;ENST00000402943;ENST00000589322;ENST00000619403;ENST00000502059;ENST00000586854;ENST00000436407;ENST00000591541;ENST00000535474;ENST00000415427;ENST00000590377;ENST00000591642	GO:0005372(water transmembrane transporter activity);GO:0005515(protein binding);GO:0005886(plasma membrane);GO:0005887(integral component of plasma membrane);GO:0006833(water transport);GO:0015204(urea transmembrane transporter activity);GO:0015265(urea channel activity);GO:0015840(urea transport);GO:0016020(membrane);GO:0016021(integral component of membrane);GO:0016323(basolateral plasma membr…	NA	solute carrier family 14 member 1 (Kidd blood group) [Source:HGNC Symbol;Acc:HGNC:10918]	protein_coding;retained_intron;nonsense_mediated_decay	0.0117619	0.0287379	0.062513	0.0269816	1.75594	1.62622	9.28092e-31	7.72637e-28
ENSG00000267645	ENSG00000267645	ENST00000476151	NA	NA	novel protein, POLR2J2-UPK3BL readthrough	nonsense_mediated_decay	11.2414	4.03094	7.80067	7.66764	0	0	2.38486e-30	1.8809e-27
ENSG00000184363	PKP3	ENST00000331563;ENST00000525642;ENST00000530695;ENST00000526971;ENST00000524646;ENST00000533069	GO:0001533(cornified envelope);GO:0002159(desmosome assembly);GO:0005515(protein binding);GO:0005634(nucleus);GO:0005654(nucleoplasm);GO:0005737(cytoplasm);GO:0005886(plasma membrane);GO:0005911(cell-cell junction);GO:0005912(adherens junction);GO:0007043(cell-cell junction assembly);GO:0007155(cell adhesion);GO:0010628(positive regulation of gene expression);GO:0019899(enzyme binding);GO:0030054…	NA	plakophilin 3 [Source:HGNC Symbol;Acc:HGNC:9025]	protein_coding;processed_transcript;retained_intron	0.218556	0.146679	0.529789	0.650386	5.33442	6.10952	5.5635e-30	3.96996e-27
ENSG00000184709	LRRC26	ENST00000371542	GO:0005249(voltage-gated potassium channel activity);GO:0005515(protein binding);GO:0005737(cytoplasm);GO:0005856(cytoskeleton);GO:0005886(plasma membrane);GO:0005887(integral component of plasma membrane);GO:0006811(ion transport);GO:0008076(voltage-gated potassium channel complex);GO:0015459(potassium channel regulator activity);GO:0016020(membrane);GO:0016021(integral component of membrane);GO…	NA	leucine rich repeat containing 26 [Source:HGNC Symbol;Acc:HGNC:31409]	protein_coding	6.4321	6.76359	4.95108	3.63628	0	0	5.46846e-30	3.96996e-27
ENSG00000259974	LINC00261	ENST00000564492;ENST00000702241;ENST00000609300;ENST00000420070	NA	NA	long intergenic non-protein coding RNA 261 [Source:HGNC Symbol;Acc:HGNC:16189]	lncRNA	0	0.00845679	0	0	0.907553	0.654423	4.69694e-27	3.19926e-24
ENSG00000171951	SCG2	ENST00000305409	GO:0000165(MAPK cascade);GO:0001525(angiogenesis);GO:0001937(negative regulation of endothelial cell proliferation);GO:0001938(positive regulation of endothelial cell proliferation);GO:0005125(cytokine activity);GO:0005515(protein binding);GO:0005576(extracellular region);GO:0005615(extracellular space);GO:0005788(endoplasmic reticulum lumen);GO:0006954(inflammatory response);GO:0009306(protein s…	NA	secretogranin II [Source:HGNC Symbol;Acc:HGNC:10575]	protein_coding	0.0983385	0.166387	0.189137	0.119818	3.78352	3.45219	2.51076e-24	1.63582e-21
ENSG00000175602	CCDC85B	ENST00000312579	GO:0005515(protein binding);GO:0005634(nucleus);GO:0005737(cytoplasm);GO:0005813(centrosome);GO:0005815(microtubule organizing center);GO:0005856(cytoskeleton);GO:0005912(adherens junction);GO:0030054(cell junction);GO:0030154(cell differentiation);GO:0030308(negative regulation of cell growth);GO:0040008(regulation of growth);GO:0045599(negative regulation of fat cell differentiation);GO:0045892…	NA	coiled-coil domain containing 85B [Source:HGNC Symbol;Acc:HGNC:24926]	protein_coding	28.1576	19.8363	17.8896	11.538	0.492294	0.720962	2.76799e-24	1.72826e-21
ENSG00000122641	INHBA	ENST00000242208;ENST00000638023;ENST00000442711	GO:0001541(ovarian follicle development);GO:0001707(mesoderm formation);GO:0001942(hair follicle development);GO:0002244(hematopoietic progenitor cell differentiation);GO:0005102(signaling receptor binding);GO:0005125(cytokine activity);GO:0005179(hormone activity);GO:0005515(protein binding);GO:0005576(extracellular region);GO:0005615(extracellular space);GO:0006357(regulation of transcription b…	04060(Cytokine-cytokine receptor interaction);04350(TGF-beta signaling pathway);04550(Signaling pathways regulating pluripotency of stem cells);04550(Signaling pathways regulating pluripotency of stem cells)	inhibin subunit beta A [Source:HGNC Symbol;Acc:HGNC:6066]	protein_coding	0.369217	0.305379	0.270073	0.175227	4.30905	2.70614	3.28269e-24	1.96764e-21
ENSG00000196684	HSH2D	ENST00000613986;ENST00000616070;ENST00000535834;ENST00000586872;ENST00000616645;ENST00000591154;ENST00000593031	GO:0005515(protein binding);GO:0005634(nucleus);GO:0005737(cytoplasm);GO:0007165(signal transduction);GO:0007165(signal transduction)	NA	hematopoietic SH2 domain containing [Source:HGNC Symbol;Acc:HGNC:24920]	protein_coding;nonsense_mediated_decay;retained_intron	0.363934	0.163049	0.36323	0.265069	4.81921	5.93339	3.76244e-24	2.16847e-21
ENSG00000277957	SENP3-EIF4A1	ENST00000614237	GO:0005634(nucleus);GO:0005730(nucleolus);GO:0006508(proteolysis);GO:0008233(peptidase activity);GO:0008234(cysteine-type peptidase activity);GO:0016787(hydrolase activity);GO:0016926(protein desumoylation);GO:0016929(deSUMOylase activity);GO:0071339(MLL1 complex)	NA	SENP3-EIF4A1 readthrough (NMD candidate) [Source:HGNC Symbol;Acc:HGNC:49182]	nonsense_mediated_decay	21.4891	121.417	23.5574	228.781	0	0	5.84546e-24	3.12836e-21
ENSG00000066405	CLDN18	ENST00000343735	GO:0005198(structural molecule activity);GO:0005515(protein binding);GO:0005886(plasma membrane);GO:0005923(bicellular tight junction);GO:0007155(cell adhesion);GO:0016020(membrane);GO:0016021(integral component of membrane);GO:0016338(calcium-independent cell-cell adhesion via plasma membrane cell-adhesion molecules);GO:0030054(cell junction);GO:0034504(protein localization to nucleus);GO:004280…	04514(Cell adhesion molecules);04530(Tight junction);04670(Leukocyte transendothelial migration);05130(Pathogenic Escherichia coli infection);05160(Hepatitis C)	claudin 18 [Source:HGNC Symbol;Acc:HGNC:2039]	protein_coding	0	0	0	0	1.19123	0.829084	7.39625e-24	3.82182e-21
ENSG00000102109	PCSK1N	ENST00000218230;ENST00000611033	GO:0002021(response to dietary excess);GO:0004866(endopeptidase inhibitor activity);GO:0004867(serine-type endopeptidase inhibitor activity);GO:0005102(signaling receptor binding);GO:0005576(extracellular region);GO:0005615(extracellular space);GO:0005794(Golgi apparatus);GO:0005802(trans-Golgi network);GO:0007218(neuropeptide signaling pathway);GO:0009409(response to cold);GO:0010951(negative re…	NA	proprotein convertase subtilisin/kexin type 1 inhibitor [Source:HGNC Symbol;Acc:HGNC:17301]	protein_coding;processed_transcript	21.3286	12.0265	17.9776	9.65576	0.324186	0.398024	1.23602e-23	6.17392e-21
ENSG00000215030	RPL13P12	ENST00000392730	NA	NA	ribosomal protein L13 pseudogene 12 [Source:HGNC Symbol;Acc:HGNC:35701]	processed_pseudogene	131.41	76.5513	105.339	60.9231	4.31329	5.46862	9.70333e-23	4.69047e-20
ENSG00000166415	WDR72	ENST00000614174;ENST00000567224;ENST00000396328;ENST00000567575	GO:0005515(protein binding);GO:0005634(nucleus);GO:0005737(cytoplasm);GO:0005768(endosome);GO:0022617(extracellular matrix disassembly);GO:0031214(biomineral tissue development);GO:0031410(cytoplasmic vesicle);GO:0070166(enamel mineralization);GO:0072659(protein localization to plasma membrane);GO:0072659(protein localization to plasma membrane)	NA	WD repeat domain 72 [Source:HGNC Symbol;Acc:HGNC:26790]	protein_coding;processed_transcript	3.49107	2.57865	7.57681	6.53929	0.5945	0.597839	2.19442e-21	9.44943e-19
ENSG00000119638	NEK9	ENST00000238616;ENST00000677700;ENST00000555405;ENST00000555961;ENST00000555537;ENST00000553823;ENST00000678037;ENST00000677411	GO:0000166(nucleotide binding);GO:0004672(protein kinase activity);GO:0004674(protein serine/threonine kinase activity);GO:0004712(protein serine/threonine/tyrosine kinase activity);GO:0005515(protein binding);GO:0005524(ATP binding);GO:0005634(nucleus);GO:0005737(cytoplasm);GO:0005813(centrosome);GO:0005829(cytosol);GO:0006468(protein phosphorylation);GO:0007049(cell cycle);GO:0016301(kinase act…	NA	NIMA related kinase 9 [Source:HGNC Symbol;Acc:HGNC:18591]	protein_coding;nonsense_mediated_decay;retained_intron	0.0677807	0.100731	0.0503646	0.0488295	0.995116	0.803739	1.01774e-20	4.23635e-18
ENSG00000165215	CLDN3	ENST00000395145	GO:0001666(response to hypoxia);GO:0001934(positive regulation of protein phosphorylation);GO:0003382(epithelial cell morphogenesis);GO:0004888(transmembrane signaling receptor activity);GO:0005198(structural molecule activity);GO:0005515(protein binding);GO:0005737(cytoplasm);GO:0005886(plasma membrane);GO:0005887(integral component of plasma membrane);GO:0005911(cell-cell junction);GO:0005923(b…	04514(Cell adhesion molecules);04530(Tight junction);04670(Leukocyte transendothelial migration);05130(Pathogenic Escherichia coli infection);05160(Hepatitis C)	claudin 3 [Source:HGNC Symbol;Acc:HGNC:2045]	protein_coding	224.728	156.841	178.175	125.821	14.8524	18.7342	1.17697e-20	4.76672e-18
ENSG00000173467	AGR3	ENST00000310398;ENST00000414935;ENST00000402239;ENST00000486448	GO:0002162(dystroglycan binding);GO:0005515(protein binding);GO:0005783(endoplasmic reticulum);GO:0008150(biological_process);GO:0043231(intracellular membrane-bounded organelle);GO:0060548(negative regulation of cell death);GO:0060548(negative regulation of cell death)	NA	anterior gradient 3, protein disulphide isomerase family member [Source:HGNC Symbol;Acc:HGNC:24167]	protein_coding;retained_intron	16.7073	13.4692	9.07714	5.95536	57.9594	91.3143	2.69239e-20	1.06172e-17
ENSG00000288558	DUS4L-BCAP29	ENST00000673780;ENST00000674049;ENST00000673757;ENST00000673709;ENST00000673970;ENST00000674062;ENST00000673665;ENST00000673689;ENST00000673720;ENST00000673992;ENST00000673784	GO:0002943(tRNA dihydrouridine synthesis);GO:0005783(endoplasmic reticulum);GO:0005789(endoplasmic reticulum membrane);GO:0006886(intracellular protein transport);GO:0008033(tRNA processing);GO:0015031(protein transport);GO:0016020(membrane);GO:0016021(integral component of membrane);GO:0016192(vesicle-mediated transport);GO:0016491(oxidoreductase activity);GO:0017150(tRNA dihydrouridine synthase…	NA	DUS4L-BCAP29 readthrough [Source:HGNC Symbol;Acc:HGNC:54422]	protein_coding;nonsense_mediated_decay	1.54733	1.11558	9.26774	6.02638	0.852746	0.905764	2.03697e-19	7.82668e-17
ENSG00000121361	KCNJ8	ENST00000240662;ENST00000657855;ENST00000665145	GO:0001822(kidney development);GO:0005242(inward rectifier potassium channel activity);GO:0005244(voltage-gated ion channel activity);GO:0005515(protein binding);GO:0005524(ATP binding);GO:0005739(mitochondrion);GO:0005886(plasma membrane);GO:0006811(ion transport);GO:0006813(potassium ion transport);GO:0007507(heart development);GO:0008076(voltage-gated potassium channel complex);GO:0008282(inwa…	04022(cGMP-PKG signaling pathway);04022(cGMP-PKG signaling pathway)	potassium inwardly rectifying channel subfamily J member 8 [Source:HGNC Symbol;Acc:HGNC:6269]	protein_coding;processed_transcript	1.90844	2.32027	3.30318	3.80407	17.3599	16.3451	2.45114e-19	9.18259e-17
ENSG00000132872	SYT4	ENST00000255224;ENST00000589479	GO:0000149(SNARE binding);GO:0001786(phosphatidylserine binding);GO:0005509(calcium ion binding);GO:0005515(protein binding);GO:0005544(calcium-dependent phospholipid binding);GO:0005794(Golgi apparatus);GO:0005886(plasma membrane);GO:0006887(exocytosis);GO:0006906(vesicle fusion);GO:0007269(neurotransmitter secretion);GO:0007613(memory);GO:0014049(positive regulation of glutamate secretion);GO:0…	NA	synaptotagmin 4 [Source:HGNC Symbol;Acc:HGNC:11512]	protein_coding;processed_transcript	0	0	0	0	0.784084	0.507733	5.60224e-19	2.04755e-16
ENSG00000102271	KLHL4	ENST00000373119;ENST00000373114;ENST00000652270	GO:0003674(molecular_function);GO:0003779(actin binding);GO:0005515(protein binding);GO:0005737(cytoplasm);GO:0005856(cytoskeleton);GO:0008150(biological_process);GO:0015630(microtubule cytoskeleton);GO:0034451(centriolar satellite);GO:0034451(centriolar satellite)	NA	kelch like family member 4 [Source:HGNC Symbol;Acc:HGNC:6355]	protein_coding;nonsense_mediated_decay	0.0993681	0.0581471	0.00992743	0	1.13057	0.695761	1.16533e-18	4.15771e-16
ENSG00000243449	C4orf48	ENST00000409248;ENST00000409860	GO:0005576(extracellular region);GO:0005576(extracellular region)	NA	chromosome 4 open reading frame 48 [Source:HGNC Symbol;Acc:HGNC:34437]	protein_coding	10.2836	6.59899	7.1023	3.19218	0	0	1.81277e-18	6.31731e-16
ENSG00000145824	CXCL14	ENST00000337225	GO:0005125(cytokine activity);GO:0005515(protein binding);GO:0005576(extracellular region);GO:0005615(extracellular space);GO:0005794(Golgi apparatus);GO:0006935(chemotaxis);GO:0006955(immune response);GO:0007165(signal transduction);GO:0007267(cell-cell signaling);GO:0008009(chemokine activity);GO:0045662(negative regulation of myoblast differentiation);GO:0048839(inner ear development);GO:00603…	04060(Cytokine-cytokine receptor interaction);04061(Viral protein interaction with cytokine and cytokine receptor);04062(Chemokine signaling pathway)	C-X-C motif chemokine ligand 14 [Source:HGNC Symbol;Acc:HGNC:10640]	protein_coding	0.0285141	0	0	0	1.27113	1.96683	3.039e-18	1.03499e-15
ENSG00000128045	RASL11B	ENST00000248706;ENST00000505041;ENST00000515677	GO:0000166(nucleotide binding);GO:0003924(GTPase activity);GO:0003925(G protein activity);GO:0005160(transforming growth factor beta receptor binding);GO:0005515(protein binding);GO:0005525(GTP binding);GO:0016787(hydrolase activity);GO:0030512(negative regulation of transforming growth factor beta receptor signaling pathway);GO:0030512(negative regulation of transforming growth factor beta recep…	NA	RAS like family 11 member B [Source:HGNC Symbol;Acc:HGNC:23804]	protein_coding;processed_transcript;retained_intron	1.47408	0.939519	2.1902	1.08193	0	0	3.83616e-18	1.27744e-15
ENSG00000125851	PCSK2	ENST00000262545;ENST00000470007;ENST00000459871	GO:0004175(endopeptidase activity);GO:0004252(serine-type endopeptidase activity);GO:0005515(protein binding);GO:0005576(extracellular region);GO:0005615(extracellular space);GO:0005654(nucleoplasm);GO:0006508(proteolysis);GO:0007399(nervous system development);GO:0008233(peptidase activity);GO:0008236(serine-type peptidase activity);GO:0016020(membrane);GO:0016485(protein processing);GO:0016486(…	NA	proprotein convertase subtilisin/kexin type 2 [Source:HGNC Symbol;Acc:HGNC:8744]	protein_coding;processed_transcript	0	0	0.00677722	0	0.462826	0.412858	4.7369e-18	1.5431e-15
ENSG00000130600	H19	ENST00000701032;ENST00000439725;ENST00000691195;ENST00000436715;ENST00000442037;ENST00000412788;ENST00000414790;ENST00000431095;ENST00000411861;ENST00000447298	NA	NA	H19 imprinted maternally expressed transcript [Source:HGNC Symbol;Acc:HGNC:4713]	lncRNA;retained_intron	84.6358	78.5026	35.7036	37.8064	11.1799	11.3959	6.34206e-18	1.99227e-15
ENSG00000170289	CNGB3	ENST00000681746;ENST00000517327	GO:0000166(nucleotide binding);GO:0001750(photoreceptor outer segment);GO:0005222(intracellular cAMP-activated cation channel activity);GO:0005223(intracellular cGMP-activated cation channel activity);GO:0005886(plasma membrane);GO:0006811(ion transport);GO:0006812(cation transport);GO:0007165(signal transduction);GO:0007601(visual perception);GO:0016020(membrane);GO:0016021(integral component of…	04024(cAMP signaling pathway);04024(cAMP signaling pathway)	cyclic nucleotide gated channel subunit beta 3 [Source:HGNC Symbol;Acc:HGNC:2153]	nonsense_mediated_decay;protein_coding	0.906952	0.6137	1.73373	1.32439	0.0466793	0.0253447	6.38166e-18	1.99227e-15
ENSG00000113083	LOX	ENST00000231004;ENST00000639739;ENST00000508067;ENST00000503759;ENST00000505593	GO:0001568(blood vessel development);GO:0001649(osteoblast differentiation);GO:0001932(regulation of protein phosphorylation);GO:0004720(protein-lysine 6-oxidase activity);GO:0005507(copper ion binding);GO:0005515(protein binding);GO:0005518(collagen binding);GO:0005576(extracellular region);GO:0005581(collagen trimer);GO:0005615(extracellular space);GO:0005634(nucleus);GO:0007507(heart developme…	NA	lysyl oxidase [Source:HGNC Symbol;Acc:HGNC:6664]	protein_coding;nonsense_mediated_decay;processed_transcript	2.20496	2.52832	1.04977	0.391199	0.0374895	0.0612476	1.54979e-17	4.73952e-15
ENSG00000085662	AKR1B1	ENST00000285930;ENST00000462784;ENST00000498771;ENST00000491741;ENST00000426422;ENST00000484592;ENST00000465351;ENST00000434222;ENST00000467251;ENST00000498373	GO:0001523(retinoid metabolic process);GO:0001758(retinal dehydrogenase activity);GO:0002070(epithelial cell maturation);GO:0003091(renal water homeostasis);GO:0004032(alditol:NADP+ 1-oxidoreductase activity);GO:0005515(protein binding);GO:0005615(extracellular space);GO:0005654(nucleoplasm);GO:0005737(cytoplasm);GO:0005829(cytosol);GO:0005975(carbohydrate metabolic process);GO:0006629(lipid meta…	00040(Pentose and glucuronate interconversions);00051(Fructose and mannose metabolism);00052(Galactose metabolism);00561(Glycerolipid metabolism);00790(Folate biosynthesis);01100(Metabolic pathways);01100(Metabolic pathways)	aldo-keto reductase family 1 member B [Source:HGNC Symbol;Acc:HGNC:381]	protein_coding;retained_intron;nonsense_mediated_decay	1.13769	1.0469	6.13322	4.71289	0.470439	0.413474	1.60927e-17	4.82298e-15
ENSG00000126709	IFI6	ENST00000339145;ENST00000361157;ENST00000362020;ENST00000679644	GO:0001836(release of cytochrome c from mitochondria);GO:0002376(immune system process);GO:0005515(protein binding);GO:0005739(mitochondrion);GO:0005743(mitochondrial inner membrane);GO:0005886(plasma membrane);GO:0006915(apoptotic process);GO:0006955(immune response);GO:0016020(membrane);GO:0016021(integral component of membrane);GO:0031966(mitochondrial membrane);GO:0042058(regulation of epider…	NA	interferon alpha inducible protein 6 [Source:HGNC Symbol;Acc:HGNC:4054]	protein_coding	78.3877	43.3264	125.297	54.7643	1.54905	4.02025	2.34267e-17	6.88332e-15
ENSG00000139219	COL2A1	ENST00000380518;ENST00000465743;ENST00000466884;ENST00000483376;ENST00000490609;ENST00000546974	GO:0001501(skeletal system development);GO:0001502(cartilage condensation);GO:0001503(ossification);GO:0001894(tissue homeostasis);GO:0001958(endochondral ossification);GO:0002062(chondrocyte differentiation);GO:0003007(heart morphogenesis);GO:0005201(extracellular matrix structural constituent);GO:0005515(protein binding);GO:0005576(extracellular region);GO:0005581(collagen trimer);GO:0005585(co…	04151(PI3K-Akt signaling pathway);04510(Focal adhesion);04512(ECM-receptor interaction);04974(Protein digestion and absorption);05165(Human papillomavirus infection);05165(Human papillomavirus infection)	collagen type II alpha 1 chain [Source:HGNC Symbol;Acc:HGNC:2200]	protein_coding;processed_transcript;retained_intron	0.00845344	0.00931002	0	0.0353471	1.09068	0.80146	2.4893e-17	7.17349e-15
ENSG00000183091	NEB	ENST00000427231;ENST00000409198;ENST00000688161;ENST00000690043;ENST00000483418;ENST00000693000;ENST00000480784;ENST00000689642;ENST00000497809;ENST00000397345	GO:0003779(actin binding);GO:0005515(protein binding);GO:0005737(cytoplasm);GO:0005829(cytosol);GO:0005856(cytoskeleton);GO:0007517(muscle organ development);GO:0007525(somatic muscle development);GO:0008307(structural constituent of muscle);GO:0015629(actin cytoskeleton);GO:0030017(sarcomere);GO:0030018(Z disc);GO:0030832(regulation of actin filament length);GO:0043292(contractile fiber);GO:0051…	NA	nebulin [Source:HGNC Symbol;Acc:HGNC:7720]	protein_coding;retained_intron	0.0282826	0.0242771	0.15893	0.370072	0.00134115	0.00706277	8.63049e-17	2.39496e-14
ENSG00000026508	CD44	ENST00000434472;ENST00000428726;ENST00000263398;ENST00000433892;ENST00000415148;ENST00000527889;ENST00000279452;ENST00000525211;ENST00000278385;ENST00000525348;ENST00000531110;ENST00000527326;ENST00000442151;ENST00000278386;ENST00000525688;ENST00000528455;ENST00000531141;ENST00000534082;ENST00000534296;ENST00000525685;ENST00000526553;ENST00000533222;ENST00000532339;ENST00000525209;ENST00000525241…	GO:0004888(transmembrane signaling receptor activity);GO:0004896(cytokine receptor activity);GO:0005515(protein binding);GO:0005518(collagen binding);GO:0005540(hyaluronic acid binding);GO:0005794(Golgi apparatus);GO:0005829(cytosol);GO:0005886(plasma membrane);GO:0005887(integral component of plasma membrane);GO:0005902(microvillus);GO:0005925(focal adhesion);GO:0006954(inflammatory response);GO…	04512(ECM-receptor interaction);04640(Hematopoietic cell lineage);05131(Shigellosis);05169(Epstein-Barr virus infection);05205(Proteoglycans in cancer);05206(MicroRNAs in cancer);05206(MicroRNAs in cancer)	CD44 molecule (Indian blood group) [Source:HGNC Symbol;Acc:HGNC:1681]	protein_coding;retained_intron;processed_transcript	3.18272	3.30619	3.5176	4.13157	14.2907	17.0948	1.04248e-16	2.79615e-14
ENSG00000110195	FOLR1	ENST00000393676;ENST00000312293	GO:0000139(Golgi membrane);GO:0001947(heart looping);GO:0003147(neural crest cell migration involved in heart formation);GO:0003253(cardiac neural crest cell migration involved in outflow tract morphogenesis);GO:0005515(protein binding);GO:0005542(folic acid binding);GO:0005576(extracellular region);GO:0005634(nucleus);GO:0005768(endosome);GO:0005789(endoplasmic reticulum membrane);GO:0005886(pla…	01523(Antifolate resistance);04144(Endocytosis);04144(Endocytosis)	folate receptor alpha [Source:HGNC Symbol;Acc:HGNC:3791]	protein_coding	15.2513	8.81426	9.80365	10.1123	0.807672	0.834236	1.04494e-16	2.79615e-14
ENSG00000104722	NEFM	ENST00000221166;ENST00000433454	GO:0005198(structural molecule activity);GO:0005200(structural constituent of cytoskeleton);GO:0005515(protein binding);GO:0005737(cytoplasm);GO:0005856(cytoskeleton);GO:0005882(intermediate filament);GO:0005883(neurofilament);GO:0008017(microtubule binding);GO:0030424(axon);GO:0033693(neurofilament bundle assembly);GO:0042995(cell projection);GO:0045109(intermediate filament organization);GO:004…	05014(Amyotrophic lateral sclerosis);05022(Pathways of neurodegeneration - multiple diseases);05022(Pathways of neurodegeneration - multiple diseases)	neurofilament medium chain [Source:HGNC Symbol;Acc:HGNC:7734]	protein_coding	0.0482974	0	0.0637247	0.0145481	2.57679	1.61593	1.48641e-16	3.84033e-14
ENSG00000103254	ANTKMT	ENST00000219535;ENST00000566437;ENST00000569529;ENST00000564000;ENST00000566525;ENST00000570237;ENST00000564640;ENST00000568916	GO:0005515(protein binding);GO:0005739(mitochondrion);GO:0006479(protein methylation);GO:0008168(methyltransferase activity);GO:0016020(membrane);GO:0016021(integral component of membrane);GO:0016279(protein-lysine N-methyltransferase activity);GO:0016740(transferase activity);GO:0018023(peptidyl-lysine trimethylation);GO:0031966(mitochondrial membrane);GO:0032259(methylation);GO:1905273(positive…	NA	adenine nucleotide translocase lysine methyltransferase [Source:HGNC Symbol;Acc:HGNC:14152]	protein_coding;retained_intron	7.5737	5.15972	7.81251	5.32191	0.332208	0.421209	1.46698e-16	3.84033e-14
ENSG00000130303	BST2	ENST00000252593;ENST00000527220;ENST00000533098	GO:0002376(immune system process);GO:0002737(negative regulation of plasmacytoid dendritic cell cytokine production);GO:0003723(RNA binding);GO:0005515(protein binding);GO:0005737(cytoplasm);GO:0005768(endosome);GO:0005770(late endosome);GO:0005771(multivesicular body);GO:0005794(Golgi apparatus);GO:0005886(plasma membrane);GO:0008191(metalloendopeptidase inhibitor activity);GO:0009615(response t…	05168(Herpes simplex virus 1 infection);05170(Human immunodeficiency virus 1 infection);05170(Human immunodeficiency virus 1 infection)	bone marrow stromal cell antigen 2 [Source:HGNC Symbol;Acc:HGNC:1119]	protein_coding;nonsense_mediated_decay;retained_intron	80.2333	47.6321	78.6873	49.0753	6.43459	7.42193	3.24831e-16	8.11265e-14
ENSG00000079689	SCGN	ENST00000377961	GO:0005509(calcium ion binding);GO:0005515(protein binding);GO:0005576(extracellular region);GO:0005634(nucleus);GO:0005737(cytoplasm);GO:0005829(cytosol);GO:0008150(biological_process);GO:0016020(membrane);GO:0030425(dendrite);GO:0030658(transport vesicle membrane);GO:0031410(cytoplasmic vesicle);GO:0043005(neuron projection);GO:0043195(terminal bouton);GO:0045202(synapse);GO:0046872(metal ion b…	NA	secretagogin, EF-hand calcium binding protein [Source:HGNC Symbol;Acc:HGNC:16941]	protein_coding	0	0	0	0	1.53698	1.42897	3.37904e-16	8.3008e-14
ENSG00000130748	TMEM160	ENST00000253047	GO:0005515(protein binding);GO:0016020(membrane);GO:0016021(integral component of membrane)	NA	transmembrane protein 160 [Source:HGNC Symbol;Acc:HGNC:26042]	protein_coding	16.7607	9.94268	12.3824	5.93646	0.326812	0.103139	3.75452e-16	9.07444e-14
ENSG00000167755	KLK6	ENST00000310157;ENST00000376851;ENST00000594641;ENST00000597379;ENST00000391808;ENST00000599690;ENST00000599881	GO:0001533(cornified envelope);GO:0004252(serine-type endopeptidase activity);GO:0005515(protein binding);GO:0005576(extracellular region);GO:0005615(extracellular space);GO:0005634(nucleus);GO:0005730(nucleolus);GO:0005737(cytoplasm);GO:0005739(mitochondrion);GO:0005783(endoplasmic reticulum);GO:0006508(proteolysis);GO:0007417(central nervous system development);GO:0008233(peptidase activity);GO…	NA	kallikrein related peptidase 6 [Source:HGNC Symbol;Acc:HGNC:6367]	protein_coding;nonsense_mediated_decay	13.9173	9.99715	2.69653	1.93036	1.16103	1.23738	4.2372e-16	1.00785e-13
ENSG00000176597	B3GNT5	ENST00000326505;ENST00000462559;ENST00000464191;ENST00000480551	GO:0000139(Golgi membrane);GO:0005515(protein binding);GO:0005794(Golgi apparatus);GO:0006486(protein glycosylation);GO:0006629(lipid metabolic process);GO:0007417(central nervous system development);GO:0007420(brain development);GO:0008457(beta-galactosyl-N-acetylglucosaminylgalactosylglucosyl-ceramide beta-1,3-acetylglucosaminyltransferase activity);GO:0008499(UDP-galactose:beta-N-acetylglucosa…	00601(Glycosphingolipid biosynthesis - lacto and neolacto series);01100(Metabolic pathways);01100(Metabolic pathways)	UDP-GlcNAc:betaGal beta-1,3-N-acetylglucosaminyltransferase 5 [Source:HGNC Symbol;Acc:HGNC:15684]	protein_coding;processed_transcript	0.646548	0.756245	0.784378	0.606413	4.01844	4.01899	5.16656e-16	1.2097e-13
ENSG00000075790	BCAP29	ENST00000005259;ENST00000445771;ENST00000494086;ENST00000491150;ENST00000436699;ENST00000465919;ENST00000479917;ENST00000486326;ENST00000473124;ENST00000466094;ENST00000442065;ENST00000482371;ENST00000490060;ENST00000457837	GO:0001649(osteoblast differentiation);GO:0005783(endoplasmic reticulum);GO:0005789(endoplasmic reticulum membrane);GO:0006886(intracellular protein transport);GO:0006888(endoplasmic reticulum to Golgi vesicle-mediated transport);GO:0006915(apoptotic process);GO:0015031(protein transport);GO:0016020(membrane);GO:0016021(integral component of membrane);GO:0016192(vesicle-mediated transport);GO:007…	NA	B cell receptor associated protein 29 [Source:HGNC Symbol;Acc:HGNC:24131]	protein_coding;processed_transcript;retained_intron;nonsense_mediated_decay	7.37984	7.56447	1.11921	1.68288	10.251	12.6632	5.51127e-16	1.27056e-13
ENSG00000198797	BRINP2	ENST00000361539;ENST00000478325;ENST00000460161	GO:0005576(extracellular region);GO:0005783(endoplasmic reticulum);GO:0007049(cell cycle);GO:0007399(nervous system development);GO:0030425(dendrite);GO:0043025(neuronal cell body);GO:0045666(positive regulation of neuron differentiation);GO:0045786(negative regulation of cell cycle);GO:0045930(negative regulation of mitotic cell cycle);GO:0071300(cellular response to retinoic acid);GO:0071300(ce…	NA	BMP/retinoic acid inducible neural specific 2 [Source:HGNC Symbol;Acc:HGNC:13746]	protein_coding;processed_transcript	0.536389	0.711455	0.459419	0.553024	4.18591	4.09582	6.68224e-16	1.49453e-13
ENSG00000134827	TCN1	ENST00000257264;ENST00000529251;ENST00000533734	GO:0005515(protein binding);GO:0005576(extracellular region);GO:0005615(extracellular space);GO:0006811(ion transport);GO:0006824(cobalt ion transport);GO:0015889(cobalamin transport);GO:0031419(cobalamin binding);GO:0035580(specific granule lumen);GO:1904724(tertiary granule lumen);GO:1904724(tertiary granule lumen)	NA	transcobalamin 1 [Source:HGNC Symbol;Acc:HGNC:11652]	protein_coding;retained_intron;processed_transcript	0	0.103431	0.121852	0.064002	3.54867	2.73603	2.45172e-15	5.32449e-13
ENSG00000255794	RMST	ENST00000687565;ENST00000552411;ENST00000639542;ENST00000547946;ENST00000667445;ENST00000667306;ENST00000665975;ENST00000658877;ENST00000640149	NA	NA	rhabdomyosarcoma 2 associated transcript [Source:HGNC Symbol;Acc:HGNC:29893]	lncRNA;retained_intron	0.0248057	0.0100641	0.00562974	0.0177053	0.389062	0.448022	7.69416e-15	1.6471e-12
ENSG00000230836	LINC01293	ENST00000453951	NA	NA	long intergenic non-protein coding RNA 1293 [Source:HGNC Symbol;Acc:HGNC:50362]	lncRNA	0.24973	0.864009	0.571682	0.890356	8.63265	8.72047	1.04331e-14	2.20196e-12
ENSG00000124780	KCNK17	ENST00000373231;ENST00000453413;ENST00000503878	GO:0005244(voltage-gated ion channel activity);GO:0005267(potassium channel activity);GO:0005886(plasma membrane);GO:0005887(integral component of plasma membrane);GO:0006811(ion transport);GO:0006813(potassium ion transport);GO:0016020(membrane);GO:0016021(integral component of membrane);GO:0022841(potassium ion leak channel activity);GO:0030322(stabilization of membrane potential);GO:0034765(re…	NA	potassium two pore domain channel subfamily K member 17 [Source:HGNC Symbol;Acc:HGNC:14465]	protein_coding;retained_intron	0	0	0	0	1.07087	0.787702	1.25441e-14	2.61075e-12
ENSG00000127774	EMC6	ENST00000248378;ENST00000397133	GO:0000045(autophagosome assembly);GO:0005515(protein binding);GO:0005783(endoplasmic reticulum);GO:0005789(endoplasmic reticulum membrane);GO:0006996(organelle organization);GO:0016020(membrane);GO:0016021(integral component of membrane);GO:0030176(integral component of endoplasmic reticulum membrane);GO:0032977(membrane insertase activity);GO:0045050(protein insertion into ER membrane by stop-t…	NA	ER membrane protein complex subunit 6 [Source:HGNC Symbol;Acc:HGNC:28430]	protein_coding	47.3961	34.717	36.3051	27.1096	1.07377	3.38906	1.94402e-14	3.99057e-12
ENSG00000240972	MIF	ENST00000215754;ENST00000465752;ENST00000498385	GO:0001516(prostaglandin biosynthetic process);GO:0001819(positive regulation of cytokine production);GO:0001934(positive regulation of protein phosphorylation);GO:0002020(protease binding);GO:0002376(immune system process);GO:0002906(negative regulation of mature B cell apoptotic process);GO:0004167(dopachrome isomerase activity);GO:0005125(cytokine activity);GO:0005126(cytokine receptor binding…	00350(Tyrosine metabolism);00360(Phenylalanine metabolism);01100(Metabolic pathways);01100(Metabolic pathways)	macrophage migration inhibitory factor [Source:HGNC Symbol;Acc:HGNC:7097]	protein_coding;retained_intron	344.602	226.614	264.963	200.758	34.6058	45.4623	2.36717e-14	4.79352e-12
ENSG00000188483	IER5L	ENST00000372491	NA	NA	immediate early response 5 like [Source:HGNC Symbol;Acc:HGNC:23679]	protein_coding	20.2584	14.1285	18.8808	14.0152	2.21303	2.66423	2.63357e-14	5.26188e-12
ENSG00000189377	CXCL17	ENST00000601181	GO:0001525(angiogenesis);GO:0005515(protein binding);GO:0005576(extracellular region);GO:0005615(extracellular space);GO:0006935(chemotaxis);GO:0010575(positive regulation of vascular endothelial growth factor production);GO:0010759(positive regulation of macrophage chemotaxis);GO:0030154(cell differentiation);GO:0048246(macrophage chemotaxis);GO:0050728(negative regulation of inflammatory respon…	04060(Cytokine-cytokine receptor interaction)	C-X-C motif chemokine ligand 17 [Source:HGNC Symbol;Acc:HGNC:19232]	protein_coding	7.56072	6.4856	1.88719	1.15887	0.291532	0.374683	3.13689e-14	6.18504e-12
ENSG00000117152	RGS4	ENST00000367909;ENST00000421743;ENST00000491263	GO:0001965(G-protein alpha-subunit binding);GO:0001975(response to amphetamine);GO:0003924(GTPase activity);GO:0005096(GTPase activator activity);GO:0005516(calmodulin binding);GO:0005634(nucleus);GO:0005737(cytoplasm);GO:0005829(cytosol);GO:0005886(plasma membrane);GO:0007186(G protein-coupled receptor signaling pathway);GO:0007420(brain development);GO:0008277(regulation of G protein-coupled re…	NA	regulator of G protein signaling 4 [Source:HGNC Symbol;Acc:HGNC:10000]	protein_coding;processed_transcript	0.040041	0.032991	0	0.0335469	1.13291	0.762256	3.26403e-14	6.35214e-12
ENSG00000135333	EPHA7	ENST00000369303;ENST00000680224;ENST00000681503;ENST00000369297;ENST00000680896;ENST00000680608;ENST00000681130;ENST00000681532;ENST00000681798;ENST00000681287;ENST00000680082;ENST00000680190;ENST00000679915;ENST00000681729	GO:0000166(nucleotide binding);GO:0001934(positive regulation of protein phosphorylation);GO:0004672(protein kinase activity);GO:0004712(protein serine/threonine/tyrosine kinase activity);GO:0004713(protein tyrosine kinase activity);GO:0004714(transmembrane receptor protein tyrosine kinase activity);GO:0005003(ephrin receptor activity);GO:0005004(GPI-linked ephrin receptor activity);GO:0005005(tr…	04360(Axon guidance);04360(Axon guidance)	EPH receptor A7 [Source:HGNC Symbol;Acc:HGNC:3390]	protein_coding;processed_transcript;retained_intron;nonsense_mediated_decay	0.148518	0.276603	0.326969	0.475278	2.03275	1.69952	4.4423e-14	8.53434e-12
ENSG00000106211	HSPB1	ENST00000675906;ENST00000674638;ENST00000674650;ENST00000447574;ENST00000248553;ENST00000674965;ENST00000429938;ENST00000676398;ENST00000675488;ENST00000676231;ENST00000675417;ENST00000674547	GO:0000502(proteasome complex);GO:0001533(cornified envelope);GO:0001895(retina homeostasis);GO:0001932(regulation of protein phosphorylation);GO:0003723(RNA binding);GO:0005080(protein kinase C binding);GO:0005515(protein binding);GO:0005615(extracellular space);GO:0005634(nucleus);GO:0005737(cytoplasm);GO:0005819(spindle);GO:0005829(cytosol);GO:0005856(cytoskeleton);GO:0005886(plasma membrane);…	04010(MAPK signaling pathway);04370(VEGF signaling pathway);05146(Amoebiasis);05146(Amoebiasis)	heat shock protein family B (small) member 1 [Source:HGNC Symbol;Acc:HGNC:5246]	protein_coding;retained_intron;nonsense_mediated_decay;processed_transcript	2063.99	1210.25	1265.29	848.515	126.398	247.996	6.52492e-14	1.23767e-11
ENSG00000241697	TMEFF1	ENST00000374879	GO:0005102(signaling receptor binding);GO:0005515(protein binding);GO:0005604(basement membrane);GO:0005886(plasma membrane);GO:0008045(motor neuron axon guidance);GO:0009887(animal organ morphogenesis);GO:0009888(tissue development);GO:0016020(membrane);GO:0016021(integral component of membrane);GO:0016358(dendrite development)	NA	transmembrane protein with EGF like and two follistatin like domains 1 [Source:HGNC Symbol;Acc:HGNC:11866]	protein_coding	0	0.019274	3.57934	0.60668	2.00975	2.39509	6.66799e-14	1.249e-11
ENSG00000169851	PCDH7	ENST00000621961;ENST00000695919;ENST00000511884;ENST00000361762;ENST00000543491;ENST00000509759;ENST00000695923	GO:0005509(calcium ion binding);GO:0005886(plasma membrane);GO:0005887(integral component of plasma membrane);GO:0007155(cell adhesion);GO:0007156(homophilic cell adhesion via plasma membrane adhesion molecules);GO:0016020(membrane);GO:0016021(integral component of membrane);GO:0031092(platelet alpha granule membrane);GO:0031092(platelet alpha granule membrane)	NA	protocadherin 7 [Source:HGNC Symbol;Acc:HGNC:8659]	protein_coding;retained_intron	0.866781	1.46348	0.289379	0.59615	6.13706	3.32549	7.34079e-14	1.35805e-11
ENSG00000283293	RN7SK	ENST00000636484	NA	NA	RNA component of 7SK nuclear ribonucleoprotein [Source:HGNC Symbol;Acc:HGNC:10037]	snRNA	6.26419	4.1458	34.7054	40.1358	4.83819	3.53833	1.12147e-13	2.04941e-11
ENSG00000181029	TRAPPC5	ENST00000317378;ENST00000596148;ENST00000426877;ENST00000595985	GO:0005515(protein binding);GO:0005737(cytoplasm);GO:0005783(endoplasmic reticulum);GO:0005794(Golgi apparatus);GO:0005829(cytosol);GO:0006888(endoplasmic reticulum to Golgi vesicle-mediated transport);GO:0006901(vesicle coating);GO:0016192(vesicle-mediated transport);GO:0030008(TRAPP complex);GO:0048193(Golgi vesicle transport);GO:0048208(COPII vesicle coating);GO:0099022(vesicle tethering);GO:1…	NA	trafficking protein particle complex subunit 5 [Source:HGNC Symbol;Acc:HGNC:23067]	protein_coding	4.99846	3.20708	3.20491	2.43143	0.408041	0.412211	1.50443e-13	2.71613e-11
ENSG00000218891	ZNF579	ENST00000592239;ENST00000325421	GO:0000976(transcription cis-regulatory region binding);GO:0000981(DNA-binding transcription factor activity, RNA polymerase II-specific);GO:0003677(DNA binding);GO:0003723(RNA binding);GO:0005634(nucleus);GO:0006357(regulation of transcription by RNA polymerase II);GO:0046872(metal ion binding);GO:0046872(metal ion binding)	NA	zinc finger protein 579 [Source:HGNC Symbol;Acc:HGNC:26646]	protein_coding	7.25217	6.67707	6.05711	5.76594	0.940902	0.954045	1.52426e-13	2.71917e-11
ENSG00000100095	SEZ6L	ENST00000248933;ENST00000483291	GO:0005515(protein binding);GO:0005783(endoplasmic reticulum);GO:0005789(endoplasmic reticulum membrane);GO:0016020(membrane);GO:0016021(integral component of membrane);GO:0016021(integral component of membrane)	NA	seizure related 6 homolog like [Source:HGNC Symbol;Acc:HGNC:10763]	protein_coding;retained_intron	0	0	0	0.00728552	0.314577	0.273917	1.56802e-13	2.76432e-11
ENSG00000182154	MRPL41	ENST00000371443	GO:0003723(RNA binding);GO:0003735(structural constituent of ribosome);GO:0005515(protein binding);GO:0005739(mitochondrion);GO:0005743(mitochondrial inner membrane);GO:0005762(mitochondrial large ribosomal subunit);GO:0005840(ribosome);GO:0006412(translation);GO:0006915(apoptotic process);GO:0007049(cell cycle);GO:0032543(mitochondrial translation);GO:1990904(ribonucleoprotein complex)	NA	mitochondrial ribosomal protein L41 [Source:HGNC Symbol;Acc:HGNC:14492]	protein_coding	171.288	108.451	152.972	83.4375	11.4037	18.5059	2.13502e-13	3.72015e-11
ENSG00000185499	MUC1	ENST00000462317;ENST00000620103;ENST00000468978;ENST00000620770;ENST00000615517;ENST00000368389;ENST00000485118;ENST00000368390;ENST00000610359;ENST00000337604;ENST00000462215;ENST00000467134;ENST00000466913;ENST00000368393;ENST00000338684;ENST00000368398;ENST00000368392;ENST00000614519;ENST00000457295	GO:0000785(chromatin);GO:0000978(RNA polymerase II cis-regulatory region sequence-specific DNA binding);GO:0002039(p53 binding);GO:0003712(transcription coregulator activity);GO:0005515(protein binding);GO:0005576(extracellular region);GO:0005615(extracellular space);GO:0005634(nucleus);GO:0005737(cytoplasm);GO:0005796(Golgi lumen);GO:0005886(plasma membrane);GO:0005887(integral component of plas…	NA	mucin 1, cell surface associated [Source:HGNC Symbol;Acc:HGNC:7508]	protein_coding;retained_intron;nonsense_mediated_decay;processed_transcript	7.59258	4.65637	7.7092	9.04626	31.9805	29.4509	4.08892e-13	7.04281e-11
ENSG00000170801	HTRA3	ENST00000307358;ENST00000382512	GO:0004175(endopeptidase activity);GO:0004252(serine-type endopeptidase activity);GO:0005515(protein binding);GO:0005576(extracellular region);GO:0006508(proteolysis);GO:0008233(peptidase activity);GO:0008236(serine-type peptidase activity);GO:0016787(hydrolase activity);GO:0030512(negative regulation of transforming growth factor beta receptor signaling pathway);GO:0030514(negative regulation of…	NA	HtrA serine peptidase 3 [Source:HGNC Symbol;Acc:HGNC:30406]	protein_coding	0.0666742	0.0297849	0.787674	0.642825	0	0	5.12993e-13	8.73545e-11
ENSG00000128228	SDF2L1	ENST00000248958;ENST00000466935	GO:0005515(protein binding);GO:0005783(endoplasmic reticulum);GO:0005788(endoplasmic reticulum lumen);GO:0016020(membrane);GO:0034663(endoplasmic reticulum chaperone complex);GO:0034976(response to endoplasmic reticulum stress);GO:0042981(regulation of apoptotic process);GO:0051085(chaperone cofactor-dependent protein refolding);GO:0051087(chaperone binding);GO:0051117(ATPase binding);GO:0051787(…	NA	stromal cell derived factor 2 like 1 [Source:HGNC Symbol;Acc:HGNC:10676]	protein_coding;retained_intron	12.0908	8.77091	6.8252	6.74344	0.802573	0.87888	6.92171e-13	1.16541e-10
ENSG00000131188	PRR7	ENST00000502922;ENST00000323249;ENST00000510492;ENST00000507881	GO:0002250(adaptive immune response);GO:0002376(immune system process);GO:0005515(protein binding);GO:0005634(nucleus);GO:0005654(nucleoplasm);GO:0005737(cytoplasm);GO:0005829(cytosol);GO:0005886(plasma membrane);GO:0010942(positive regulation of cell death);GO:0014069(postsynaptic density);GO:0016020(membrane);GO:0016021(integral component of membrane);GO:0030054(cell junction);GO:0030425(dendri…	NA	proline rich 7, synaptic [Source:HGNC Symbol;Acc:HGNC:28130]	protein_coding	9.12534	7.09291	8.65975	6.26264	0.854684	0.8983	7.2547e-13	1.20791e-10
ENSG00000184897	H1-10	ENST00000333762	GO:0000786(nucleosome);GO:0003677(DNA binding);GO:0003690(double-stranded DNA binding);GO:0003723(RNA binding);GO:0005634(nucleus);GO:0005654(nucleoplasm);GO:0005694(chromosome);GO:0005730(nucleolus);GO:0006334(nucleosome assembly);GO:0030261(chromosome condensation);GO:0030527(structural constituent of chromatin);GO:0031492(nucleosomal DNA binding);GO:0045296(cadherin binding);GO:0045910(negativ…	NA	H1.10 linker histone [Source:HGNC Symbol;Acc:HGNC:4722]	protein_coding	110.068	83.4635	101.302	67.9588	16.6312	17.3165	1.03219e-12	1.69971e-10
ENSG00000290058	ENSG00000290058	ENST00000702711	NA	NA	novel transcript, antisense to NUDT19	lncRNA	0.828949	0.849134	0.124593	0.108142	6.22917	6.19205	2.17299e-12	3.53938e-10
ENSG00000107014	RLN2	ENST00000381627;ENST00000416837	GO:0005179(hormone activity);GO:0005576(extracellular region);GO:0007165(signal transduction);GO:0007565(female pregnancy);GO:0010628(positive regulation of gene expression);GO:0045766(positive regulation of angiogenesis);GO:0050790(regulation of catalytic activity);GO:0050790(regulation of catalytic activity)	04080(Neuroactive ligand-receptor interaction);04926(Relaxin signaling pathway);04926(Relaxin signaling pathway)	relaxin 2 [Source:HGNC Symbol;Acc:HGNC:10027]	protein_coding	5.66083	4.41589	4.57	3.74562	19.2359	29.973	2.3448e-12	3.77815e-10
ENSG00000162944	RFTN2	ENST00000295049;ENST00000494346	GO:0005515(protein binding);GO:0005886(plasma membrane);GO:0016020(membrane);GO:0033227(dsRNA transport);GO:0043330(response to exogenous dsRNA);GO:0043330(response to exogenous dsRNA)	NA	raftlin family member 2 [Source:HGNC Symbol;Acc:HGNC:26402]	protein_coding;retained_intron	0.549983	0.575873	0.835883	0.912803	0.0486547	0.0317194	2.45786e-12	3.91819e-10
ENSG00000145337	PYURF	ENST00000273968	GO:0005739(mitochondrion);GO:0005789(endoplasmic reticulum membrane)	NA	PIGY upstream open reading frame [Source:HGNC Symbol;Acc:HGNC:44317]	protein_coding	2.05905	3.3153	3.80693	2.65062	13.5451	23.8456	2.92276e-12	4.61027e-10
ENSG00000091664	SLC17A6	ENST00000263160	GO:0005254(chloride channel activity);GO:0005313(L-glutamate transmembrane transporter activity);GO:0005326(neurotransmitter transmembrane transporter activity);GO:0005436(sodium:phosphate symporter activity);GO:0006811(ion transport);GO:0006814(sodium ion transport);GO:0006820(anion transport);GO:0006836(neurotransmitter transport);GO:0015293(symporter activity);GO:0015386(potassium:proton antip…	04721(Synaptic vesicle cycle);04723(Retrograde endocannabinoid signaling);04724(Glutamatergic synapse);05033(Nicotine addiction)	solute carrier family 17 member 6 [Source:HGNC Symbol;Acc:HGNC:16703]	protein_coding	0	0	0	0	0.374551	0.274231	3.95493e-12	6.1734e-10
ENSG00000139352	ASCL1	ENST00000266744	GO:0000122(negative regulation of transcription by RNA polymerase II);GO:0000785(chromatin);GO:0000977(RNA polymerase II transcription regulatory region sequence-specific DNA binding);GO:0000978(RNA polymerase II cis-regulatory region sequence-specific DNA binding);GO:0000981(DNA-binding transcription factor activity, RNA polymerase II-specific);GO:0001227(DNA-binding transcription repressor acti…	NA	achaete-scute family bHLH transcription factor 1 [Source:HGNC Symbol;Acc:HGNC:738]	protein_coding	70.0015	52.4404	42.1895	34.4259	11.8881	10.6682	4.195e-12	6.48063e-10
ENSG00000138650	PCDH10	ENST00000618019;ENST00000264360;ENST00000511112	GO:0005509(calcium ion binding);GO:0005886(plasma membrane);GO:0005887(integral component of plasma membrane);GO:0007155(cell adhesion);GO:0007156(homophilic cell adhesion via plasma membrane adhesion molecules);GO:0007399(nervous system development);GO:0016020(membrane);GO:0016021(integral component of membrane);GO:0016021(integral component of membrane)	NA	protocadherin 10 [Source:HGNC Symbol;Acc:HGNC:13404]	protein_coding;retained_intron	0.819922	1.13789	0.26304	0.580134	4.26102	2.93016	4.3176e-12	6.60196e-10
ENSG00000115665	SLC5A7	ENST00000264047;ENST00000409059	GO:0001701(in utero embryonic development);GO:0005307(choline:sodium symporter activity);GO:0005886(plasma membrane);GO:0006811(ion transport);GO:0006814(sodium ion transport);GO:0006836(neurotransmitter transport);GO:0007271(synaptic transmission, cholinergic);GO:0007274(neuromuscular synaptic transmission);GO:0008292(acetylcholine biosynthetic process);GO:0015220(choline transmembrane transport…	04725(Cholinergic synapse);05231(Choline metabolism in cancer);05231(Choline metabolism in cancer)	solute carrier family 5 member 7 [Source:HGNC Symbol;Acc:HGNC:14025]	protein_coding	0	0	0	0	0.301217	0.264744	4.37076e-12	6.61575e-10
ENSG00000165644	COMTD1	ENST00000372538;ENST00000491270;ENST00000490521;ENST00000470947;ENST00000460899	GO:0005515(protein binding);GO:0008168(methyltransferase activity);GO:0008171(O-methyltransferase activity);GO:0008757(S-adenosylmethionine-dependent methyltransferase activity);GO:0016020(membrane);GO:0016021(integral component of membrane);GO:0016740(transferase activity);GO:0032259(methylation);GO:0032259(methylation)	NA	catechol-O-methyltransferase domain containing 1 [Source:HGNC Symbol;Acc:HGNC:26309]	protein_coding;processed_transcript	4.53649	3.15992	6.01415	2.29617	0.179256	0.226777	4.86074e-12	7.28382e-10
ENSG00000227036	LINC00511	ENST00000648623;ENST00000650131;ENST00000647652;ENST00000649407;ENST00000649433;ENST00000650227;ENST00000648297;ENST00000650016;ENST00000648631;ENST00000650180;ENST00000649343;ENST00000650313;ENST00000649614;ENST00000650554;ENST00000649793;ENST00000649350;ENST00000647953;ENST00000648954;ENST00000648088;ENST00000581549;ENST00000647706;ENST00000650570;ENST00000650483;ENST00000648428;ENST00000649833…	NA	NA	long intergenic non-protein coding RNA 511 [Source:HGNC Symbol;Acc:HGNC:43564]	lncRNA;retained_intron	0.134246	0.0925385	0.076454	0.0655833	0.588063	0.458603	5.78651e-12	8.58523e-10
ENSG00000115468	EFHD1	ENST00000409613;ENST00000264059;ENST00000410095;ENST00000409708;ENST00000427698;ENST00000442845	GO:0005509(calcium ion binding);GO:0005739(mitochondrion);GO:0005743(mitochondrial inner membrane);GO:0016020(membrane);GO:0031175(neuron projection development);GO:0046872(metal ion binding);GO:0061891(calcium ion sensor activity);GO:1900069(regulation of cellular hyperosmotic salinity response);GO:1900069(regulation of cellular hyperosmotic salinity response)	NA	EF-hand domain family member D1 [Source:HGNC Symbol;Acc:HGNC:29556]	protein_coding;nonsense_mediated_decay	26.2649	25.1484	58.2888	53.9168	12.668	10.7557	7.38035e-12	1.08426e-09
ENSG00000104267	CA2	ENST00000285379;ENST00000520127;ENST00000522742;ENST00000518231;ENST00000520996	GO:0002009(morphogenesis of an epithelium);GO:0004064(arylesterase activity);GO:0004089(carbonate dehydratase activity);GO:0005515(protein binding);GO:0005737(cytoplasm);GO:0005829(cytosol);GO:0005886(plasma membrane);GO:0006730(one-carbon metabolic process);GO:0008270(zinc ion binding);GO:0015670(carbon dioxide transport);GO:0016020(membrane);GO:0016829(lyase activity);GO:0016836(hydro-lyase act…	00910(Nitrogen metabolism);01100(Metabolic pathways);04964(Proximal tubule bicarbonate reclamation);04966(Collecting duct acid secretion);04971(Gastric acid secretion);04972(Pancreatic secretion);04976(Bile secretion);04976(Bile secretion)	carbonic anhydrase 2 [Source:HGNC Symbol;Acc:HGNC:1373]	protein_coding;nonsense_mediated_decay;retained_intron	21.8938	19.044	22.6105	17.4462	64.4833	78.5626	1.23641e-11	1.7988e-09
ENSG00000172020	GAP43	ENST00000305124;ENST00000393780	GO:0001786(phosphatidylserine binding);GO:0005515(protein binding);GO:0005516(calmodulin binding);GO:0005737(cytoplasm);GO:0005886(plasma membrane);GO:0007205(protein kinase C-activating G protein-coupled receptor signaling pathway);GO:0007399(nervous system development);GO:0007411(axon guidance);GO:0009611(response to wounding);GO:0014069(postsynaptic density);GO:0016020(membrane);GO:0016198(axo…	NA	growth associated protein 43 [Source:HGNC Symbol;Acc:HGNC:4140]	protein_coding	0.022367	0	0	0	0.860307	1.0637	1.25987e-11	1.81531e-09
ENSG00000184986	TMEM121	ENST00000392519;ENST00000552019;ENST00000431372	GO:0003674(molecular_function);GO:0005515(protein binding);GO:0005575(cellular_component);GO:0008150(biological_process);GO:0016020(membrane);GO:0016021(integral component of membrane);GO:0016021(integral component of membrane)	NA	transmembrane protein 121 [Source:HGNC Symbol;Acc:HGNC:20511]	protein_coding;processed_transcript	4.29265	3.34015	3.02285	3.11053	0.359348	0.242447	1.34097e-11	1.91376e-09
ENSG00000221869	CEBPD	ENST00000408965	GO:0000785(chromatin);GO:0000976(transcription cis-regulatory region binding);GO:0000978(RNA polymerase II cis-regulatory region sequence-specific DNA binding);GO:0000981(DNA-binding transcription factor activity, RNA polymerase II-specific);GO:0001228(DNA-binding transcription activator activity, RNA polymerase II-specific);GO:0002244(hematopoietic progenitor cell differentiation);GO:0003677(DNA…	NA	CCAAT enhancer binding protein delta [Source:HGNC Symbol;Acc:HGNC:1835]	protein_coding	7.47622	4.28731	5.04623	2.43093	0.273589	0.299558	1.56096e-11	2.20669e-09
ENSG00000180694	TMEM64	ENST00000458549;ENST00000418210;ENST00000422900;ENST00000523902;ENST00000521852;ENST00000521211	GO:0005783(endoplasmic reticulum);GO:0016020(membrane);GO:0016021(integral component of membrane);GO:0030316(osteoclast differentiation);GO:0043462(regulation of ATP-dependent activity);GO:0045600(positive regulation of fat cell differentiation);GO:0045668(negative regulation of osteoblast differentiation);GO:0045672(positive regulation of osteoclast differentiation);GO:0045780(positive regulatio…	NA	transmembrane protein 64 [Source:HGNC Symbol;Acc:HGNC:25441]	protein_coding;processed_transcript	244.824	273.687	91.3889	69.6857	76.7172	69.5041	1.6194e-11	2.26792e-09
ENSG00000092758	COL9A3	ENST00000467819;ENST00000466192;ENST00000469852;ENST00000649368;ENST00000462700;ENST00000466532;ENST00000469802;ENST00000472880	GO:0005201(extracellular matrix structural constituent);GO:0005576(extracellular region);GO:0005581(collagen trimer);GO:0005594(collagen type IX trimer);GO:0005604(basement membrane);GO:0005615(extracellular space);GO:0005788(endoplasmic reticulum lumen);GO:0008584(male gonad development);GO:0008585(female gonad development);GO:0030020(extracellular matrix structural constituent conferring tensil…	04151(PI3K-Akt signaling pathway);04510(Focal adhesion);04512(ECM-receptor interaction);04974(Protein digestion and absorption);05165(Human papillomavirus infection);05165(Human papillomavirus infection)	collagen type IX alpha 3 chain [Source:HGNC Symbol;Acc:HGNC:2219]	processed_transcript;retained_intron;protein_coding	2.74149	1.61512	1.49747	1.14	0.199365	0.147791	2.21633e-11	3.07516e-09
ENSG00000102003	SYP	ENST00000263233;ENST00000691258;ENST00000689634;ENST00000479808;ENST00000494396	GO:0005515(protein binding);GO:0006897(endocytosis);GO:0008021(synaptic vesicle);GO:0015485(cholesterol binding);GO:0016020(membrane);GO:0016021(integral component of membrane);GO:0016188(synaptic vesicle maturation);GO:0030054(cell junction);GO:0030285(integral component of synaptic vesicle membrane);GO:0030672(synaptic vesicle membrane);GO:0031410(cytoplasmic vesicle);GO:0031594(neuromuscular j…	NA	synaptophysin [Source:HGNC Symbol;Acc:HGNC:11506]	protein_coding;retained_intron	0.0165226	0.0152894	0	0	0.228015	0.287613	2.27004e-11	3.12079e-09
ENSG00000171560	FGA	ENST00000403106;ENST00000651975	GO:0002250(adaptive immune response);GO:0002376(immune system process);GO:0005102(signaling receptor binding);GO:0005198(structural molecule activity);GO:0005201(extracellular matrix structural constituent);GO:0005515(protein binding);GO:0005576(extracellular region);GO:0005577(fibrinogen complex);GO:0005615(extracellular space);GO:0005783(endoplasmic reticulum);GO:0005788(endoplasmic reticulum l…	04610(Complement and coagulation cascades);04611(Platelet activation);05171(Coronavirus disease - COVID-19);05171(Coronavirus disease - COVID-19)	fibrinogen alpha chain [Source:HGNC Symbol;Acc:HGNC:3661]	protein_coding	0	0	0	0	0.300953	0.325687	2.38244e-11	3.24554e-09
ENSG00000122679	RAMP3	ENST00000242249	GO:0001540(amyloid-beta binding);GO:0001605(adrenomedullin receptor activity);GO:0001921(positive regulation of receptor recycling);GO:0005515(protein binding);GO:0005764(lysosome);GO:0005886(plasma membrane);GO:0005887(integral component of plasma membrane);GO:0006816(calcium ion transport);GO:0006886(intracellular protein transport);GO:0007186(G protein-coupled receptor signaling pathway);GO:00…	04270(Vascular smooth muscle contraction)	receptor activity modifying protein 3 [Source:HGNC Symbol;Acc:HGNC:9845]	protein_coding	4.17696	3.82667	2.59838	0.994715	15.0852	16.8223	2.46766e-11	3.33135e-09
ENSG00000125968	ID1	ENST00000376112;ENST00000376105	GO:0000122(negative regulation of transcription by RNA polymerase II);GO:0001525(angiogenesis);GO:0005515(protein binding);GO:0005634(nucleus);GO:0005654(nucleoplasm);GO:0005737(cytoplasm);GO:0005794(Golgi apparatus);GO:0005813(centrosome);GO:0007179(transforming growth factor beta receptor signaling pathway);GO:0007420(brain development);GO:0008022(protein C-terminus binding);GO:0010621(negative…	04015(Rap1 signaling pathway);04350(TGF-beta signaling pathway);04390(Hippo signaling pathway);04550(Signaling pathways regulating pluripotency of stem cells);04550(Signaling pathways regulating pluripotency of stem cells)	inhibitor of DNA binding 1, HLH protein [Source:HGNC Symbol;Acc:HGNC:5360]	protein_coding	205.524	141.172	172.446	142.176	21.5855	37.5762	2.52797e-11	3.38229e-09
ENSG00000066382	MPPED2	ENST00000358117;ENST00000448418;ENST00000525519;ENST00000526437;ENST00000524636	GO:0000166(nucleotide binding);GO:0005515(protein binding);GO:0008081(phosphoric diester hydrolase activity);GO:0016208(AMP binding);GO:0016787(hydrolase activity);GO:0019002(GMP binding);GO:0030145(manganese ion binding);GO:0046872(metal ion binding);GO:0046872(metal ion binding)	NA	metallophosphoesterase domain containing 2 [Source:HGNC Symbol;Acc:HGNC:1180]	protein_coding;processed_transcript;nonsense_mediated_decay;retained_intron	0.20542	0.18185	0.158061	0.111888	1.053	1.05094	2.5631e-11	3.39894e-09
ENSG00000103253	HAGHL	ENST00000341413;ENST00000564537;ENST00000567696;ENST00000389703;ENST00000389701;ENST00000549114;ENST00000647875;ENST00000568141;ENST00000562187;ENST00000569143;ENST00000563156;ENST00000569604;ENST00000561546;ENST00000563792;ENST00000561750;ENST00000569385;ENST00000561561;ENST00000567414	GO:0004416(hydroxyacylglutathione hydrolase activity);GO:0005515(protein binding);GO:0016787(hydrolase activity);GO:0019243(methylglyoxal catabolic process to D-lactate via S-lactoyl-glutathione);GO:0046872(metal ion binding);GO:0046872(metal ion binding)	NA	hydroxyacylglutathione hydrolase like [Source:HGNC Symbol;Acc:HGNC:14177]	protein_coding;retained_intron;processed_transcript;nonsense_mediated_decay	7.72052	4.81112	6.57749	4.52328	0.995301	0.911486	2.75546e-11	3.62198e-09
ENSG00000179914	ITLN1	ENST00000326245;ENST00000487531	GO:0001934(positive regulation of protein phosphorylation);GO:0005509(calcium ion binding);GO:0005515(protein binding);GO:0005576(extracellular region);GO:0005615(extracellular space);GO:0005886(plasma membrane);GO:0009624(response to nematode);GO:0016020(membrane);GO:0030246(carbohydrate binding);GO:0031225(anchored component of membrane);GO:0031526(brush border membrane);GO:0042802(identical pr…	NA	intelectin 1 [Source:HGNC Symbol;Acc:HGNC:18259]	protein_coding;processed_transcript	0	0	0	0	0.964692	0.706499	3.30673e-11	4.27167e-09
ENSG00000129538	RNASE1	ENST00000340900;ENST00000397967;ENST00000412779	GO:0003676(nucleic acid binding);GO:0004518(nuclease activity);GO:0004519(endonuclease activity);GO:0004522(ribonuclease A activity);GO:0004540(ribonuclease activity);GO:0005515(protein binding);GO:0005576(extracellular region);GO:0016070(RNA metabolic process);GO:0016787(hydrolase activity);GO:0016829(lyase activity);GO:0070062(extracellular exosome);GO:0090305(nucleic acid phosphodiester bond h…	NA	ribonuclease A family member 1, pancreatic [Source:HGNC Symbol;Acc:HGNC:10044]	protein_coding	0.152857	0.363672	0	0.0976571	3.61208	2.77263	4.17848e-11	5.35167e-09
ENSG00000159713	TPPP3	ENST00000393957;ENST00000561537;ENST00000562206;ENST00000564104;ENST00000290942	GO:0001578(microtubule bundle formation);GO:0005737(cytoplasm);GO:0005856(cytoskeleton);GO:0005874(microtubule);GO:0007566(embryo implantation);GO:0015631(tubulin binding);GO:0032273(positive regulation of protein polymerization);GO:0046697(decidualization);GO:0046785(microtubule polymerization);GO:0048471(perinuclear region of cytoplasm);GO:0097427(microtubule bundle);GO:0097427(microtubule bund…	NA	tubulin polymerization promoting protein family member 3 [Source:HGNC Symbol;Acc:HGNC:24162]	protein_coding;retained_intron	0.209393	0.0497624	0.085678	0.0571728	2.06242	1.30755	4.38835e-11	5.55517e-09
ENSG00000143341	HMCN1	ENST00000271588;ENST00000414277;ENST00000493413	GO:0005201(extracellular matrix structural constituent);GO:0005509(calcium ion binding);GO:0005515(protein binding);GO:0005576(extracellular region);GO:0005604(basement membrane);GO:0005737(cytoplasm);GO:0005912(adherens junction);GO:0005927(muscle tendon junction);GO:0005938(cell cortex);GO:0007049(cell cycle);GO:0007156(homophilic cell adhesion via plasma membrane adhesion molecules);GO:0007157…	NA	hemicentin 1 [Source:HGNC Symbol;Acc:HGNC:19194]	protein_coding;processed_transcript	0.764128	1.15219	0.166012	0.439759	4.01697	2.08325	4.41151e-11	5.55517e-09
ENSG00000188290	HES4	ENST00000481869;ENST00000428771;ENST00000304952;ENST00000484667	GO:0000785(chromatin);GO:0000978(RNA polymerase II cis-regulatory region sequence-specific DNA binding);GO:0000981(DNA-binding transcription factor activity, RNA polymerase II-specific);GO:0003677(DNA binding);GO:0005515(protein binding);GO:0005634(nucleus);GO:0006355(regulation of DNA-templated transcription);GO:0006357(regulation of transcription by RNA polymerase II);GO:0007399(nervous system …	05165(Human papillomavirus infection);05165(Human papillomavirus infection)	hes family bHLH transcription factor 4 [Source:HGNC Symbol;Acc:HGNC:24149]	retained_intron;protein_coding	20.7839	10.8942	25.1037	9.25398	0.467592	1.28816	6.08798e-11	7.60237e-09
ENSG00000167526	RPL13	ENST00000393099;ENST00000311528;ENST00000484610;ENST00000491523;ENST00000399461;ENST00000563749;ENST00000570149;ENST00000565571;ENST00000467736;ENST00000472354;ENST00000487034	GO:0001824(blastocyst development);GO:0002181(cytoplasmic translation);GO:0003723(RNA binding);GO:0003735(structural constituent of ribosome);GO:0005515(protein binding);GO:0005634(nucleus);GO:0005730(nucleolus);GO:0005737(cytoplasm);GO:0005783(endoplasmic reticulum);GO:0005829(cytosol);GO:0005840(ribosome);GO:0006412(translation);GO:0016020(membrane);GO:0022625(cytosolic large ribosomal subunit)…	03010(Ribosome);05171(Coronavirus disease - COVID-19);05171(Coronavirus disease - COVID-19)	ribosomal protein L13 [Source:HGNC Symbol;Acc:HGNC:10303]	protein_coding;retained_intron	807.468	510.629	621.784	434.413	91.5485	155.719	6.22438e-11	7.70846e-09
ENSG00000122550	KLHL7	ENST00000521082;ENST00000322275;ENST00000339077;ENST00000469576;ENST00000469845;ENST00000477076;ENST00000479288;ENST00000409689;ENST00000414163	GO:0005515(protein binding);GO:0005634(nucleus);GO:0005654(nucleoplasm);GO:0005730(nucleolus);GO:0005737(cytoplasm);GO:0005829(cytosol);GO:0005886(plasma membrane);GO:0016567(protein ubiquitination);GO:0031463(Cul3-RING ubiquitin ligase complex);GO:0042802(identical protein binding);GO:0042803(protein homodimerization activity);GO:0048471(perinuclear region of cytoplasm);GO:0048471(perinuclear re…	NA	kelch like family member 7 [Source:HGNC Symbol;Acc:HGNC:15646]	nonsense_mediated_decay;protein_coding;retained_intron;processed_transcript	0.8079	0.805378	0.657818	0.393434	2.81822	3.47865	6.41132e-11	7.87489e-09
ENSG00000188175	HEPACAM2	ENST00000394468;ENST00000492616;ENST00000440868;ENST00000341723	GO:0000139(Golgi membrane);GO:0005515(protein binding);GO:0005654(nucleoplasm);GO:0005737(cytoplasm);GO:0005794(Golgi apparatus);GO:0005813(centrosome);GO:0005815(microtubule organizing center);GO:0005819(spindle);GO:0005856(cytoskeleton);GO:0007049(cell cycle);GO:0007098(centrosome cycle);GO:0016020(membrane);GO:0016021(integral component of membrane);GO:0030496(midbody);GO:0043231(intracellular…	NA	HEPACAM family member 2 [Source:HGNC Symbol;Acc:HGNC:27364]	protein_coding;processed_transcript	0	0	0	0.0634686	1.03358	0.846044	6.69997e-11	8.16253e-09
ENSG00000166206	GABRB3	ENST00000541819;ENST00000557765;ENST00000400188	GO:0004888(transmembrane signaling receptor activity);GO:0004890(GABA-A receptor activity);GO:0005216(ion channel activity);GO:0005230(extracellular ligand-gated ion channel activity);GO:0005254(chloride channel activity);GO:0005886(plasma membrane);GO:0005887(integral component of plasma membrane);GO:0006811(ion transport);GO:0006821(chloride transport);GO:0007165(signal transduction);GO:0007214…	04080(Neuroactive ligand-receptor interaction);04723(Retrograde endocannabinoid signaling);04726(Serotonergic synapse);04727(GABAergic synapse);05032(Morphine addiction);05033(Nicotine addiction);05033(Nicotine addiction)	gamma-aminobutyric acid type A receptor subunit beta3 [Source:HGNC Symbol;Acc:HGNC:4083]	protein_coding;retained_intron	0.00308922	0.00186415	0	0	0.118158	0.0997865	7.06346e-11	8.53596e-09
ENSG00000161179	YDJC	ENST00000292778;ENST00000473985;ENST00000398873;ENST00000464015;ENST00000415762;ENST00000468686;ENST00000482998	GO:0000287(magnesium ion binding);GO:0005975(carbohydrate metabolic process);GO:0016787(hydrolase activity);GO:0019213(deacetylase activity);GO:0046872(metal ion binding);GO:0046872(metal ion binding)	NA	YdjC chitooligosaccharide deacetylase homolog [Source:HGNC Symbol;Acc:HGNC:27158]	protein_coding;retained_intron;nonsense_mediated_decay	18.1893	16.3076	17.6059	12.9416	2.46363	3.45153	9.71465e-11	1.16459e-08
ENSG00000254337	ENSG00000254337	ENST00000522354;ENST00000667126	NA	NA	novel transcript	lncRNA	4.90734	3.56934	3.42053	3.10749	17.5148	18.3503	1.3472e-10	1.6022e-08
ENSG00000131096	PYY	ENST00000692052;ENST00000592796;ENST00000360085	GO:0001664(G protein-coupled receptor binding);GO:0005179(hormone activity);GO:0005184(neuropeptide hormone activity);GO:0005515(protein binding);GO:0005576(extracellular region);GO:0005615(extracellular space);GO:0007218(neuropeptide signaling pathway);GO:0007631(feeding behavior);GO:0031841(neuropeptide Y receptor binding);GO:0060575(intestinal epithelial cell differentiation);GO:0060575(intest…	04080(Neuroactive ligand-receptor interaction);04080(Neuroactive ligand-receptor interaction)	peptide YY [Source:HGNC Symbol;Acc:HGNC:9748]	protein_coding	0.164758	0	0	0	1.95471	2.41784	1.39066e-10	1.64087e-08
ENSG00000162992	NEUROD1	ENST00000295108;ENST00000683166;ENST00000496876	GO:0000785(chromatin);GO:0000978(RNA polymerase II cis-regulatory region sequence-specific DNA binding);GO:0000981(DNA-binding transcription factor activity, RNA polymerase II-specific);GO:0001228(DNA-binding transcription activator activity, RNA polymerase II-specific);GO:0003326(pancreatic A cell fate commitment);GO:0003329(pancreatic PP cell fate commitment);GO:0003677(DNA binding);GO:0003682(…	04950(Maturity onset diabetes of the young);04950(Maturity onset diabetes of the young)	neuronal differentiation 1 [Source:HGNC Symbol;Acc:HGNC:7762]	protein_coding;processed_transcript	0	0	0	0	0.154603	0.130986	1.5091e-10	1.76671e-08
ENSG00000185883	ATP6V0C	ENST00000330398;ENST00000568562;ENST00000564973	GO:0000139(Golgi membrane);GO:0000220(vacuolar proton-transporting V-type ATPase, V0 domain);GO:0005515(protein binding);GO:0005765(lysosomal membrane);GO:0005773(vacuole);GO:0005774(vacuolar membrane);GO:0005886(plasma membrane);GO:0005925(focal adhesion);GO:0006811(ion transport);GO:0007035(vacuolar acidification);GO:0007042(lysosomal lumen acidification);GO:0010008(endosome membrane);GO:001507…	00190(Oxidative phosphorylation);01100(Metabolic pathways);04142(Lysosome);04145(Phagosome);04721(Synaptic vesicle cycle);04966(Collecting duct acid secretion);05110(Vibrio cholerae infection);05120(Epithelial cell signaling in Helicobacter pylori infection);05152(Tuberculosis);05165(Human papillomavirus infection);05323(Rheumatoid arthritis);05323(Rheumatoid arthritis)	ATPase H+ transporting V0 subunit c [Source:HGNC Symbol;Acc:HGNC:855]	protein_coding	144.175	120.481	152.407	121.72	29.6095	35.6708	1.53992e-10	1.78881e-08
ENSG00000128564	VGF	ENST00000249330;ENST00000445482	GO:0001541(ovarian follicle development);GO:0002021(response to dietary excess);GO:0003674(molecular_function);GO:0005179(hormone activity);GO:0005184(neuropeptide hormone activity);GO:0005576(extracellular region);GO:0005615(extracellular space);GO:0005788(endoplasmic reticulum lumen);GO:0005794(Golgi apparatus);GO:0006091(generation of precursor metabolites and energy);GO:0007165(signal transdu…	NA	VGF nerve growth factor inducible [Source:HGNC Symbol;Acc:HGNC:12684]	protein_coding	10.0057	7.32455	8.89353	4.33803	0.853177	1.13756	1.58731e-10	1.82968e-08
ENSG00000277586	NEFL	ENST00000610854;ENST00000615973	GO:0000226(microtubule cytoskeleton organization);GO:0005200(structural constituent of cytoskeleton);GO:0005515(protein binding);GO:0005737(cytoplasm);GO:0005829(cytosol);GO:0005856(cytoskeleton);GO:0005882(intermediate filament);GO:0005883(neurofilament);GO:0007409(axonogenesis);GO:0008022(protein C-terminus binding);GO:0008089(anterograde axonal transport);GO:0008090(retrograde axonal transport…	05014(Amyotrophic lateral sclerosis);05022(Pathways of neurodegeneration - multiple diseases);05022(Pathways of neurodegeneration - multiple diseases)	neurofilament light chain [Source:HGNC Symbol;Acc:HGNC:7739]	protein_coding;retained_intron	0.218582	0.204874	0.117947	0.114624	1.48283	1.14372	1.68686e-10	1.92959e-08
ENSG00000196620	UGT2B15	ENST00000338206	GO:0005783(endoplasmic reticulum);GO:0005789(endoplasmic reticulum membrane);GO:0006629(lipid metabolic process);GO:0006805(xenobiotic metabolic process);GO:0008194(UDP-glycosyltransferase activity);GO:0008202(steroid metabolic process);GO:0008210(estrogen metabolic process);GO:0015020(glucuronosyltransferase activity);GO:0016020(membrane);GO:0016021(integral component of membrane);GO:0016740(tra…	00040(Pentose and glucuronate interconversions);00053(Ascorbate and aldarate metabolism);00140(Steroid hormone biosynthesis);00830(Retinol metabolism);00860(Porphyrin and chlorophyll metabolism);00980(Metabolism of xenobiotics by cytochrome P450);00982(Drug metabolism - cytochrome P450);00983(Drug metabolism - other enzymes);01100(Metabolic pathways);01240(Biosynthesis of cofactors);04976(Bile se…	UDP glucuronosyltransferase family 2 member B15 [Source:HGNC Symbol;Acc:HGNC:12546]	protein_coding	0.846501	1.16062	0.987659	0.884445	6.71453	4.24781	2.74301e-10	3.11394e-08
ENSG00000181195	PENK	ENST00000451791;ENST00000523051;ENST00000518974;ENST00000517415;ENST00000314922	GO:0001515(opioid peptide activity);GO:0001649(osteoblast differentiation);GO:0001662(behavioral fear response);GO:0001666(response to hypoxia);GO:0001964(startle response);GO:0002118(aggressive behavior);GO:0005184(neuropeptide hormone activity);GO:0005576(extracellular region);GO:0005788(endoplasmic reticulum lumen);GO:0005886(plasma membrane);GO:0007165(signal transduction);GO:0007218(neuropep…	04080(Neuroactive ligand-receptor interaction);04080(Neuroactive ligand-receptor interaction)	proenkephalin [Source:HGNC Symbol;Acc:HGNC:8831]	protein_coding	0.0332046	0.0152632	0	0	0.342064	0.620962	3.0688e-10	3.45759e-08
ENSG00000285641	ENSG00000285641	ENST00000648869	NA	NA	novel protein	nonsense_mediated_decay	10.5957	9.4754	15.6919	13.376	1.05572	2.42517	3.23706e-10	3.61995e-08
ENSG00000135919	SERPINE2	ENST00000258405;ENST00000409304;ENST00000409840;ENST00000489065;ENST00000478966;ENST00000473202;ENST00000454956	GO:0004867(serine-type endopeptidase inhibitor activity);GO:0005102(signaling receptor binding);GO:0005515(protein binding);GO:0005539(glycosaminoglycan binding);GO:0005576(extracellular region);GO:0005615(extracellular space);GO:0005829(cytosol);GO:0007399(nervous system development);GO:0007596(blood coagulation);GO:0008201(heparin binding);GO:0008285(negative regulation of cell population proli…	NA	serpin family E member 2 [Source:HGNC Symbol;Acc:HGNC:8951]	protein_coding;retained_intron	1.35312	1.58373	0.702412	0.456564	0.166777	0.176895	3.34985e-10	3.71834e-08
ENSG00000188486	H2AX	ENST00000530167;ENST00000375167	GO:0000077(DNA damage checkpoint signaling);GO:0000724(double-strand break repair via homologous recombination);GO:0000781(chromosome, telomeric region);GO:0000785(chromatin);GO:0000786(nucleosome);GO:0000794(condensed nuclear chromosome);GO:0001673(male germ cell nucleus);GO:0001741(XY body);GO:0003677(DNA binding);GO:0003684(damaged DNA binding);GO:0005515(protein binding);GO:0005634(nucleus);G…	04217(Necroptosis);05034(Alcoholism);05322(Systemic lupus erythematosus);05322(Systemic lupus erythematosus)	H2A.X variant histone [Source:HGNC Symbol;Acc:HGNC:4739]	protein_coding;nonsense_mediated_decay	119.297	125.866	98.6235	85.7265	24.5021	31.3631	3.54588e-10	3.90699e-08
ENSG00000165804	ZNF219	ENST00000421093;ENST00000451119;ENST00000360947;ENST00000554923;ENST00000556101;ENST00000556174;ENST00000624093;ENST00000553296;ENST00000554478;ENST00000556944;ENST00000555697;ENST00000555270;ENST00000553980	GO:0000122(negative regulation of transcription by RNA polymerase II);GO:0000978(RNA polymerase II cis-regulatory region sequence-specific DNA binding);GO:0000981(DNA-binding transcription factor activity, RNA polymerase II-specific);GO:0001227(DNA-binding transcription repressor activity, RNA polymerase II-specific);GO:0001505(regulation of neurotransmitter levels);GO:0003677(DNA binding);GO:000…	NA	zinc finger protein 219 [Source:HGNC Symbol;Acc:HGNC:13011]	protein_coding;processed_transcript;TEC;retained_intron	7.72346	7.76971	4.78148	5.66072	1.76078	1.47196	3.95373e-10	4.32458e-08
ENSG00000256229	ZNF486	ENST00000335117;ENST00000597083	GO:0000978(RNA polymerase II cis-regulatory region sequence-specific DNA binding);GO:0000981(DNA-binding transcription factor activity, RNA polymerase II-specific);GO:0003674(molecular_function);GO:0003677(DNA binding);GO:0005634(nucleus);GO:0006355(regulation of DNA-templated transcription);GO:0006357(regulation of transcription by RNA polymerase II);GO:0008150(biological_process);GO:0046872(met…	05168(Herpes simplex virus 1 infection);05168(Herpes simplex virus 1 infection)	zinc finger protein 486 [Source:HGNC Symbol;Acc:HGNC:20807]	protein_coding	0.0131797	0.0445213	0.147655	0.0988809	0.918406	0.722749	4.76386e-10	5.17293e-08
ENSG00000143320	CRABP2	ENST00000368221;ENST00000368222;ENST00000621784;ENST00000368220	GO:0001972(retinoic acid binding);GO:0002138(retinoic acid biosynthetic process);GO:0005501(retinoid binding);GO:0005504(fatty acid binding);GO:0005515(protein binding);GO:0005634(nucleus);GO:0005654(nucleoplasm);GO:0005737(cytoplasm);GO:0005783(endoplasmic reticulum);GO:0005829(cytosol);GO:0006355(regulation of DNA-templated transcription);GO:0007165(signal transduction);GO:0008289(lipid binding…	NA	cellular retinoic acid binding protein 2 [Source:HGNC Symbol;Acc:HGNC:2339]	protein_coding	134.027	83.5955	84.6942	62.4548	266.872	370.549	5.39748e-10	5.8188e-08
ENSG00000140937	CDH11	ENST00000394156;ENST00000619158;ENST00000569783;ENST00000569095;ENST00000569128;ENST00000268603	GO:0000902(cell morphogenesis);GO:0001501(skeletal system development);GO:0001503(ossification);GO:0005509(calcium ion binding);GO:0005737(cytoplasm);GO:0005886(plasma membrane);GO:0005912(adherens junction);GO:0007043(cell-cell junction assembly);GO:0007155(cell adhesion);GO:0007156(homophilic cell adhesion via plasma membrane adhesion molecules);GO:0016020(membrane);GO:0016021(integral componen…	NA	cadherin 11 [Source:HGNC Symbol;Acc:HGNC:1750]	protein_coding;processed_transcript;retained_intron	0.0975704	0.12505	0.0963036	0.209196	0.938479	0.727483	5.47144e-10	5.8564e-08
ENSG00000002933	TMEM176A	ENST00000475007;ENST00000475536;ENST00000494349;ENST00000484928;ENST00000474166	GO:0005515(protein binding);GO:0016020(membrane);GO:0016021(integral component of membrane);GO:2001199(negative regulation of dendritic cell differentiation);GO:2001199(negative regulation of dendritic cell differentiation)	NA	transmembrane protein 176A [Source:HGNC Symbol;Acc:HGNC:24930]	retained_intron;protein_coding	0	0	0	0	0.314139	0.29461	6.4305e-10	6.83412e-08
ENSG00000145451	GLRA3	ENST00000274093;ENST00000340217;ENST00000483010	GO:0004888(transmembrane signaling receptor activity);GO:0005216(ion channel activity);GO:0005230(extracellular ligand-gated ion channel activity);GO:0005254(chloride channel activity);GO:0005886(plasma membrane);GO:0005887(integral component of plasma membrane);GO:0006811(ion transport);GO:0006821(chloride transport);GO:0007165(signal transduction);GO:0007218(neuropeptide signaling pathway);GO:0…	04080(Neuroactive ligand-receptor interaction);04080(Neuroactive ligand-receptor interaction)	glycine receptor alpha 3 [Source:HGNC Symbol;Acc:HGNC:4328]	protein_coding;processed_transcript	2.09335	1.7965	2.37383	1.77322	6.80546	6.51629	7.67194e-10	8.09606e-08
ENSG00000160113	NR2F6	ENST00000291442	GO:0000122(negative regulation of transcription by RNA polymerase II);GO:0000785(chromatin);GO:0000978(RNA polymerase II cis-regulatory region sequence-specific DNA binding);GO:0000981(DNA-binding transcription factor activity, RNA polymerase II-specific);GO:0001227(DNA-binding transcription repressor activity, RNA polymerase II-specific);GO:0003677(DNA binding);GO:0003700(DNA-binding transcripti…	NA	nuclear receptor subfamily 2 group F member 6 [Source:HGNC Symbol;Acc:HGNC:7977]	protein_coding	13.8342	10.8282	10.586	8.77681	1.73716	2.68513	8.79652e-10	9.21789e-08
ENSG00000178531	CTXN1	ENST00000318978	GO:0016020(membrane);GO:0016021(integral component of membrane)	NA	cortexin 1 [Source:HGNC Symbol;Acc:HGNC:31108]	protein_coding	18.0309	14.0846	14.8853	13.0532	0.947972	2.59871	1.07651e-09	1.12024e-07
ENSG00000171557	FGG	ENST00000404648;ENST00000336098;ENST00000473393;ENST00000465913;ENST00000484695;ENST00000393846;ENST00000464532	GO:0005102(signaling receptor binding);GO:0005198(structural molecule activity);GO:0005201(extracellular matrix structural constituent);GO:0005515(protein binding);GO:0005576(extracellular region);GO:0005577(fibrinogen complex);GO:0005615(extracellular space);GO:0005737(cytoplasm);GO:0005788(endoplasmic reticulum lumen);GO:0005886(plasma membrane);GO:0007160(cell-matrix adhesion);GO:0007596(blood…	04610(Complement and coagulation cascades);04611(Platelet activation);05150(Staphylococcus aureus infection);05171(Coronavirus disease - COVID-19);05171(Coronavirus disease - COVID-19)	fibrinogen gamma chain [Source:HGNC Symbol;Acc:HGNC:3694]	protein_coding;retained_intron	0.0468243	0	0	0.0293787	1.10039	0.838741	1.09363e-09	1.13021e-07
ENSG00000149243	KLHL35	ENST00000376292;ENST00000460787;ENST00000527491;ENST00000539798;ENST00000624466	GO:0005515(protein binding);GO:0005515(protein binding)	NA	kelch like family member 35 [Source:HGNC Symbol;Acc:HGNC:26597]	protein_coding;retained_intron;TEC	2.35071	1.29855	1.2663	0.968836	0.0776873	0.187476	1.14186e-09	1.164e-07
ENSG00000132821	VSTM2L	ENST00000373461;ENST00000373459	GO:0005515(protein binding);GO:0005576(extracellular region);GO:0005737(cytoplasm);GO:0005886(plasma membrane);GO:0007156(homophilic cell adhesion via plasma membrane adhesion molecules);GO:0007411(axon guidance);GO:0030424(axon);GO:0043524(negative regulation of neuron apoptotic process);GO:0070593(dendrite self-avoidance);GO:0098632(cell-cell adhesion mediator activity);GO:0098632(cell-cell adh…	NA	V-set and transmembrane domain containing 2 like [Source:HGNC Symbol;Acc:HGNC:16096]	protein_coding	0	0	0.0310028	0.0406362	0.878877	0.546216	1.23952e-09	1.24559e-07
ENSG00000157856	DRC1	ENST00000288710;ENST00000483675	GO:0003352(regulation of cilium movement);GO:0005737(cytoplasm);GO:0005829(cytosol);GO:0005856(cytoskeleton);GO:0005858(axonemal dynein complex);GO:0005929(cilium);GO:0005930(axoneme);GO:0007368(determination of left/right symmetry);GO:0007507(heart development);GO:0031514(motile cilium);GO:0042995(cell projection);GO:0060285(cilium-dependent cell motility);GO:0070286(axonemal dynein complex asse…	NA	dynein regulatory complex subunit 1 [Source:HGNC Symbol;Acc:HGNC:24245]	protein_coding;retained_intron	0	0	0	0	0.361153	0.306182	1.24684e-09	1.24559e-07
ENSG00000141933	TPGS1	ENST00000359315;ENST00000588278	GO:0005737(cytoplasm);GO:0005813(centrosome);GO:0005815(microtubule organizing center);GO:0005856(cytoskeleton);GO:0005874(microtubule);GO:0005929(cilium);GO:0007268(chemical synaptic transmission);GO:0007283(spermatogenesis);GO:0007288(sperm axoneme assembly);GO:0008017(microtubule binding);GO:0015631(tubulin binding);GO:0018095(protein polyglutamylation);GO:0030154(cell differentiation);GO:0030…	NA	tubulin polyglutamylase complex subunit 1 [Source:HGNC Symbol;Acc:HGNC:25058]	protein_coding;retained_intron	1.22119	0.965512	1.53988	0.882693	0.106247	0.0407273	1.41844e-09	1.40763e-07
ENSG00000250479	CHCHD10	ENST00000484558;ENST00000401675;ENST00000523865;ENST00000520222	GO:0003674(molecular_function);GO:0005515(protein binding);GO:0005634(nucleus);GO:0005739(mitochondrion);GO:0005758(mitochondrial intermembrane space);GO:0006119(oxidative phosphorylation);GO:0007005(mitochondrion organization);GO:0030322(stabilization of membrane potential);GO:0031930(mitochondria-nucleus signaling pathway);GO:0051457(maintenance of protein location in nucleus);GO:0061617(MICOS …	05014(Amyotrophic lateral sclerosis);05014(Amyotrophic lateral sclerosis)	coiled-coil-helix-coiled-coil-helix domain containing 10 [Source:HGNC Symbol;Acc:HGNC:15559]	protein_coding;retained_intron	13.3051	11.1126	10.3333	9.60829	0.808987	1.80975	1.46197e-09	1.44129e-07
ENSG00000004948	CALCR	ENST00000649521;ENST00000426151;ENST00000423724	GO:0001503(ossification);GO:0001540(amyloid-beta binding);GO:0001635(calcitonin gene-related peptide receptor activity);GO:0001669(acrosomal vesicle);GO:0004888(transmembrane signaling receptor activity);GO:0004930(G protein-coupled receptor activity);GO:0004948(calcitonin receptor activity);GO:0005515(protein binding);GO:0005886(plasma membrane);GO:0005887(integral component of plasma membrane);…	04080(Neuroactive ligand-receptor interaction);04380(Osteoclast differentiation);04380(Osteoclast differentiation)	calcitonin receptor [Source:HGNC Symbol;Acc:HGNC:1440]	protein_coding;nonsense_mediated_decay	16.8819	18.3142	6.65016	5.61497	5.22339	3.60831	1.52982e-09	1.49832e-07
ENSG00000197937	ZNF347	ENST00000334197;ENST00000595710;ENST00000452676	GO:0000978(RNA polymerase II cis-regulatory region sequence-specific DNA binding);GO:0000981(DNA-binding transcription factor activity, RNA polymerase II-specific);GO:0003677(DNA binding);GO:0005634(nucleus);GO:0006355(regulation of DNA-templated transcription);GO:0006357(regulation of transcription by RNA polymerase II);GO:0046872(metal ion binding);GO:0046872(metal ion binding)	05168(Herpes simplex virus 1 infection);05168(Herpes simplex virus 1 infection)	zinc finger protein 347 [Source:HGNC Symbol;Acc:HGNC:16447]	protein_coding;retained_intron	0.0123322	0	0	0.0160493	0.359804	0.372962	1.63194e-09	1.58796e-07
ENSG00000279569	ENSG00000279569	ENST00000623414	NA	NA	novel transcript	TEC	0.550347	1.83531	6.2009	2.59319	0.242017	0.310878	1.68146e-09	1.62559e-07
ENSG00000178372	CALML5	ENST00000380332	GO:0005509(calcium ion binding);GO:0005576(extracellular region);GO:0007165(signal transduction);GO:0008544(epidermis development);GO:0030234(enzyme regulator activity);GO:0046872(metal ion binding);GO:0050790(regulation of catalytic activity);GO:1904813(ficolin-1-rich granule lumen)	04014(Ras signaling pathway);04015(Rap1 signaling pathway);04020(Calcium signaling pathway);04022(cGMP-PKG signaling pathway);04024(cAMP signaling pathway);04070(Phosphatidylinositol signaling system);04114(Oocyte meiosis);04218(Cellular senescence);04261(Adrenergic signaling in cardiomyocytes);04270(Vascular smooth muscle contraction);04371(Apelin signaling pathway);04625(C-type lectin receptor …	calmodulin like 5 [Source:HGNC Symbol;Acc:HGNC:18180]	protein_coding	44.0492	21.9703	22.4138	16.5626	3.97641	5.0681	1.78633e-09	1.71105e-07
ENSG00000261221	ZNF865	ENST00000568956	GO:0000978(RNA polymerase II cis-regulatory region sequence-specific DNA binding);GO:0003677(DNA binding);GO:0003700(DNA-binding transcription factor activity);GO:0005634(nucleus);GO:0006357(regulation of transcription by RNA polymerase II);GO:0046872(metal ion binding)	NA	zinc finger protein 865 [Source:HGNC Symbol;Acc:HGNC:38705]	protein_coding	4.16644	4.78521	3.93908	5.15373	0.819965	0.863635	1.79269e-09	1.71105e-07
ENSG00000169429	CXCL8	ENST00000307407;ENST00000696131;ENST00000483500;ENST00000401931	GO:0001525(angiogenesis);GO:0002237(response to molecule of bacterial origin);GO:0005125(cytokine activity);GO:0005153(interleukin-8 receptor binding);GO:0005515(protein binding);GO:0005576(extracellular region);GO:0005615(extracellular space);GO:0006935(chemotaxis);GO:0006952(defense response);GO:0006954(inflammatory response);GO:0006955(immune response);GO:0007165(signal transduction);GO:000718…	04060(Cytokine-cytokine receptor interaction);04061(Viral protein interaction with cytokine and cytokine receptor);04062(Chemokine signaling pathway);04064(NF-kappa B signaling pathway);04072(Phospholipase D signaling pathway);04218(Cellular senescence);04620(Toll-like receptor signaling pathway);04621(NOD-like receptor signaling pathway);04622(RIG-I-like receptor signaling pathway);04657(IL-17 s…	C-X-C motif chemokine ligand 8 [Source:HGNC Symbol;Acc:HGNC:6025]	protein_coding;nonsense_mediated_decay;retained_intron	2.53571	2.80497	2.41997	0.592361	0.0689824	0.133072	1.97918e-09	1.87709e-07
ENSG00000137959	IFI44L	ENST00000370751;ENST00000459784;ENST00000462041;ENST00000679651;ENST00000680295;ENST00000680621;ENST00000474002;ENST00000494910;ENST00000679998;ENST00000452835	GO:0003674(molecular_function);GO:0005525(GTP binding);GO:0005575(cellular_component);GO:0005737(cytoplasm);GO:0006955(immune response);GO:0051607(defense response to virus);GO:0051607(defense response to virus)	NA	interferon induced protein 44 like [Source:HGNC Symbol;Acc:HGNC:17817]	protein_coding;processed_transcript;retained_intron	0.106241	0.0660821	0.192228	0.0763161	0	0	2.13636e-09	2.01342e-07
ENSG00000138696	BMPR1B	ENST00000515059;ENST00000394931;ENST00000440890;ENST00000506363;ENST00000264568;ENST00000502683	GO:0000166(nucleotide binding);GO:0001502(cartilage condensation);GO:0001550(ovarian cumulus expansion);GO:0001649(osteoblast differentiation);GO:0001654(eye development);GO:0002062(chondrocyte differentiation);GO:0002063(chondrocyte development);GO:0004672(protein kinase activity);GO:0004674(protein serine/threonine kinase activity);GO:0004675(transmembrane receptor protein serine/threonine kina…	04060(Cytokine-cytokine receptor interaction);04350(TGF-beta signaling pathway);04360(Axon guidance);04390(Hippo signaling pathway);04550(Signaling pathways regulating pluripotency of stem cells);05418(Fluid shear stress and atherosclerosis);05418(Fluid shear stress and atherosclerosis)	bone morphogenetic protein receptor type 1B [Source:HGNC Symbol;Acc:HGNC:1077]	protein_coding;processed_transcript	0.93564	0.942713	3.49212	2.7219	4.36864	4.42219	2.83526e-09	2.6554e-07
ENSG00000250302	LINC01618	ENST00000650700;ENST00000653034	NA	NA	long intergenic non-protein coding RNA 1618 [Source:HGNC Symbol;Acc:HGNC:27195]	lncRNA	0.0127222	0	0.0247559	0.0200184	0.35709	0.455026	3.30801e-09	3.07891e-07
ENSG00000165507	DEPP1	ENST00000298295	GO:0005737(cytoplasm);GO:0005739(mitochondrion);GO:0005777(peroxisome);GO:0006914(autophagy);GO:0010506(regulation of autophagy);GO:0043231(intracellular membrane-bounded organelle)	NA	DEPP1 autophagy regulator [Source:HGNC Symbol;Acc:HGNC:23355]	protein_coding	0.0911579	0.198462	0.0409034	0.0525396	1.0708	0.986717	3.45931e-09	3.19986e-07
ENSG00000164692	COL1A2	ENST00000297268;ENST00000467931;ENST00000497316;ENST00000469732;ENST00000481570;ENST00000478215;ENST00000473573;ENST00000461525;ENST00000464916;ENST00000488298;ENST00000488121	GO:0001501(skeletal system development);GO:0001568(blood vessel development);GO:0002020(protease binding);GO:0005201(extracellular matrix structural constituent);GO:0005515(protein binding);GO:0005576(extracellular region);GO:0005581(collagen trimer);GO:0005584(collagen type I trimer);GO:0005615(extracellular space);GO:0005783(endoplasmic reticulum);GO:0005788(endoplasmic reticulum lumen);GO:0007…	04151(PI3K-Akt signaling pathway);04510(Focal adhesion);04512(ECM-receptor interaction);04611(Platelet activation);04926(Relaxin signaling pathway);04933(AGE-RAGE signaling pathway in diabetic complications);04974(Protein digestion and absorption);05146(Amoebiasis);05165(Human papillomavirus infection);05205(Proteoglycans in cancer);05205(Proteoglycans in cancer)	collagen type I alpha 2 chain [Source:HGNC Symbol;Acc:HGNC:2198]	protein_coding;retained_intron	0.40398	0.401147	0.398649	0.345554	0.0336402	0.00472035	3.84418e-09	3.53405e-07
ENSG00000128567	PODXL	ENST00000446198;ENST00000378555;ENST00000322985;ENST00000490761;ENST00000487965;ENST00000482581;ENST00000484346	GO:0001726(ruffle);GO:0005515(protein binding);GO:0005615(extracellular space);GO:0005730(nucleolus);GO:0005737(cytoplasm);GO:0005886(plasma membrane);GO:0005887(integral component of plasma membrane);GO:0005902(microvillus);GO:0007155(cell adhesion);GO:0007162(negative regulation of cell adhesion);GO:0016020(membrane);GO:0016021(integral component of membrane);GO:0016324(apical plasma membrane);…	05132(Salmonella infection);05132(Salmonella infection)	podocalyxin like [Source:HGNC Symbol;Acc:HGNC:9171]	nonsense_mediated_decay;protein_coding;retained_intron	57.0045	67.1171	27.9671	36.8159	16.5912	10.7182	4.08968e-09	3.73682e-07
ENSG00000128815	WDFY4	ENST00000325239;ENST00000374161;ENST00000497480;ENST00000465910	GO:0005515(protein binding);GO:0005768(endosome);GO:0005769(early endosome);GO:0005783(endoplasmic reticulum);GO:0006914(autophagy);GO:0019882(antigen processing and presentation);GO:0036037(CD8-positive, alpha-beta T cell activation);GO:0098586(cellular response to virus);GO:0098586(cellular response to virus)	NA	WDFY family member 4 [Source:HGNC Symbol;Acc:HGNC:29323]	protein_coding;processed_transcript;retained_intron	0.0575037	0.0887026	0.64321	1.23622	0.0409831	0	4.15671e-09	3.77505e-07
ENSG00000197766	CFD	ENST00000327726;ENST00000695944;ENST00000695946	GO:0002376(immune system process);GO:0004252(serine-type endopeptidase activity);GO:0005576(extracellular region);GO:0005615(extracellular space);GO:0006508(proteolysis);GO:0006956(complement activation);GO:0006957(complement activation, alternative pathway);GO:0007219(Notch signaling pathway);GO:0008233(peptidase activity);GO:0008236(serine-type peptidase activity);GO:0009617(response to bacteri…	04610(Complement and coagulation cascades);05150(Staphylococcus aureus infection);05171(Coronavirus disease - COVID-19);05171(Coronavirus disease - COVID-19)	complement factor D [Source:HGNC Symbol;Acc:HGNC:2771]	protein_coding	1.34298	1.30048	1.38715	1.20507	0.0902802	0.0381391	5.80865e-09	5.24353e-07
ENSG00000197982	C1orf122	ENST00000373042;ENST00000468084;ENST00000373043	NA	NA	chromosome 1 open reading frame 122 [Source:HGNC Symbol;Acc:HGNC:24789]	protein_coding	12.1811	7.92995	8.39811	4.97988	0.969725	1.66719	6.2072e-09	5.56976e-07
ENSG00000168140	VASN	ENST00000304735	GO:0005515(protein binding);GO:0005576(extracellular region);GO:0005615(extracellular space);GO:0005739(mitochondrion);GO:0005765(lysosomal membrane);GO:0005886(plasma membrane);GO:0009986(cell surface);GO:0010719(negative regulation of epithelial to mesenchymal transition);GO:0016020(membrane);GO:0016021(integral component of membrane);GO:0030512(negative regulation of transforming growth factor…	NA	vasorin [Source:HGNC Symbol;Acc:HGNC:18517]	protein_coding	10.8059	8.56663	8.63216	6.75443	1.3143	2.16739	7.27982e-09	6.49334e-07
ENSG00000130881	LRP3	ENST00000590278;ENST00000253193;ENST00000590275	GO:0005515(protein binding);GO:0005886(plasma membrane);GO:0005905(clathrin-coated pit);GO:0006897(endocytosis);GO:0006898(receptor-mediated endocytosis);GO:0010628(positive regulation of gene expression);GO:0010629(negative regulation of gene expression);GO:0016020(membrane);GO:0016021(integral component of membrane);GO:0045599(negative regulation of fat cell differentiation);GO:0045669(positive…	NA	LDL receptor related protein 3 [Source:HGNC Symbol;Acc:HGNC:6695]	retained_intron;protein_coding	8.93881	8.76664	6.73966	6.2135	2.23134	2.11185	7.55014e-09	6.6946e-07
ENSG00000011677	GABRA3	ENST00000370314;ENST00000497894	GO:0004888(transmembrane signaling receptor activity);GO:0004890(GABA-A receptor activity);GO:0005216(ion channel activity);GO:0005230(extracellular ligand-gated ion channel activity);GO:0005237(inhibitory extracellular ligand-gated ion channel activity);GO:0005254(chloride channel activity);GO:0005515(protein binding);GO:0005886(plasma membrane);GO:0005887(integral component of plasma membrane);…	04080(Neuroactive ligand-receptor interaction);04723(Retrograde endocannabinoid signaling);04727(GABAergic synapse);04742(Taste transduction);05032(Morphine addiction);05033(Nicotine addiction);05033(Nicotine addiction)	gamma-aminobutyric acid type A receptor subunit alpha3 [Source:HGNC Symbol;Acc:HGNC:4077]	protein_coding;processed_transcript	0.390431	0.213171	1.04698	1.23632	0.09814	0.06277	8.51651e-09	7.50705e-07
ENSG00000081665	ZNF506	ENST00000591639;ENST00000587822;ENST00000540806;ENST00000545006;ENST00000590766;ENST00000587461	GO:0000978(RNA polymerase II cis-regulatory region sequence-specific DNA binding);GO:0000981(DNA-binding transcription factor activity, RNA polymerase II-specific);GO:0003677(DNA binding);GO:0005634(nucleus);GO:0005730(nucleolus);GO:0006355(regulation of DNA-templated transcription);GO:0006357(regulation of transcription by RNA polymerase II);GO:0046872(metal ion binding);GO:0046872(metal ion bin…	05168(Herpes simplex virus 1 infection);05168(Herpes simplex virus 1 infection)	zinc finger protein 506 [Source:HGNC Symbol;Acc:HGNC:23780]	nonsense_mediated_decay;retained_intron;protein_coding	0.295	0.297803	0.0681829	0.116216	1.16329	0.593655	9.81526e-09	8.55126e-07
ENSG00000187796	CARD9	ENST00000371732;ENST00000695906;ENST00000485975;ENST00000641290;ENST00000556340;ENST00000489932;ENST00000460290;ENST00000695905	GO:0001819(positive regulation of cytokine production);GO:0002250(adaptive immune response);GO:0002376(immune system process);GO:0002446(neutrophil mediated immunity);GO:0005515(protein binding);GO:0005737(cytoplasm);GO:0005829(cytosol);GO:0005886(plasma membrane);GO:0007249(I-kappaB kinase/NF-kappaB signaling);GO:0007254(JNK cascade);GO:0009410(response to xenobiotic stimulus);GO:0009620(respons…	04621(NOD-like receptor signaling pathway);04625(C-type lectin receptor signaling pathway);05152(Tuberculosis);05168(Herpes simplex virus 1 infection);05168(Herpes simplex virus 1 infection)	caspase recruitment domain family member 9 [Source:HGNC Symbol;Acc:HGNC:16391]	protein_coding;retained_intron;nonsense_mediated_decay	2.27238	0.599594	2.55676	1.34546	0.132003	0.109697	9.7721e-09	8.55126e-07
ENSG00000161996	WDR90	ENST00000549091;ENST00000549024;ENST00000553080;ENST00000552683;ENST00000548448;ENST00000549648;ENST00000552943;ENST00000548603;ENST00000293879;ENST00000550739;ENST00000315764;ENST00000552728;ENST00000546516;ENST00000550902;ENST00000552648;ENST00000547543;ENST00000548859;ENST00000546923;ENST00000547944;ENST00000547407;ENST00000550593	GO:0005515(protein binding);GO:0005737(cytoplasm);GO:0005814(centriole);GO:0005856(cytoskeleton);GO:0030030(cell projection organization);GO:0060271(cilium assembly);GO:0060271(cilium assembly)	NA	WD repeat domain 90 [Source:HGNC Symbol;Acc:HGNC:26960]	protein_coding;retained_intron;processed_transcript;nonsense_mediated_decay	0.191399	0.249173	0.320687	0.560744	1.41165	1.27913	1.42657e-08	1.23567e-06
ENSG00000128510	CPA4	ENST00000222482;ENST00000490117;ENST00000474254;ENST00000488025	GO:0004180(carboxypeptidase activity);GO:0004181(metallocarboxypeptidase activity);GO:0005515(protein binding);GO:0005575(cellular_component);GO:0005576(extracellular region);GO:0005615(extracellular space);GO:0006508(proteolysis);GO:0008233(peptidase activity);GO:0008237(metallopeptidase activity);GO:0008270(zinc ion binding);GO:0016573(histone acetylation);GO:0016787(hydrolase activity);GO:0046…	NA	carboxypeptidase A4 [Source:HGNC Symbol;Acc:HGNC:15740]	protein_coding;retained_intron	0.734352	0.91336	0.560246	0.350381	0.0374225	0	1.49529e-08	1.28638e-06
ENSG00000176945	MUC20	ENST00000447234;ENST00000436408;ENST00000445522;ENST00000498018	GO:0005576(extracellular region);GO:0005796(Golgi lumen);GO:0005886(plasma membrane);GO:0009925(basal plasma membrane);GO:0016020(membrane);GO:0016323(basolateral plasma membrane);GO:0016324(apical plasma membrane);GO:0031528(microvillus membrane);GO:0042802(identical protein binding);GO:0042995(cell projection);GO:0048012(hepatocyte growth factor receptor signaling pathway);GO:0048012(hepatocyte…	NA	mucin 20, cell surface associated [Source:HGNC Symbol;Acc:HGNC:23282]	protein_coding;retained_intron	2.95972	2.08629	0.95639	1.0064	0.433051	0.455405	1.50228e-08	1.28638e-06
ENSG00000155980	KIF5A	ENST00000674619;ENST00000675882;ENST00000676437;ENST00000552227	GO:0000166(nucleotide binding);GO:0003774(cytoskeletal motor activity);GO:0003777(microtubule motor activity);GO:0005515(protein binding);GO:0005524(ATP binding);GO:0005737(cytoplasm);GO:0005829(cytosol);GO:0005856(cytoskeleton);GO:0005871(kinesin complex);GO:0005874(microtubule);GO:0007018(microtubule-based movement);GO:0007268(chemical synaptic transmission);GO:0007411(axon guidance);GO:0008017…	04144(Endocytosis);04728(Dopaminergic synapse);05010(Alzheimer disease);05012(Parkinson disease);05014(Amyotrophic lateral sclerosis);05016(Huntington disease);05020(Prion disease);05022(Pathways of neurodegeneration - multiple diseases);05132(Salmonella infection);05223(Non-small cell lung cancer);05223(Non-small cell lung cancer)	kinesin family member 5A [Source:HGNC Symbol;Acc:HGNC:6323]	protein_coding;retained_intron	0	0	0.00497549	0	0.108742	0.0866688	1.64074e-08	1.39008e-06
ENSG00000002726	AOC1	ENST00000493429;ENST00000360937	GO:0005507(copper ion binding);GO:0005509(calcium ion binding);GO:0005515(protein binding);GO:0005576(extracellular region);GO:0005615(extracellular space);GO:0005777(peroxisome);GO:0005886(plasma membrane);GO:0005923(bicellular tight junction);GO:0008131(primary amine oxidase activity);GO:0008201(heparin binding);GO:0008270(zinc ion binding);GO:0009308(amine metabolic process);GO:0009445(putresc…	00330(Arginine and proline metabolism);00340(Histidine metabolism);00380(Tryptophan metabolism);01100(Metabolic pathways);01100(Metabolic pathways)	amine oxidase copper containing 1 [Source:HGNC Symbol;Acc:HGNC:80]	protein_coding	0.0594979	0	0	0	0.590402	0.471694	2.34596e-08	1.97496e-06
ENSG00000169255	B3GALNT1	ENST00000651178;ENST00000652377;ENST00000651379;ENST00000652111;ENST00000651916;ENST00000651117;ENST00000650695;ENST00000652134;ENST00000651953;ENST00000392781;ENST00000651460;ENST00000651686;ENST00000651305;ENST00000651689;ENST00000651422;ENST00000392779;ENST00000651292;ENST00000488170;ENST00000652593;ENST00000478383;ENST00000652309;ENST00000651801;ENST00000484127;ENST00000652143;ENST00000652669…	GO:0000139(Golgi membrane);GO:0005794(Golgi apparatus);GO:0006486(protein glycosylation);GO:0006629(lipid metabolic process);GO:0006687(glycosphingolipid metabolic process);GO:0008194(UDP-glycosyltransferase activity);GO:0008499(UDP-galactose:beta-N-acetylglucosamine beta-1,3-galactosyltransferase activity);GO:0009312(oligosaccharide biosynthetic process);GO:0016020(membrane);GO:0016021(integral …	00601(Glycosphingolipid biosynthesis - lacto and neolacto series);00603(Glycosphingolipid biosynthesis - globo and isoglobo series);01100(Metabolic pathways);01100(Metabolic pathways)	beta-1,3-N-acetylgalactosaminyltransferase 1 (globoside blood group) [Source:HGNC Symbol;Acc:HGNC:918]	protein_coding;retained_intron;processed_transcript	8.76522	9.07009	12.4983	10.0992	26.5508	27.9293	2.38293e-08	1.98379e-06
ENSG00000127564	PKMYT1	ENST00000431515;ENST00000440027;ENST00000262300;ENST00000575981;ENST00000573944;ENST00000382240;ENST00000574385;ENST00000575632;ENST00000576268;ENST00000571102;ENST00000572059;ENST00000575040;ENST00000572658;ENST00000574730;ENST00000574680;ENST00000572832;ENST00000570649;ENST00000574333;ENST00000574415	GO:0000079(regulation of cyclin-dependent protein serine/threonine kinase activity);GO:0000086(G2/M transition of mitotic cell cycle);GO:0000139(Golgi membrane);GO:0000166(nucleotide binding);GO:0000278(mitotic cell cycle);GO:0004672(protein kinase activity);GO:0004674(protein serine/threonine kinase activity);GO:0004712(protein serine/threonine/tyrosine kinase activity);GO:0005515(protein bindin…	04110(Cell cycle);04114(Oocyte meiosis);04914(Progesterone-mediated oocyte maturation);04914(Progesterone-mediated oocyte maturation)	protein kinase, membrane associated tyrosine/threonine 1 [Source:HGNC Symbol;Acc:HGNC:29650]	protein_coding;retained_intron;nonsense_mediated_decay;processed_transcript	18.5764	13.8342	27.8529	18.3516	5.60906	5.36742	2.37565e-08	1.98379e-06
ENSG00000168843	FSTL5	ENST00000306100	GO:0005509(calcium ion binding);GO:0005515(protein binding);GO:0005576(extracellular region);GO:0030154(cell differentiation);GO:0046872(metal ion binding)	NA	follistatin like 5 [Source:HGNC Symbol;Acc:HGNC:21386]	protein_coding	0	0	0.0201605	0	0.199462	0.358223	2.4093e-08	1.99313e-06
ENSG00000144485	HES6	ENST00000272937;ENST00000409160;ENST00000409574;ENST00000450098;ENST00000409182;ENST00000417803;ENST00000409356;ENST00000436051	GO:0000122(negative regulation of transcription by RNA polymerase II);GO:0000785(chromatin);GO:0000977(RNA polymerase II transcription regulatory region sequence-specific DNA binding);GO:0000978(RNA polymerase II cis-regulatory region sequence-specific DNA binding);GO:0000981(DNA-binding transcription factor activity, RNA polymerase II-specific);GO:0001227(DNA-binding transcription repressor acti…	05165(Human papillomavirus infection);05165(Human papillomavirus infection)	hes family bHLH transcription factor 6 [Source:HGNC Symbol;Acc:HGNC:18254]	protein_coding	10.36	8.87044	11.4157	9.54068	1.87731	2.51962	2.42075e-08	1.99313e-06
ENSG00000129654	FOXJ1	ENST00000322957	GO:0000122(negative regulation of transcription by RNA polymerase II);GO:0000785(chromatin);GO:0000976(transcription cis-regulatory region binding);GO:0000978(RNA polymerase II cis-regulatory region sequence-specific DNA binding);GO:0000981(DNA-binding transcription factor activity, RNA polymerase II-specific);GO:0001228(DNA-binding transcription activator activity, RNA polymerase II-specific);GO…	NA	forkhead box J1 [Source:HGNC Symbol;Acc:HGNC:3816]	protein_coding	0	0.020013	0	0	0.430103	0.444075	2.44909e-08	2.00545e-06
ENSG00000233725	NRAD1	ENST00000423211;ENST00000613822;ENST00000592085;ENST00000587571;ENST00000591799;ENST00000439707	NA	NA	non-coding RNA in the aldehyde dehydrogenase 1A pathway [Source:HGNC Symbol;Acc:HGNC:26981]	lncRNA	0.0457426	0.01835	0	0.00471128	0.320866	0.288742	2.46356e-08	2.00633e-06
ENSG00000131650	KREMEN2	ENST00000575769;ENST00000319500;ENST00000571007;ENST00000303746;ENST00000572045;ENST00000575885	GO:0005886(plasma membrane);GO:0016020(membrane);GO:0016021(integral component of membrane);GO:0016055(Wnt signaling pathway);GO:0030279(negative regulation of ossification);GO:0031901(early endosome membrane);GO:0060173(limb development);GO:0060173(limb development)	NA	kringle containing transmembrane protein 2 [Source:HGNC Symbol;Acc:HGNC:18797]	protein_coding	9.38995	6.87796	10.6028	6.98933	1.80231	1.74724	2.60067e-08	2.10654e-06
ENSG00000288649	ACTL10	ENST00000677665	GO:0005869(dynactin complex)	NA	actin like 10 [Source:HGNC Symbol;Acc:HGNC:16127]	protein_coding	3.07174	2.12038	2.2904	0.70993	0.096374	0.129768	2.64644e-08	2.13209e-06
ENSG00000135052	GOLM1	ENST00000388712;ENST00000388711;ENST00000464314	GO:0005515(protein binding);GO:0005615(extracellular space);GO:0005788(endoplasmic reticulum lumen);GO:0005794(Golgi apparatus);GO:0005887(integral component of plasma membrane);GO:0006997(nucleus organization);GO:0016020(membrane);GO:0016021(integral component of membrane);GO:0019216(regulation of lipid metabolic process);GO:0019216(regulation of lipid metabolic process)	NA	golgi membrane protein 1 [Source:HGNC Symbol;Acc:HGNC:15451]	protein_coding;retained_intron	2.35889	2.65433	6.46842	7.06762	8.70074	11.1347	2.68497e-08	2.15157e-06
ENSG00000102362	SYTL4	ENST00000685623;ENST00000491602;ENST00000372989;ENST00000372981;ENST00000276141;ENST00000263033	GO:0001778(plasma membrane repair);GO:0005515(protein binding);GO:0005543(phospholipid binding);GO:0005768(endosome);GO:0005886(plasma membrane);GO:0006886(intracellular protein transport);GO:0006887(exocytosis);GO:0016020(membrane);GO:0019898(extrinsic component of membrane);GO:0030073(insulin secretion);GO:0030141(secretory granule);GO:0030658(transport vesicle membrane);GO:0031092(platelet alp…	NA	synaptotagmin like 4 [Source:HGNC Symbol;Acc:HGNC:15588]	protein_coding;processed_transcript	2.59142	3.44091	3.40696	3.33977	10.5273	7.99061	2.77574e-08	2.21247e-06
ENSG00000186474	KLK12	ENST00000684732;ENST00000529888;ENST00000319590;ENST00000530943;ENST00000526824;ENST00000531374;ENST00000250351;ENST00000525263	GO:0004252(serine-type endopeptidase activity);GO:0005576(extracellular region);GO:0005615(extracellular space);GO:0006508(proteolysis);GO:0008233(peptidase activity);GO:0008236(serine-type peptidase activity);GO:0016787(hydrolase activity);GO:0030141(secretory granule);GO:0030141(secretory granule)	NA	kallikrein related peptidase 12 [Source:HGNC Symbol;Acc:HGNC:6360]	protein_coding;nonsense_mediated_decay	10.7328	3.84486	2.14319	1.27659	0.799149	0.90792	2.9301e-08	2.32315e-06
ENSG00000130675	MNX1	ENST00000252971;ENST00000605400;ENST00000543409;ENST00000479817;ENST00000474448	GO:0000785(chromatin);GO:0000981(DNA-binding transcription factor activity, RNA polymerase II-specific);GO:0003677(DNA binding);GO:0005634(nucleus);GO:0005654(nucleoplasm);GO:0005730(nucleolus);GO:0005829(cytosol);GO:0006355(regulation of DNA-templated transcription);GO:0006357(regulation of transcription by RNA polymerase II);GO:0007417(central nervous system development);GO:0021520(spinal cord …	04950(Maturity onset diabetes of the young);04950(Maturity onset diabetes of the young)	motor neuron and pancreas homeobox 1 [Source:HGNC Symbol;Acc:HGNC:4979]	protein_coding;retained_intron;nonsense_mediated_decay	3.4876	3.09318	4.20522	2.41155	0.494801	0.670181	3.02006e-08	2.38187e-06
ENSG00000136244	IL6	ENST00000258743;ENST00000401651;ENST00000404625;ENST00000485300;ENST00000464710;ENST00000426291;ENST00000407492;ENST00000406575	GO:0001781(neutrophil apoptotic process);GO:0002314(germinal center B cell differentiation);GO:0002384(hepatic immune response);GO:0002446(neutrophil mediated immunity);GO:0002548(monocyte chemotaxis);GO:0002639(positive regulation of immunoglobulin production);GO:0002675(positive regulation of acute inflammatory response);GO:0002690(positive regulation of leukocyte chemotaxis);GO:0005102(signali…	01521(EGFR tyrosine kinase inhibitor resistance);01523(Antifolate resistance);04060(Cytokine-cytokine receptor interaction);04061(Viral protein interaction with cytokine and cytokine receptor);04066(HIF-1 signaling pathway);04068(FoxO signaling pathway);04151(PI3K-Akt signaling pathway);04218(Cellular senescence);04620(Toll-like receptor signaling pathway);04621(NOD-like receptor signaling pathwa…	interleukin 6 [Source:HGNC Symbol;Acc:HGNC:6018]	protein_coding;retained_intron	0.296695	0.384442	0.645765	0.298174	0	0.0118113	3.19845e-08	2.49485e-06
ENSG00000124249	KCNK15	ENST00000372861	GO:0005267(potassium channel activity);GO:0005886(plasma membrane);GO:0005887(integral component of plasma membrane);GO:0006811(ion transport);GO:0006813(potassium ion transport);GO:0016020(membrane);GO:0016021(integral component of membrane);GO:0022841(potassium ion leak channel activity);GO:0030322(stabilization of membrane potential);GO:0034765(regulation of ion transmembrane transport);GO:007…	NA	potassium two pore domain channel subfamily K member 15 [Source:HGNC Symbol;Acc:HGNC:13814]	protein_coding	19.495	11.7931	15.7909	9.50213	2.9386	3.23298	3.20289e-08	2.49485e-06
ENSG00000175920	DOK7	ENST00000340083;ENST00000507039;ENST00000515886;ENST00000643608;ENST00000513995;ENST00000503688;ENST00000511267	GO:0005515(protein binding);GO:0005654(nucleoplasm);GO:0005739(mitochondrion);GO:0005886(plasma membrane);GO:0007528(neuromuscular junction development);GO:0008289(lipid binding);GO:0016020(membrane);GO:0019901(protein kinase binding);GO:0030054(cell junction);GO:0045202(synapse);GO:0061098(positive regulation of protein tyrosine kinase activity);GO:0061098(positive regulation of protein tyrosine…	NA	docking protein 7 [Source:HGNC Symbol;Acc:HGNC:26594]	protein_coding;retained_intron;processed_transcript	13.0801	10.9359	12.2667	9.5605	2.07831	3.45643	3.21326e-08	2.49485e-06
ENSG00000006015	REX1BD	ENST00000358607;ENST00000450195;ENST00000597371;ENST00000600997;ENST00000595490;ENST00000598375;ENST00000595077;ENST00000601736	GO:0005515(protein binding);GO:0005515(protein binding)	NA	required for excision 1-B domain containing [Source:HGNC Symbol;Acc:HGNC:26098]	protein_coding;retained_intron;nonsense_mediated_decay	6.42992	3.74254	4.46803	3.23332	0.688469	0.907888	3.30455e-08	2.55251e-06
ENSG00000089127	OAS1	ENST00000553152;ENST00000452357;ENST00000202917;ENST00000679767;ENST00000681466;ENST00000550689;ENST00000680919;ENST00000550883;ENST00000681505;ENST00000679413;ENST00000681194;ENST00000445409;ENST00000553185;ENST00000681831;ENST00000549820;ENST00000679467	GO:0000166(nucleotide binding);GO:0001730(2'-5'-oligoadenylate synthetase activity);GO:0002376(immune system process);GO:0003723(RNA binding);GO:0003725(double-stranded RNA binding);GO:0005515(protein binding);GO:0005524(ATP binding);GO:0005576(extracellular region);GO:0005634(nucleus);GO:0005654(nucleoplasm);GO:0005737(cytoplasm);GO:0005739(mitochondrion);GO:0005783(endoplasmic reticulum);GO:000…	04621(NOD-like receptor signaling pathway);05160(Hepatitis C);05162(Measles);05164(Influenza A);05168(Herpes simplex virus 1 infection);05169(Epstein-Barr virus infection);05171(Coronavirus disease - COVID-19);05171(Coronavirus disease - COVID-19)	2'-5'-oligoadenylate synthetase 1 [Source:HGNC Symbol;Acc:HGNC:8086]	protein_coding;nonsense_mediated_decay;processed_transcript;retained_intron	1.2274	0.847927	1.40381	1.03896	0.225538	0.217568	3.55737e-08	2.7337e-06
ENSG00000109472	CPE	ENST00000402744	GO:0003214(cardiac left ventricle morphogenesis);GO:0004180(carboxypeptidase activity);GO:0004181(metallocarboxypeptidase activity);GO:0005515(protein binding);GO:0005576(extracellular region);GO:0005615(extracellular space);GO:0005794(Golgi apparatus);GO:0005886(plasma membrane);GO:0006508(proteolysis);GO:0006518(peptide metabolic process);GO:0007218(neuropeptide signaling pathway);GO:0008233(pe…	04940(Type I diabetes mellitus)	carboxypeptidase E [Source:HGNC Symbol;Acc:HGNC:2303]	protein_coding	2.73217	2.02753	2.7167	1.34789	8.41459	9.13169	3.58652e-08	2.74204e-06
ENSG00000187024	PTRH1	ENST00000543175;ENST00000641641;ENST00000419060;ENST00000456267;ENST00000335223;ENST00000414832;ENST00000416214	GO:0003723(RNA binding);GO:0004045(aminoacyl-tRNA hydrolase activity);GO:0005515(protein binding);GO:0016787(hydrolase activity);GO:0016787(hydrolase activity)	NA	peptidyl-tRNA hydrolase 1 homolog [Source:HGNC Symbol;Acc:HGNC:27039]	protein_coding	3.68253	1.84593	2.00266	1.26581	0.366137	0.246973	3.65285e-08	2.77858e-06
ENSG00000172216	CEBPB	ENST00000303004	GO:0000122(negative regulation of transcription by RNA polymerase II);GO:0000779(condensed chromosome, centromeric region);GO:0000785(chromatin);GO:0000976(transcription cis-regulatory region binding);GO:0000977(RNA polymerase II transcription regulatory region sequence-specific DNA binding);GO:0000978(RNA polymerase II cis-regulatory region sequence-specific DNA binding);GO:0000979(RNA polymeras…	04657(IL-17 signaling pathway);04668(TNF signaling pathway);05152(Tuberculosis);05202(Transcriptional misregulation in cancer)	CCAAT enhancer binding protein beta [Source:HGNC Symbol;Acc:HGNC:1834]	protein_coding	50.8753	29.0085	52.8267	29.1719	4.37742	9.47371	3.73221e-08	2.82461e-06
ENSG00000142409	ZNF787	ENST00000610935;ENST00000587279	GO:0000981(DNA-binding transcription factor activity, RNA polymerase II-specific);GO:0003677(DNA binding);GO:0005634(nucleus);GO:0006357(regulation of transcription by RNA polymerase II);GO:0043565(sequence-specific DNA binding);GO:0046872(metal ion binding);GO:1990837(sequence-specific double-stranded DNA binding);GO:1990837(sequence-specific double-stranded DNA binding)	NA	zinc finger protein 787 [Source:HGNC Symbol;Acc:HGNC:26998]	protein_coding	8.47285	7.68026	8.96031	5.76525	1.62793	2.03727	3.87226e-08	2.91587e-06
ENSG00000177508	IRX3	ENST00000558180;ENST00000329734	GO:0000122(negative regulation of transcription by RNA polymerase II);GO:0000785(chromatin);GO:0000978(RNA polymerase II cis-regulatory region sequence-specific DNA binding);GO:0000981(DNA-binding transcription factor activity, RNA polymerase II-specific);GO:0001227(DNA-binding transcription repressor activity, RNA polymerase II-specific);GO:0001228(DNA-binding transcription activator activity, R…	NA	iroquois homeobox 3 [Source:HGNC Symbol;Acc:HGNC:14360]	retained_intron;protein_coding	8.24598	6.80593	12.7447	11.9121	2.83849	2.98644	4.52682e-08	3.39172e-06
ENSG00000070423	RNF126	ENST00000292363;ENST00000586749;ENST00000589762;ENST00000590885;ENST00000605891;ENST00000591394;ENST00000592626	GO:0005154(epidermal growth factor receptor binding);GO:0005515(protein binding);GO:0005634(nucleus);GO:0005654(nucleoplasm);GO:0005737(cytoplasm);GO:0005829(cytosol);GO:0006511(ubiquitin-dependent protein catabolic process);GO:0006513(protein monoubiquitination);GO:0016567(protein ubiquitination);GO:0016740(transferase activity);GO:0042059(negative regulation of epidermal growth factor receptor …	NA	ring finger protein 126 [Source:HGNC Symbol;Acc:HGNC:21151]	protein_coding;retained_intron;processed_transcript;nonsense_mediated_decay	8.91568	8.62484	7.07792	6.52986	1.95159	2.21382	4.88966e-08	3.64535e-06
ENSG00000272933	TRIM8-DT	ENST00000607967	NA	NA	TRIM8 divergent transcript [Source:HGNC Symbol;Acc:HGNC:55573]	lncRNA	1.80376	2.44324	1.40053	1.5083	0.125755	0.138397	5.14924e-08	3.81987e-06
ENSG00000277209	RPPH1	ENST00000516869	GO:0004526(ribonuclease P activity);GO:0008033(tRNA processing);GO:0030677(ribonuclease P complex);GO:0090501(RNA phosphodiester bond hydrolysis);GO:0090502(RNA phosphodiester bond hydrolysis, endonucleolytic)	NA	ribonuclease P RNA component H1 [Source:HGNC Symbol;Acc:HGNC:19273]	ribozyme	4.0667	2.21108	10.5503	18.3316	0.79212	1.48515	5.20892e-08	3.8451e-06
ENSG00000170604	IRF2BP1	ENST00000302165	GO:0000122(negative regulation of transcription by RNA polymerase II);GO:0000209(protein polyubiquitination);GO:0003714(transcription corepressor activity);GO:0005515(protein binding);GO:0005634(nucleus);GO:0005654(nucleoplasm);GO:0006357(regulation of transcription by RNA polymerase II);GO:0016740(transferase activity);GO:0046872(metal ion binding);GO:0061630(ubiquitin protein ligase activity)	NA	interferon regulatory factor 2 binding protein 1 [Source:HGNC Symbol;Acc:HGNC:21728]	protein_coding	19.7398	22.6148	18.7385	16.0816	4.88348	6.20647	5.91964e-08	4.34832e-06
ENSG00000167700	MFSD3	ENST00000301327;ENST00000534427;ENST00000528047;ENST00000526749	GO:0005515(protein binding);GO:0015295(solute:proton symporter activity);GO:0016020(membrane);GO:0016021(integral component of membrane);GO:0022857(transmembrane transporter activity);GO:0055085(transmembrane transport);GO:1902600(proton transmembrane transport);GO:1902600(proton transmembrane transport)	NA	major facilitator superfamily domain containing 3 [Source:HGNC Symbol;Acc:HGNC:25157]	protein_coding;retained_intron	12.3966	7.64824	11.1309	6.3735	1.14295	1.93012	6.26186e-08	4.55505e-06
ENSG00000107518	ATRNL1	ENST00000355044;ENST00000616894;ENST00000527407;ENST00000650603;ENST00000609571	GO:0005515(protein binding);GO:0005604(basement membrane);GO:0007186(G protein-coupled receptor signaling pathway);GO:0009887(animal organ morphogenesis);GO:0009888(tissue development);GO:0016020(membrane);GO:0016021(integral component of membrane);GO:0016477(cell migration);GO:0030246(carbohydrate binding);GO:0034446(substrate adhesion-dependent cell spreading);GO:0034446(substrate adhesion-depe…	NA	attractin like 1 [Source:HGNC Symbol;Acc:HGNC:29063]	protein_coding;nonsense_mediated_decay	1.16165	1.06189	0.6955	0.777319	2.926	2.60831	7.23912e-08	5.2405e-06
ENSG00000099624	ATP5F1D	ENST00000588538;ENST00000590265;ENST00000215375;ENST00000395633;ENST00000592624;ENST00000614837;ENST00000589478;ENST00000591660;ENST00000591249	GO:0000275(mitochondrial proton-transporting ATP synthase complex, catalytic sector F(1));GO:0005515(protein binding);GO:0005524(ATP binding);GO:0005739(mitochondrion);GO:0005743(mitochondrial inner membrane);GO:0005753(mitochondrial proton-transporting ATP synthase complex);GO:0005759(mitochondrial matrix);GO:0006754(ATP biosynthetic process);GO:0006811(ion transport);GO:0009060(aerobic respirat…	00190(Oxidative phosphorylation);01100(Metabolic pathways);04714(Thermogenesis);05010(Alzheimer disease);05012(Parkinson disease);05014(Amyotrophic lateral sclerosis);05016(Huntington disease);05020(Prion disease);05022(Pathways of neurodegeneration - multiple diseases);05022(Pathways of neurodegeneration - multiple diseases)	ATP synthase F1 subunit delta [Source:HGNC Symbol;Acc:HGNC:837]	retained_intron;protein_coding	30.6106	18.4984	21.3612	14.3192	3.55595	5.9531	7.41309e-08	5.34063e-06
ENSG00000223729	LINC02247	ENST00000417135	NA	NA	long intergenic non-protein coding RNA 2247 [Source:HGNC Symbol;Acc:HGNC:53140]	lncRNA	9.17696	4.5744	6.08009	4.38692	0.791885	0.372836	7.49635e-08	5.37478e-06
ENSG00000173156	RHOD	ENST00000308831;ENST00000532559;ENST00000533360	GO:0000139(Golgi membrane);GO:0000166(nucleotide binding);GO:0003924(GTPase activity);GO:0005085(guanyl-nucleotide exchange factor activity);GO:0005525(GTP binding);GO:0005741(mitochondrial outer membrane);GO:0005768(endosome);GO:0005769(early endosome);GO:0005829(cytosol);GO:0005856(cytoskeleton);GO:0005886(plasma membrane);GO:0005938(cell cortex);GO:0007015(actin filament organization);GO:00071…	04360(Axon guidance);04360(Axon guidance)	ras homolog family member D [Source:HGNC Symbol;Acc:HGNC:670]	protein_coding;processed_transcript	53.6853	35.1704	24.2976	18.5842	8.32291	11.8358	7.89477e-08	5.63348e-06
ENSG00000082212	ME2	ENST00000321341;ENST00000640530;ENST00000639663;ENST00000589330;ENST00000591925;ENST00000638768	GO:0003824(catalytic activity);GO:0004470(malic enzyme activity);GO:0004471(malate dehydrogenase (decarboxylating) (NAD+) activity);GO:0004473(malate dehydrogenase (decarboxylating) (NADP+) activity);GO:0005739(mitochondrion);GO:0005759(mitochondrial matrix);GO:0006090(pyruvate metabolic process);GO:0006108(malate metabolic process);GO:0008152(metabolic process);GO:0008948(oxaloacetate decarboxyl…	00620(Pyruvate metabolism);01200(Carbon metabolism);01200(Carbon metabolism)	malic enzyme 2 [Source:HGNC Symbol;Acc:HGNC:6984]	protein_coding;nonsense_mediated_decay;retained_intron	0.417629	0.419397	0.269461	0.188813	1.02292	1.12577	8.08816e-08	5.74412e-06
ENSG00000178235	SLITRK1	ENST00000377084	GO:0005515(protein binding);GO:0005576(extracellular region);GO:0005886(plasma membrane);GO:0007399(nervous system development);GO:0007409(axonogenesis);GO:0007416(synapse assembly);GO:0016020(membrane);GO:0016021(integral component of membrane);GO:0030054(cell junction);GO:0030534(adult behavior);GO:0035264(multicellular organism growth);GO:0042592(homeostatic process);GO:0045202(synapse);GO:005…	NA	SLIT and NTRK like family member 1 [Source:HGNC Symbol;Acc:HGNC:20297]	protein_coding	0.0584142	0.0835045	0.0585678	0.0963372	0.771597	0.513875	8.15397e-08	5.76355e-06
ENSG00000130511	SSBP4	ENST00000593641;ENST00000270061;ENST00000348495;ENST00000602088;ENST00000600244;ENST00000601919;ENST00000607020;ENST00000599699;ENST00000601444;ENST00000601357;ENST00000601614	GO:0003677(DNA binding);GO:0003697(single-stranded DNA binding);GO:0005515(protein binding);GO:0005634(nucleus);GO:0016020(membrane);GO:0016021(integral component of membrane);GO:0045944(positive regulation of transcription by RNA polymerase II);GO:0045944(positive regulation of transcription by RNA polymerase II)	NA	single stranded DNA binding protein 4 [Source:HGNC Symbol;Acc:HGNC:15676]	protein_coding;retained_intron;nonsense_mediated_decay	17.1841	14.1668	13.9113	8.85559	3.13533	4.08981	8.24151e-08	5.79807e-06
ENSG00000134107	BHLHE40	ENST00000256495;ENST00000460806;ENST00000467610	GO:0000122(negative regulation of transcription by RNA polymerase II);GO:0000785(chromatin);GO:0000978(RNA polymerase II cis-regulatory region sequence-specific DNA binding);GO:0000981(DNA-binding transcription factor activity, RNA polymerase II-specific);GO:0001227(DNA-binding transcription repressor activity, RNA polymerase II-specific);GO:0003677(DNA binding);GO:0003700(DNA-binding transcripti…	04710(Circadian rhythm);04710(Circadian rhythm)	basic helix-loop-helix family member e40 [Source:HGNC Symbol;Acc:HGNC:1046]	protein_coding;retained_intron	16.3416	18.9223	34.0171	39.8159	11.0873	10.798	8.36755e-08	5.85924e-06
ENSG00000181625	SLX1B	ENST00000330181;ENST00000565219;ENST00000351581;ENST00000566424;ENST00000567248	GO:0000724(double-strand break repair via homologous recombination);GO:0004518(nuclease activity);GO:0004519(endonuclease activity);GO:0005515(protein binding);GO:0005634(nucleus);GO:0005654(nucleoplasm);GO:0006281(DNA repair);GO:0006310(DNA recombination);GO:0006974(cellular response to DNA damage stimulus);GO:0008821(crossover junction endodeoxyribonuclease activity);GO:0010792(DNA double-stran…	03460(Fanconi anemia pathway);03460(Fanconi anemia pathway)	SLX1 homolog B, structure-specific endonuclease subunit [Source:HGNC Symbol;Acc:HGNC:28748]	protein_coding;retained_intron	11.6688	9.92399	11.0468	10.3243	2.0478	3.19546	9.53703e-08	6.64709e-06
ENSG00000207422	RNU6-813P	ENST00000384691	GO:0000244(spliceosomal tri-snRNP complex assembly);GO:0000353(formation of quadruple SL/U4/U5/U6 snRNP);GO:0005688(U6 snRNP);GO:0030621(U4 snRNA binding);GO:0046540(U4/U6 x U5 tri-snRNP complex)	NA	RNA, U6 small nuclear 813, pseudogene [Source:HGNC Symbol;Acc:HGNC:47776]	snRNA	1.84738	4.45378	14.2044	43.2293	89.5262	33.5002	9.82676e-08	6.81731e-06
ENSG00000122877	EGR2	ENST00000242480;ENST00000691610;ENST00000439032;ENST00000411732	GO:0000785(chromatin);GO:0000976(transcription cis-regulatory region binding);GO:0000978(RNA polymerase II cis-regulatory region sequence-specific DNA binding);GO:0000981(DNA-binding transcription factor activity, RNA polymerase II-specific);GO:0001228(DNA-binding transcription activator activity, RNA polymerase II-specific);GO:0003677(DNA binding);GO:0003682(chromatin binding);GO:0003700(DNA-bin…	04625(C-type lectin receptor signaling pathway);05161(Hepatitis B);05166(Human T-cell leukemia virus 1 infection);05203(Viral carcinogenesis);05203(Viral carcinogenesis)	early growth response 2 [Source:HGNC Symbol;Acc:HGNC:3239]	protein_coding;nonsense_mediated_decay	0.31989	0.333316	0.092656	0.236766	0	0	1.04504e-07	7.21659e-06
ENSG00000196542	SPTSSB	ENST00000620149;ENST00000497137;ENST00000359175;ENST00000497374	GO:0004758(serine C-palmitoyltransferase activity);GO:0005515(protein binding);GO:0005783(endoplasmic reticulum);GO:0005789(endoplasmic reticulum membrane);GO:0006629(lipid metabolic process);GO:0006665(sphingolipid metabolic process);GO:0007029(endoplasmic reticulum organization);GO:0016020(membrane);GO:0016021(integral component of membrane);GO:0017059(serine C-palmitoyltransferase complex);GO:…	NA	serine palmitoyltransferase small subunit B [Source:HGNC Symbol;Acc:HGNC:24045]	protein_coding;retained_intron	342.983	232.443	415.759	292.329	743.256	868.405	1.12195e-07	7.71214e-06
ENSG00000072832	CRMP1	ENST00000324989;ENST00000397890;ENST00000513911;ENST00000506216	GO:0000226(microtubule cytoskeleton organization);GO:0005515(protein binding);GO:0005737(cytoplasm);GO:0005813(centrosome);GO:0005815(microtubule organizing center);GO:0005819(spindle);GO:0005829(cytosol);GO:0005856(cytoskeleton);GO:0006139(nucleobase-containing compound metabolic process);GO:0007399(nervous system development);GO:0007411(axon guidance);GO:0010977(negative regulation of neuron pr…	NA	collapsin response mediator protein 1 [Source:HGNC Symbol;Acc:HGNC:2365]	protein_coding;processed_transcript	0.0815209	0.117823	0.141692	0.103816	0.649938	0.763956	1.25171e-07	8.56476e-06
ENSG00000181649	PHLDA2	ENST00000314222	GO:0001890(placenta development);GO:0005515(protein binding);GO:0005737(cytoplasm);GO:0006915(apoptotic process);GO:0009887(animal organ morphogenesis);GO:0010468(regulation of gene expression);GO:0016020(membrane);GO:0030334(regulation of cell migration);GO:0043065(positive regulation of apoptotic process);GO:0045995(regulation of embryonic development);GO:0060721(regulation of spongiotrophoblas…	NA	pleckstrin homology like domain family A member 2 [Source:HGNC Symbol;Acc:HGNC:12385]	protein_coding	18.5041	21.4068	11.2582	11.1187	1.26031	3.82817	1.42453e-07	9.70296e-06
ENSG00000287262	ENSG00000287262	ENST00000662380	NA	NA	novel transcript	lncRNA	1.07008	0.538638	1.82225	1.10238	3.80249	6.3027	1.49395e-07	1.01298e-05
ENSG00000137801	THBS1	ENST00000260356;ENST00000484734;ENST00000497720;ENST00000397591;ENST00000490247;ENST00000466755;ENST00000559746;ENST00000560894	GO:0001666(response to hypoxia);GO:0001786(phosphatidylserine binding);GO:0001937(negative regulation of endothelial cell proliferation);GO:0001953(negative regulation of cell-matrix adhesion);GO:0001968(fibronectin binding);GO:0002040(sprouting angiogenesis);GO:0002544(chronic inflammatory response);GO:0002581(negative regulation of antigen processing and presentation of peptide or polysaccharid…	04015(Rap1 signaling pathway);04115(p53 signaling pathway);04145(Phagosome);04151(PI3K-Akt signaling pathway);04350(TGF-beta signaling pathway);04510(Focal adhesion);04512(ECM-receptor interaction);05144(Malaria);05165(Human papillomavirus infection);05205(Proteoglycans in cancer);05206(MicroRNAs in cancer);05219(Bladder cancer);05219(Bladder cancer)	thrombospondin 1 [Source:HGNC Symbol;Acc:HGNC:11785]	protein_coding;retained_intron	17.2556	27.9067	25.0764	49.7953	109.058	79.0924	1.52714e-07	1.03082e-05
ENSG00000063245	EPN1	ENST00000085079;ENST00000270460;ENST00000411543;ENST00000586194;ENST00000589704	GO:0001701(in utero embryonic development);GO:0005515(protein binding);GO:0005543(phospholipid binding);GO:0005634(nucleus);GO:0005737(cytoplasm);GO:0005768(endosome);GO:0005829(cytosol);GO:0005886(plasma membrane);GO:0005905(clathrin-coated pit);GO:0006897(endocytosis);GO:0007219(Notch signaling pathway);GO:0007565(female pregnancy);GO:0008289(lipid binding);GO:0016020(membrane);GO:0030125(clath…	04144(Endocytosis);04144(Endocytosis)	epsin 1 [Source:HGNC Symbol;Acc:HGNC:21604]	protein_coding;retained_intron	9.70047	9.19947	9.58245	8.99046	3.00191	3.16194	1.53833e-07	1.03372e-05
ENSG00000112936	C7	ENST00000313164;ENST00000696334;ENST00000696442;ENST00000486779;ENST00000464864;ENST00000489457	GO:0002376(immune system process);GO:0005515(protein binding);GO:0005576(extracellular region);GO:0005579(membrane attack complex);GO:0005886(plasma membrane);GO:0006955(immune response);GO:0006956(complement activation);GO:0006957(complement activation, alternative pathway);GO:0006958(complement activation, classical pathway);GO:0019835(cytolysis);GO:0045087(innate immune response);GO:0050778(po…	04610(Complement and coagulation cascades);05020(Prion disease);05171(Coronavirus disease - COVID-19);05322(Systemic lupus erythematosus);05322(Systemic lupus erythematosus)	complement C7 [Source:HGNC Symbol;Acc:HGNC:1346]	protein_coding;retained_intron;processed_transcript	0	0	0.0167348	0	0.175817	0.178203	1.6042e-07	1.07317e-05
ENSG00000137502	RAB30	ENST00000527633;ENST00000526205;ENST00000612684;ENST00000260056;ENST00000532548;ENST00000531021;ENST00000534141;ENST00000530224;ENST00000533276;ENST00000533486;ENST00000534301;ENST00000525117	GO:0000139(Golgi membrane);GO:0000166(nucleotide binding);GO:0003924(GTPase activity);GO:0005515(protein binding);GO:0005525(GTP binding);GO:0005737(cytoplasm);GO:0005794(Golgi apparatus);GO:0005795(Golgi stack);GO:0005801(cis-Golgi network);GO:0005802(trans-Golgi network);GO:0007030(Golgi organization);GO:0016020(membrane);GO:0031985(Golgi cisterna);GO:0032482(Rab protein signal transduction);GO…	NA	RAB30, member RAS oncogene family [Source:HGNC Symbol;Acc:HGNC:9770]	protein_coding	1.95481	3.00383	3.90177	4.67412	10.3579	7.43211	1.95929e-07	1.29911e-05
ENSG00000017483	SLC38A5	ENST00000595796;ENST00000619100;ENST00000440085;ENST00000413668;ENST00000480105;ENST00000615300	GO:0003333(amino acid transmembrane transport);GO:0005290(L-histidine transmembrane transporter activity);GO:0005886(plasma membrane);GO:0005887(integral component of plasma membrane);GO:0006865(amino acid transport);GO:0006867(asparagine transport);GO:0006868(glutamine transport);GO:0015171(amino acid transmembrane transporter activity);GO:0015182(L-asparagine transmembrane transporter activity)…	04727(GABAergic synapse);04727(GABAergic synapse)	solute carrier family 38 member 5 [Source:HGNC Symbol;Acc:HGNC:18070]	protein_coding;retained_intron	0.317879	0.273383	0.325632	0.561608	0.0113979	0.0116534	1.9544e-07	1.29911e-05
ENSG00000026559	KCNG1	ENST00000371571;ENST00000424171;ENST00000506387;ENST00000439216;ENST00000433903;ENST00000447736	GO:0005216(ion channel activity);GO:0005244(voltage-gated ion channel activity);GO:0005249(voltage-gated potassium channel activity);GO:0005251(delayed rectifier potassium channel activity);GO:0005267(potassium channel activity);GO:0005515(protein binding);GO:0005886(plasma membrane);GO:0006811(ion transport);GO:0006813(potassium ion transport);GO:0008076(voltage-gated potassium channel complex);…	NA	potassium voltage-gated channel modifier subfamily G member 1 [Source:HGNC Symbol;Acc:HGNC:6248]	protein_coding;processed_transcript	2.01816	2.42186	1.48208	1.53135	0.424306	0.144353	2.24619e-07	1.46787e-05
ENSG00000107159	CA9	ENST00000378357;ENST00000485665	GO:0001666(response to hypoxia);GO:0002009(morphogenesis of an epithelium);GO:0004089(carbonate dehydratase activity);GO:0005515(protein binding);GO:0005634(nucleus);GO:0005730(nucleolus);GO:0005886(plasma membrane);GO:0006730(one-carbon metabolic process);GO:0008270(zinc ion binding);GO:0009410(response to xenobiotic stimulus);GO:0016020(membrane);GO:0016021(integral component of membrane);GO:00…	00910(Nitrogen metabolism);01100(Metabolic pathways);01100(Metabolic pathways)	carbonic anhydrase 9 [Source:HGNC Symbol;Acc:HGNC:1383]	protein_coding;processed_transcript	1.78519	1.67136	1.31664	1.786	0	0.119819	2.24632e-07	1.46787e-05
ENSG00000101144	BMP7	ENST00000433911;ENST00000395864;ENST00000395863;ENST00000450594;ENST00000463939;ENST00000524700;ENST00000530870;ENST00000476877;ENST00000460817	GO:0001501(skeletal system development);GO:0001503(ossification);GO:0001654(eye development);GO:0001656(metanephros development);GO:0001657(ureteric bud development);GO:0001707(mesoderm formation);GO:0001822(kidney development);GO:0001823(mesonephros development);GO:0001837(epithelial to mesenchymal transition);GO:0003272(endocardial cushion formation);GO:0003344(pericardium morphogenesis);GO:000…	04060(Cytokine-cytokine receptor interaction);04350(TGF-beta signaling pathway);04360(Axon guidance);04390(Hippo signaling pathway);04390(Hippo signaling pathway)	bone morphogenetic protein 7 [Source:HGNC Symbol;Acc:HGNC:1074]	protein_coding;processed_transcript;retained_intron	314.184	282.202	262.822	261.371	110.096	107.02	2.24957e-07	1.46787e-05
ENSG00000285382	ENSG00000285382	ENST00000642630;ENST00000645058	NA	NA	novel protein	nonsense_mediated_decay	0.0658271	0.336614	0.248132	0.237794	0	0	2.25367e-07	1.46787e-05
ENSG00000134013	LOXL2	ENST00000389131;ENST00000522446;ENST00000520617;ENST00000519243;ENST00000520871;ENST00000520925;ENST00000520349	GO:0000122(negative regulation of transcription by RNA polymerase II);GO:0000785(chromatin);GO:0001666(response to hypoxia);GO:0001837(epithelial to mesenchymal transition);GO:0001935(endothelial cell proliferation);GO:0002040(sprouting angiogenesis);GO:0004720(protein-lysine 6-oxidase activity);GO:0005044(scavenger receptor activity);GO:0005507(copper ion binding);GO:0005509(calcium ion binding)…	NA	lysyl oxidase like 2 [Source:HGNC Symbol;Acc:HGNC:6666]	protein_coding;retained_intron	1.80621	2.04428	0.630598	0.921785	0.358463	0.312495	2.26278e-07	1.46787e-05
ENSG00000102871	TRADD	ENST00000345057;ENST00000486556;ENST00000563348;ENST00000566104;ENST00000566247	GO:0002947(tumor necrosis factor receptor superfamily complex);GO:0005068(transmembrane receptor protein tyrosine kinase adaptor activity);GO:0005164(tumor necrosis factor receptor binding);GO:0005515(protein binding);GO:0005634(nucleus);GO:0005737(cytoplasm);GO:0005829(cytosol);GO:0005856(cytoskeleton);GO:0005886(plasma membrane);GO:0006915(apoptotic process);GO:0007165(signal transduction);GO:0…	04010(MAPK signaling pathway);04064(NF-kappa B signaling pathway);04071(Sphingolipid signaling pathway);04210(Apoptosis);04217(Necroptosis);04622(RIG-I-like receptor signaling pathway);04657(IL-17 signaling pathway);04668(TNF signaling pathway);04920(Adipocytokine signaling pathway);05130(Pathogenic Escherichia coli infection);05131(Shigellosis);05132(Salmonella infection);05152(Tuberculosis);051…	TNFRSF1A associated via death domain [Source:HGNC Symbol;Acc:HGNC:12030]	protein_coding;retained_intron;processed_transcript	7.36289	6.32837	5.42839	4.16418	1.2296	1.46422	2.32265e-07	1.50021e-05
ENSG00000148798	INA	ENST00000369849	GO:0005200(structural constituent of cytoskeleton);GO:0005515(protein binding);GO:0005615(extracellular space);GO:0005737(cytoplasm);GO:0005882(intermediate filament);GO:0005883(neurofilament);GO:0007399(nervous system development);GO:0021762(substantia nigra development);GO:0030154(cell differentiation);GO:0036464(cytoplasmic ribonucleoprotein granule);GO:0045104(intermediate filament cytoskelet…	NA	internexin neuronal intermediate filament protein alpha [Source:HGNC Symbol;Acc:HGNC:6057]	protein_coding	0.09388	0.087597	0	0.067585	0.969285	0.887509	2.42122e-07	1.55717e-05
ENSG00000185745	IFIT1	ENST00000371804;ENST00000546318	GO:0002376(immune system process);GO:0003723(RNA binding);GO:0005515(protein binding);GO:0005737(cytoplasm);GO:0005829(cytosol);GO:0009615(response to virus);GO:0019060(intracellular transport of viral protein in host cell);GO:0032091(negative regulation of protein binding);GO:0043657(host cell);GO:0045070(positive regulation of viral genome replication);GO:0045071(negative regulation of viral ge…	05160(Hepatitis C);05160(Hepatitis C)	interferon induced protein with tetratricopeptide repeats 1 [Source:HGNC Symbol;Acc:HGNC:5407]	protein_coding	1.98139	1.4194	3.58424	2.0485	0.45994	0.43483	2.59413e-07	1.66124e-05
ENSG00000087245	MMP2	ENST00000219070	GO:0001525(angiogenesis);GO:0001541(ovarian follicle development);GO:0001542(ovulation from ovarian follicle);GO:0001553(luteinization);GO:0001666(response to hypoxia);GO:0001955(blood vessel maturation);GO:0001957(intramembranous ossification);GO:0001968(fibronectin binding);GO:0004175(endopeptidase activity);GO:0004222(metalloendopeptidase activity);GO:0004252(serine-type endopeptidase activity…	01522(Endocrine resistance);04670(Leukocyte transendothelial migration);04912(GnRH signaling pathway);04915(Estrogen signaling pathway);04926(Relaxin signaling pathway);04933(AGE-RAGE signaling pathway in diabetic complications);05200(Pathways in cancer);05205(Proteoglycans in cancer);05219(Bladder cancer);05418(Fluid shear stress and atherosclerosis)	matrix metallopeptidase 2 [Source:HGNC Symbol;Acc:HGNC:7166]	protein_coding	0.554816	0.518644	0.471998	0.449029	0.0416386	0.0459523	2.80552e-07	1.78138e-05
ENSG00000109321	AREG	ENST00000395748;ENST00000511560	GO:0005125(cytokine activity);GO:0005154(epidermal growth factor receptor binding);GO:0005515(protein binding);GO:0005576(extracellular region);GO:0005615(extracellular space);GO:0005634(nucleus);GO:0005737(cytoplasm);GO:0005789(endoplasmic reticulum membrane);GO:0007165(signal transduction);GO:0007171(activation of transmembrane receptor protein tyrosine kinase activity);GO:0007173(epidermal gro…	04010(MAPK signaling pathway);04012(ErbB signaling pathway);04151(PI3K-Akt signaling pathway);04390(Hippo signaling pathway);05210(Colorectal cancer);05210(Colorectal cancer)	amphiregulin [Source:HGNC Symbol;Acc:HGNC:651]	protein_coding;retained_intron	208.455	118.499	273.171	170.849	36.9957	58.5957	3.0295e-07	1.91549e-05
ENSG00000102024	PLS3	ENST00000355899;ENST00000466150;ENST00000481823;ENST00000539310;ENST00000289290	GO:0003779(actin binding);GO:0005509(calcium ion binding);GO:0005515(protein binding);GO:0005737(cytoplasm);GO:0005829(cytosol);GO:0005884(actin filament);GO:0005886(plasma membrane);GO:0032432(actin filament bundle);GO:0046872(metal ion binding);GO:0051015(actin filament binding);GO:0051017(actin filament bundle assembly);GO:0051639(actin filament network formation);GO:0060348(bone development);…	NA	plastin 3 [Source:HGNC Symbol;Acc:HGNC:9091]	protein_coding;retained_intron;nonsense_mediated_decay	7.73788	11.0857	10.4509	10.7654	3.19839	2.74277	3.08492e-07	1.94233e-05
ENSG00000171033	PKIA	ENST00000396418;ENST00000352966	GO:0000122(negative regulation of transcription by RNA polymerase II);GO:0004860(protein kinase inhibitor activity);GO:0004862(cAMP-dependent protein kinase inhibitor activity);GO:0005515(protein binding);GO:0005634(nucleus);GO:0005737(cytoplasm);GO:0006469(negative regulation of protein kinase activity);GO:0010389(regulation of G2/M transition of mitotic cell cycle);GO:0016301(kinase activity);G…	05034(Alcoholism);05034(Alcoholism)	cAMP-dependent protein kinase inhibitor alpha [Source:HGNC Symbol;Acc:HGNC:9017]	protein_coding	6.78416	8.3009	4.36054	4.5938	13.7789	15.3108	3.25873e-07	2.04318e-05
ENSG00000162631	NTNG1	ENST00000294649;ENST00000370068	GO:0005515(protein binding);GO:0005576(extracellular region);GO:0005886(plasma membrane);GO:0007399(nervous system development);GO:0007409(axonogenesis);GO:0009887(animal organ morphogenesis);GO:0009888(tissue development);GO:0010975(regulation of neuron projection development);GO:0016020(membrane);GO:0016477(cell migration);GO:0030154(cell differentiation);GO:0031225(anchored component of membra…	04360(Axon guidance);04514(Cell adhesion molecules);04514(Cell adhesion molecules)	netrin G1 [Source:HGNC Symbol;Acc:HGNC:23319]	retained_intron;protein_coding	0.0650152	0.0244813	0.0924461	0.0899106	0.555097	0.308142	3.46845e-07	2.15813e-05
ENSG00000112175	BMP5	ENST00000370830	GO:0001501(skeletal system development);GO:0001503(ossification);GO:0003272(endocardial cushion formation);GO:0003323(type B pancreatic cell development);GO:0003344(pericardium morphogenesis);GO:0005125(cytokine activity);GO:0005515(protein binding);GO:0005575(cellular_component);GO:0005576(extracellular region);GO:0005615(extracellular space);GO:0007165(signal transduction);GO:0007389(pattern sp…	04060(Cytokine-cytokine receptor interaction);04350(TGF-beta signaling pathway);04390(Hippo signaling pathway)	bone morphogenetic protein 5 [Source:HGNC Symbol;Acc:HGNC:1072]	protein_coding	2.07337	1.7717	0.57256	1.12605	4.21405	4.51756	3.47087e-07	2.15813e-05
ENSG00000182871	COL18A1	ENST00000651438;ENST00000342220;ENST00000359759;ENST00000473212;ENST00000459895;ENST00000355480	GO:0001525(angiogenesis);GO:0001886(endothelial cell morphogenesis);GO:0005201(extracellular matrix structural constituent);GO:0005515(protein binding);GO:0005576(extracellular region);GO:0005581(collagen trimer);GO:0005604(basement membrane);GO:0005615(extracellular space);GO:0005788(endoplasmic reticulum lumen);GO:0007155(cell adhesion);GO:0007601(visual perception);GO:0008285(negative regulati…	04974(Protein digestion and absorption);04974(Protein digestion and absorption)	collagen type XVIII alpha 1 chain [Source:HGNC Symbol;Acc:HGNC:2195]	protein_coding;retained_intron;processed_transcript	46.297	46.4364	35.0328	36.525	14.652	14.13	3.57477e-07	2.21215e-05
ENSG00000167617	CDC42EP5	ENST00000301200;ENST00000472703	GO:0005737(cytoplasm);GO:0005829(cytosol);GO:0005856(cytoskeleton);GO:0005886(plasma membrane);GO:0007254(JNK cascade);GO:0007266(Rho protein signal transduction);GO:0008360(regulation of cell shape);GO:0012505(endomembrane system);GO:0016020(membrane);GO:0030838(positive regulation of actin filament polymerization);GO:0031267(small GTPase binding);GO:0031274(positive regulation of pseudopodium a…	NA	CDC42 effector protein 5 [Source:HGNC Symbol;Acc:HGNC:17408]	protein_coding;processed_transcript	2.0549	0.524364	1.40009	0.493836	0	0	3.58727e-07	2.21215e-05
ENSG00000105472	CLEC11A	ENST00000250340	GO:0001503(ossification);GO:0005515(protein binding);GO:0005576(extracellular region);GO:0005615(extracellular space);GO:0005737(cytoplasm);GO:0007165(signal transduction);GO:0008083(growth factor activity);GO:0008284(positive regulation of cell population proliferation);GO:0030246(carbohydrate binding)	NA	C-type lectin domain containing 11A [Source:HGNC Symbol;Acc:HGNC:10576]	protein_coding	2.79325	1.56447	2.79639	2.01381	0.134128	0.274462	3.71064e-07	2.27496e-05
ENSG00000105329	TGFB1	ENST00000221930;ENST00000677934;ENST00000600196;ENST00000598758;ENST00000597453	GO:0000122(negative regulation of transcription by RNA polymerase II);GO:0000902(cell morphogenesis);GO:0001570(vasculogenesis);GO:0001657(ureteric bud development);GO:0001666(response to hypoxia);GO:0001763(morphogenesis of a branching structure);GO:0001775(cell activation);GO:0001837(epithelial to mesenchymal transition);GO:0001843(neural tube closure);GO:0002028(regulation of sodium ion transp…	04010(MAPK signaling pathway);04060(Cytokine-cytokine receptor interaction);04068(FoxO signaling pathway);04110(Cell cycle);04218(Cellular senescence);04350(TGF-beta signaling pathway);04380(Osteoclast differentiation);04390(Hippo signaling pathway);04659(Th17 cell differentiation);04672(Intestinal immune network for IgA production);04926(Relaxin signaling pathway);04932(Non-alcoholic fatty liver…	transforming growth factor beta 1 [Source:HGNC Symbol;Acc:HGNC:11766]	protein_coding;processed_transcript;retained_intron	33.4762	35.4777	22.626	22.6335	8.86452	11.7294	3.71949e-07	2.27496e-05
ENSG00000259768	ZFHX3-AS1	ENST00000563328;ENST00000702197;ENST00000653037;ENST00000689200;ENST00000692742;ENST00000692937;ENST00000701465;ENST00000701474;ENST00000686426;ENST00000687589;ENST00000668995;ENST00000700870	NA	NA	ZFHX3 antisense RNA 1 [Source:HGNC Symbol;Acc:HGNC:56033]	lncRNA	0.0960853	0.0752709	1.18107	0.203319	1.50574	1.03713	4.05518e-07	2.4702e-05
ENSG00000169251	NMD3	ENST00000351193;ENST00000472947;ENST00000493066;ENST00000460469;ENST00000463518;ENST00000468606;ENST00000476237;ENST00000460503;ENST00000473909;ENST00000478160	GO:0000055(ribosomal large subunit export from nucleus);GO:0003723(RNA binding);GO:0005634(nucleus);GO:0005654(nucleoplasm);GO:0005730(nucleolus);GO:0005737(cytoplasm);GO:0015031(protein transport);GO:0016020(membrane);GO:0030674(protein-macromolecule adaptor activity);GO:0032092(positive regulation of protein binding);GO:0043023(ribosomal large subunit binding);GO:1902680(positive regulation of …	03008(Ribosome biogenesis in eukaryotes);03013(RNA transport);03013(RNA transport)	NMD3 ribosome export adaptor [Source:HGNC Symbol;Acc:HGNC:24250]	protein_coding;retained_intron;processed_transcript	71.348	59.7154	128.609	73.3907	209.507	219.912	4.13201e-07	2.50681e-05
ENSG00000257594	GALNT4	ENST00000529983	GO:0000139(Golgi membrane);GO:0004653(polypeptide N-acetylgalactosaminyltransferase activity);GO:0005515(protein binding);GO:0005794(Golgi apparatus);GO:0006486(protein glycosylation);GO:0006493(protein O-linked glycosylation);GO:0016020(membrane);GO:0016021(integral component of membrane);GO:0016266(O-glycan processing);GO:0016740(transferase activity);GO:0016757(glycosyltransferase activity);GO…	00512(Mucin type O-glycan biosynthesis);00514(Other types of O-glycan biosynthesis);01100(Metabolic pathways)	polypeptide N-acetylgalactosaminyltransferase 4 [Source:HGNC Symbol;Acc:HGNC:4126]	protein_coding	2.96886	1.79225	4.08706	5.08935	10.1094	7.94806	4.21067e-07	2.53401e-05
ENSG00000268173	ENSG00000268173	ENST00000593731	NA	NA	novel protein, readthrough between PIK3R2 and IFI30	nonsense_mediated_decay	0.049241	1.68634	2.62267	2.97952	21.8853	20.2676	4.3289e-07	2.59474e-05
ENSG00000183734	ASCL2	ENST00000331289	GO:0000122(negative regulation of transcription by RNA polymerase II);GO:0000785(chromatin);GO:0000977(RNA polymerase II transcription regulatory region sequence-specific DNA binding);GO:0000978(RNA polymerase II cis-regulatory region sequence-specific DNA binding);GO:0000981(DNA-binding transcription factor activity, RNA polymerase II-specific);GO:0001227(DNA-binding transcription repressor acti…	NA	achaete-scute family bHLH transcription factor 2 [Source:HGNC Symbol;Acc:HGNC:739]	protein_coding	5.38935	3.77291	3.79669	2.29663	0.69095	0.552831	4.43452e-07	2.64089e-05
ENSG00000153443	UBALD1	ENST00000591897;ENST00000587649;ENST00000587615;ENST00000590965;ENST00000590891;ENST00000283474;ENST00000591113;ENST00000591401	GO:0005515(protein binding);GO:0005515(protein binding)	NA	UBA like domain containing 1 [Source:HGNC Symbol;Acc:HGNC:29576]	protein_coding	9.44904	8.18199	10.9666	8.86126	2.09803	3.09718	4.44113e-07	2.64089e-05
ENSG00000168685	IL7R	ENST00000303115;ENST00000511982;ENST00000509668;ENST00000514217;ENST00000505875	GO:0000018(regulation of DNA recombination);GO:0000902(cell morphogenesis);GO:0001782(B cell homeostasis);GO:0001913(T cell mediated cytotoxicity);GO:0001915(negative regulation of T cell mediated cytotoxicity);GO:0003823(antigen binding);GO:0004896(cytokine receptor activity);GO:0004917(interleukin-7 receptor activity);GO:0005515(protein binding);GO:0005576(extracellular region);GO:0005654(nucle…	04060(Cytokine-cytokine receptor interaction);04068(FoxO signaling pathway);04151(PI3K-Akt signaling pathway);04630(JAK-STAT signaling pathway);04640(Hematopoietic cell lineage);05200(Pathways in cancer);05340(Primary immunodeficiency);05340(Primary immunodeficiency)	interleukin 7 receptor [Source:HGNC Symbol;Acc:HGNC:6024]	protein_coding;retained_intron;nonsense_mediated_decay	0.293166	0.442967	0.21389	0.100636	0.0138205	0	4.48843e-07	2.65846e-05
ENSG00000158792	SPATA2L	ENST00000569918;ENST00000289805	GO:0005515(protein binding);GO:0005737(cytoplasm);GO:0005737(cytoplasm)	04217(Necroptosis);04217(Necroptosis)	spermatogenesis associated 2 like [Source:HGNC Symbol;Acc:HGNC:28393]	protein_coding	13.8398	13.4042	9.51367	9.17465	3.27613	3.90547	4.50693e-07	2.65891e-05
ENSG00000186081	KRT5	ENST00000252242;ENST00000547890;ENST00000552629;ENST00000551275;ENST00000549511;ENST00000552952;ENST00000548409	GO:0005200(structural constituent of cytoskeleton);GO:0005515(protein binding);GO:0005634(nucleus);GO:0005737(cytoplasm);GO:0005829(cytosol);GO:0005882(intermediate filament);GO:0008544(epidermis development);GO:0009612(response to mechanical stimulus);GO:0016020(membrane);GO:0030280(structural constituent of skin epidermis);GO:0030334(regulation of cell migration);GO:0031424(keratinization);GO:0…	NA	keratin 5 [Source:HGNC Symbol;Acc:HGNC:6442]	protein_coding;retained_intron	0.0543201	0	0.0344786	0.0828667	0.288108	1.72399	4.54908e-07	2.67325e-05
ENSG00000153234	NR4A2	ENST00000700231;ENST00000339562;ENST00000409572;ENST00000421709;ENST00000675870;ENST00000426264;ENST00000417764;ENST00000700229;ENST00000700228;ENST00000409108;ENST00000700230;ENST00000424077;ENST00000417972;ENST00000429376	GO:0000122(negative regulation of transcription by RNA polymerase II);GO:0000785(chromatin);GO:0000977(RNA polymerase II transcription regulatory region sequence-specific DNA binding);GO:0000978(RNA polymerase II cis-regulatory region sequence-specific DNA binding);GO:0000981(DNA-binding transcription factor activity, RNA polymerase II-specific);GO:0001228(DNA-binding transcription activator acti…	04925(Aldosterone synthesis and secretion);04928(Parathyroid hormone synthesis, secretion and action);04928(Parathyroid hormone synthesis, secretion and action)	nuclear receptor subfamily 4 group A member 2 [Source:HGNC Symbol;Acc:HGNC:7981]	protein_coding;nonsense_mediated_decay	2.70544	2.90299	4.74027	5.3286	9.90398	9.19709	4.6157e-07	2.70181e-05
ENSG00000167754	KLK5	ENST00000336334;ENST00000593428;ENST00000391809	GO:0002803(positive regulation of antibacterial peptide production);GO:0004252(serine-type endopeptidase activity);GO:0005515(protein binding);GO:0005576(extracellular region);GO:0005615(extracellular space);GO:0005829(cytosol);GO:0006508(proteolysis);GO:0008233(peptidase activity);GO:0008236(serine-type peptidase activity);GO:0008544(epidermis development);GO:0016787(hydrolase activity);GO:00226…	NA	kallikrein related peptidase 5 [Source:HGNC Symbol;Acc:HGNC:6366]	protein_coding	3.30371	2.98341	0.538518	0.600264	0.214453	0	4.6606e-07	2.71747e-05
ENSG00000156711	MAPK13	ENST00000211287;ENST00000373766;ENST00000373759;ENST00000476951;ENST00000490334	GO:0000165(MAPK cascade);GO:0000166(nucleotide binding);GO:0004672(protein kinase activity);GO:0004674(protein serine/threonine kinase activity);GO:0004707(MAP kinase activity);GO:0004712(protein serine/threonine/tyrosine kinase activity);GO:0005515(protein binding);GO:0005524(ATP binding);GO:0005634(nucleus);GO:0005737(cytoplasm);GO:0005829(cytosol);GO:0006468(protein phosphorylation);GO:0006970…	01522(Endocrine resistance);04010(MAPK signaling pathway);04015(Rap1 signaling pathway);04068(FoxO signaling pathway);04071(Sphingolipid signaling pathway);04114(Oocyte meiosis);04218(Cellular senescence);04261(Adrenergic signaling in cardiomyocytes);04370(VEGF signaling pathway);04380(Osteoclast differentiation);04550(Signaling pathways regulating pluripotency of stem cells);04611(Platelet activ…	mitogen-activated protein kinase 13 [Source:HGNC Symbol;Acc:HGNC:6875]	protein_coding;processed_transcript	0.215495	0.275002	0.413084	0.382281	1.34078	1.10415	5.08734e-07	2.9548e-05
ENSG00000276612	ENSG00000276612	ENST00000623476	NA	NA	novel protein	artifact	0	0	23.2203	0	15.5921	25.912	5.44383e-07	3.13753e-05
ENSG00000102316	MAGED2	ENST00000375058;ENST00000485483;ENST00000396224;ENST00000218439;ENST00000347546;ENST00000375053;ENST00000375068;ENST00000463787;ENST00000487463;ENST00000487482;ENST00000497484	GO:0000122(negative regulation of transcription by RNA polymerase II);GO:0005515(protein binding);GO:0005576(extracellular region);GO:0005634(nucleus);GO:0005654(nucleoplasm);GO:0005730(nucleolus);GO:0005829(cytosol);GO:0007565(female pregnancy);GO:0016020(membrane);GO:0031093(platelet alpha granule lumen);GO:0070294(renal sodium ion absorption);GO:0070294(renal sodium ion absorption)	NA	MAGE family member D2 [Source:HGNC Symbol;Acc:HGNC:16353]	protein_coding;processed_transcript	50.5735	46.7405	41.3543	51.7097	119.351	120.013	5.50111e-07	3.14779e-05
ENSG00000197483	ZNF628	ENST00000391718;ENST00000598519;ENST00000591164	GO:0000978(RNA polymerase II cis-regulatory region sequence-specific DNA binding);GO:0000981(DNA-binding transcription factor activity, RNA polymerase II-specific);GO:0003677(DNA binding);GO:0003700(DNA-binding transcription factor activity);GO:0005515(protein binding);GO:0005634(nucleus);GO:0006355(regulation of DNA-templated transcription);GO:0006357(regulation of transcription by RNA polymeras…	NA	zinc finger protein 628 [Source:HGNC Symbol;Acc:HGNC:28054]	protein_coding	2.59486	2.19995	2.11266	2.10567	0.506145	0.42965	5.50363e-07	3.14779e-05
ENSG00000243955	GSTA1	ENST00000334575;ENST00000476213	GO:0004364(glutathione transferase activity);GO:0004601(peroxidase activity);GO:0004602(glutathione peroxidase activity);GO:0004769(steroid delta-isomerase activity);GO:0005504(fatty acid binding);GO:0005737(cytoplasm);GO:0005829(cytosol);GO:0006629(lipid metabolic process);GO:0006693(prostaglandin metabolic process);GO:0006749(glutathione metabolic process);GO:0006805(xenobiotic metabolic proces…	00480(Glutathione metabolism);00980(Metabolism of xenobiotics by cytochrome P450);00982(Drug metabolism - cytochrome P450);00983(Drug metabolism - other enzymes);01100(Metabolic pathways);01524(Platinum drug resistance);05200(Pathways in cancer);05204(Chemical carcinogenesis);05225(Hepatocellular carcinoma);05418(Fluid shear stress and atherosclerosis);05418(Fluid shear stress and atherosclerosis)	glutathione S-transferase alpha 1 [Source:HGNC Symbol;Acc:HGNC:4626]	protein_coding;processed_transcript	6.12394	3.89679	2.30094	2.05233	13.1824	9.35252	5.85235e-07	3.32187e-05
ENSG00000113430	IRX4	ENST00000231357;ENST00000508261;ENST00000622814;ENST00000511126;ENST00000505790;ENST00000613726;ENST00000505938	GO:0000785(chromatin);GO:0000978(RNA polymerase II cis-regulatory region sequence-specific DNA binding);GO:0000981(DNA-binding transcription factor activity, RNA polymerase II-specific);GO:0003677(DNA binding);GO:0005515(protein binding);GO:0005634(nucleus);GO:0006355(regulation of DNA-templated transcription);GO:0006357(regulation of transcription by RNA polymerase II);GO:0007507(heart developme…	NA	iroquois homeobox 4 [Source:HGNC Symbol;Acc:HGNC:6129]	protein_coding;nonsense_mediated_decay;processed_transcript	4.62924	3.12161	3.01078	3.07228	0.780381	0.71659	5.8485e-07	3.32187e-05
ENSG00000081923	ATP8B1	ENST00000648908;ENST00000648467;ENST00000588255;ENST00000642462	GO:0000166(nucleotide binding);GO:0000287(magnesium ion binding);GO:0005215(transporter activity);GO:0005319(lipid transporter activity);GO:0005515(protein binding);GO:0005524(ATP binding);GO:0005654(nucleoplasm);GO:0005783(endoplasmic reticulum);GO:0005794(Golgi apparatus);GO:0005802(trans-Golgi network);GO:0005829(cytosol);GO:0005886(plasma membrane);GO:0005887(integral component of plasma memb…	NA	ATPase phospholipid transporting 8B1 [Source:HGNC Symbol;Acc:HGNC:3706]	protein_coding;nonsense_mediated_decay;retained_intron	2.05308	3.50089	3.08612	3.62312	12.0301	7.04032	6.12611e-07	3.46414e-05
ENSG00000196656	ENSG00000196656	ENST00000485827;ENST00000356247	NA	NA	ribosomal protein S26 (RPS26) pseudogene	transcribed_processed_pseudogene;processed_transcript	84.6673	49.9673	27.448	37.8825	17.3009	10.6675	6.41078e-07	3.61149e-05
ENSG00000280071	ENSG00000280071	ENST00000620528	NA	NA	novel protein, similar to chromosome 21 open reading frame 33 C21orf33	artifact	48.4845	30.5874	17.6883	27.2126	10.8942	7.47083	6.74935e-07	3.78798e-05
ENSG00000072133	RPS6KA6	ENST00000262752;ENST00000620340;ENST00000460730	GO:0000166(nucleotide binding);GO:0000287(magnesium ion binding);GO:0001650(fibrillar center);GO:0004672(protein kinase activity);GO:0004674(protein serine/threonine kinase activity);GO:0004711(ribosomal protein S6 kinase activity);GO:0004712(protein serine/threonine/tyrosine kinase activity);GO:0005515(protein binding);GO:0005524(ATP binding);GO:0005634(nucleus);GO:0005654(nucleoplasm);GO:000573…	04010(MAPK signaling pathway);04114(Oocyte meiosis);04150(mTOR signaling pathway);04714(Thermogenesis);04720(Long-term potentiation);04722(Neurotrophin signaling pathway);04914(Progesterone-mediated oocyte maturation);04931(Insulin resistance);05135(Yersinia infection);05135(Yersinia infection)	ribosomal protein S6 kinase A6 [Source:HGNC Symbol;Acc:HGNC:10435]	protein_coding;processed_transcript	0.162864	0.110044	0.355943	0.250367	0.980786	0.690863	6.92551e-07	3.87234e-05
ENSG00000186642	PDE2A	ENST00000334456;ENST00000538749;ENST00000536918;ENST00000441209;ENST00000542223;ENST00000420501;ENST00000444035;ENST00000544239;ENST00000540345	GO:0000122(negative regulation of transcription by RNA polymerase II);GO:0000166(nucleotide binding);GO:0000287(magnesium ion binding);GO:0003170(heart valve development);GO:0003281(ventricular septum development);GO:0004114(3',5'-cyclic-nucleotide phosphodiesterase activity);GO:0004115(3',5'-cyclic-AMP phosphodiesterase activity);GO:0004118(cGMP-stimulated cyclic-nucleotide phosphodiesterase act…	00230(Purine metabolism);01100(Metabolic pathways);04022(cGMP-PKG signaling pathway);04740(Olfactory transduction);04925(Aldosterone synthesis and secretion);05032(Morphine addiction);05032(Morphine addiction)	phosphodiesterase 2A [Source:HGNC Symbol;Acc:HGNC:8777]	protein_coding;retained_intron	0.405793	0.207674	0.635751	0.807465	0.0921277	0.0425329	7.29563e-07	4.06413e-05
ENSG00000167685	ZNF444	ENST00000592949;ENST00000337080;ENST00000587236;ENST00000588358;ENST00000587195;ENST00000591564;ENST00000586123;ENST00000587664;ENST00000588203;ENST00000592171;ENST00000593100	GO:0000978(RNA polymerase II cis-regulatory region sequence-specific DNA binding);GO:0000981(DNA-binding transcription factor activity, RNA polymerase II-specific);GO:0003677(DNA binding);GO:0005515(protein binding);GO:0005634(nucleus);GO:0006357(regulation of transcription by RNA polymerase II);GO:0046872(metal ion binding);GO:1990837(sequence-specific double-stranded DNA binding);GO:1990837(seq…	NA	zinc finger protein 444 [Source:HGNC Symbol;Acc:HGNC:16052]	protein_coding;retained_intron;processed_transcript	6.26733	4.49118	5.48655	3.50626	1.21348	1.49997	7.40874e-07	4.10417e-05
ENSG00000133265	HSPBP1	ENST00000255631;ENST00000587922;ENST00000588971;ENST00000593263;ENST00000433386;ENST00000587551;ENST00000585927	GO:0000774(adenyl-nucleotide exchange factor activity);GO:0004857(enzyme inhibitor activity);GO:0005515(protein binding);GO:0006457(protein folding);GO:0031398(positive regulation of protein ubiquitination);GO:0031625(ubiquitin protein ligase binding);GO:0032436(positive regulation of proteasomal ubiquitin-dependent protein catabolic process);GO:0043086(negative regulation of catalytic activity);…	04141(Protein processing in endoplasmic reticulum);04141(Protein processing in endoplasmic reticulum)	HSPA (Hsp70) binding protein 1 [Source:HGNC Symbol;Acc:HGNC:24989]	protein_coding	21.8744	18.1052	15.3682	12.4403	5.89214	5.31114	7.4223e-07	4.10417e-05
ENSG00000120833	SOCS2	ENST00000340600;ENST00000549206;ENST00000549122;ENST00000536696;ENST00000551556;ENST00000548537;ENST00000547229;ENST00000622746;ENST00000548091;ENST00000551883	GO:0001558(regulation of cell growth);GO:0005131(growth hormone receptor binding);GO:0005159(insulin-like growth factor receptor binding);GO:0005515(protein binding);GO:0005737(cytoplasm);GO:0005829(cytosol);GO:0005942(phosphatidylinositol 3-kinase complex);GO:0007259(receptor signaling pathway via JAK-STAT);GO:0007595(lactation);GO:0008269(JAK pathway signal transduction adaptor activity);GO:000…	04630(JAK-STAT signaling pathway);04910(Insulin signaling pathway);04917(Prolactin signaling pathway);04930(Type II diabetes mellitus);04935(Growth hormone synthesis, secretion and action);04935(Growth hormone synthesis, secretion and action)	suppressor of cytokine signaling 2 [Source:HGNC Symbol;Acc:HGNC:19382]	protein_coding	3.30708	2.99375	2.79061	1.49361	6.56608	8.86379	7.73573e-07	4.25652e-05
ENSG00000139329	LUM	ENST00000266718	GO:0005201(extracellular matrix structural constituent);GO:0005515(protein binding);GO:0005518(collagen binding);GO:0005576(extracellular region);GO:0005583(fibrillar collagen trimer);GO:0005615(extracellular space);GO:0005796(Golgi lumen);GO:0007601(visual perception);GO:0030021(extracellular matrix structural constituent conferring compression resistance);GO:0030199(collagen fibril organization…	05205(Proteoglycans in cancer)	lumican [Source:HGNC Symbol;Acc:HGNC:6724]	protein_coding	0.769351	0.642839	0.567727	0.2415	0.028079	0	7.75462e-07	4.25652e-05
ENSG00000170819	BFSP2	ENST00000511434;ENST00000302334;ENST00000503047;ENST00000510039	GO:0005198(structural molecule activity);GO:0005200(structural constituent of cytoskeleton);GO:0005212(structural constituent of eye lens);GO:0005515(protein binding);GO:0005737(cytoplasm);GO:0005856(cytoskeleton);GO:0005882(intermediate filament);GO:0005886(plasma membrane);GO:0005938(cell cortex);GO:0007010(cytoskeleton organization);GO:0007601(visual perception);GO:0016020(membrane);GO:0045104…	NA	beaded filament structural protein 2 [Source:HGNC Symbol;Acc:HGNC:1041]	processed_transcript;protein_coding;retained_intron	4.05939	3.54483	4.8908	2.90455	0.662013	0.796352	8.53306e-07	4.66671e-05
ENSG00000184564	SLITRK6	ENST00000647374;ENST00000645642	GO:0001964(startle response);GO:0002088(lens development in camera-type eye);GO:0002093(auditory receptor cell morphogenesis);GO:0005515(protein binding);GO:0005886(plasma membrane);GO:0005887(integral component of plasma membrane);GO:0007409(axonogenesis);GO:0007416(synapse assembly);GO:0007601(visual perception);GO:0007605(sensory perception of sound);GO:0008344(adult locomotory behavior);GO:00…	NA	SLIT and NTRK like family member 6 [Source:HGNC Symbol;Acc:HGNC:23503]	protein_coding;processed_transcript	3.36153	3.60492	5.65286	8.29684	11.7347	12.0007	8.69311e-07	4.72739e-05
ENSG00000235217	TSPY26P	ENST00000565928;ENST00000476365	NA	NA	testis specific protein Y-linked 26, pseudogene [Source:HGNC Symbol;Acc:HGNC:16256]	processed_transcript;transcribed_processed_pseudogene	0.0625572	0.140583	0.187996	0.148981	0.938288	0.814335	8.7071e-07	4.72739e-05
ENSG00000259040	BLOC1S5-TXNDC5	ENST00000439343	GO:0030133(transport vesicle);GO:0031083(BLOC-1 complex)	NA	BLOC1S5-TXNDC5 readthrough (NMD candidate) [Source:HGNC Symbol;Acc:HGNC:42001]	nonsense_mediated_decay	10.2866	6.68569	0	19.5645	0	0	9.48182e-07	5.12943e-05
ENSG00000073756	PTGS2	ENST00000680451;ENST00000466691;ENST00000367468	GO:0001516(prostaglandin biosynthetic process);GO:0001525(angiogenesis);GO:0004601(peroxidase activity);GO:0004666(prostaglandin-endoperoxide synthase activity);GO:0005515(protein binding);GO:0005634(nucleus);GO:0005637(nuclear inner membrane);GO:0005640(nuclear outer membrane);GO:0005737(cytoplasm);GO:0005783(endoplasmic reticulum);GO:0005788(endoplasmic reticulum lumen);GO:0005789(endoplasmic r…	00590(Arachidonic acid metabolism);01100(Metabolic pathways);04064(NF-kappa B signaling pathway);04370(VEGF signaling pathway);04625(C-type lectin receptor signaling pathway);04657(IL-17 signaling pathway);04668(TNF signaling pathway);04723(Retrograde endocannabinoid signaling);04726(Serotonergic synapse);04913(Ovarian steroidogenesis);04921(Oxytocin signaling pathway);04923(Regulation of lipolys…	prostaglandin-endoperoxide synthase 2 [Source:HGNC Symbol;Acc:HGNC:9605]	protein_coding;retained_intron	0.534264	0.752503	0.61797	0.148365	0	0.0299267	9.69946e-07	5.22829e-05
ENSG00000177108	ZDHHC22	ENST00000319374;ENST00000555389	GO:0000139(Golgi membrane);GO:0005515(protein binding);GO:0005783(endoplasmic reticulum);GO:0005789(endoplasmic reticulum membrane);GO:0005794(Golgi apparatus);GO:0005886(plasma membrane);GO:0006612(protein targeting to membrane);GO:0016020(membrane);GO:0016021(integral component of membrane);GO:0016409(palmitoyltransferase activity);GO:0016740(transferase activity);GO:0016746(acyltransferase act…	NA	zinc finger DHHC-type palmitoyltransferase 22 [Source:HGNC Symbol;Acc:HGNC:20106]	protein_coding	1.83169	2.26503	1.2256	2.21676	6.64736	5.93248	9.82741e-07	5.25942e-05
ENSG00000130522	JUND	ENST00000252818	GO:0000122(negative regulation of transcription by RNA polymerase II);GO:0000785(chromatin);GO:0000976(transcription cis-regulatory region binding);GO:0000978(RNA polymerase II cis-regulatory region sequence-specific DNA binding);GO:0000981(DNA-binding transcription factor activity, RNA polymerase II-specific);GO:0001221(transcription coregulator binding);GO:0001228(DNA-binding transcription acti…	04010(MAPK signaling pathway);04380(Osteoclast differentiation);04657(IL-17 signaling pathway);04928(Parathyroid hormone synthesis, secretion and action)	JunD proto-oncogene, AP-1 transcription factor subunit [Source:HGNC Symbol;Acc:HGNC:6206]	protein_coding	28.546	25.2256	27.1195	22.3387	4.01246	8.89657	9.80716e-07	5.25942e-05
ENSG00000214022	REPIN1	ENST00000425389;ENST00000479668;ENST00000489432;ENST00000397281;ENST00000473391;ENST00000444957;ENST00000486714;ENST00000518514;ENST00000487455;ENST00000466559;ENST00000522266;ENST00000482680;ENST00000475514;ENST00000495535;ENST00000469309;ENST00000519397;ENST00000488943;ENST00000467980;ENST00000518462	GO:0003677(DNA binding);GO:0003723(RNA binding);GO:0005515(protein binding);GO:0005634(nucleus);GO:0005654(nucleoplasm);GO:0005664(nuclear origin of replication recognition complex);GO:0005694(chromosome);GO:0006260(DNA replication);GO:0006357(regulation of transcription by RNA polymerase II);GO:0043035(chromatin insulator sequence binding);GO:0046872(metal ion binding);GO:0046872(metal ion bindi…	NA	replication initiator 1 [Source:HGNC Symbol;Acc:HGNC:17922]	protein_coding;retained_intron;nonsense_mediated_decay;processed_transcript	41.7964	50.1678	37.5174	41.1244	15.4002	14.6065	1.0149e-06	5.4122e-05
ENSG00000166780	BMERB1	ENST00000300006;ENST00000566490;ENST00000452191;ENST00000561692;ENST00000565857;ENST00000570249;ENST00000567550;ENST00000564389;ENST00000561813	GO:0005515(protein binding);GO:0007019(microtubule depolymerization);GO:0007026(negative regulation of microtubule depolymerization);GO:0015630(microtubule cytoskeleton);GO:0021814(cell motility involved in cerebral cortex radial glia guided migration);GO:0021822(negative regulation of cell motility involved in cerebral cortex radial glia guided migration);GO:0021822(negative regulation of cell m…	NA	bMERB domain containing 1 [Source:HGNC Symbol;Acc:HGNC:19213]	protein_coding;nonsense_mediated_decay;retained_intron	0.902975	0.789484	0.637766	1.2	3.24434	3.59898	1.02799e-06	5.46255e-05
ENSG00000162069	BICDL2	ENST00000389347;ENST00000572240;ENST00000572449;ENST00000573514;ENST00000576826;ENST00000642419	GO:0005515(protein binding);GO:0005737(cytoplasm);GO:0031267(small GTPase binding);GO:0047496(vesicle transport along microtubule);GO:0055107(Golgi to secretory granule transport);GO:0055107(Golgi to secretory granule transport)	NA	BICD family like cargo adaptor 2 [Source:HGNC Symbol;Acc:HGNC:33584]	protein_coding;retained_intron	6.79873	5.84961	9.42548	7.04972	2.08137	2.46618	1.053e-06	5.5757e-05
ENSG00000196126	HLA-DRB1	ENST00000696611;ENST00000360004;ENST00000696612;ENST00000696613;ENST00000696610	GO:0000139(Golgi membrane);GO:0001772(immunological synapse);GO:0001916(positive regulation of T cell mediated cytotoxicity);GO:0001934(positive regulation of protein phosphorylation);GO:0002250(adaptive immune response);GO:0002376(immune system process);GO:0002437(inflammatory response to antigenic stimulus);GO:0002469(myeloid dendritic cell antigen processing and presentation);GO:0002491(antige…	04145(Phagosome);04514(Cell adhesion molecules);04612(Antigen processing and presentation);04640(Hematopoietic cell lineage);04658(Th1 and Th2 cell differentiation);04659(Th17 cell differentiation);04672(Intestinal immune network for IgA production);04940(Type I diabetes mellitus);05140(Leishmaniasis);05145(Toxoplasmosis);05150(Staphylococcus aureus infection);05152(Tuberculosis);05164(Influenza …	major histocompatibility complex, class II, DR beta 1 [Source:HGNC Symbol;Acc:HGNC:4948]	processed_transcript;protein_coding;retained_intron;nonsense_mediated_decay	20.6134	12.1272	7.06718	4.69429	4.68672	4.85603	1.10907e-06	5.85192e-05
ENSG00000254251	ENSG00000254251	ENST00000517884	NA	NA	novel transcript	lncRNA	10.9586	5.59842	2.21433	1.18189	9.78429	12.1139	1.14799e-06	6.03603e-05
ENSG00000164411	GJB7	ENST00000525899;ENST00000442973;ENST00000369576	GO:0005243(gap junction channel activity);GO:0005886(plasma membrane);GO:0005921(gap junction);GO:0005922(connexin complex);GO:0007154(cell communication);GO:0007267(cell-cell signaling);GO:0016020(membrane);GO:0016021(integral component of membrane);GO:0030054(cell junction);GO:0055085(transmembrane transport);GO:0055085(transmembrane transport)	NA	gap junction protein beta 7 [Source:HGNC Symbol;Acc:HGNC:16690]	protein_coding;processed_transcript	0.64905	0.690735	2.02256	1.76653	0.287364	0.267791	1.18535e-06	6.21067e-05
ENSG00000174276	ZNHIT2	ENST00000310597	GO:0005515(protein binding);GO:0046872(metal ion binding)	NA	zinc finger HIT-type containing 2 [Source:HGNC Symbol;Acc:HGNC:1177]	protein_coding	15.5595	10.3913	13.4777	8.84487	3.23666	2.09015	1.20197e-06	6.27581e-05
ENSG00000108106	UBE2S	ENST00000264552;ENST00000589978;ENST00000587845;ENST00000592570	GO:0000166(nucleotide binding);GO:0000209(protein polyubiquitination);GO:0004842(ubiquitin-protein transferase activity);GO:0005515(protein binding);GO:0005524(ATP binding);GO:0005634(nucleus);GO:0005654(nucleoplasm);GO:0005680(anaphase-promoting complex);GO:0005829(cytosol);GO:0006511(ubiquitin-dependent protein catabolic process);GO:0007049(cell cycle);GO:0010458(exit from mitosis);GO:0010994(f…	04120(Ubiquitin mediated proteolysis);04120(Ubiquitin mediated proteolysis)	ubiquitin conjugating enzyme E2 S [Source:HGNC Symbol;Acc:HGNC:17895]	protein_coding;processed_transcript	72.9977	50.0651	65.0189	31.9235	12.9959	16.7482	1.25178e-06	6.51316e-05
ENSG00000142173	COL6A2	ENST00000310645;ENST00000300527;ENST00000397763;ENST00000409416;ENST00000460886;ENST00000485591;ENST00000413758	GO:0005515(protein binding);GO:0005518(collagen binding);GO:0005576(extracellular region);GO:0005581(collagen trimer);GO:0005615(extracellular space);GO:0005788(endoplasmic reticulum lumen);GO:0007155(cell adhesion);GO:0009749(response to glucose);GO:0016020(membrane);GO:0030020(extracellular matrix structural constituent conferring tensile strength);GO:0031012(extracellular matrix);GO:0032991(pr…	04151(PI3K-Akt signaling pathway);04510(Focal adhesion);04512(ECM-receptor interaction);04974(Protein digestion and absorption);05165(Human papillomavirus infection);05165(Human papillomavirus infection)	collagen type VI alpha 2 chain [Source:HGNC Symbol;Acc:HGNC:2212]	protein_coding;processed_transcript;retained_intron	12.054	11.5614	10.6642	9.26452	3.5946	3.99108	1.25664e-06	6.51584e-05
ENSG00000168101	NUDT16L1	ENST00000586536;ENST00000304301;ENST00000405142;ENST00000590460	GO:0003723(RNA binding);GO:0005515(protein binding);GO:0005634(nucleus);GO:0030515(snoRNA binding);GO:2001033(negative regulation of double-strand break repair via nonhomologous end joining);GO:2001033(negative regulation of double-strand break repair via nonhomologous end joining)	05205(Proteoglycans in cancer);05205(Proteoglycans in cancer)	nudix hydrolase 16 like 1 [Source:HGNC Symbol;Acc:HGNC:28154]	protein_coding	29.3147	25.8495	33.1587	25.2407	8.65542	10.213	1.26389e-06	6.53082e-05
ENSG00000163701	IL17RE	ENST00000383814;ENST00000454190;ENST00000383815;ENST00000434065;ENST00000480244;ENST00000483258;ENST00000489181;ENST00000461534;ENST00000444427;ENST00000421412	GO:0005515(protein binding);GO:0005576(extracellular region);GO:0005737(cytoplasm);GO:0005886(plasma membrane);GO:0006954(inflammatory response);GO:0016020(membrane);GO:0016021(integral component of membrane);GO:0019221(cytokine-mediated signaling pathway);GO:0030368(interleukin-17 receptor activity);GO:0030368(interleukin-17 receptor activity)	04060(Cytokine-cytokine receptor interaction);04657(IL-17 signaling pathway);04657(IL-17 signaling pathway)	interleukin 17 receptor E [Source:HGNC Symbol;Acc:HGNC:18439]	protein_coding;nonsense_mediated_decay;retained_intron	3.20573	2.20825	1.48675	1.43456	0.355826	0.605853	1.27481e-06	6.5646e-05
ENSG00000106541	AGR2	ENST00000419304;ENST00000412973;ENST00000401412;ENST00000489523;ENST00000468419;ENST00000450569;ENST00000486219	GO:0002162(dystroglycan binding);GO:0005154(epidermal growth factor receptor binding);GO:0005515(protein binding);GO:0005576(extracellular region);GO:0005615(extracellular space);GO:0005783(endoplasmic reticulum);GO:0010628(positive regulation of gene expression);GO:0010811(positive regulation of cell-substrate adhesion);GO:0042802(identical protein binding);GO:0045742(positive regulation of epid…	NA	anterior gradient 2, protein disulphide isomerase family member [Source:HGNC Symbol;Acc:HGNC:328]	protein_coding;retained_intron;processed_transcript	179.638	114.437	154.039	120.407	330.778	409.797	1.29637e-06	6.65276e-05
ENSG00000172461	FUT9	ENST00000302103	GO:0000139(Golgi membrane);GO:0005515(protein binding);GO:0005794(Golgi apparatus);GO:0005802(trans-Golgi network);GO:0005975(carbohydrate metabolic process);GO:0006486(protein glycosylation);GO:0006487(protein N-linked glycosylation);GO:0006493(protein O-linked glycosylation);GO:0006629(lipid metabolic process);GO:0006688(glycosphingolipid biosynthetic process);GO:0007399(nervous system developm…	00515(Mannose type O-glycan biosynthesis);00601(Glycosphingolipid biosynthesis - lacto and neolacto series);00603(Glycosphingolipid biosynthesis - globo and isoglobo series);01100(Metabolic pathways)	fucosyltransferase 9 [Source:HGNC Symbol;Acc:HGNC:4020]	protein_coding	0.127021	0.124471	0.269987	0.605471	1.0969	0.590644	1.35442e-06	6.92697e-05
ENSG00000132437	DDC	ENST00000494914;ENST00000495320;ENST00000357936;ENST00000444124	GO:0003824(catalytic activity);GO:0004058(aromatic-L-amino-acid decarboxylase activity);GO:0005515(protein binding);GO:0005737(cytoplasm);GO:0005829(cytosol);GO:0006520(cellular amino acid metabolic process);GO:0006584(catecholamine metabolic process);GO:0007623(circadian rhythm);GO:0008021(synaptic vesicle);GO:0009636(response to toxic substance);GO:0010259(multicellular organism aging);GO:00158…	00350(Tyrosine metabolism);00360(Phenylalanine metabolism);00380(Tryptophan metabolism);01100(Metabolic pathways);04726(Serotonergic synapse);04728(Dopaminergic synapse);05030(Cocaine addiction);05031(Amphetamine addiction);05034(Alcoholism);05034(Alcoholism)	dopa decarboxylase [Source:HGNC Symbol;Acc:HGNC:2719]	retained_intron;processed_transcript;protein_coding	0	0	0.110246	0.00857383	0.514817	0.311675	1.38448e-06	7.0566e-05
ENSG00000132207	SLX1A	ENST00000251303;ENST00000564268;ENST00000345535;ENST00000563616;ENST00000565081	GO:0000724(double-strand break repair via homologous recombination);GO:0004518(nuclease activity);GO:0004519(endonuclease activity);GO:0005515(protein binding);GO:0005634(nucleus);GO:0005654(nucleoplasm);GO:0006281(DNA repair);GO:0006310(DNA recombination);GO:0006974(cellular response to DNA damage stimulus);GO:0008821(crossover junction endodeoxyribonuclease activity);GO:0010792(DNA double-stran…	03460(Fanconi anemia pathway);03460(Fanconi anemia pathway)	SLX1 homolog A, structure-specific endonuclease subunit [Source:HGNC Symbol;Acc:HGNC:20922]	protein_coding;retained_intron	6.08908	6.41765	6.32178	5.87851	0.672814	1.73438	1.46577e-06	7.44561e-05
ENSG00000172137	CALB2	ENST00000302628;ENST00000467817;ENST00000562305;ENST00000349553	GO:0005509(calcium ion binding);GO:0005634(nucleus);GO:0005829(cytosol);GO:0005921(gap junction);GO:0030425(dendrite);GO:0043005(neuron projection);GO:0043195(terminal bouton);GO:0045202(synapse);GO:0046872(metal ion binding);GO:0051480(regulation of cytosolic calcium ion concentration);GO:0098688(parallel fiber to Purkinje cell synapse);GO:0098793(presynapse);GO:0099509(regulation of presynaptic…	NA	calbindin 2 [Source:HGNC Symbol;Acc:HGNC:1435]	protein_coding;retained_intron	1.82761	1.4579	0.475665	0.417295	3.1496	2.78031	1.6471e-06	8.33843e-05
ENSG00000129932	DOHH	ENST00000427575;ENST00000671696;ENST00000672935;ENST00000673168	GO:0004497(monooxygenase activity);GO:0005506(iron ion binding);GO:0005515(protein binding);GO:0005575(cellular_component);GO:0005829(cytosol);GO:0008612(peptidyl-lysine modification to peptidyl-hypusine);GO:0016491(oxidoreductase activity);GO:0019135(deoxyhypusine monooxygenase activity);GO:0046872(metal ion binding);GO:0046872(metal ion binding)	NA	deoxyhypusine hydroxylase [Source:HGNC Symbol;Acc:HGNC:28662]	protein_coding;retained_intron	4.14351	3.99251	4.15144	2.26549	0.509054	0.827782	1.72223e-06	8.67814e-05
ENSG00000123989	CHPF	ENST00000243776;ENST00000693236;ENST00000373891;ENST00000688634;ENST00000691864;ENST00000535926	GO:0000139(Golgi membrane);GO:0005737(cytoplasm);GO:0005739(mitochondrion);GO:0005759(mitochondrial matrix);GO:0005794(Golgi apparatus);GO:0005829(cytosol);GO:0008376(acetylgalactosaminyltransferase activity);GO:0016020(membrane);GO:0016021(integral component of membrane);GO:0016740(transferase activity);GO:0016757(glycosyltransferase activity);GO:0030206(chondroitin sulfate biosynthetic process)…	00532(Glycosaminoglycan biosynthesis - chondroitin sulfate / dermatan sulfate);01100(Metabolic pathways);01100(Metabolic pathways)	chondroitin polymerizing factor [Source:HGNC Symbol;Acc:HGNC:24291]	protein_coding;retained_intron;nonsense_mediated_decay	31.4308	28.622	19.6575	17.4215	9.60045	10.0996	1.72578e-06	8.67814e-05
ENSG00000213638	ADAT3	ENST00000329478;ENST00000454697	GO:0003824(catalytic activity);GO:0003824(catalytic activity)	NA	adenosine deaminase tRNA specific 3 [Source:HGNC Symbol;Acc:HGNC:25151]	protein_coding	1.25391	1.05575	1.00736	1.14465	0.121863	0.120203	1.75881e-06	8.81462e-05
ENSG00000160888	IER2	ENST00000588173;ENST00000292433;ENST00000587885	GO:0003677(DNA binding);GO:0005515(protein binding);GO:0005634(nucleus);GO:0005654(nucleoplasm);GO:0005737(cytoplasm);GO:0030182(neuron differentiation);GO:0045944(positive regulation of transcription by RNA polymerase II);GO:0048870(cell motility);GO:0071774(response to fibroblast growth factor);GO:0071774(response to fibroblast growth factor)	NA	immediate early response 2 [Source:HGNC Symbol;Acc:HGNC:28871]	protein_coding	28.6593	21.5007	25.1556	22.535	8.1741	8.62476	1.84138e-06	9.1977e-05
ENSG00000106003	LFNG	ENST00000222725;ENST00000359574;ENST00000493850	GO:0000139(Golgi membrane);GO:0001541(ovarian follicle development);GO:0001756(somitogenesis);GO:0002315(marginal zone B cell differentiation);GO:0005576(extracellular region);GO:0005794(Golgi apparatus);GO:0007386(compartment pattern specification);GO:0007389(pattern specification process);GO:0008375(acetylglucosaminyltransferase activity);GO:0008593(regulation of Notch signaling pathway);GO:000…	00514(Other types of O-glycan biosynthesis);04330(Notch signaling pathway);05165(Human papillomavirus infection);05165(Human papillomavirus infection)	LFNG O-fucosylpeptide 3-beta-N-acetylglucosaminyltransferase [Source:HGNC Symbol;Acc:HGNC:6560]	protein_coding;retained_intron	16.1976	13.9466	11.9135	10.8918	4.27456	4.93958	1.85001e-06	9.21009e-05
ENSG00000287952	ENSG00000287952	ENST00000662759	NA	NA	novel transcript, antisense to COX6C	lncRNA	1.06523	0.632914	0.500551	0.260376	2.97334	2.70439	1.87338e-06	9.29559e-05
ENSG00000160932	LY6E	ENST00000292494;ENST00000521003;ENST00000521182;ENST00000520466;ENST00000429120;ENST00000522024;ENST00000522528;ENST00000521699;ENST00000519546;ENST00000522971;ENST00000519611;ENST00000520531;ENST00000519615;ENST00000517503;ENST00000523847	GO:0005515(protein binding);GO:0005576(extracellular region);GO:0005886(plasma membrane);GO:0007166(cell surface receptor signaling pathway);GO:0016020(membrane);GO:0030550(acetylcholine receptor inhibitor activity);GO:0031225(anchored component of membrane);GO:0045202(synapse);GO:0046597(negative regulation of viral entry into host cell);GO:2000272(negative regulation of signaling receptor activ…	NA	lymphocyte antigen 6 family member E [Source:HGNC Symbol;Acc:HGNC:6727]	protein_coding;processed_transcript	308.622	230.333	237.528	178.677	89.2937	79.7897	1.87979e-06	9.29656e-05
ENSG00000133083	DCLK1	ENST00000360631;ENST00000460982;ENST00000379892;ENST00000615680;ENST00000486239;ENST00000379893	GO:0000166(nucleotide binding);GO:0001764(neuron migration);GO:0004672(protein kinase activity);GO:0004674(protein serine/threonine kinase activity);GO:0004712(protein serine/threonine/tyrosine kinase activity);GO:0005515(protein binding);GO:0005524(ATP binding);GO:0005887(integral component of plasma membrane);GO:0006468(protein phosphorylation);GO:0007399(nervous system development);GO:0007409(…	NA	doublecortin like kinase 1 [Source:HGNC Symbol;Acc:HGNC:2700]	protein_coding;processed_transcript	1.47659	1.89161	1.86217	3.15663	5.60585	5.17704	1.96945e-06	9.64281e-05
ENSG00000145147	SLIT2	ENST00000504154;ENST00000509099;ENST00000509941;ENST00000508541	GO:0001657(ureteric bud development);GO:0001933(negative regulation of protein phosphorylation);GO:0002042(cell migration involved in sprouting angiogenesis);GO:0002689(negative regulation of leukocyte chemotaxis);GO:0003180(aortic valve morphogenesis);GO:0003184(pulmonary valve morphogenesis);GO:0005095(GTPase inhibitor activity);GO:0005509(calcium ion binding);GO:0005515(protein binding);GO:000…	04360(Axon guidance);04360(Axon guidance)	slit guidance ligand 2 [Source:HGNC Symbol;Acc:HGNC:11086]	protein_coding;retained_intron	0.0711206	0.0787436	0.0434501	0.0714983	0.420345	0.297369	1.97372e-06	9.64281e-05
ENSG00000175879	HOXD8	ENST00000313173;ENST00000450510;ENST00000429017	GO:0000122(negative regulation of transcription by RNA polymerase II);GO:0000785(chromatin);GO:0000977(RNA polymerase II transcription regulatory region sequence-specific DNA binding);GO:0000981(DNA-binding transcription factor activity, RNA polymerase II-specific);GO:0001228(DNA-binding transcription activator activity, RNA polymerase II-specific);GO:0003677(DNA binding);GO:0003700(DNA-binding t…	NA	homeobox D8 [Source:HGNC Symbol;Acc:HGNC:5139]	protein_coding	0.416771	0.43437	0.956843	0.539045	2.4308	2.31262	1.97554e-06	9.64281e-05
ENSG00000217576	ENSG00000217576	ENST00000451298	NA	NA	novel transcript	lncRNA	2.42203	0	3.32255	1.21416	0	0	2.00057e-06	9.73329e-05
ENSG00000184845	DRD1	ENST00000393752	GO:0001588(dopamine neurotransmitter receptor activity, coupled via Gs);GO:0001659(temperature homeostasis);GO:0001661(conditioned taste aversion);GO:0001662(behavioral fear response);GO:0001764(neuron migration);GO:0001932(regulation of protein phosphorylation);GO:0001963(synaptic transmission, dopaminergic);GO:0001975(response to amphetamine);GO:0004930(G protein-coupled receptor activity);GO:0…	04020(Calcium signaling pathway);04024(cAMP signaling pathway);04080(Neuroactive ligand-receptor interaction);04540(Gap junction);04728(Dopaminergic synapse);05012(Parkinson disease);05030(Cocaine addiction);05031(Amphetamine addiction);05032(Morphine addiction);05034(Alcoholism)	dopamine receptor D1 [Source:HGNC Symbol;Acc:HGNC:3020]	protein_coding	0.01383	0	0.075419	0.052475	0.236912	0.537113	2.06459e-06	0.000100123
ENSG00000279198	ENSG00000279198	ENST00000624324	NA	NA	TEC	TEC	0.595	1.02184	0.893835	1.28079	0.12818	0.037727	2.07659e-06	0.00010038
ENSG00000185477	GPRIN3	ENST00000609438;ENST00000333209	GO:0005886(plasma membrane);GO:0031175(neuron projection development);GO:0031175(neuron projection development)	NA	GPRIN family member 3 [Source:HGNC Symbol;Acc:HGNC:27733]	protein_coding	0.0187741	0.0483282	0	0.0141042	0.224536	0.200015	2.09126e-06	0.000100764
ENSG00000114270	COL7A1	ENST00000328333;ENST00000487017;ENST00000462475;ENST00000467985;ENST00000465238;ENST00000466591;ENST00000459756;ENST00000470076;ENST00000474432;ENST00000681320	GO:0004867(serine-type endopeptidase inhibitor activity);GO:0005515(protein binding);GO:0005576(extracellular region);GO:0005581(collagen trimer);GO:0005590(collagen type VII trimer);GO:0005604(basement membrane);GO:0005615(extracellular space);GO:0005788(endoplasmic reticulum lumen);GO:0007155(cell adhesion);GO:0008544(epidermis development);GO:0010466(negative regulation of peptidase activity);…	04974(Protein digestion and absorption);04974(Protein digestion and absorption)	collagen type VII alpha 1 chain [Source:HGNC Symbol;Acc:HGNC:2214]	protein_coding;retained_intron;processed_transcript	0.903186	0.730981	0.511507	0.547934	0.16889	0.147398	2.10994e-06	0.000101338
ENSG00000105929	ATP6V0A4	ENST00000393054;ENST00000310018;ENST00000644341;ENST00000483139	GO:0000220(vacuolar proton-transporting V-type ATPase, V0 domain);GO:0001503(ossification);GO:0005515(protein binding);GO:0005765(lysosomal membrane);GO:0005768(endosome);GO:0005886(plasma membrane);GO:0005903(brush border);GO:0006811(ion transport);GO:0006885(regulation of pH);GO:0007035(vacuolar acidification);GO:0007605(sensory perception of sound);GO:0010008(endosome membrane);GO:0016020(memb…	00190(Oxidative phosphorylation);01100(Metabolic pathways);04142(Lysosome);04145(Phagosome);04721(Synaptic vesicle cycle);04966(Collecting duct acid secretion);05110(Vibrio cholerae infection);05120(Epithelial cell signaling in Helicobacter pylori infection);05152(Tuberculosis);05165(Human papillomavirus infection);05323(Rheumatoid arthritis);05323(Rheumatoid arthritis)	ATPase H+ transporting V0 subunit a4 [Source:HGNC Symbol;Acc:HGNC:866]	protein_coding	2.54501	2.08252	1.4882	1.34298	0.530248	0.296376	2.23491e-06	0.000106997
ENSG00000198502	HLA-DRB5	ENST00000374975	GO:0000139(Golgi membrane);GO:0002250(adaptive immune response);GO:0002376(immune system process);GO:0002503(peptide antigen assembly with MHC class II protein complex);GO:0002504(antigen processing and presentation of peptide or polysaccharide antigen via MHC class II);GO:0005764(lysosome);GO:0005765(lysosomal membrane);GO:0005768(endosome);GO:0005783(endoplasmic reticulum);GO:0005789(endoplasmi…	04145(Phagosome);04514(Cell adhesion molecules);04612(Antigen processing and presentation);04640(Hematopoietic cell lineage);04658(Th1 and Th2 cell differentiation);04659(Th17 cell differentiation);04672(Intestinal immune network for IgA production);04940(Type I diabetes mellitus);05140(Leishmaniasis);05145(Toxoplasmosis);05150(Staphylococcus aureus infection);05152(Tuberculosis);05164(Influenza …	major histocompatibility complex, class II, DR beta 5 [Source:HGNC Symbol;Acc:HGNC:4953]	protein_coding	27.1126	18.8755	10.3922	5.34862	5.43037	6.36409	2.24976e-06	0.000107365
ENSG00000182606	TRAK1	ENST00000341421;ENST00000487159;ENST00000327628;ENST00000449246;ENST00000672026;ENST00000484786;ENST00000469506;ENST00000396175	GO:0005102(signaling receptor binding);GO:0005515(protein binding);GO:0005634(nucleus);GO:0005737(cytoplasm);GO:0005739(mitochondrion);GO:0005768(endosome);GO:0005769(early endosome);GO:0005829(cytosol);GO:0005938(cell cortex);GO:0006357(regulation of transcription by RNA polymerase II);GO:0006493(protein O-linked glycosylation);GO:0006605(protein targeting);GO:0008333(endosome to lysosome transp…	NA	trafficking kinesin protein 1 [Source:HGNC Symbol;Acc:HGNC:29947]	protein_coding;retained_intron	1.48023	1.85964	1.60908	1.92613	4.36562	4.43641	2.26842e-06	0.000107912
ENSG00000170892	TSEN34	ENST00000653273;ENST00000396388;ENST00000302937;ENST00000496583;ENST00000429671;ENST00000396383;ENST00000455798;ENST00000667261;ENST00000665674	GO:0000213(tRNA-intron endonuclease activity);GO:0000214(tRNA-intron endonuclease complex);GO:0000379(tRNA-type intron splice site recognition and cleavage);GO:0003676(nucleic acid binding);GO:0004519(endonuclease activity);GO:0005634(nucleus);GO:0005654(nucleoplasm);GO:0005730(nucleolus);GO:0006388(tRNA splicing, via endonucleolytic cleavage and ligation);GO:0006397(mRNA processing);GO:0008033(t…	NA	tRNA splicing endonuclease subunit 34 [Source:HGNC Symbol;Acc:HGNC:15506]	protein_coding;retained_intron	34.4923	36.0279	27.604	31.8952	10.5759	12.8603	2.41985e-06	0.000114752
ENSG00000289701	ENSG00000289701	ENST00000696169	GO:0042981(regulation of apoptotic process)	NA	novel transcript	nonsense_mediated_decay	2.25548	1.74222	1.27048	1.30187	0.326225	0.397189	2.47048e-06	0.000116783
ENSG00000152137	HSPB8	ENST00000281938	GO:0005515(protein binding);GO:0005634(nucleus);GO:0005654(nucleoplasm);GO:0005737(cytoplasm);GO:0005829(cytosol);GO:0034620(cellular response to unfolded protein);GO:0042802(identical protein binding);GO:0042803(protein homodimerization activity);GO:0101031(chaperone complex);GO:1905337(positive regulation of aggrephagy)	NA	heat shock protein family B (small) member 8 [Source:HGNC Symbol;Acc:HGNC:30171]	protein_coding	5.52752	3.5221	1.7274	1.40467	0.818225	1.25351	2.68415e-06	0.000126484
ENSG00000077942	FBLN1	ENST00000262722;ENST00000327858;ENST00000455233;ENST00000402984;ENST00000437711;ENST00000454279;ENST00000442170;ENST00000484531;ENST00000465578;ENST00000340923	GO:0001933(negative regulation of protein phosphorylation);GO:0001968(fibronectin binding);GO:0005178(integrin binding);GO:0005201(extracellular matrix structural constituent);GO:0005509(calcium ion binding);GO:0005515(protein binding);GO:0005576(extracellular region);GO:0005604(basement membrane);GO:0005615(extracellular space);GO:0007162(negative regulation of cell adhesion);GO:0007566(embryo i…	NA	fibulin 1 [Source:HGNC Symbol;Acc:HGNC:3600]	protein_coding;nonsense_mediated_decay;retained_intron	3.0883	2.99577	2.6293	2.58572	0.71661	0.953112	2.79391e-06	0.000131244
ENSG00000129437	KLK14	ENST00000650543;ENST00000391802;ENST00000156499	GO:0004252(serine-type endopeptidase activity);GO:0005576(extracellular region);GO:0005615(extracellular space);GO:0006508(proteolysis);GO:0008233(peptidase activity);GO:0008236(serine-type peptidase activity);GO:0009566(fertilization);GO:0016787(hydrolase activity);GO:0030141(secretory granule);GO:0045744(negative regulation of G protein-coupled receptor signaling pathway);GO:0045745(positive re…	NA	kallikrein related peptidase 14 [Source:HGNC Symbol;Acc:HGNC:6362]	protein_coding	3.29837	3.07474	0.782232	1.15077	0.435856	0.124184	3.13528e-06	0.000146819
ENSG00000168679	SLC16A4	ENST00000369779;ENST00000467986;ENST00000541986;ENST00000461647;ENST00000369781;ENST00000492412;ENST00000528649;ENST00000437429	GO:0005515(protein binding);GO:0005886(plasma membrane);GO:0005887(integral component of plasma membrane);GO:0008028(monocarboxylic acid transmembrane transporter activity);GO:0015293(symporter activity);GO:0015718(monocarboxylic acid transport);GO:0016020(membrane);GO:0016021(integral component of membrane);GO:0022857(transmembrane transporter activity);GO:0055085(transmembrane transport);GO:005…	NA	solute carrier family 16 member 4 [Source:HGNC Symbol;Acc:HGNC:10925]	protein_coding;nonsense_mediated_decay	0.92422	1.00375	0.533286	0.708414	0.108853	0.0876686	3.16858e-06	0.000147916
ENSG00000064787	BCAS1	ENST00000371435;ENST00000395961;ENST00000422805;ENST00000448484;ENST00000685429;ENST00000690125;ENST00000688711	GO:0005737(cytoplasm);GO:0042552(myelination);GO:0070062(extracellular exosome);GO:0070062(extracellular exosome)	NA	brain enriched myelin associated protein 1 [Source:HGNC Symbol;Acc:HGNC:974]	protein_coding	1.51191	1.61257	1.30383	1.74358	4.41566	3.70167	3.22948e-06	0.000150291
ENSG00000129968	ABHD17A	ENST00000292577;ENST00000588598;ENST00000591351;ENST00000250974;ENST00000677868;ENST00000676686;ENST00000592757	GO:0002084(protein depalmitoylation);GO:0005515(protein binding);GO:0005768(endosome);GO:0005886(plasma membrane);GO:0008474(palmitoyl-(protein) hydrolase activity);GO:0010008(endosome membrane);GO:0014069(postsynaptic density);GO:0016020(membrane);GO:0016607(nuclear speck);GO:0016787(hydrolase activity);GO:0030054(cell junction);GO:0042995(cell projection);GO:0043197(dendritic spine);GO:0043231(…	NA	abhydrolase domain containing 17A, depalmitoylase [Source:HGNC Symbol;Acc:HGNC:28756]	protein_coding;retained_intron;nonsense_mediated_decay	6.01613	5.18057	4.47769	3.6059	1.54376	1.68263	3.35675e-06	0.00015573
ENSG00000259522	ENSG00000259522	ENST00000561419	GO:0016020(membrane);GO:0016021(integral component of membrane);GO:0072657(protein localization to membrane)	NA	novel protein	nonsense_mediated_decay	10.0954	10.9307	11.879	3.51462	2.06461	0.647567	3.45006e-06	0.000159565
ENSG00000125999	BPIFB1	ENST00000253354;ENST00000423645	GO:0002227(innate immune response in mucosa);GO:0002376(immune system process);GO:0003674(molecular_function);GO:0005576(extracellular region);GO:0005615(extracellular space);GO:0008289(lipid binding);GO:0034144(negative regulation of toll-like receptor 4 signaling pathway);GO:0045087(innate immune response);GO:0070062(extracellular exosome);GO:0070062(extracellular exosome)	NA	BPI fold containing family B member 1 [Source:HGNC Symbol;Acc:HGNC:16108]	protein_coding	0.361783	0.530713	0.160575	0.200703	1.74239	1.03509	3.73743e-06	0.000172324
ENSG00000076706	MCAM	ENST00000264036;ENST00000530006;ENST00000524940;ENST00000528533;ENST00000525586;ENST00000528976	GO:0001525(angiogenesis);GO:0003094(glomerular filtration);GO:0005576(extracellular region);GO:0005615(extracellular space);GO:0005634(nucleus);GO:0005886(plasma membrane);GO:0005925(focal adhesion);GO:0007155(cell adhesion);GO:0009653(anatomical structure morphogenesis);GO:0009897(external side of plasma membrane);GO:0016020(membrane);GO:0016021(integral component of membrane);GO:0030335(positiv…	NA	melanoma cell adhesion molecule [Source:HGNC Symbol;Acc:HGNC:6934]	protein_coding;retained_intron;processed_transcript	0.231676	0.234128	0.261855	0.142021	0.0075728	0.0181546	4.2005e-06	0.000193081
ENSG00000183098	GPC6	ENST00000377047;ENST00000617456	GO:0005515(protein binding);GO:0005576(extracellular region);GO:0005615(extracellular space);GO:0005634(nucleus);GO:0005796(Golgi lumen);GO:0005886(plasma membrane);GO:0009966(regulation of signal transduction);GO:0009986(cell surface);GO:0016020(membrane);GO:0016477(cell migration);GO:0031225(anchored component of membrane);GO:0043202(lysosomal lumen);GO:0045202(synapse);GO:0046658(anchored comp…	NA	glypican 6 [Source:HGNC Symbol;Acc:HGNC:4454]	protein_coding	0.970181	0.956104	0.429079	0.287087	1.71485	1.50965	4.42217e-06	0.000202649
ENSG00000118515	SGK1	ENST00000237305;ENST00000367857;ENST00000367855;ENST00000474427;ENST00000528577;ENST00000490149;ENST00000525877;ENST00000475882;ENST00000531782;ENST00000534658;ENST00000477460;ENST00000473704;ENST00000524929;ENST00000524764;ENST00000472859;ENST00000413996;ENST00000532856;ENST00000530421	GO:0000166(nucleotide binding);GO:0001558(regulation of cell growth);GO:0004672(protein kinase activity);GO:0004674(protein serine/threonine kinase activity);GO:0004712(protein serine/threonine/tyrosine kinase activity);GO:0005246(calcium channel regulator activity);GO:0005515(protein binding);GO:0005524(ATP binding);GO:0005634(nucleus);GO:0005654(nucleoplasm);GO:0005737(cytoplasm);GO:0005739(mit…	04068(FoxO signaling pathway);04150(mTOR signaling pathway);04151(PI3K-Akt signaling pathway);04960(Aldosterone-regulated sodium reabsorption);04960(Aldosterone-regulated sodium reabsorption)	serum/glucocorticoid regulated kinase 1 [Source:HGNC Symbol;Acc:HGNC:10810]	protein_coding;retained_intron	1.91536	1.81573	1.89339	1.45687	5.02225	4.0043	4.44368e-06	0.000203014
ENSG00000146205	ANO7	ENST00000674324;ENST00000487192;ENST00000471606;ENST00000481071;ENST00000274979;ENST00000459928	GO:0005229(intracellular calcium activated chloride channel activity);GO:0005254(chloride channel activity);GO:0005737(cytoplasm);GO:0005783(endoplasmic reticulum);GO:0005829(cytosol);GO:0005886(plasma membrane);GO:0006821(chloride transport);GO:0006869(lipid transport);GO:0016020(membrane);GO:0016021(integral component of membrane);GO:0017128(phospholipid scramblase activity);GO:0030054(cell jun…	NA	anoctamin 7 [Source:HGNC Symbol;Acc:HGNC:31677]	protein_coding;retained_intron	0.0798966	0.091063	0.0435275	0.0976367	0.474816	0.515847	4.468e-06	0.000203505
ENSG00000117122	MFAP2	ENST00000375535;ENST00000478684;ENST00000375534;ENST00000476788;ENST00000490075;ENST00000492598	GO:0001527(microfibril);GO:0005201(extracellular matrix structural constituent);GO:0005515(protein binding);GO:0005576(extracellular region);GO:0048048(embryonic eye morphogenesis);GO:0048050(post-embryonic eye morphogenesis);GO:0062023(collagen-containing extracellular matrix);GO:0110165(cellular anatomical entity);GO:0120162(positive regulation of cold-induced thermogenesis);GO:0120162(positive…	NA	microfibril associated protein 2 [Source:HGNC Symbol;Acc:HGNC:7033]	protein_coding;processed_transcript	2.41034	1.49183	1.78467	1.34949	4.88095	6.78282	4.48837e-06	0.000203813
ENSG00000103326	CAPN15	ENST00000565010;ENST00000219611;ENST00000567216;ENST00000568988;ENST00000637507;ENST00000568402;ENST00000562370	GO:0004198(calcium-dependent cysteine-type endopeptidase activity);GO:0005515(protein binding);GO:0005737(cytoplasm);GO:0006508(proteolysis);GO:0008233(peptidase activity);GO:0008234(cysteine-type peptidase activity);GO:0016787(hydrolase activity);GO:0046872(metal ion binding);GO:0046872(metal ion binding)	NA	calpain 15 [Source:HGNC Symbol;Acc:HGNC:11182]	retained_intron;protein_coding;processed_transcript	4.4756	7.27135	5.38133	8.26541	2.03314	1.83138	4.81369e-06	0.000217925
ENSG00000275896	PRSS2	ENST00000539842;ENST00000610835;ENST00000633969	GO:0004222(metalloendopeptidase activity);GO:0004252(serine-type endopeptidase activity);GO:0005509(calcium ion binding);GO:0005515(protein binding);GO:0005576(extracellular region);GO:0005615(extracellular space);GO:0006508(proteolysis);GO:0007586(digestion);GO:0008233(peptidase activity);GO:0008236(serine-type peptidase activity);GO:0016787(hydrolase activity);GO:0019730(antimicrobial humoral r…	04080(Neuroactive ligand-receptor interaction);04972(Pancreatic secretion);04974(Protein digestion and absorption);05164(Influenza A);05164(Influenza A)	serine protease 2 [Source:HGNC Symbol;Acc:HGNC:9483]	protein_coding;retained_intron	1.46123	0.719641	0.671158	0.496985	3.89253	3.71032	5.11715e-06	0.000230965
ENSG00000177685	CRACR2B	ENST00000527763;ENST00000528694;ENST00000525077;ENST00000533803;ENST00000526531;ENST00000530737;ENST00000530688;ENST00000450448;ENST00000527089;ENST00000528315;ENST00000534191;ENST00000528542	GO:0002115(store-operated calcium entry);GO:0005509(calcium ion binding);GO:0005515(protein binding);GO:0005737(cytoplasm);GO:2001256(regulation of store-operated calcium entry);GO:2001256(regulation of store-operated calcium entry)	NA	calcium release activated channel regulator 2B [Source:HGNC Symbol;Acc:HGNC:28703]	retained_intron;protein_coding	3.57088	2.21755	3.73146	2.42792	0.664955	0.749996	5.4532e-06	0.000245394
ENSG00000181588	MEX3D	ENST00000402693;ENST00000605173	GO:0003676(nucleic acid binding);GO:0003723(RNA binding);GO:0005634(nucleus);GO:0005737(cytoplasm);GO:0010609(mRNA localization resulting in post-transcriptional regulation of gene expression);GO:0035925(mRNA 3'-UTR AU-rich region binding);GO:0046872(metal ion binding);GO:0048471(perinuclear region of cytoplasm);GO:0061157(mRNA destabilization);GO:0061157(mRNA destabilization)	NA	mex-3 RNA binding family member D [Source:HGNC Symbol;Acc:HGNC:16734]	protein_coding	6.28886	12.4589	6.16538	8.84913	2.2168	2.28062	5.4876e-06	0.000246202
ENSG00000198918	RPL39	ENST00000361575;ENST00000468844;ENST00000477403	GO:0002181(cytoplasmic translation);GO:0002227(innate immune response in mucosa);GO:0003723(RNA binding);GO:0003735(structural constituent of ribosome);GO:0005615(extracellular space);GO:0005730(nucleolus);GO:0005829(cytosol);GO:0005840(ribosome);GO:0006396(RNA processing);GO:0006412(translation);GO:0019731(antibacterial humoral response);GO:0022625(cytosolic large ribosomal subunit);GO:0022626(c…	03010(Ribosome);05171(Coronavirus disease - COVID-19);05171(Coronavirus disease - COVID-19)	ribosomal protein L39 [Source:HGNC Symbol;Acc:HGNC:10350]	protein_coding;processed_transcript	69.511	44.3448	52.1465	37.8472	104.616	166.497	5.55125e-06	0.000248315
ENSG00000106366	SERPINE1	ENST00000223095	GO:0001525(angiogenesis);GO:0002020(protease binding);GO:0004867(serine-type endopeptidase inhibitor activity);GO:0005102(signaling receptor binding);GO:0005515(protein binding);GO:0005576(extracellular region);GO:0005615(extracellular space);GO:0005886(plasma membrane);GO:0010466(negative regulation of peptidase activity);GO:0010469(regulation of signaling receptor activity);GO:0010757(negative …	04066(HIF-1 signaling pathway);04115(p53 signaling pathway);04218(Cellular senescence);04371(Apelin signaling pathway);04390(Hippo signaling pathway);04610(Complement and coagulation cascades);04933(AGE-RAGE signaling pathway in diabetic complications);05142(Chagas disease)	serpin family E member 1 [Source:HGNC Symbol;Acc:HGNC:8583]	protein_coding	2.32443	1.89485	0.579402	0.560702	0.523994	0.483314	6.0579e-06	0.000270171
ENSG00000289332	ENSG00000289332	ENST00000691844	NA	NA	novel transcript, antisense to MIPEP	lncRNA	82.6778	51.4324	71.1646	36.4247	17.4387	18.1037	6.22023e-06	0.000276079
ENSG00000135480	KRT7	ENST00000331817;ENST00000552322;ENST00000548657;ENST00000549638;ENST00000552183;ENST00000546666;ENST00000552400;ENST00000550153;ENST00000548088;ENST00000551130;ENST00000546856;ENST00000547613	GO:0005515(protein binding);GO:0005634(nucleus);GO:0005737(cytoplasm);GO:0005829(cytosol);GO:0005882(intermediate filament);GO:0030280(structural constituent of skin epidermis);GO:0031424(keratinization);GO:0045095(keratin filament);GO:0045109(intermediate filament organization);GO:0045111(intermediate filament cytoskeleton);GO:0070062(extracellular exosome);GO:0070062(extracellular exosome)	NA	keratin 7 [Source:HGNC Symbol;Acc:HGNC:6445]	protein_coding;processed_transcript;retained_intron	6.2233	3.97277	6.18001	6.21761	0.742347	1.82886	6.22721e-06	0.000276079
ENSG00000092969	TGFB2	ENST00000366929;ENST00000366930;ENST00000479322;ENST00000488793	GO:0000902(cell morphogenesis);GO:0001501(skeletal system development);GO:0001540(amyloid-beta binding);GO:0001654(eye development);GO:0001666(response to hypoxia);GO:0001822(kidney development);GO:0001837(epithelial to mesenchymal transition);GO:0001843(neural tube closure);GO:0001942(hair follicle development);GO:0003007(heart morphogenesis);GO:0003148(outflow tract septum morphogenesis);GO:000…	04010(MAPK signaling pathway);04060(Cytokine-cytokine receptor interaction);04068(FoxO signaling pathway);04110(Cell cycle);04218(Cellular senescence);04350(TGF-beta signaling pathway);04380(Osteoclast differentiation);04390(Hippo signaling pathway);04933(AGE-RAGE signaling pathway in diabetic complications);05140(Leishmaniasis);05142(Chagas disease);05144(Malaria);05145(Toxoplasmosis);05146(Amoe…	transforming growth factor beta 2 [Source:HGNC Symbol;Acc:HGNC:11768]	protein_coding;processed_transcript	0.710561	1.5576	0.933773	1.47754	4.1934	3.83329	6.35025e-06	0.000279878
ENSG00000289720	ENSG00000289720	ENST00000696978;ENST00000664852;ENST00000696980	GO:0004842(ubiquitin-protein transferase activity);GO:0016567(protein ubiquitination);GO:0016567(protein ubiquitination)	NA	novel protein	nonsense_mediated_decay	2.00354	6.04167	0.329559	0.899768	0.931737	0.260285	6.34652e-06	0.000279878
ENSG00000172164	SNTB1	ENST00000395601;ENST00000517992;ENST00000520717;ENST00000519177	GO:0003779(actin binding);GO:0005198(structural molecule activity);GO:0005515(protein binding);GO:0005516(calmodulin binding);GO:0005737(cytoplasm);GO:0005856(cytoskeleton);GO:0005886(plasma membrane);GO:0005925(focal adhesion);GO:0006936(muscle contraction);GO:0016010(dystrophin-associated glycoprotein complex);GO:0016020(membrane);GO:0030054(cell junction);GO:0030165(PDZ domain binding);GO:0032…	NA	syntrophin beta 1 [Source:HGNC Symbol;Acc:HGNC:11168]	protein_coding;processed_transcript	1.34779	1.42172	1.5013	1.86306	0.413064	0.383844	6.44236e-06	0.000283105
ENSG00000137628	DDX60	ENST00000679510;ENST00000680771;ENST00000507815;ENST00000681832;ENST00000511317	GO:0000166(nucleotide binding);GO:0002376(immune system process);GO:0003676(nucleic acid binding);GO:0003690(double-stranded DNA binding);GO:0003723(RNA binding);GO:0003724(RNA helicase activity);GO:0003725(double-stranded RNA binding);GO:0003727(single-stranded RNA binding);GO:0004386(helicase activity);GO:0005515(protein binding);GO:0005524(ATP binding);GO:0005737(cytoplasm);GO:0005829(cytosol)…	NA	DExD/H-box helicase 60 [Source:HGNC Symbol;Acc:HGNC:25942]	nonsense_mediated_decay;protein_coding;retained_intron	0.246639	0.169466	0.423391	0.300456	0.0431507	0.0702666	6.7593e-06	0.00029456
ENSG00000074071	MRPS34	ENST00000397375;ENST00000177742;ENST00000569585	GO:0003735(structural constituent of ribosome);GO:0005739(mitochondrion);GO:0005743(mitochondrial inner membrane);GO:0005763(mitochondrial small ribosomal subunit);GO:0005840(ribosome);GO:0032543(mitochondrial translation);GO:0032543(mitochondrial translation)	NA	mitochondrial ribosomal protein S34 [Source:HGNC Symbol;Acc:HGNC:16618]	protein_coding;retained_intron	144.585	94.5584	135.236	85.2391	33.9891	40.4749	6.762e-06	0.00029456
ENSG00000127415	IDUA	ENST00000514224;ENST00000247933;ENST00000514698;ENST00000652070;ENST00000502829;ENST00000509744;ENST00000508168;ENST00000509948;ENST00000504568;ENST00000514417;ENST00000506561	GO:0003940(L-iduronidase activity);GO:0004553(hydrolase activity, hydrolyzing O-glycosyl compounds);GO:0005102(signaling receptor binding);GO:0005764(lysosome);GO:0005975(carbohydrate metabolic process);GO:0005984(disaccharide metabolic process);GO:0006027(glycosaminoglycan catabolic process);GO:0008152(metabolic process);GO:0016787(hydrolase activity);GO:0016798(hydrolase activity, acting on gly…	00531(Glycosaminoglycan degradation);01100(Metabolic pathways);04142(Lysosome);04142(Lysosome)	alpha-L-iduronidase [Source:HGNC Symbol;Acc:HGNC:5391]	protein_coding;retained_intron;processed_transcript	2.99729	2.82262	2.2399	2.93744	0.496136	0.832033	6.86997e-06	0.000298396
ENSG00000213563	C8orf82	ENST00000313465;ENST00000524821;ENST00000534680;ENST00000532827	NA	NA	chromosome 8 open reading frame 82 [Source:HGNC Symbol;Acc:HGNC:33826]	protein_coding;nonsense_mediated_decay	11.2461	11.7417	9.14128	8.69232	3.89614	3.27015	7.38706e-06	0.000319928
ENSG00000106789	CORO2A	ENST00000375077;ENST00000343933	GO:0003779(actin binding);GO:0005515(protein binding);GO:0017053(transcription repressor complex);GO:0035556(intracellular signal transduction);GO:0051015(actin filament binding);GO:0051015(actin filament binding)	NA	coronin 2A [Source:HGNC Symbol;Acc:HGNC:2255]	protein_coding	1.06375	1.0934	0.926568	0.700005	2.89999	2.59838	7.45306e-06	0.000321856
ENSG00000121552	CSTA	ENST00000264474;ENST00000479204	GO:0001533(cornified envelope);GO:0002020(protease binding);GO:0004866(endopeptidase inhibitor activity);GO:0004869(cysteine-type endopeptidase inhibitor activity);GO:0005515(protein binding);GO:0005615(extracellular space);GO:0005654(nucleoplasm);GO:0005737(cytoplasm);GO:0005829(cytosol);GO:0007155(cell adhesion);GO:0010466(negative regulation of peptidase activity);GO:0010951(negative regulatio…	NA	cystatin A [Source:HGNC Symbol;Acc:HGNC:2481]	protein_coding	0.675393	0.394274	0.345139	0.208373	1.83558	2.78469	7.52047e-06	0.000323834
ENSG00000178802	MPI	ENST00000352410;ENST00000535694;ENST00000563786;ENST00000323744;ENST00000566377;ENST00000566556;ENST00000565576;ENST00000563422;ENST00000562606;ENST00000564003;ENST00000568303;ENST00000569233;ENST00000567116;ENST00000567570;ENST00000569931;ENST00000568907;ENST00000567177;ENST00000561470;ENST00000568840	GO:0004476(mannose-6-phosphate isomerase activity);GO:0005515(protein binding);GO:0005737(cytoplasm);GO:0005829(cytosol);GO:0005975(carbohydrate metabolic process);GO:0008270(zinc ion binding);GO:0009298(GDP-mannose biosynthetic process);GO:0016853(isomerase activity);GO:0046872(metal ion binding);GO:0061611(mannose to fructose-6-phosphate metabolic process);GO:0070062(extracellular exosome);GO:0…	00051(Fructose and mannose metabolism);00520(Amino sugar and nucleotide sugar metabolism);01100(Metabolic pathways);01240(Biosynthesis of cofactors);01240(Biosynthesis of cofactors)	mannose phosphate isomerase [Source:HGNC Symbol;Acc:HGNC:7216]	protein_coding;retained_intron;nonsense_mediated_decay	4.8327	4.05214	2.81225	2.41265	6.72443	8.20748	7.81691e-06	0.000335634
ENSG00000154188	ANGPT1	ENST00000297450;ENST00000520734;ENST00000517746;ENST00000522400	GO:0001525(angiogenesis);GO:0001701(in utero embryonic development);GO:0001933(negative regulation of protein phosphorylation);GO:0001934(positive regulation of protein phosphorylation);GO:0002040(sprouting angiogenesis);GO:0002092(positive regulation of receptor internalization);GO:0002719(negative regulation of cytokine production involved in immune response);GO:0005102(signaling receptor bindi…	04010(MAPK signaling pathway);04014(Ras signaling pathway);04015(Rap1 signaling pathway);04066(HIF-1 signaling pathway);04151(PI3K-Akt signaling pathway);05323(Rheumatoid arthritis);05323(Rheumatoid arthritis)	angiopoietin 1 [Source:HGNC Symbol;Acc:HGNC:484]	protein_coding;retained_intron	0.031602	0.02179	0.0696415	0.0701804	0.301845	0.304622	7.92759e-06	0.000339414
ENSG00000171223	JUNB	ENST00000302754	GO:0000785(chromatin);GO:0000977(RNA polymerase II transcription regulatory region sequence-specific DNA binding);GO:0000978(RNA polymerase II cis-regulatory region sequence-specific DNA binding);GO:0000981(DNA-binding transcription factor activity, RNA polymerase II-specific);GO:0001228(DNA-binding transcription activator activity, RNA polymerase II-specific);GO:0001570(vasculogenesis);GO:000164…	04380(Osteoclast differentiation);04668(TNF signaling pathway);04935(Growth hormone synthesis, secretion and action)	JunB proto-oncogene, AP-1 transcription factor subunit [Source:HGNC Symbol;Acc:HGNC:6205]	protein_coding	57.5845	42.8315	63.5952	40.4413	13.3562	19.9207	8.54604e-06	0.00036485
ENSG00000272449	ENSG00000272449	ENST00000606645	NA	NA	novel transcript	lncRNA	4.34611	1.77352	3.29797	1.77673	0.267449	0.456917	8.7849e-06	0.000373982
ENSG00000277399	GPR179	ENST00000616987	GO:0004930(G protein-coupled receptor activity);GO:0005886(plasma membrane);GO:0007165(signal transduction);GO:0007186(G protein-coupled receptor signaling pathway);GO:0007601(visual perception);GO:0016020(membrane);GO:0016021(integral component of membrane);GO:0044292(dendrite terminus);GO:0072659(protein localization to plasma membrane)	NA	G protein-coupled receptor 179 [Source:HGNC Symbol;Acc:HGNC:31371]	protein_coding	3.45968	5.65032	2.98807	6.58923	1.43189	0.711457	8.81036e-06	0.000374004
ENSG00000188157	AGRN	ENST00000379370;ENST00000652369;ENST00000620552;ENST00000461111;ENST00000466223;ENST00000479707;ENST00000478677;ENST00000469403;ENST00000492947;ENST00000651234	GO:0002162(dystroglycan binding);GO:0005200(structural constituent of cytoskeleton);GO:0005201(extracellular matrix structural constituent);GO:0005509(calcium ion binding);GO:0005515(protein binding);GO:0005576(extracellular region);GO:0005604(basement membrane);GO:0005796(Golgi lumen);GO:0005886(plasma membrane);GO:0007010(cytoskeleton organization);GO:0007165(signal transduction);GO:0007213(G p…	04512(ECM-receptor interaction);04512(ECM-receptor interaction)	agrin [Source:HGNC Symbol;Acc:HGNC:329]	protein_coding;retained_intron	24.8596	32.2174	26.0923	31.4766	10.5391	10.6997	8.9195e-06	0.000377567
ENSG00000235174	RPL39P3	ENST00000424573	NA	NA	ribosomal protein L39 pseudogene 3 [Source:HGNC Symbol;Acc:HGNC:21383]	processed_pseudogene	65.821	55.5384	61.3983	48.7573	142.165	174.793	8.96308e-06	0.000378343
ENSG00000102172	SMS	ENST00000404933;ENST00000379404;ENST00000457085	GO:0005829(cytosol);GO:0006555(methionine metabolic process);GO:0006595(polyamine metabolic process);GO:0006596(polyamine biosynthetic process);GO:0006597(spermine biosynthetic process);GO:0008215(spermine metabolic process);GO:0016740(transferase activity);GO:0016768(spermine synthase activity);GO:0070062(extracellular exosome);GO:0070062(extracellular exosome)	00270(Cysteine and methionine metabolism);00330(Arginine and proline metabolism);00480(Glutathione metabolism);01100(Metabolic pathways);01100(Metabolic pathways)	spermine synthase [Source:HGNC Symbol;Acc:HGNC:11123]	protein_coding	55.5172	46.9188	52.5918	39.2415	99.7153	129.385	9.06344e-06	0.000381505
ENSG00000123144	TRIR	ENST00000591254;ENST00000242784;ENST00000589590	GO:0003723(RNA binding);GO:0004518(nuclease activity);GO:0004527(exonuclease activity);GO:0005515(protein binding);GO:0008408(3'-5' exonuclease activity);GO:0008409(5'-3' exonuclease activity);GO:0016075(rRNA catabolic process);GO:0016787(hydrolase activity);GO:0090503(RNA phosphodiester bond hydrolysis, exonucleolytic);GO:0090503(RNA phosphodiester bond hydrolysis, exonucleolytic)	NA	telomerase RNA component interacting RNase [Source:HGNC Symbol;Acc:HGNC:28424]	nonsense_mediated_decay;protein_coding;retained_intron	135.064	96.4552	124.464	81.628	23.736	42.7073	9.86296e-06	0.000413996
ENSG00000113231	PDE8B	ENST00000264917	GO:0001662(behavioral fear response);GO:0004114(3',5'-cyclic-nucleotide phosphodiesterase activity);GO:0004115(3',5'-cyclic-AMP phosphodiesterase activity);GO:0005575(cellular_component);GO:0005829(cytosol);GO:0006198(cAMP catabolic process);GO:0007165(signal transduction);GO:0008081(phosphoric diester hydrolase activity);GO:0008542(visual learning);GO:0016787(hydrolase activity);GO:0035106(opera…	00230(Purine metabolism);01100(Metabolic pathways);04927(Cortisol synthesis and secretion);04934(Cushing syndrome);05032(Morphine addiction)	phosphodiesterase 8B [Source:HGNC Symbol;Acc:HGNC:8794]	protein_coding	0.16668	0.132958	0.250414	0.197734	0.86825	0.725356	1.03286e-05	0.000431127
ENSG00000081842	PCDHA6	ENST00000529310;ENST00000378126	GO:0005509(calcium ion binding);GO:0005576(extracellular region);GO:0005886(plasma membrane);GO:0005887(integral component of plasma membrane);GO:0007155(cell adhesion);GO:0007156(homophilic cell adhesion via plasma membrane adhesion molecules);GO:0007399(nervous system development);GO:0016020(membrane);GO:0016021(integral component of membrane);GO:0016021(integral component of membrane)	NA	protocadherin alpha 6 [Source:HGNC Symbol;Acc:HGNC:8672]	protein_coding	4.9897	5.31867	6.29629	5.077	2.13223	1.45703	1.03015e-05	0.000431127
ENSG00000114993	RTKN	ENST00000233330;ENST00000640304;ENST00000272430;ENST00000305557;ENST00000472518;ENST00000492013;ENST00000464094;ENST00000460968;ENST00000484453;ENST00000469859	GO:0000166(nucleotide binding);GO:0000281(mitotic cytokinesis);GO:0000915(actomyosin contractile ring assembly);GO:0005095(GTPase inhibitor activity);GO:0005515(protein binding);GO:0005525(GTP binding);GO:0005575(cellular_component);GO:0005826(actomyosin contractile ring);GO:0005829(cytosol);GO:0006915(apoptotic process);GO:0007165(signal transduction);GO:0007266(Rho protein signal transduction);…	NA	rhotekin [Source:HGNC Symbol;Acc:HGNC:10466]	protein_coding;retained_intron;processed_transcript	3.76343	4.00041	2.3658	2.34147	1.11327	0.992714	1.07253e-05	0.000446439
ENSG00000144476	ACKR3	ENST00000272928;ENST00000447924	GO:0001525(angiogenesis);GO:0001570(vasculogenesis);GO:0004930(G protein-coupled receptor activity);GO:0005044(scavenger receptor activity);GO:0005515(protein binding);GO:0005634(nucleus);GO:0005737(cytoplasm);GO:0005768(endosome);GO:0005769(early endosome);GO:0005886(plasma membrane);GO:0005905(clathrin-coated pit);GO:0006935(chemotaxis);GO:0006955(immune response);GO:0007155(cell adhesion);GO:0…	04060(Cytokine-cytokine receptor interaction);04061(Viral protein interaction with cytokine and cytokine receptor);04061(Viral protein interaction with cytokine and cytokine receptor)	atypical chemokine receptor 3 [Source:HGNC Symbol;Acc:HGNC:23692]	protein_coding	58.8083	64.6846	90.193	97.2922	35.0619	30.9412	1.10961e-05	0.000460596
ENSG00000108018	SORCS1	ENST00000612154;ENST00000263054;ENST00000486192;ENST00000452214;ENST00000473866;ENST00000472196	GO:0005515(protein binding);GO:0005794(Golgi apparatus);GO:0006892(post-Golgi vesicle-mediated transport);GO:0007218(neuropeptide signaling pathway);GO:0008188(neuropeptide receptor activity);GO:0016020(membrane);GO:0016021(integral component of membrane);GO:0016021(integral component of membrane)	NA	sortilin related VPS10 domain containing receptor 1 [Source:HGNC Symbol;Acc:HGNC:16697]	protein_coding;retained_intron;processed_transcript	0.108136	0.194715	0.0597853	0.0325288	0.352988	0.381896	1.11718e-05	0.000461253
ENSG00000174498	IGDCC3	ENST00000327987;ENST00000559947;ENST00000558354	GO:0005515(protein binding);GO:0005887(integral component of plasma membrane);GO:0016020(membrane);GO:0016021(integral component of membrane);GO:0050885(neuromuscular process controlling balance);GO:0098609(cell-cell adhesion);GO:0098609(cell-cell adhesion)	NA	immunoglobulin superfamily DCC subclass member 3 [Source:HGNC Symbol;Acc:HGNC:9700]	protein_coding;retained_intron	0.294638	0.454849	0.130441	0.306185	1.24768	1.15982	1.11735e-05	0.000461253
ENSG00000179271	GADD45GIP1	ENST00000316939	GO:0005515(protein binding);GO:0005634(nucleus);GO:0005654(nucleoplasm);GO:0005739(mitochondrion);GO:0005743(mitochondrial inner membrane);GO:0005759(mitochondrial matrix);GO:0005762(mitochondrial large ribosomal subunit);GO:0005840(ribosome);GO:0007049(cell cycle);GO:0032543(mitochondrial translation)	NA	GADD45G interacting protein 1 [Source:HGNC Symbol;Acc:HGNC:29996]	protein_coding	33.7589	24.5487	23.1985	17.3497	6.39516	10.0969	1.13274e-05	0.000466323
ENSG00000289861	ENSG00000289861	ENST00000701156	NA	NA	novel transcript	lncRNA	1.37852	0.708831	0.326044	1.0035	5.49549	3.99546	1.14322e-05	0.000468066
ENSG00000012171	SEMA3B	ENST00000618865;ENST00000433753;ENST00000619119;ENST00000616701;ENST00000419007;ENST00000441915;ENST00000611067;ENST00000456210;ENST00000621029;ENST00000456560;ENST00000416295;ENST00000418576;ENST00000434030;ENST00000612509	GO:0001755(neural crest cell migration);GO:0005515(protein binding);GO:0005576(extracellular region);GO:0005615(extracellular space);GO:0005783(endoplasmic reticulum);GO:0005887(integral component of plasma membrane);GO:0007267(cell-cell signaling);GO:0007411(axon guidance);GO:0030215(semaphorin receptor binding);GO:0030335(positive regulation of cell migration);GO:0045499(chemorepellent activity…	04360(Axon guidance);04360(Axon guidance)	semaphorin 3B [Source:HGNC Symbol;Acc:HGNC:10724]	protein_coding;retained_intron;processed_transcript	8.27846	4.46978	3.92881	2.45507	1.55188	1.69495	1.14158e-05	0.000468066
ENSG00000171813	PWWP2B	ENST00000631148;ENST00000305233	GO:0005515(protein binding);GO:0005634(nucleus);GO:0005654(nucleoplasm);GO:0032968(positive regulation of transcription elongation by RNA polymerase II);GO:0035067(negative regulation of histone acetylation);GO:0120161(regulation of cold-induced thermogenesis);GO:0120325(NuRD complex binding);GO:1901675(negative regulation of histone H3-K27 acetylation);GO:2000616(negative regulation of histone H…	NA	PWWP domain containing 2B [Source:HGNC Symbol;Acc:HGNC:25150]	protein_coding	11.5876	9.9384	10.4325	8.39882	3.45635	3.34491	1.16424e-05	0.00047537
ENSG00000185634	SHC4	ENST00000332408;ENST00000559289;ENST00000558220;ENST00000396535;ENST00000537958	GO:0005515(protein binding);GO:0005886(plasma membrane);GO:0006915(apoptotic process);GO:0007169(transmembrane receptor protein tyrosine kinase signaling pathway);GO:0008284(positive regulation of cell population proliferation);GO:0010468(regulation of gene expression);GO:0016020(membrane);GO:0019901(protein kinase binding);GO:0019904(protein domain specific binding);GO:0030054(cell junction);GO:…	01521(EGFR tyrosine kinase inhibitor resistance);01522(Endocrine resistance);04012(ErbB signaling pathway);04014(Ras signaling pathway);04062(Chemokine signaling pathway);04072(Phospholipase D signaling pathway);04510(Focal adhesion);04650(Natural killer cell mediated cytotoxicity);04722(Neurotrophin signaling pathway);04910(Insulin signaling pathway);04915(Estrogen signaling pathway);04917(Prola…	SHC adaptor protein 4 [Source:HGNC Symbol;Acc:HGNC:16743]	protein_coding;retained_intron	1.84397	1.88106	0.957517	1.3399	0.503181	0.304087	1.22619e-05	0.000499308
ENSG00000198680	TUSC1	ENST00000358022	NA	NA	tumor suppressor candidate 1 [Source:HGNC Symbol;Acc:HGNC:31010]	protein_coding	7.90311	7.05687	8.22824	5.8126	1.79335	2.00081	1.23423e-05	0.000501217
ENSG00000135063	FAM189A2	ENST00000303068;ENST00000645123;ENST00000645516;ENST00000460871;ENST00000469179;ENST00000455972	GO:0003674(molecular_function);GO:0005515(protein binding);GO:0005575(cellular_component);GO:0008150(biological_process);GO:0016020(membrane);GO:0016021(integral component of membrane);GO:0016021(integral component of membrane)	NA	family with sequence similarity 189 member A2 [Source:HGNC Symbol;Acc:HGNC:24820]	protein_coding;retained_intron;processed_transcript	1.11176	1.10211	0.327645	0.444481	1.50874	1.35301	1.3335e-05	0.00053861
ENSG00000006327	TNFRSF12A	ENST00000326577;ENST00000341627;ENST00000571351;ENST00000573001;ENST00000575836;ENST00000574699;ENST00000575124	GO:0001525(angiogenesis);GO:0005515(protein binding);GO:0005886(plasma membrane);GO:0006915(apoptotic process);GO:0007155(cell adhesion);GO:0016020(membrane);GO:0016021(integral component of membrane);GO:0030154(cell differentiation);GO:0043065(positive regulation of apoptotic process);GO:0061041(regulation of wound healing);GO:2001238(positive regulation of extrinsic apoptotic signaling pathway)…	04060(Cytokine-cytokine receptor interaction);04060(Cytokine-cytokine receptor interaction)	TNF receptor superfamily member 12A [Source:HGNC Symbol;Acc:HGNC:18152]	protein_coding;retained_intron;nonsense_mediated_decay	58.7866	49.3715	62.5706	37.2739	15.5007	20.4438	1.35123e-05	0.000544306
ENSG00000272502	ENSG00000272502	ENST00000605955	NA	NA	novel transcript	lncRNA	1.43274	0.921207	1.70503	0.577564	0.062458	0.027154	1.42964e-05	0.000574347
ENSG00000250241	PCDH10-DT	ENST00000656167;ENST00000664880;ENST00000505289;ENST00000671428;ENST00000667505;ENST00000665360;ENST00000659189	NA	NA	PCDH10 divergent transcript [Source:HGNC Symbol;Acc:HGNC:53036]	lncRNA	0.0372311	0.0067787	0.0130104	0.01659	0.206495	0.168353	1.50555e-05	0.000603227
ENSG00000160161	CILP2	ENST00000586018	GO:0005576(extracellular region);GO:0005615(extracellular space);GO:0070062(extracellular exosome);GO:0110165(cellular anatomical entity)	NA	cartilage intermediate layer protein 2 [Source:HGNC Symbol;Acc:HGNC:24213]	protein_coding	0.0645821	0.0237492	0.0698688	0.0798546	0.593275	0.367405	1.60309e-05	0.000640596
ENSG00000158716	DUSP23	ENST00000368108;ENST00000368107;ENST00000368109	GO:0004721(phosphoprotein phosphatase activity);GO:0004722(protein serine/threonine phosphatase activity);GO:0004725(protein tyrosine phosphatase activity);GO:0005515(protein binding);GO:0005634(nucleus);GO:0005654(nucleoplasm);GO:0005737(cytoplasm);GO:0005829(cytosol);GO:0006470(protein dephosphorylation);GO:0008138(protein tyrosine/serine/threonine phosphatase activity);GO:0016311(dephosphoryla…	NA	dual specificity phosphatase 23 [Source:HGNC Symbol;Acc:HGNC:21480]	protein_coding	13.0984	7.67942	10.1423	9.57031	1.38221	2.84155	1.63808e-05	0.000651104
ENSG00000155016	CYP2U1	ENST00000332884;ENST00000513302;ENST00000508453	GO:0004497(monooxygenase activity);GO:0005506(iron ion binding);GO:0005737(cytoplasm);GO:0005739(mitochondrion);GO:0005743(mitochondrial inner membrane);GO:0005783(endoplasmic reticulum);GO:0005789(endoplasmic reticulum membrane);GO:0006082(organic acid metabolic process);GO:0006629(lipid metabolic process);GO:0006805(xenobiotic metabolic process);GO:0008395(steroid hydroxylase activity);GO:00160…	00071(Fatty acid degradation);00590(Arachidonic acid metabolism);01100(Metabolic pathways);01100(Metabolic pathways)	cytochrome P450 family 2 subfamily U member 1 [Source:HGNC Symbol;Acc:HGNC:20582]	protein_coding;processed_transcript	0.557674	0.917186	0.304322	0.443776	1.72262	1.5826	1.69531e-05	0.000672069
ENSG00000143977	SNRPG	ENST00000272348;ENST00000482975;ENST00000429728;ENST00000480370;ENST00000438261;ENST00000413456;ENST00000454893;ENST00000488400;ENST00000449935	GO:0000245(spliceosomal complex assembly);GO:0000387(spliceosomal snRNP assembly);GO:0000398(mRNA splicing, via spliceosome);GO:0003723(RNA binding);GO:0005515(protein binding);GO:0005634(nucleus);GO:0005654(nucleoplasm);GO:0005681(spliceosomal complex);GO:0005682(U5 snRNP);GO:0005683(U7 snRNP);GO:0005685(U1 snRNP);GO:0005686(U2 snRNP);GO:0005687(U4 snRNP);GO:0005689(U12-type spliceosomal complex…	03040(Spliceosome);03040(Spliceosome)	small nuclear ribonucleoprotein polypeptide G [Source:HGNC Symbol;Acc:HGNC:11163]	protein_coding;processed_transcript;retained_intron	14.9121	11.7965	12.8099	9.51374	23.4963	40.2506	1.73016e-05	0.000684074
ENSG00000128422	KRT17	ENST00000311208;ENST00000590038;ENST00000648859;ENST00000649249;ENST00000491673;ENST00000493253	GO:0001533(cornified envelope);GO:0002009(morphogenesis of an epithelium);GO:0005198(structural molecule activity);GO:0005515(protein binding);GO:0005737(cytoplasm);GO:0005829(cytosol);GO:0005856(cytoskeleton);GO:0005882(intermediate filament);GO:0030307(positive regulation of cell growth);GO:0030855(epithelial cell differentiation);GO:0031069(hair follicle morphogenesis);GO:0031424(keratinizatio…	04915(Estrogen signaling pathway);05150(Staphylococcus aureus infection);05150(Staphylococcus aureus infection)	keratin 17 [Source:HGNC Symbol;Acc:HGNC:6427]	protein_coding;retained_intron	3.26724	2.5446	6.10999	4.49518	0.235788	1.13026	1.75806e-05	0.000693278
ENSG00000226057	PHF2P2	ENST00000444553;ENST00000416576;ENST00000647583	NA	NA	PHD finger protein 2 pseudogene 2 [Source:HGNC Symbol;Acc:HGNC:38808]	transcribed_unprocessed_pseudogene;processed_transcript	0.868091	1.20697	2.30564	3.84494	0.66667	0.88397	1.81764e-05	0.000714891
ENSG00000174808	BTC	ENST00000395743;ENST00000512743	GO:0005154(epidermal growth factor receptor binding);GO:0005515(protein binding);GO:0005576(extracellular region);GO:0005615(extracellular space);GO:0005886(plasma membrane);GO:0006915(apoptotic process);GO:0007165(signal transduction);GO:0007171(activation of transmembrane receptor protein tyrosine kinase activity);GO:0007173(epidermal growth factor receptor signaling pathway);GO:0008083(growth …	04012(ErbB signaling pathway);04012(ErbB signaling pathway)	betacellulin [Source:HGNC Symbol;Acc:HGNC:1121]	protein_coding	4.52484	3.90465	4.30714	3.7322	0.739123	1.32503	1.89054e-05	0.000741615
ENSG00000024422	EHD2	ENST00000263277;ENST00000596225;ENST00000540884;ENST00000538399	GO:0000166(nucleotide binding);GO:0003676(nucleic acid binding);GO:0005509(calcium ion binding);GO:0005515(protein binding);GO:0005524(ATP binding);GO:0005525(GTP binding);GO:0005634(nucleus);GO:0005737(cytoplasm);GO:0005768(endosome);GO:0005769(early endosome);GO:0005829(cytosol);GO:0005886(plasma membrane);GO:0005901(caveola);GO:0006897(endocytosis);GO:0010008(endosome membrane);GO:0015630(micr…	04144(Endocytosis);04144(Endocytosis)	EH domain containing 2 [Source:HGNC Symbol;Acc:HGNC:3243]	protein_coding;nonsense_mediated_decay;processed_transcript	4.47351	4.23174	7.39372	7.20722	2.2398	2.30268	1.91405e-05	0.000748878
ENSG00000198794	SCAMP5	ENST00000361900;ENST00000562212;ENST00000425597;ENST00000562765;ENST00000565923;ENST00000567529;ENST00000568081;ENST00000568423;ENST00000567920;ENST00000567535;ENST00000568018	GO:0000139(Golgi membrane);GO:0001819(positive regulation of cytokine production);GO:0005515(protein binding);GO:0005768(endosome);GO:0005794(Golgi apparatus);GO:0005886(plasma membrane);GO:0006887(exocytosis);GO:0015031(protein transport);GO:0016020(membrane);GO:0016021(integral component of membrane);GO:0030054(cell junction);GO:0030672(synaptic vesicle membrane);GO:0031410(cytoplasmic vesicle)…	NA	secretory carrier membrane protein 5 [Source:HGNC Symbol;Acc:HGNC:30386]	protein_coding;nonsense_mediated_decay;processed_transcript;retained_intron	3.0199	3.4464	2.18847	2.05222	6.11188	6.19667	1.94496e-05	0.000755056
ENSG00000257704	INAFM1	ENST00000552360	GO:0016020(membrane);GO:0016021(integral component of membrane)	NA	InaF motif containing 1 [Source:HGNC Symbol;Acc:HGNC:27406]	protein_coding	17.2449	10.0975	15.0381	9.75048	0.937682	3.31248	1.93847e-05	0.000755056
ENSG00000226067	LINC00623	ENST00000621058;ENST00000659101;ENST00000615424;ENST00000614062;ENST00000613486	NA	NA	long intergenic non-protein coding RNA 623 [Source:HGNC Symbol;Acc:HGNC:44252]	lncRNA	2.82286	2.35806	5.94479	3.34637	1.10977	0.92769	1.94153e-05	0.000755056
ENSG00000204099	NEU4	ENST00000618597;ENST00000407683;ENST00000423583;ENST00000494678;ENST00000391969	GO:0004308(exo-alpha-sialidase activity);GO:0005515(protein binding);GO:0005737(cytoplasm);GO:0005739(mitochondrion);GO:0005741(mitochondrial outer membrane);GO:0005743(mitochondrial inner membrane);GO:0005764(lysosome);GO:0005783(endoplasmic reticulum);GO:0005789(endoplasmic reticulum membrane);GO:0005886(plasma membrane);GO:0005975(carbohydrate metabolic process);GO:0006516(glycoprotein catabol…	00511(Other glycan degradation);00600(Sphingolipid metabolism);01100(Metabolic pathways);01100(Metabolic pathways)	neuraminidase 4 [Source:HGNC Symbol;Acc:HGNC:21328]	retained_intron;protein_coding	0.147993	0.115587	0.359606	0.432076	0	0.0245923	1.98528e-05	0.000768717
ENSG00000134759	ELP2	ENST00000442325;ENST00000542824;ENST00000351393;ENST00000358232;ENST00000541294;ENST00000539560;ENST00000350494;ENST00000541748;ENST00000545632;ENST00000535093;ENST00000542050;ENST00000544267;ENST00000542430;ENST00000543127;ENST00000540766;ENST00000536373;ENST00000536830;ENST00000544274;ENST00000545302;ENST00000540135;ENST00000535488;ENST00000541190;ENST00000540323	GO:0000993(RNA polymerase II complex binding);GO:0002098(tRNA wobble uridine modification);GO:0005515(protein binding);GO:0005634(nucleus);GO:0005654(nucleoplasm);GO:0005737(cytoplasm);GO:0005829(cytosol);GO:0006357(regulation of transcription by RNA polymerase II);GO:0006368(transcription elongation by RNA polymerase II promoter);GO:0006417(regulation of translation);GO:0008023(transcription elo…	NA	elongator acetyltransferase complex subunit 2 [Source:HGNC Symbol;Acc:HGNC:18248]	protein_coding;retained_intron;nonsense_mediated_decay;processed_transcript	24.7083	21.68	30.012	26.3161	56.5077	53.2574	2.08724e-05	0.000803078
ENSG00000185112	FAM43A	ENST00000329759	GO:0005515(protein binding)	NA	family with sequence similarity 43 member A [Source:HGNC Symbol;Acc:HGNC:26888]	protein_coding	1.85018	2.83224	1.7742	1.74924	0.325651	0.575168	2.09009e-05	0.000803078
ENSG00000187678	SPRY4	ENST00000434127;ENST00000643792;ENST00000344120;ENST00000509364;ENST00000503582	GO:0004860(protein kinase inhibitor activity);GO:0005515(protein binding);GO:0005737(cytoplasm);GO:0005829(cytosol);GO:0005886(plasma membrane);GO:0005925(focal adhesion);GO:0007275(multicellular organism development);GO:0009966(regulation of signal transduction);GO:0016020(membrane);GO:0032587(ruffle membrane);GO:0040037(negative regulation of fibroblast growth factor receptor signaling pathway)…	NA	sprouty RTK signaling antagonist 4 [Source:HGNC Symbol;Acc:HGNC:15533]	protein_coding;retained_intron;processed_transcript	0.457264	0.790329	0.975491	1.22196	0.243502	0.150894	2.10158e-05	0.000805425
ENSG00000124074	ENKD1	ENST00000243878;ENST00000602415;ENST00000602409;ENST00000602531;ENST00000602642;ENST00000602942	GO:0005515(protein binding);GO:0005881(cytoplasmic microtubule);GO:0015630(microtubule cytoskeleton);GO:0097546(ciliary base);GO:0097731(9+0 non-motile cilium);GO:0097731(9+0 non-motile cilium)	NA	enkurin domain containing 1 [Source:HGNC Symbol;Acc:HGNC:25246]	protein_coding;processed_transcript;retained_intron	0.309307	0.278106	0.277253	0.178586	1.17871	1.33456	2.13422e-05	0.00081585
ENSG00000254166	CASC19	ENST00000500112;ENST00000642088;ENST00000664744;ENST00000641588;ENST00000641487;ENST00000641028;ENST00000642076;ENST00000641153;ENST00000641853;ENST00000641421;ENST00000641912;ENST00000641392;ENST00000641965;ENST00000641523;ENST00000641701;ENST00000641425;ENST00000641480;ENST00000641919	NA	NA	cancer susceptibility 19 [Source:HGNC Symbol;Acc:HGNC:49476]	lncRNA;retained_intron	0.101062	0.0985244	0.0680821	0.0207145	0	0.00529531	2.28371e-05	0.000870774
ENSG00000077279	DCX	ENST00000358070	GO:0001764(neuron migration);GO:0005515(protein binding);GO:0005737(cytoplasm);GO:0005829(cytosol);GO:0005856(cytoskeleton);GO:0005874(microtubule);GO:0005875(microtubule associated complex);GO:0005930(axoneme);GO:0007399(nervous system development);GO:0007417(central nervous system development);GO:0007420(brain development);GO:0008017(microtubule binding);GO:0019901(protein kinase binding);GO:00…	NA	doublecortin [Source:HGNC Symbol;Acc:HGNC:2714]	protein_coding	0.03295	0.0558174	0.0149281	0.0259151	0.251411	0.173699	2.31255e-05	0.000879531
ENSG00000140988	RPS2	ENST00000533186;ENST00000530225;ENST00000533872;ENST00000531065;ENST00000343262;ENST00000527302;ENST00000526586;ENST00000534461;ENST00000529806;ENST00000527871;ENST00000526522;ENST00000526908;ENST00000533161;ENST00000527826;ENST00000532746;ENST00000563194	GO:0002181(cytoplasmic translation);GO:0003723(RNA binding);GO:0003729(mRNA binding);GO:0003735(structural constituent of ribosome);GO:0005515(protein binding);GO:0005634(nucleus);GO:0005654(nucleoplasm);GO:0005737(cytoplasm);GO:0005829(cytosol);GO:0005840(ribosome);GO:0005925(focal adhesion);GO:0006412(translation);GO:0015935(small ribosomal subunit);GO:0016020(membrane);GO:0017134(fibroblast gr…	03010(Ribosome);05171(Coronavirus disease - COVID-19);05171(Coronavirus disease - COVID-19)	ribosomal protein S2 [Source:HGNC Symbol;Acc:HGNC:10404]	protein_coding;retained_intron;nonsense_mediated_decay	2121.72	1569	2207.46	1528.84	589.062	906.362	2.42546e-05	0.00092014
ENSG00000213015	ZNF580	ENST00000325333;ENST00000543039;ENST00000592881;ENST00000590190;ENST00000592461;ENST00000545125	GO:0000785(chromatin);GO:0000978(RNA polymerase II cis-regulatory region sequence-specific DNA binding);GO:0000981(DNA-binding transcription factor activity, RNA polymerase II-specific);GO:0001228(DNA-binding transcription activator activity, RNA polymerase II-specific);GO:0001938(positive regulation of endothelial cell proliferation);GO:0002690(positive regulation of leukocyte chemotaxis);GO:000…	NA	zinc finger protein 580 [Source:HGNC Symbol;Acc:HGNC:29473]	protein_coding	6.73387	4.22858	6.66046	3.87943	0.877551	1.62558	2.44443e-05	0.000924995
ENSG00000106688	SLC1A1	ENST00000262352	GO:0001662(behavioral fear response);GO:0001932(regulation of protein phosphorylation);GO:0001975(response to amphetamine);GO:0002027(regulation of heart rate);GO:0005253(anion channel activity);GO:0005313(L-glutamate transmembrane transporter activity);GO:0005314(high-affinity L-glutamate transmembrane transporter activity);GO:0005515(protein binding);GO:0005737(cytoplasm);GO:0005768(endosome);G…	04721(Synaptic vesicle cycle);04724(Glutamatergic synapse);04974(Protein digestion and absorption)	solute carrier family 1 member 1 [Source:HGNC Symbol;Acc:HGNC:10939]	protein_coding	3.31675	3.54939	4.57736	4.04573	1.15061	1.33239	2.5547e-05	0.000963471
ENSG00000198732	SMOC1	ENST00000381280;ENST00000361956;ENST00000557483;ENST00000553839	GO:0001654(eye development);GO:0005509(calcium ion binding);GO:0005515(protein binding);GO:0005576(extracellular region);GO:0005604(basement membrane);GO:0005615(extracellular space);GO:0008201(heparin binding);GO:0030154(cell differentiation);GO:0030198(extracellular matrix organization);GO:0045667(regulation of osteoblast differentiation);GO:0046872(metal ion binding);GO:0050840(extracellular m…	NA	SPARC related modular calcium binding 1 [Source:HGNC Symbol;Acc:HGNC:20318]	protein_coding;retained_intron	1.10882	1.09061	0.907268	0.59047	0.228426	0.141985	2.55897e-05	0.000963471
ENSG00000213221	DNLZ	ENST00000371738;ENST00000371739	GO:0005654(nucleoplasm);GO:0005739(mitochondrion);GO:0006457(protein folding);GO:0008270(zinc ion binding);GO:0030150(protein import into mitochondrial matrix);GO:0046872(metal ion binding);GO:0050821(protein stabilization);GO:0051087(chaperone binding);GO:0051087(chaperone binding)	NA	DNL-type zinc finger [Source:HGNC Symbol;Acc:HGNC:33879]	protein_coding	2.87509	2.60285	3.2264	2.03439	0.304923	0.775865	2.73232e-05	0.00102616
ENSG00000129226	CD68	ENST00000250092;ENST00000584180;ENST00000380498	GO:0002437(inflammatory response to antigenic stimulus);GO:0002605(negative regulation of dendritic cell antigen processing and presentation);GO:0005515(protein binding);GO:0005737(cytoplasm);GO:0005764(lysosome);GO:0005765(lysosomal membrane);GO:0005768(endosome);GO:0005886(plasma membrane);GO:0007568(aging);GO:0010008(endosome membrane);GO:0016020(membrane);GO:0016021(integral component of memb…	04142(Lysosome);04142(Lysosome)	CD68 molecule [Source:HGNC Symbol;Acc:HGNC:1693]	protein_coding	2.0266	1.18863	0.848412	0.233397	0.00483514	0.139091	2.75684e-05	0.00103278
ENSG00000125901	MRPS26	ENST00000380325	GO:0003723(RNA binding);GO:0005654(nucleoplasm);GO:0005739(mitochondrion);GO:0005743(mitochondrial inner membrane);GO:0005763(mitochondrial small ribosomal subunit);GO:0005840(ribosome);GO:0032543(mitochondrial translation)	NA	mitochondrial ribosomal protein S26 [Source:HGNC Symbol;Acc:HGNC:14045]	protein_coding	42.3168	33.5829	38.2783	30.4399	10.1722	15.1411	3.10015e-05	0.0011585
ENSG00000104368	PLAT	ENST00000220809;ENST00000677722;ENST00000521647;ENST00000679151;ENST00000522812;ENST00000524261	GO:0001666(response to hypoxia);GO:0004252(serine-type endopeptidase activity);GO:0005102(signaling receptor binding);GO:0005515(protein binding);GO:0005576(extracellular region);GO:0005615(extracellular space);GO:0005737(cytoplasm);GO:0005786(signal recognition particle, endoplasmic reticulum targeting);GO:0006508(proteolysis);GO:0006617(SRP-dependent cotranslational protein targeting to membran…	04371(Apelin signaling pathway);04610(Complement and coagulation cascades);05202(Transcriptional misregulation in cancer);05215(Prostate cancer);05418(Fluid shear stress and atherosclerosis);05418(Fluid shear stress and atherosclerosis)	plasminogen activator, tissue type [Source:HGNC Symbol;Acc:HGNC:9051]	protein_coding;retained_intron	0.936714	0.7247	0.292333	0.28829	0.152546	0.213889	3.16539e-05	0.00117994
ENSG00000022267	FHL1	ENST00000543669;ENST00000618438;ENST00000651929;ENST00000477080;ENST00000394155;ENST00000651089;ENST00000630677;ENST00000449474	GO:0003254(regulation of membrane depolarization);GO:0003674(molecular_function);GO:0005515(protein binding);GO:0005634(nucleus);GO:0005737(cytoplasm);GO:0005829(cytosol);GO:0005886(plasma membrane);GO:0005925(focal adhesion);GO:0007517(muscle organ development);GO:0009887(animal organ morphogenesis);GO:0010972(negative regulation of G2/M transition of mitotic cell cycle);GO:0030154(cell differen…	04630(JAK-STAT signaling pathway);04630(JAK-STAT signaling pathway)	four and a half LIM domains 1 [Source:HGNC Symbol;Acc:HGNC:3702]	protein_coding;retained_intron	3.95203	3.49662	3.38045	2.68054	8.1863	7.14364	3.22212e-05	0.0011981
ENSG00000124370	MCEE	ENST00000494660;ENST00000244217;ENST00000486135;ENST00000413592;ENST00000462609	GO:0004493(methylmalonyl-CoA epimerase activity);GO:0005515(protein binding);GO:0005739(mitochondrion);GO:0005759(mitochondrial matrix);GO:0016853(isomerase activity);GO:0019626(short-chain fatty acid catabolic process);GO:0046491(L-methylmalonyl-CoA metabolic process);GO:0046872(metal ion binding);GO:0046872(metal ion binding)	00280(Valine, leucine and isoleucine degradation);00630(Glyoxylate and dicarboxylate metabolism);00640(Propanoate metabolism);01100(Metabolic pathways);01200(Carbon metabolism);01200(Carbon metabolism)	methylmalonyl-CoA epimerase [Source:HGNC Symbol;Acc:HGNC:16732]	protein_coding;processed_transcript	4.17018	2.8907	2.89313	2.54009	7.42383	10.6046	3.24498e-05	0.00120362
ENSG00000182379	NXPH4	ENST00000349394;ENST00000556415;ENST00000555154	GO:0003674(molecular_function);GO:0005102(signaling receptor binding);GO:0005575(cellular_component);GO:0005576(extracellular region);GO:0007218(neuropeptide signaling pathway);GO:0007218(neuropeptide signaling pathway)	NA	neurexophilin 4 [Source:HGNC Symbol;Acc:HGNC:8078]	protein_coding;nonsense_mediated_decay;processed_transcript	10.597	7.86944	10.3462	6.99399	2.53884	3.04135	3.28767e-05	0.00121644
ENSG00000131187	F12	ENST00000696193;ENST00000510358;ENST00000504406;ENST00000502854;ENST00000696195;ENST00000514943;ENST00000696192	GO:0002353(plasma kallikrein-kinin cascade);GO:0002542(Factor XII activation);GO:0004252(serine-type endopeptidase activity);GO:0005509(calcium ion binding);GO:0005515(protein binding);GO:0005576(extracellular region);GO:0005615(extracellular space);GO:0005791(rough endoplasmic reticulum);GO:0005886(plasma membrane);GO:0006508(proteolysis);GO:0007596(blood coagulation);GO:0007597(blood coagulatio…	04610(Complement and coagulation cascades);04610(Complement and coagulation cascades)	coagulation factor XII [Source:HGNC Symbol;Acc:HGNC:3530]	nonsense_mediated_decay;retained_intron;processed_transcript	1.51376	1.23815	2.49891	1.28145	0.350716	0.459526	3.43502e-05	0.00126783
ENSG00000147813	NAPRT	ENST00000340490;ENST00000464332;ENST00000435154;ENST00000498076;ENST00000449291;ENST00000480946;ENST00000529179;ENST00000491904;ENST00000462059;ENST00000488096;ENST00000525583;ENST00000460623;ENST00000426292	GO:0004514(nicotinate-nucleotide diphosphorylase (carboxylating) activity);GO:0004516(nicotinate phosphoribosyltransferase activity);GO:0005515(protein binding);GO:0005576(extracellular region);GO:0005737(cytoplasm);GO:0005829(cytosol);GO:0006979(response to oxidative stress);GO:0009435(NAD biosynthetic process);GO:0016740(transferase activity);GO:0016757(glycosyltransferase activity);GO:0016874(…	00760(Nicotinate and nicotinamide metabolism);01100(Metabolic pathways);01240(Biosynthesis of cofactors);01240(Biosynthesis of cofactors)	nicotinate phosphoribosyltransferase [Source:HGNC Symbol;Acc:HGNC:30450]	non_stop_decay;retained_intron;protein_coding;nonsense_mediated_decay	1.3371	1.50331	0.772093	1.42244	3.25673	4.93474	3.44998e-05	0.00127022
ENSG00000163638	ADAMTS9	ENST00000498707;ENST00000459780;ENST00000477180;ENST00000475557;ENST00000295903;ENST00000482490	GO:0003179(heart valve morphogenesis);GO:0003229(ventricular cardiac muscle tissue development);GO:0004175(endopeptidase activity);GO:0004222(metalloendopeptidase activity);GO:0005576(extracellular region);GO:0005615(extracellular space);GO:0005783(endoplasmic reticulum);GO:0006508(proteolysis);GO:0008233(peptidase activity);GO:0008237(metallopeptidase activity);GO:0008270(zinc ion binding);GO:00…	NA	ADAM metallopeptidase with thrombospondin type 1 motif 9 [Source:HGNC Symbol;Acc:HGNC:13202]	protein_coding;retained_intron	0.353536	0.28001	0.389754	0.414625	1.9604	0.653872	3.48893e-05	0.00128141
ENSG00000161638	ITGA5	ENST00000293379;ENST00000552387;ENST00000550141;ENST00000552564;ENST00000549601;ENST00000552583;ENST00000551861;ENST00000552431;ENST00000551564	GO:0001525(angiogenesis);GO:0001618(virus receptor activity);GO:0001726(ruffle);GO:0005154(epidermal growth factor receptor binding);GO:0005161(platelet-derived growth factor receptor binding);GO:0005178(integrin binding);GO:0005515(protein binding);GO:0005737(cytoplasm);GO:0005783(endoplasmic reticulum);GO:0005794(Golgi apparatus);GO:0005886(plasma membrane);GO:0005911(cell-cell junction);GO:000…	04145(Phagosome);04151(PI3K-Akt signaling pathway);04510(Focal adhesion);04512(ECM-receptor interaction);04640(Hematopoietic cell lineage);04810(Regulation of actin cytoskeleton);05100(Bacterial invasion of epithelial cells);05131(Shigellosis);05133(Pertussis);05135(Yersinia infection);05165(Human papillomavirus infection);05168(Herpes simplex virus 1 infection);05205(Proteoglycans in cancer);052…	integrin subunit alpha 5 [Source:HGNC Symbol;Acc:HGNC:6141]	protein_coding;retained_intron	4.75998	3.59626	1.44272	1.77396	1.75334	1.19391	3.56186e-05	0.001305
ENSG00000161955	TNFSF13	ENST00000338784;ENST00000380535;ENST00000349228;ENST00000396545;ENST00000483039;ENST00000396542;ENST00000436057;ENST00000438470	GO:0002376(immune system process);GO:0005102(signaling receptor binding);GO:0005125(cytokine activity);GO:0005164(tumor necrosis factor receptor binding);GO:0005515(protein binding);GO:0005576(extracellular region);GO:0005615(extracellular space);GO:0005654(nucleoplasm);GO:0005737(cytoplasm);GO:0005829(cytosol);GO:0006955(immune response);GO:0007154(cell communication);GO:0007165(signal transduct…	04060(Cytokine-cytokine receptor interaction);04672(Intestinal immune network for IgA production);05323(Rheumatoid arthritis);05323(Rheumatoid arthritis)	TNF superfamily member 13 [Source:HGNC Symbol;Acc:HGNC:11928]	protein_coding	6.45154	6.54773	5.99001	5.59808	1.70704	2.14033	3.59145e-05	0.00131263
ENSG00000082482	KCNK2	ENST00000444842;ENST00000486921;ENST00000391894;ENST00000474771;ENST00000467031;ENST00000470177	GO:0003231(cardiac ventricle development);GO:0005249(voltage-gated potassium channel activity);GO:0005267(potassium channel activity);GO:0005634(nucleus);GO:0005783(endoplasmic reticulum);GO:0005789(endoplasmic reticulum membrane);GO:0005886(plasma membrane);GO:0005887(integral component of plasma membrane);GO:0006811(ion transport);GO:0006813(potassium ion transport);GO:0007186(G protein-coupled…	04927(Cortisol synthesis and secretion);04934(Cushing syndrome);04971(Gastric acid secretion);04971(Gastric acid secretion)	potassium two pore domain channel subfamily K member 2 [Source:HGNC Symbol;Acc:HGNC:6277]	protein_coding;nonsense_mediated_decay	0.144264	0.161476	0.538786	1.04997	1.40944	0.621014	3.68859e-05	0.00134485
ENSG00000273619	ENSG00000273619	ENST00000610979	NA	NA	novel transcript, antisense to RPS21	lncRNA	9.60795	4.92695	5.39867	2.07283	1.06105	0.810143	3.70612e-05	0.00134797
ENSG00000198074	AKR1B10	ENST00000359579	GO:0001523(retinoid metabolic process);GO:0001758(retinal dehydrogenase activity);GO:0004032(alditol:NADP+ 1-oxidoreductase activity);GO:0004033(aldo-keto reductase (NADP) activity);GO:0005515(protein binding);GO:0005576(extracellular region);GO:0005739(mitochondrion);GO:0005764(lysosome);GO:0005829(cytosol);GO:0006629(lipid metabolic process);GO:0008106(alcohol dehydrogenase (NADP+) activity);GO…	00040(Pentose and glucuronate interconversions);00051(Fructose and mannose metabolism);00052(Galactose metabolism);00561(Glycerolipid metabolism);00790(Folate biosynthesis);01100(Metabolic pathways)	aldo-keto reductase family 1 member B10 [Source:HGNC Symbol;Acc:HGNC:382]	protein_coding	0.710503	0.655842	0.545716	0.442185	0.0405663	0	3.72912e-05	0.00135032
ENSG00000146013	GFRA3	ENST00000274721	GO:0001764(neuron migration);GO:0005102(signaling receptor binding);GO:0005515(protein binding);GO:0005829(cytosol);GO:0005886(plasma membrane);GO:0007165(signal transduction);GO:0007399(nervous system development);GO:0007411(axon guidance);GO:0007422(peripheral nervous system development);GO:0008046(axon guidance receptor activity);GO:0009897(external side of plasma membrane);GO:0016020(membrane…	NA	GDNF family receptor alpha 3 [Source:HGNC Symbol;Acc:HGNC:4245]	protein_coding	4.13126	5.68431	3.94346	3.88606	1.25233	1.24265	3.73063e-05	0.00135032
ENSG00000080224	EPHA6	ENST00000389672;ENST00000470610;ENST00000477384;ENST00000506569	GO:0000166(nucleotide binding);GO:0003674(molecular_function);GO:0004672(protein kinase activity);GO:0004712(protein serine/threonine/tyrosine kinase activity);GO:0004713(protein tyrosine kinase activity);GO:0004714(transmembrane receptor protein tyrosine kinase activity);GO:0005003(ephrin receptor activity);GO:0005005(transmembrane-ephrin receptor activity);GO:0005515(protein binding);GO:0005524…	04360(Axon guidance);04360(Axon guidance)	EPH receptor A6 [Source:HGNC Symbol;Acc:HGNC:19296]	protein_coding;nonsense_mediated_decay	0.222881	0.267137	0.282136	0.364229	0.901327	0.677237	3.7657e-05	0.00135974
ENSG00000105559	PLEKHA4	ENST00000263265;ENST00000593696;ENST00000355496;ENST00000601146;ENST00000597406;ENST00000594100;ENST00000595867;ENST00000597129;ENST00000596982	GO:0005515(protein binding);GO:0005546(phosphatidylinositol-4,5-bisphosphate binding);GO:0005737(cytoplasm);GO:0005886(plasma membrane);GO:0008289(lipid binding);GO:0016020(membrane);GO:0031234(extrinsic component of cytoplasmic side of plasma membrane);GO:0032266(phosphatidylinositol-3-phosphate binding);GO:0042802(identical protein binding);GO:0043325(phosphatidylinositol-3,4-bisphosphate bindi…	NA	pleckstrin homology domain containing A4 [Source:HGNC Symbol;Acc:HGNC:14339]	protein_coding;retained_intron;nonsense_mediated_decay	4.18614	4.60348	3.26846	3.7045	1.33385	1.25735	3.90523e-05	0.00140673
ENSG00000124302	CHST8	ENST00000434302;ENST00000438847;ENST00000650847;ENST00000604556;ENST00000591231	GO:0000139(Golgi membrane);GO:0001537(N-acetylgalactosamine 4-O-sulfotransferase activity);GO:0005515(protein binding);GO:0005794(Golgi apparatus);GO:0005975(carbohydrate metabolic process);GO:0006790(sulfur compound metabolic process);GO:0007417(central nervous system development);GO:0008146(sulfotransferase activity);GO:0016020(membrane);GO:0016021(integral component of membrane);GO:0016051(car…	00513(Various types of N-glycan biosynthesis);01100(Metabolic pathways);01100(Metabolic pathways)	carbohydrate sulfotransferase 8 [Source:HGNC Symbol;Acc:HGNC:15993]	protein_coding;processed_transcript	3.10791	3.14748	3.18754	2.83163	0.800942	0.957736	3.97698e-05	0.00142914
ENSG00000109814	UGDH	ENST00000506179;ENST00000503779;ENST00000507089;ENST00000316423;ENST00000515021;ENST00000501493;ENST00000509391;ENST00000515398;ENST00000514106;ENST00000510881;ENST00000505698;ENST00000510490	GO:0001702(gastrulation with mouth forming second);GO:0003824(catalytic activity);GO:0003979(UDP-glucose 6-dehydrogenase activity);GO:0005634(nucleus);GO:0005654(nucleoplasm);GO:0005829(cytosol);GO:0005975(carbohydrate metabolic process);GO:0006024(glycosaminoglycan biosynthetic process);GO:0006065(UDP-glucuronate biosynthetic process);GO:0008152(metabolic process);GO:0015012(heparan sulfate prot…	00040(Pentose and glucuronate interconversions);00053(Ascorbate and aldarate metabolism);00520(Amino sugar and nucleotide sugar metabolism);01100(Metabolic pathways);01240(Biosynthesis of cofactors);01240(Biosynthesis of cofactors)	UDP-glucose 6-dehydrogenase [Source:HGNC Symbol;Acc:HGNC:12525]	protein_coding;nonsense_mediated_decay;processed_transcript	74.9905	97.2773	179.016	169.244	228.862	197.524	4.12225e-05	0.0014778
ENSG00000136243	NUP42	ENST00000258742;ENST00000477844;ENST00000410002;ENST00000487595;ENST00000437140;ENST00000485250;ENST00000497500;ENST00000489145;ENST00000438012	GO:0003723(RNA binding);GO:0005049(nuclear export signal receptor activity);GO:0005515(protein binding);GO:0005634(nucleus);GO:0005635(nuclear envelope);GO:0005643(nuclear pore);GO:0005654(nucleoplasm);GO:0005829(cytosol);GO:0006611(protein export from nucleus);GO:0006913(nucleocytoplasmic transport);GO:0015031(protein transport);GO:0016020(membrane);GO:0031965(nuclear membrane);GO:0046872(metal …	03013(RNA transport);03013(RNA transport)	nucleoporin 42 [Source:HGNC Symbol;Acc:HGNC:17010]	protein_coding;retained_intron;processed_transcript;nonsense_mediated_decay	1.5598	1.66639	0.762208	0.906709	3.08277	2.90321	4.13558e-05	0.00147904
ENSG00000229391	HLA-DRB6	ENST00000411500;ENST00000437183;ENST00000437650	NA	NA	major histocompatibility complex, class II, DR beta 6 (pseudogene) [Source:HGNC Symbol;Acc:HGNC:4954]	processed_transcript;transcribed_unprocessed_pseudogene	3.13808	4.01569	1.45998	1.28113	0.703327	0.652902	4.26052e-05	0.00152009
ENSG00000051128	HOMER3	ENST00000392351;ENST00000539827;ENST00000599097;ENST00000433218;ENST00000542541;ENST00000595756;ENST00000600077;ENST00000596482;ENST00000594439;ENST00000599808	GO:0005515(protein binding);GO:0005575(cellular_component);GO:0005737(cytoplasm);GO:0005829(cytosol);GO:0005886(plasma membrane);GO:0006605(protein targeting);GO:0007216(G protein-coupled glutamate receptor signaling pathway);GO:0008022(protein C-terminus binding);GO:0014069(postsynaptic density);GO:0019904(protein domain specific binding);GO:0030054(cell junction);GO:0030425(dendrite);GO:0032703…	04068(FoxO signaling pathway);04724(Glutamatergic synapse);04724(Glutamatergic synapse)	homer scaffold protein 3 [Source:HGNC Symbol;Acc:HGNC:17514]	protein_coding;retained_intron	9.15878	7.91278	4.59625	3.91968	2.62036	3.04618	4.28233e-05	0.00152425
ENSG00000104881	PPP1R13L	ENST00000360957;ENST00000418234;ENST00000587270;ENST00000585905;ENST00000591986;ENST00000592134;ENST00000589858;ENST00000593226;ENST00000589371	GO:0000122(negative regulation of transcription by RNA polymerase II);GO:0003215(cardiac right ventricle morphogenesis);GO:0003229(ventricular cardiac muscle tissue development);GO:0003714(transcription corepressor activity);GO:0005515(protein binding);GO:0005634(nucleus);GO:0005654(nucleoplasm);GO:0005737(cytoplasm);GO:0005829(cytosol);GO:0006355(regulation of DNA-templated transcription);GO:000…	NA	protein phosphatase 1 regulatory subunit 13 like [Source:HGNC Symbol;Acc:HGNC:18838]	protein_coding;retained_intron	11.5768	12.0816	9.74969	12.753	4.48642	4.64645	4.35783e-05	0.00154744
ENSG00000152475	ZNF837	ENST00000427624;ENST00000597582	GO:0000978(RNA polymerase II cis-regulatory region sequence-specific DNA binding);GO:0000981(DNA-binding transcription factor activity, RNA polymerase II-specific);GO:0003677(DNA binding);GO:0005515(protein binding);GO:0005634(nucleus);GO:0006357(regulation of transcription by RNA polymerase II);GO:0042802(identical protein binding);GO:0046872(metal ion binding);GO:0046872(metal ion binding)	NA	zinc finger protein 837 [Source:HGNC Symbol;Acc:HGNC:25164]	protein_coding	2.7204	1.71947	2.35066	1.46289	0.491309	0.30623	4.38815e-05	0.00155453
ENSG00000203811	H3C14	ENST00000369158	GO:0000785(chromatin);GO:0000786(nucleosome);GO:0003677(DNA binding);GO:0005515(protein binding);GO:0005576(extracellular region);GO:0005634(nucleus);GO:0005654(nucleoplasm);GO:0005694(chromosome);GO:0006334(nucleosome assembly);GO:0030527(structural constituent of chromatin);GO:0046982(protein heterodimerization activity);GO:0070062(extracellular exosome)	05034(Alcoholism);05131(Shigellosis);05202(Transcriptional misregulation in cancer);05322(Systemic lupus erythematosus)	H3 clustered histone 14 [Source:HGNC Symbol;Acc:HGNC:20503]	protein_coding	2.43625	0.931745	8.32669	5.06952	0.678777	1.06682	4.41421e-05	0.00156007
ENSG00000278233	RNA5-8SN2	ENST00000612463	GO:0003735(structural constituent of ribosome);GO:0005840(ribosome)	03008(Ribosome biogenesis in eukaryotes);03010(Ribosome)	RNA, 5.8S ribosomal N2 [Source:HGNC Symbol;Acc:HGNC:53521]	rRNA	6.68105	4.14125	10.0654	10.7717	0.719507	0.527108	4.66939e-05	0.00164251
ENSG00000170442	KRT86	ENST00000293525;ENST00000423955;ENST00000553310	GO:0005515(protein binding);GO:0005615(extracellular space);GO:0005829(cytosol);GO:0005882(intermediate filament);GO:0030280(structural constituent of skin epidermis);GO:0031424(keratinization);GO:0045095(keratin filament);GO:0045109(intermediate filament organization);GO:0045109(intermediate filament organization)	NA	keratin 86 [Source:HGNC Symbol;Acc:HGNC:6463]	protein_coding	7.11904	3.6016	5.30289	4.10772	1.17693	1.47918	4.68747e-05	0.00164501
ENSG00000128739	SNRPN	ENST00000390687;ENST00000554227;ENST00000645002;ENST00000584968;ENST00000553597;ENST00000642807;ENST00000577565	GO:0000398(mRNA splicing, via spliceosome);GO:0003723(RNA binding);GO:0005515(protein binding);GO:0005634(nucleus);GO:0005654(nucleoplasm);GO:0005681(spliceosomal complex);GO:0005682(U5 snRNP);GO:0005685(U1 snRNP);GO:0005686(U2 snRNP);GO:0005687(U4 snRNP);GO:0005737(cytoplasm);GO:0008380(RNA splicing);GO:0030532(small nuclear ribonucleoprotein complex);GO:0046540(U4/U6 x U5 tri-snRNP complex);GO:…	NA	small nuclear ribonucleoprotein polypeptide N [Source:HGNC Symbol;Acc:HGNC:11164]	protein_coding;processed_transcript	0.302922	0.348588	0.408148	0.431921	1.63523	1.13522	4.73632e-05	0.00165827
ENSG00000179862	CITED4	ENST00000372638	GO:0003713(transcription coactivator activity);GO:0005634(nucleus);GO:0005654(nucleoplasm);GO:0005737(cytoplasm);GO:0006355(regulation of DNA-templated transcription);GO:0043627(response to estrogen);GO:0045893(positive regulation of DNA-templated transcription)	NA	Cbp/p300 interacting transactivator with Glu/Asp rich carboxy-terminal domain 4 [Source:HGNC Symbol;Acc:HGNC:18696]	protein_coding	8.63135	5.54069	9.21612	3.13417	0.96935	1.5356	4.9244e-05	0.0017192
ENSG00000176406	RIMS2	ENST00000436393;ENST00000668113;ENST00000696799;ENST00000523362;ENST00000512598;ENST00000515551;ENST00000666250;ENST00000511046;ENST00000507677	GO:0005515(protein binding);GO:0005886(plasma membrane);GO:0006886(intracellular protein transport);GO:0006887(exocytosis);GO:0007188(adenylate cyclase-modulating G protein-coupled receptor signaling pathway);GO:0016020(membrane);GO:0017156(calcium-ion regulated exocytosis);GO:0017157(regulation of exocytosis);GO:0030054(cell junction);GO:0030073(insulin secretion);GO:0030154(cell differentiation…	04911(Insulin secretion);04911(Insulin secretion)	regulating synaptic membrane exocytosis 2 [Source:HGNC Symbol;Acc:HGNC:17283]	protein_coding;retained_intron;nonsense_mediated_decay	0.40638	0.506586	0.919919	1.43578	0.380454	0.168228	4.93329e-05	0.0017192
ENSG00000203852	H3C15	ENST00000403683	GO:0000785(chromatin);GO:0000786(nucleosome);GO:0003677(DNA binding);GO:0005515(protein binding);GO:0005576(extracellular region);GO:0005634(nucleus);GO:0005654(nucleoplasm);GO:0005694(chromosome);GO:0006334(nucleosome assembly);GO:0030527(structural constituent of chromatin);GO:0046982(protein heterodimerization activity);GO:0070062(extracellular exosome)	05034(Alcoholism);05131(Shigellosis);05202(Transcriptional misregulation in cancer);05322(Systemic lupus erythematosus)	H3 clustered histone 15 [Source:HGNC Symbol;Acc:HGNC:20505]	protein_coding	2.49564	0.935586	8.39025	5.1061	0.679595	1.07293	4.9582e-05	0.00172064
ENSG00000188833	ENTPD8	ENST00000461823;ENST00000371506;ENST00000344119;ENST00000493135	GO:0000166(nucleotide binding);GO:0004382(GDP phosphatase activity);GO:0005515(protein binding);GO:0005524(ATP binding);GO:0005886(plasma membrane);GO:0009124(nucleoside monophosphate biosynthetic process);GO:0009133(nucleoside diphosphate biosynthetic process);GO:0009134(nucleoside diphosphate catabolic process);GO:0016020(membrane);GO:0016021(integral component of membrane);GO:0016787(hydrolase…	00230(Purine metabolism);00240(Pyrimidine metabolism);01100(Metabolic pathways);05169(Epstein-Barr virus infection);05169(Epstein-Barr virus infection)	ectonucleoside triphosphate diphosphohydrolase 8 [Source:HGNC Symbol;Acc:HGNC:24860]	retained_intron;protein_coding	9.01863	5.48598	3.62724	2.52016	2.24553	1.91313	4.96039e-05	0.00172064
ENSG00000133247	KMT5C	ENST00000630497;ENST00000445196;ENST00000402499;ENST00000255613;ENST00000498738;ENST00000468951;ENST00000474492;ENST00000592631;ENST00000464185;ENST00000589338;ENST00000460956	GO:0000779(condensed chromosome, centromeric region);GO:0000792(heterochromatin);GO:0003682(chromatin binding);GO:0005515(protein binding);GO:0005634(nucleus);GO:0005654(nucleoplasm);GO:0005694(chromosome);GO:0005721(pericentric heterochromatin);GO:0006281(DNA repair);GO:0006325(chromatin organization);GO:0008168(methyltransferase activity);GO:0016571(histone methylation);GO:0016740(transferase a…	00310(Lysine degradation);01100(Metabolic pathways);01100(Metabolic pathways)	lysine methyltransferase 5C [Source:HGNC Symbol;Acc:HGNC:28405]	protein_coding;nonsense_mediated_decay;processed_transcript;retained_intron	7.79958	7.12429	8.46963	6.6706	2.69515	3.03428	5.03706e-05	0.0017432
ENSG00000167925	GHDC	ENST00000301671;ENST00000428494;ENST00000587427;ENST00000585735;ENST00000588352;ENST00000585375	GO:0003674(molecular_function);GO:0005576(extracellular region);GO:0005634(nucleus);GO:0005635(nuclear envelope);GO:0005737(cytoplasm);GO:0005783(endoplasmic reticulum);GO:0008150(biological_process);GO:0016020(membrane);GO:0016881(acid-amino acid ligase activity);GO:0034774(secretory granule lumen);GO:0035580(specific granule lumen);GO:0035580(specific granule lumen)	NA	GH3 domain containing [Source:HGNC Symbol;Acc:HGNC:24438]	protein_coding;retained_intron	0	0.0346261	0.0838347	0.0715734	0.564593	0.306448	5.07454e-05	0.00175212
ENSG00000050628	PTGER3	ENST00000370924;ENST00000306666;ENST00000370931;ENST00000497146;ENST00000628037	GO:0004930(G protein-coupled receptor activity);GO:0004955(prostaglandin receptor activity);GO:0004957(prostaglandin E receptor activity);GO:0005635(nuclear envelope);GO:0005886(plasma membrane);GO:0005887(integral component of plasma membrane);GO:0006954(inflammatory response);GO:0007165(signal transduction);GO:0007186(G protein-coupled receptor signaling pathway);GO:0007189(adenylate cyclase-ac…	04020(Calcium signaling pathway);04024(cAMP signaling pathway);04080(Neuroactive ligand-receptor interaction);04923(Regulation of lipolysis in adipocytes);05163(Human cytomegalovirus infection);05200(Pathways in cancer);05200(Pathways in cancer)	prostaglandin E receptor 3 [Source:HGNC Symbol;Acc:HGNC:9595]	protein_coding;nonsense_mediated_decay	0.0870767	0.0652922	0.456044	0.257878	0.484781	0.334762	5.1996e-05	0.00179117
ENSG00000091513	TF	ENST00000402696;ENST00000462495;ENST00000485977;ENST00000482271;ENST00000414694;ENST00000474287;ENST00000467842	GO:0001895(retina homeostasis);GO:0005515(protein binding);GO:0005576(extracellular region);GO:0005615(extracellular space);GO:0005768(endosome);GO:0005769(early endosome);GO:0005770(late endosome);GO:0005788(endoplasmic reticulum lumen);GO:0005886(plasma membrane);GO:0005905(clathrin-coated pit);GO:0006811(ion transport);GO:0006826(iron ion transport);GO:0006879(cellular iron ion homeostasis);GO…	04066(HIF-1 signaling pathway);04216(Ferroptosis);04978(Mineral absorption);04978(Mineral absorption)	transferrin [Source:HGNC Symbol;Acc:HGNC:11740]	protein_coding;retained_intron;nonsense_mediated_decay	0.0123422	0.00231494	0	0.00432624	0.0729268	0.0573452	5.26478e-05	0.00180947
ENSG00000171766	GATM	ENST00000396659;ENST00000558362;ENST00000558916;ENST00000561376;ENST00000675323;ENST00000560538;ENST00000559885;ENST00000458245;ENST00000558336;ENST00000561148;ENST00000674905;ENST00000675158;ENST00000675974	GO:0005515(protein binding);GO:0005737(cytoplasm);GO:0005739(mitochondrion);GO:0005743(mitochondrial inner membrane);GO:0005758(mitochondrial intermembrane space);GO:0006600(creatine metabolic process);GO:0006601(creatine biosynthetic process);GO:0007611(learning or memory);GO:0014889(muscle atrophy);GO:0015067(amidinotransferase activity);GO:0015068(glycine amidinotransferase activity);GO:001602…	00260(Glycine, serine and threonine metabolism);00330(Arginine and proline metabolism);01100(Metabolic pathways);01100(Metabolic pathways)	glycine amidinotransferase [Source:HGNC Symbol;Acc:HGNC:4175]	protein_coding;retained_intron;processed_transcript;nonsense_mediated_decay	0.450913	0.661694	0.538754	0.808396	0.151523	0.138019	5.5223e-05	0.00189363
ENSG00000136010	ALDH1L2	ENST00000258494;ENST00000652515;ENST00000549335;ENST00000548418;ENST00000550088	GO:0003824(catalytic activity);GO:0004029(aldehyde dehydrogenase (NAD+) activity);GO:0005515(protein binding);GO:0005654(nucleoplasm);GO:0005737(cytoplasm);GO:0005739(mitochondrion);GO:0005759(mitochondrial matrix);GO:0006635(fatty acid beta-oxidation);GO:0006730(one-carbon metabolic process);GO:0006740(NADPH regeneration);GO:0009058(biosynthetic process);GO:0009258(10-formyltetrahydrofolate cata…	00670(One carbon pool by folate);00670(One carbon pool by folate)	aldehyde dehydrogenase 1 family member L2 [Source:HGNC Symbol;Acc:HGNC:26777]	protein_coding;retained_intron;processed_transcript	0.933746	0.379094	2.06782	1.87674	0.42421	0.635353	5.5847e-05	0.00191066
ENSG00000107872	FBXL15	ENST00000425536;ENST00000369956;ENST00000457067;ENST00000432590	GO:0000086(G2/M transition of mitotic cell cycle);GO:0005515(protein binding);GO:0005737(cytoplasm);GO:0005829(cytosol);GO:0009953(dorsal/ventral pattern formation);GO:0016567(protein ubiquitination);GO:0019005(SCF ubiquitin ligase complex);GO:0030282(bone mineralization);GO:0030513(positive regulation of BMP signaling pathway);GO:0031146(SCF-dependent proteasomal ubiquitin-dependent protein cata…	NA	F-box and leucine rich repeat protein 15 [Source:HGNC Symbol;Acc:HGNC:28155]	protein_coding	6.16023	3.46145	6.43939	2.26343	0.624973	1.12419	5.79861e-05	0.00197264
ENSG00000134871	COL4A2	ENST00000360467;ENST00000648222;ENST00000649101;ENST00000463084;ENST00000619688;ENST00000649396;ENST00000650225;ENST00000483683;ENST00000462309;ENST00000617564;ENST00000478681;ENST00000480609	GO:0001525(angiogenesis);GO:0005201(extracellular matrix structural constituent);GO:0005515(protein binding);GO:0005576(extracellular region);GO:0005581(collagen trimer);GO:0005587(collagen type IV trimer);GO:0005604(basement membrane);GO:0005615(extracellular space);GO:0005788(endoplasmic reticulum lumen);GO:0006351(DNA-templated transcription);GO:0007568(aging);GO:0014823(response to activity);…	04151(PI3K-Akt signaling pathway);04510(Focal adhesion);04512(ECM-receptor interaction);04926(Relaxin signaling pathway);04933(AGE-RAGE signaling pathway in diabetic complications);04974(Protein digestion and absorption);05146(Amoebiasis);05165(Human papillomavirus infection);05200(Pathways in cancer);05222(Small cell lung cancer);05222(Small cell lung cancer)	collagen type IV alpha 2 chain [Source:HGNC Symbol;Acc:HGNC:2203]	protein_coding;retained_intron;processed_transcript	0.332904	0.257564	0.226336	0.155658	0.0441659	0.0693115	5.80538e-05	0.00197264
ENSG00000142544	CTU1	ENST00000421832	GO:0000049(tRNA binding);GO:0002097(tRNA wobble base modification);GO:0002098(tRNA wobble uridine modification);GO:0002143(tRNA wobble position uridine thiolation);GO:0002144(cytosolic tRNA wobble base thiouridylase complex);GO:0003723(RNA binding);GO:0005515(protein binding);GO:0005737(cytoplasm);GO:0005829(cytosol);GO:0008033(tRNA processing);GO:0016740(transferase activity);GO:0016779(nucleoti…	04122(Sulfur relay system)	cytosolic thiouridylase subunit 1 [Source:HGNC Symbol;Acc:HGNC:29590]	protein_coding	2.60292	2.42526	2.02006	2.29856	0.605652	0.559451	5.84502e-05	0.00198162
ENSG00000158050	DUSP2	ENST00000288943;ENST00000488952	GO:0001706(endoderm formation);GO:0004721(phosphoprotein phosphatase activity);GO:0004722(protein serine/threonine phosphatase activity);GO:0004725(protein tyrosine phosphatase activity);GO:0005515(protein binding);GO:0005634(nucleus);GO:0005654(nucleoplasm);GO:0005737(cytoplasm);GO:0006470(protein dephosphorylation);GO:0008138(protein tyrosine/serine/threonine phosphatase activity);GO:0008330(pr…	04010(MAPK signaling pathway);04010(MAPK signaling pathway)	dual specificity phosphatase 2 [Source:HGNC Symbol;Acc:HGNC:3068]	protein_coding;retained_intron	5.94744	5.4237	3.34617	3.17569	1.41923	1.57853	6.06455e-05	0.0020512
ENSG00000130222	GADD45G	ENST00000252506;ENST00000494726;ENST00000375769	GO:0005515(protein binding);GO:0005634(nucleus);GO:0005737(cytoplasm);GO:0006915(apoptotic process);GO:0030154(cell differentiation);GO:0043065(positive regulation of apoptotic process);GO:0046330(positive regulation of JNK cascade);GO:0051726(regulation of cell cycle);GO:0120162(positive regulation of cold-induced thermogenesis);GO:1900745(positive regulation of p38MAPK cascade);GO:1900745(posit…	04010(MAPK signaling pathway);04064(NF-kappa B signaling pathway);04068(FoxO signaling pathway);04110(Cell cycle);04115(p53 signaling pathway);04210(Apoptosis);04218(Cellular senescence);05169(Epstein-Barr virus infection);05200(Pathways in cancer);05202(Transcriptional misregulation in cancer);05210(Colorectal cancer);05212(Pancreatic cancer);05213(Endometrial cancer);05214(Glioma);05216(Thyroid…	growth arrest and DNA damage inducible gamma [Source:HGNC Symbol;Acc:HGNC:4097]	protein_coding;processed_transcript	6.31305	3.49164	3.80348	2.29551	0.388295	1.07468	6.07764e-05	0.0020512
ENSG00000100842	EFS	ENST00000216733;ENST00000351354;ENST00000429593	GO:0005515(protein binding);GO:0005737(cytoplasm);GO:0005886(plasma membrane);GO:0005925(focal adhesion);GO:0007155(cell adhesion);GO:0007169(transmembrane receptor protein tyrosine kinase signaling pathway);GO:0016477(cell migration);GO:0017124(SH3 domain binding);GO:0019904(protein domain specific binding);GO:0035556(intracellular signal transduction);GO:0090527(actin filament reorganization);G…	NA	embryonal Fyn-associated substrate [Source:HGNC Symbol;Acc:HGNC:16898]	protein_coding	0.23482	0.392998	0.613915	0.514596	0.0577558	0.0145795	6.1283e-05	0.00206365
ENSG00000016082	ISL1	ENST00000230658	GO:0000122(negative regulation of transcription by RNA polymerase II);GO:0000785(chromatin);GO:0000978(RNA polymerase II cis-regulatory region sequence-specific DNA binding);GO:0000981(DNA-binding transcription factor activity, RNA polymerase II-specific);GO:0000987(cis-regulatory region sequence-specific DNA binding);GO:0001228(DNA-binding transcription activator activity, RNA polymerase II-spec…	04550(Signaling pathways regulating pluripotency of stem cells)	ISL LIM homeobox 1 [Source:HGNC Symbol;Acc:HGNC:6132]	protein_coding	0.0399824	0.0734534	0	0.0597183	0.501723	0.679371	6.22797e-05	0.00209252
ENSG00000174485	DENND4A	ENST00000431932;ENST00000443035;ENST00000635620;ENST00000562540;ENST00000562028;ENST00000561863;ENST00000568515;ENST00000567323;ENST00000564674	GO:0003677(DNA binding);GO:0005085(guanyl-nucleotide exchange factor activity);GO:0005515(protein binding);GO:0005634(nucleus);GO:0005737(cytoplasm);GO:0005829(cytosol);GO:0006355(regulation of DNA-templated transcription);GO:0031410(cytoplasmic vesicle);GO:0032483(regulation of Rab protein signal transduction);GO:0050790(regulation of catalytic activity);GO:0050790(regulation of catalytic activi…	NA	DENN domain containing 4A [Source:HGNC Symbol;Acc:HGNC:24321]	protein_coding;retained_intron;processed_transcript	1.26682	1.47259	1.12074	2.0062	4.88301	2.88636	6.40161e-05	0.00214125
ENSG00000170961	HAS2	ENST00000303924	GO:0001570(vasculogenesis);GO:0001822(kidney development);GO:0005515(protein binding);GO:0005737(cytoplasm);GO:0005789(endoplasmic reticulum membrane);GO:0005794(Golgi apparatus);GO:0005886(plasma membrane);GO:0005887(integral component of plasma membrane);GO:0008284(positive regulation of cell population proliferation);GO:0010838(positive regulation of keratinocyte proliferation);GO:0014911(posi…	NA	hyaluronan synthase 2 [Source:HGNC Symbol;Acc:HGNC:4819]	protein_coding	0.171849	0.357369	0.627773	1.39179	0.024457	0.156755	6.39906e-05	0.00214125
ENSG00000179388	EGR3	ENST00000317216;ENST00000519492;ENST00000518773;ENST00000524088;ENST00000522910	GO:0000785(chromatin);GO:0000978(RNA polymerase II cis-regulatory region sequence-specific DNA binding);GO:0000981(DNA-binding transcription factor activity, RNA polymerase II-specific);GO:0001228(DNA-binding transcription activator activity, RNA polymerase II-specific);GO:0001938(positive regulation of endothelial cell proliferation);GO:0002042(cell migration involved in sprouting angiogenesis);…	04625(C-type lectin receptor signaling pathway);05161(Hepatitis B);05203(Viral carcinogenesis);05203(Viral carcinogenesis)	early growth response 3 [Source:HGNC Symbol;Acc:HGNC:3240]	protein_coding;processed_transcript	11.6273	11.0369	11.0073	13.582	5.00609	4.68416	6.49584e-05	0.00216588
ENSG00000112787	FBRSL1	ENST00000539264;ENST00000650108;ENST00000680143;ENST00000542061;ENST00000542306;ENST00000434748;ENST00000543360;ENST00000537804;ENST00000543453	GO:0003723(RNA binding);GO:0003723(RNA binding)	NA	fibrosin like 1 [Source:HGNC Symbol;Acc:HGNC:29308]	processed_transcript;protein_coding;retained_intron	7.08393	9.38243	6.81742	8.56498	2.9774	3.34476	6.50416e-05	0.00216588
ENSG00000224078	SNHG14	ENST00000640631;ENST00000665411;ENST00000549804;ENST00000656463;ENST00000660717;ENST00000557108;ENST00000551631;ENST00000670697;ENST00000546682;ENST00000656510;ENST00000660956;ENST00000551938	GO:0005730(nucleolus);GO:0006396(RNA processing);GO:0006396(RNA processing)	NA	small nucleolar RNA host gene 14 [Source:HGNC Symbol;Acc:HGNC:37462]	lncRNA;retained_intron	0.0038455	0.00240326	0.0017909	0.00214783	0.0150246	0.0171225	6.53926e-05	0.00217275
ENSG00000160256	SLX9	ENST00000291634;ENST00000397826;ENST00000479127;ENST00000458015;ENST00000485207	GO:0000462(maturation of SSU-rRNA from tricistronic rRNA transcript (SSU-rRNA, 5.8S rRNA, LSU-rRNA));GO:0005515(protein binding);GO:0005634(nucleus);GO:0005730(nucleolus);GO:0030686(90S preribosome);GO:0030688(preribosome, small subunit precursor);GO:0030688(preribosome, small subunit precursor)	NA	SLX9 ribosome biogenesis factor [Source:HGNC Symbol;Acc:HGNC:15811]	protein_coding;processed_transcript	32.9324	21.4723	28.2076	15.9527	5.6427	9.49635	6.62861e-05	0.00219756
ENSG00000101265	RASSF2	ENST00000379400	GO:0000775(chromosome, centromeric region);GO:0000776(kinetochore);GO:0001501(skeletal system development);GO:0001503(ossification);GO:0004672(protein kinase activity);GO:0005515(protein binding);GO:0005634(nucleus);GO:0005654(nucleoplasm);GO:0005694(chromosome);GO:0005737(cytoplasm);GO:0005794(Golgi apparatus);GO:0005829(cytosol);GO:0005886(plasma membrane);GO:0007049(cell cycle);GO:0007165(sign…	04392(Hippo signaling pathway - multiple species)	Ras association domain family member 2 [Source:HGNC Symbol;Acc:HGNC:9883]	protein_coding	1.74548	2.56689	2.22286	3.32999	0.884829	0.509728	6.73061e-05	0.00222645
ENSG00000267795	SMIM22	ENST00000588606;ENST00000586005;ENST00000615889;ENST00000586440;ENST00000591004;ENST00000588894;ENST00000588500;ENST00000591870	GO:0005515(protein binding);GO:0005768(endosome);GO:0005770(late endosome);GO:0016020(membrane);GO:0016021(integral component of membrane);GO:0030335(positive regulation of cell migration);GO:0032956(regulation of actin cytoskeleton organization);GO:0042127(regulation of cell population proliferation);GO:0051726(regulation of cell cycle);GO:0140042(lipid droplet formation);GO:0140042(lipid drople…	NA	small integral membrane protein 22 [Source:HGNC Symbol;Acc:HGNC:48329]	protein_coding;retained_intron	0.23134	0.0966288	0.217725	0.137677	0.685847	1.95647	6.94392e-05	0.00229145
ENSG00000159840	ZYX	ENST00000468083;ENST00000322764;ENST00000354434;ENST00000449630;ENST00000457235;ENST00000497119;ENST00000392910;ENST00000446634	GO:0001725(stress fiber);GO:0003723(RNA binding);GO:0005515(protein binding);GO:0005634(nucleus);GO:0005737(cytoplasm);GO:0005829(cytosol);GO:0005856(cytoskeleton);GO:0005886(plasma membrane);GO:0005912(adherens junction);GO:0005925(focal adhesion);GO:0007155(cell adhesion);GO:0007160(cell-matrix adhesion);GO:0007165(signal transduction);GO:0007179(transforming growth factor beta receptor signali…	04510(Focal adhesion);04510(Focal adhesion)	zyxin [Source:HGNC Symbol;Acc:HGNC:13200]	retained_intron;protein_coding	41.8895	38.9667	28.7083	29.5966	15.2211	15.9323	6.9577e-05	0.00229145
ENSG00000182749	PAQR7	ENST00000675840;ENST00000374296	GO:0003707(nuclear steroid receptor activity);GO:0005496(steroid binding);GO:0005515(protein binding);GO:0005886(plasma membrane);GO:0008289(lipid binding);GO:0016020(membrane);GO:0016021(integral component of membrane);GO:0030154(cell differentiation);GO:0038023(signaling receptor activity);GO:0043401(steroid hormone mediated signaling pathway);GO:0048477(oogenesis);GO:0048545(response to steroi…	NA	progestin and adipoQ receptor family member 7 [Source:HGNC Symbol;Acc:HGNC:23146]	protein_coding	3.44755	4.13686	2.0281	3.93901	0.836502	1.00548	7.02547e-05	0.0023087
ENSG00000215218	UBE2QL1	ENST00000399816	GO:0000166(nucleotide binding);GO:0000209(protein polyubiquitination);GO:0005515(protein binding);GO:0005524(ATP binding);GO:0005634(nucleus);GO:0005654(nucleoplasm);GO:0005886(plasma membrane);GO:0016567(protein ubiquitination);GO:0016740(transferase activity);GO:0061631(ubiquitin conjugating enzyme activity)	04120(Ubiquitin mediated proteolysis)	ubiquitin conjugating enzyme E2 Q family like 1 [Source:HGNC Symbol;Acc:HGNC:37269]	protein_coding	2.2189	2.03755	2.46906	2.21606	0.85892	0.427442	7.0987e-05	0.00232766
ENSG00000158258	CLSTN2	ENST00000458420;ENST00000511524	GO:0000139(Golgi membrane);GO:0001540(amyloid-beta binding);GO:0005509(calcium ion binding);GO:0005783(endoplasmic reticulum);GO:0005789(endoplasmic reticulum membrane);GO:0005794(Golgi apparatus);GO:0005886(plasma membrane);GO:0007155(cell adhesion);GO:0007156(homophilic cell adhesion via plasma membrane adhesion molecules);GO:0009986(cell surface);GO:0014069(postsynaptic density);GO:0016020(mem…	NA	calsyntenin 2 [Source:HGNC Symbol;Acc:HGNC:17448]	protein_coding;retained_intron	2.13851	2.50987	4.27659	6.55431	2.53057	1.50535	7.47087e-05	0.00244435
ENSG00000131018	SYNE1	ENST00000367251;ENST00000423061;ENST00000367257;ENST00000367255;ENST00000488376;ENST00000468937;ENST00000672169;ENST00000490866;ENST00000545694;ENST00000367256;ENST00000472563;ENST00000478916;ENST00000367248;ENST00000539504;ENST00000471834;ENST00000489156;ENST00000535896	GO:0000932(P-body);GO:0003723(RNA binding);GO:0003779(actin binding);GO:0005515(protein binding);GO:0005521(lamin binding);GO:0005634(nucleus);GO:0005635(nuclear envelope);GO:0005640(nuclear outer membrane);GO:0005654(nucleoplasm);GO:0005730(nucleolus);GO:0005737(cytoplasm);GO:0005794(Golgi apparatus);GO:0005813(centrosome);GO:0005856(cytoskeleton);GO:0006997(nucleus organization);GO:0007030(Golg…	NA	spectrin repeat containing nuclear envelope protein 1 [Source:HGNC Symbol;Acc:HGNC:17089]	protein_coding;retained_intron	0.155757	0.179621	0.25413	0.746603	0.153291	0.0805027	7.49545e-05	0.00244704
ENSG00000105698	USF2	ENST00000599471;ENST00000594064;ENST00000607959;ENST00000595068;ENST00000222305;ENST00000343550;ENST00000594264;ENST00000600898;ENST00000593708;ENST00000602164;ENST00000597671;ENST00000600341;ENST00000596380;ENST00000599625;ENST00000598058;ENST00000379134	GO:0000430(regulation of transcription from RNA polymerase II promoter by glucose);GO:0000432(positive regulation of transcription from RNA polymerase II promoter by glucose);GO:0000785(chromatin);GO:0000978(RNA polymerase II cis-regulatory region sequence-specific DNA binding);GO:0000981(DNA-binding transcription factor activity, RNA polymerase II-specific);GO:0003677(DNA binding);GO:0003700(DNA…	NA	upstream transcription factor 2, c-fos interacting [Source:HGNC Symbol;Acc:HGNC:12594]	protein_coding;retained_intron;nonsense_mediated_decay;processed_transcript	31.634	22.5433	32.3019	20.1825	8.94201	10.8595	7.53043e-05	0.00245312
ENSG00000205420	KRT6A	ENST00000330722;ENST00000549600;ENST00000548735;ENST00000549898;ENST00000549754	GO:0001899(negative regulation of cytolysis by symbiont of host cells);GO:0002009(morphogenesis of an epithelium);GO:0005200(structural constituent of cytoskeleton);GO:0005515(protein binding);GO:0005634(nucleus);GO:0005829(cytosol);GO:0005882(intermediate filament);GO:0008284(positive regulation of cell population proliferation);GO:0016020(membrane);GO:0030154(cell differentiation);GO:0030280(st…	NA	keratin 6A [Source:HGNC Symbol;Acc:HGNC:6443]	protein_coding;retained_intron	0.217718	0.123384	0.0624665	0.292139	0.410166	2.45504	7.57692e-05	0.00246291
ENSG00000182220	ATP6AP2	ENST00000638153;ENST00000636787;ENST00000636287;ENST00000636409;ENST00000637327;ENST00000636580;ENST00000637140;ENST00000637019;ENST00000635774;ENST00000636223;ENST00000637954;ENST00000487051;ENST00000378438;ENST00000423649;ENST00000636639;ENST00000637955;ENST00000637526;ENST00000635829;ENST00000637482;ENST00000636251;ENST00000638046;ENST00000479120;ENST00000637793;ENST00000635734;ENST00000636970…	GO:0000139(Golgi membrane);GO:0000220(vacuolar proton-transporting V-type ATPase, V0 domain);GO:0000421(autophagosome membrane);GO:0002003(angiotensin maturation);GO:0005515(protein binding);GO:0005615(extracellular space);GO:0005764(lysosome);GO:0005765(lysosomal membrane);GO:0005768(endosome);GO:0005783(endoplasmic reticulum);GO:0005789(endoplasmic reticulum membrane);GO:0005886(plasma membrane…	04614(Renin-angiotensin system);04614(Renin-angiotensin system)	ATPase H+ transporting accessory protein 2 [Source:HGNC Symbol;Acc:HGNC:18305]	protein_coding;nonsense_mediated_decay;retained_intron	8.11039	6.6998	9.31493	6.12643	15.1245	18.7673	7.60618e-05	0.00246707
ENSG00000150667	FSIP1	ENST00000350221;ENST00000642527;ENST00000559547;ENST00000560769	NA	NA	fibrous sheath interacting protein 1 [Source:HGNC Symbol;Acc:HGNC:21674]	protein_coding;nonsense_mediated_decay	0.410751	0.155825	0.448707	0.188641	1.28586	1.52659	7.97343e-05	0.0025806
ENSG00000180354	MTURN	ENST00000324453;ENST00000324489;ENST00000409688	GO:0005515(protein binding);GO:0005737(cytoplasm);GO:0023051(regulation of signaling);GO:0032088(negative regulation of NF-kappaB transcription factor activity);GO:0045654(positive regulation of megakaryocyte differentiation);GO:0046330(positive regulation of JNK cascade);GO:0070374(positive regulation of ERK1 and ERK2 cascade);GO:0070374(positive regulation of ERK1 and ERK2 cascade)	NA	maturin, neural progenitor differentiation regulator homolog [Source:HGNC Symbol;Acc:HGNC:25457]	protein_coding	2.17406	2.23799	1.97342	1.17113	4.12376	4.97364	8.25252e-05	0.00266517
ENSG00000244468	ENSG00000244468	ENST00000489011	NA	NA	novel transcript	lncRNA	9.07588	3.86386	2.07236	2.42833	1.08426	0.725977	8.27451e-05	0.00266653
ENSG00000104866	PPP1R37	ENST00000221462;ENST00000422370;ENST00000540059;ENST00000593240;ENST00000544069;ENST00000545910;ENST00000542809	GO:0004864(protein phosphatase inhibitor activity);GO:0005515(protein binding);GO:0043086(negative regulation of catalytic activity);GO:0043086(negative regulation of catalytic activity)	NA	protein phosphatase 1 regulatory subunit 37 [Source:HGNC Symbol;Acc:HGNC:27607]	protein_coding;retained_intron;processed_transcript	11.019	9.75758	9.53762	8.43311	4.27581	3.9312	8.3926e-05	0.00269878
ENSG00000196611	MMP1	ENST00000315274;ENST00000681643	GO:0004175(endopeptidase activity);GO:0004222(metalloendopeptidase activity);GO:0004252(serine-type endopeptidase activity);GO:0005576(extracellular region);GO:0006508(proteolysis);GO:0008233(peptidase activity);GO:0008237(metallopeptidase activity);GO:0008270(zinc ion binding);GO:0016787(hydrolase activity);GO:0022617(extracellular matrix disassembly);GO:0030198(extracellular matrix organization…	03320(PPAR signaling pathway);04657(IL-17 signaling pathway);04926(Relaxin signaling pathway);05171(Coronavirus disease - COVID-19);05200(Pathways in cancer);05219(Bladder cancer);05323(Rheumatoid arthritis);05323(Rheumatoid arthritis)	matrix metallopeptidase 1 [Source:HGNC Symbol;Acc:HGNC:7155]	protein_coding;retained_intron	0.0411362	0.0375642	0.0222519	0.0570349	0.416741	0.471681	8.48541e-05	0.00272278
ENSG00000188580	NKAIN2	ENST00000368417;ENST00000640160	GO:0002028(regulation of sodium ion transport);GO:0005886(plasma membrane);GO:0016020(membrane);GO:0016021(integral component of membrane);GO:0016021(integral component of membrane)	NA	sodium/potassium transporting ATPase interacting 2 [Source:HGNC Symbol;Acc:HGNC:16443]	protein_coding;nonsense_mediated_decay	0.189571	0.316668	0.425048	0.767921	0.0685507	0.0629089	8.93096e-05	0.00285353
ENSG00000104825	NFKBIB	ENST00000313582;ENST00000572515;ENST00000509705	GO:0003713(transcription coactivator activity);GO:0005515(protein binding);GO:0005634(nucleus);GO:0005737(cytoplasm);GO:0005829(cytosol);GO:0006351(DNA-templated transcription);GO:0006954(inflammatory response);GO:0007165(signal transduction);GO:0007253(cytoplasmic sequestering of NF-kappaB);GO:0043122(regulation of I-kappaB kinase/NF-kappaB signaling);GO:0045893(positive regulation of DNA-templa…	04062(Chemokine signaling pathway);04621(NOD-like receptor signaling pathway);04622(RIG-I-like receptor signaling pathway);04623(Cytosolic DNA-sensing pathway);04658(Th1 and Th2 cell differentiation);04659(Th17 cell differentiation);04660(T cell receptor signaling pathway);04662(B cell receptor signaling pathway);04722(Neurotrophin signaling pathway);04920(Adipocytokine signaling pathway);05130(P…	NFKB inhibitor beta [Source:HGNC Symbol;Acc:HGNC:7798]	protein_coding;nonsense_mediated_decay	11.815	9.47472	10.0723	7.88001	3.02696	3.95108	9.20843e-05	0.00293592
ENSG00000205413	SAMD9	ENST00000379958;ENST00000620985	GO:0005515(protein binding);GO:0005737(cytoplasm);GO:0005829(cytosol);GO:0034058(endosomal vesicle fusion);GO:0043231(intracellular membrane-bounded organelle);GO:0043231(intracellular membrane-bounded organelle)	NA	sterile alpha motif domain containing 9 [Source:HGNC Symbol;Acc:HGNC:1348]	protein_coding	0.684508	0.908263	0.782871	1.4259	0.267611	0.213785	9.26021e-05	0.00294616
ENSG00000169583	CLIC3	ENST00000480181;ENST00000494426;ENST00000473911	GO:0005244(voltage-gated ion channel activity);GO:0005254(chloride channel activity);GO:0005515(protein binding);GO:0005634(nucleus);GO:0005737(cytoplasm);GO:0006749(glutathione metabolic process);GO:0006811(ion transport);GO:0006821(chloride transport);GO:0007165(signal transduction);GO:0016020(membrane);GO:0016021(integral component of membrane);GO:0016604(nuclear body);GO:0034220(ion transmemb…	NA	chloride intracellular channel 3 [Source:HGNC Symbol;Acc:HGNC:2064]	processed_transcript;protein_coding	100.48	53.8222	48.0279	25.0514	17.4117	26.9392	9.37784e-05	0.00297727
ENSG00000130479	MAP1S	ENST00000324096;ENST00000598769;ENST00000598756;ENST00000596637;ENST00000601097;ENST00000544059;ENST00000601544;ENST00000599494	GO:0000226(microtubule cytoskeleton organization);GO:0001578(microtubule bundle formation);GO:0003677(DNA binding);GO:0003779(actin binding);GO:0005515(protein binding);GO:0005634(nucleus);GO:0005654(nucleoplasm);GO:0005730(nucleolus);GO:0005737(cytoplasm);GO:0005813(centrosome);GO:0005815(microtubule organizing center);GO:0005819(spindle);GO:0005829(cytosol);GO:0005856(cytoskeleton);GO:0005874(m…	NA	microtubule associated protein 1S [Source:HGNC Symbol;Acc:HGNC:15715]	protein_coding;retained_intron;processed_transcript;nonsense_mediated_decay	5.87645	5.57577	4.86106	5.13981	2.38465	1.17045	9.58121e-05	0.0030354
ENSG00000148053	NTRK2	ENST00000693539;ENST00000692389;ENST00000688850;ENST00000686496	GO:0000166(nucleotide binding);GO:0001570(vasculogenesis);GO:0001764(neuron migration);GO:0001934(positive regulation of protein phosphorylation);GO:0002020(protease binding);GO:0004672(protein kinase activity);GO:0004712(protein serine/threonine/tyrosine kinase activity);GO:0004713(protein tyrosine kinase activity);GO:0004714(transmembrane receptor protein tyrosine kinase activity);GO:0005030(ne…	04010(MAPK signaling pathway);04014(Ras signaling pathway);04020(Calcium signaling pathway);04151(PI3K-Akt signaling pathway);04722(Neurotrophin signaling pathway);05034(Alcoholism);05034(Alcoholism)	neurotrophic receptor tyrosine kinase 2 [Source:HGNC Symbol;Acc:HGNC:8032]	protein_coding;retained_intron	0	0.00468379	0.0037175	0.00637851	0.0698256	0.0281551	0.000100787	0.00316622
ENSG00000248643	RBM14-RBM4	ENST00000412278;ENST00000421355;ENST00000511114;ENST00000500635	GO:0003676(nucleic acid binding);GO:0003723(RNA binding);GO:0008270(zinc ion binding);GO:0008270(zinc ion binding)	NA	RBM14-RBM4 readthrough [Source:HGNC Symbol;Acc:HGNC:38840]	protein_coding;nonsense_mediated_decay;processed_transcript	4.35618	8.21618	6.70265	10.5584	2.74741	1.3944	0.000100308	0.00316622
ENSG00000255571	MIR9-3HG	ENST00000558754;ENST00000668524;ENST00000671075;ENST00000558692;ENST00000559235;ENST00000538734;ENST00000659850;ENST00000669098;ENST00000536780;ENST00000669037;ENST00000671447;ENST00000658764;ENST00000662152;ENST00000663717;ENST00000654184;ENST00000659235;ENST00000654171;ENST00000661036;ENST00000664925;ENST00000658770	NA	NA	MIR9-3 host gene [Source:HGNC Symbol;Acc:HGNC:27388]	lncRNA	0.721244	0.671468	1.02765	0.998912	0.310456	0.235962	0.000100733	0.00316622
ENSG00000127578	WFIKKN1	ENST00000573440;ENST00000319070	GO:0001501(skeletal system development);GO:0004857(enzyme inhibitor activity);GO:0004867(serine-type endopeptidase inhibitor activity);GO:0005515(protein binding);GO:0005576(extracellular region);GO:0008191(metalloendopeptidase inhibitor activity);GO:0010466(negative regulation of peptidase activity);GO:0010951(negative regulation of endopeptidase activity);GO:0030414(peptidase inhibitor activity…	NA	WAP, follistatin/kazal, immunoglobulin, kunitz and netrin domain containing 1 [Source:HGNC Symbol;Acc:HGNC:30912]	retained_intron;protein_coding	0.219769	0.334676	0.461019	0.376491	0.0530881	0.0336401	0.000102245	0.00320532
ENSG00000109099	PMP22	ENST00000675808;ENST00000674673;ENST00000312280;ENST00000675551;ENST00000643451;ENST00000676194;ENST00000471150;ENST00000674947;ENST00000676161;ENST00000580497;ENST00000426385;ENST00000395938	GO:0005515(protein binding);GO:0005886(plasma membrane);GO:0005923(bicellular tight junction);GO:0007268(chemical synaptic transmission);GO:0007422(peripheral nervous system development);GO:0008219(cell death);GO:0008285(negative regulation of cell population proliferation);GO:0010977(negative regulation of neuron projection development);GO:0016020(membrane);GO:0016021(integral component of membr…	NA	peripheral myelin protein 22 [Source:HGNC Symbol;Acc:HGNC:9118]	protein_coding;nonsense_mediated_decay;processed_transcript;retained_intron	1.28212	1.03314	1.68799	1.83712	3.08776	3.05745	0.000105509	0.00329384
ENSG00000100292	HMOX1	ENST00000216117;ENST00000494998	GO:0001525(angiogenesis);GO:0001666(response to hypoxia);GO:0001935(endothelial cell proliferation);GO:0002246(wound healing involved in inflammatory response);GO:0002686(negative regulation of leukocyte migration);GO:0004392(heme oxygenase (decyclizing) activity);GO:0004630(phospholipase D activity);GO:0005198(structural molecule activity);GO:0005515(protein binding);GO:0005615(extracellular spa…	00860(Porphyrin and chlorophyll metabolism);01100(Metabolic pathways);04066(HIF-1 signaling pathway);04216(Ferroptosis);04978(Mineral absorption);05200(Pathways in cancer);05206(MicroRNAs in cancer);05225(Hepatocellular carcinoma);05418(Fluid shear stress and atherosclerosis);05418(Fluid shear stress and atherosclerosis)	heme oxygenase 1 [Source:HGNC Symbol;Acc:HGNC:5013]	protein_coding;retained_intron	3.10661	3.11261	7.56204	6.13496	2.00377	2.3888	0.000106875	0.00332957
ENSG00000147614	ATP6V0D2	ENST00000521564;ENST00000523635;ENST00000285393	GO:0005515(protein binding);GO:0005765(lysosomal membrane);GO:0005768(endosome);GO:0005769(early endosome);GO:0006811(ion transport);GO:0007034(vacuolar transport);GO:0007035(vacuolar acidification);GO:0010008(endosome membrane);GO:0016020(membrane);GO:0016241(regulation of macroautophagy);GO:0016324(apical plasma membrane);GO:0016471(vacuolar proton-transporting V-type ATPase complex);GO:0030670…	00190(Oxidative phosphorylation);01100(Metabolic pathways);04142(Lysosome);04145(Phagosome);04721(Synaptic vesicle cycle);04966(Collecting duct acid secretion);05110(Vibrio cholerae infection);05120(Epithelial cell signaling in Helicobacter pylori infection);05152(Tuberculosis);05165(Human papillomavirus infection);05203(Viral carcinogenesis);05323(Rheumatoid arthritis);05323(Rheumatoid arthritis)	ATPase H+ transporting V0 subunit d2 [Source:HGNC Symbol;Acc:HGNC:18266]	protein_coding	0.0937819	0.149566	0	0.0179869	0.355102	0.332436	0.000107505	0.00333531
ENSG00000130313	PGLS	ENST00000252603;ENST00000598811;ENST00000594761;ENST00000596799;ENST00000600923;ENST00000595782	GO:0005515(protein binding);GO:0005737(cytoplasm);GO:0005829(cytosol);GO:0005975(carbohydrate metabolic process);GO:0006098(pentose-phosphate shunt);GO:0009051(pentose-phosphate shunt, oxidative branch);GO:0016787(hydrolase activity);GO:0017057(6-phosphogluconolactonase activity);GO:0070062(extracellular exosome);GO:0070062(extracellular exosome)	00030(Pentose phosphate pathway);01100(Metabolic pathways);01200(Carbon metabolism);01200(Carbon metabolism)	6-phosphogluconolactonase [Source:HGNC Symbol;Acc:HGNC:8903]	protein_coding;retained_intron;nonsense_mediated_decay	15.7633	10.966	11.7758	9.18641	3.33822	5.25324	0.000107319	0.00333531
ENSG00000119138	KLF9	ENST00000377126	GO:0000785(chromatin);GO:0000978(RNA polymerase II cis-regulatory region sequence-specific DNA binding);GO:0000981(DNA-binding transcription factor activity, RNA polymerase II-specific);GO:0003677(DNA binding);GO:0003700(DNA-binding transcription factor activity);GO:0005634(nucleus);GO:0005654(nucleoplasm);GO:0005829(cytosol);GO:0005886(plasma membrane);GO:0006357(regulation of transcription by R…	NA	Kruppel like factor 9 [Source:HGNC Symbol;Acc:HGNC:1123]	protein_coding	3.53537	3.29833	3.71349	3.44342	7.46464	7.91038	0.000108553	0.00336088
ENSG00000235205	TATDN2P3	ENST00000452855	NA	NA	TatD DNase domain containing 2 pseudogene 3 [Source:HGNC Symbol;Acc:HGNC:39256]	processed_pseudogene	0.046097	0.247874	0.174047	0.804864	2.38075	0.945532	0.000110681	0.00341292
ENSG00000079156	OSBPL6	ENST00000392505;ENST00000359685;ENST00000409631;ENST00000409045;ENST00000190611;ENST00000357080	GO:0005515(protein binding);GO:0005634(nucleus);GO:0005635(nuclear envelope);GO:0005737(cytoplasm);GO:0005768(endosome);GO:0005783(endoplasmic reticulum);GO:0005789(endoplasmic reticulum membrane);GO:0005829(cytosol);GO:0005886(plasma membrane);GO:0006699(bile acid biosynthetic process);GO:0006869(lipid transport);GO:0008289(lipid binding);GO:0010008(endosome membrane);GO:0015248(sterol transport…	NA	oxysterol binding protein like 6 [Source:HGNC Symbol;Acc:HGNC:16388]	protein_coding	1.59111	1.08888	2.5159	1.93231	0.50967	0.800774	0.000110693	0.00341292
ENSG00000145832	SLC25A48	ENST00000698886;ENST00000274513;ENST00000646290;ENST00000412661;ENST00000433282;ENST00000650267;ENST00000425402	GO:0005515(protein binding);GO:0005739(mitochondrion);GO:0005743(mitochondrial inner membrane);GO:0016020(membrane);GO:0016021(integral component of membrane);GO:0022857(transmembrane transporter activity);GO:0055085(transmembrane transport);GO:0055085(transmembrane transport)	NA	solute carrier family 25 member 48 [Source:HGNC Symbol;Acc:HGNC:30451]	processed_transcript;protein_coding	0.173871	0.108699	0.117139	0.0554919	0.0132613	0.00985838	0.000110917	0.00341292
ENSG00000113532	ST8SIA4	ENST00000231461;ENST00000451528;ENST00000523381	GO:0000139(Golgi membrane);GO:0001574(ganglioside biosynthetic process);GO:0003828(alpha-N-acetylneuraminate alpha-2,8-sialyltransferase activity);GO:0005794(Golgi apparatus);GO:0006486(protein glycosylation);GO:0006491(N-glycan processing);GO:0007399(nervous system development);GO:0008373(sialyltransferase activity);GO:0009311(oligosaccharide metabolic process);GO:0016020(membrane);GO:0016021(in…	NA	ST8 alpha-N-acetyl-neuraminide alpha-2,8-sialyltransferase 4 [Source:HGNC Symbol;Acc:HGNC:10871]	protein_coding;nonsense_mediated_decay	2.56871	3.32558	2.16749	2.76352	6.7237	5.25179	0.000111657	0.00342864
ENSG00000130066	SAT1	ENST00000379270;ENST00000474223;ENST00000379253;ENST00000489394;ENST00000462639;ENST00000487713;ENST00000379254;ENST00000379251	GO:0001525(angiogenesis);GO:0004145(diamine N-acetyltransferase activity);GO:0005515(protein binding);GO:0005737(cytoplasm);GO:0005829(cytosol);GO:0006596(polyamine biosynthetic process);GO:0008080(N-acetyltransferase activity);GO:0009447(putrescine catabolic process);GO:0016407(acetyltransferase activity);GO:0016740(transferase activity);GO:0016746(acyltransferase activity);GO:0019809(spermidine…	00330(Arginine and proline metabolism);01100(Metabolic pathways);04216(Ferroptosis);04216(Ferroptosis)	spermidine/spermine N1-acetyltransferase 1 [Source:HGNC Symbol;Acc:HGNC:10540]	protein_coding;retained_intron;nonsense_mediated_decay	10.458	6.5809	15.0141	7.07521	18.557	35.9106	0.000112637	0.00345166
ENSG00000133101	CCNA1	ENST00000255465;ENST00000625767;ENST00000440264;ENST00000630422	GO:0000079(regulation of cyclin-dependent protein serine/threonine kinase activity);GO:0000307(cyclin-dependent protein kinase holoenzyme complex);GO:0005515(protein binding);GO:0005634(nucleus);GO:0005654(nucleoplasm);GO:0005737(cytoplasm);GO:0005829(cytosol);GO:0007049(cell cycle);GO:0007141(male meiosis I);GO:0007283(spermatogenesis);GO:0015630(microtubule cytoskeleton);GO:0016538(cyclin-depen…	04110(Cell cycle);04152(AMPK signaling pathway);04218(Cellular senescence);04914(Progesterone-mediated oocyte maturation);05161(Hepatitis B);05165(Human papillomavirus infection);05166(Human T-cell leukemia virus 1 infection);05169(Epstein-Barr virus infection);05200(Pathways in cancer);05202(Transcriptional misregulation in cancer);05203(Viral carcinogenesis);05221(Acute myeloid leukemia);05221(…	cyclin A1 [Source:HGNC Symbol;Acc:HGNC:1577]	protein_coding	1.94266	1.4037	1.1316	0.571072	0.27732	0.239196	0.000113388	0.00346296
ENSG00000160183	TMPRSS3	ENST00000398397;ENST00000433957;ENST00000474596;ENST00000644384;ENST00000652415;ENST00000476848;ENST00000398405;ENST00000482761;ENST00000478680	GO:0004252(serine-type endopeptidase activity);GO:0005044(scavenger receptor activity);GO:0005515(protein binding);GO:0005783(endoplasmic reticulum);GO:0005789(endoplasmic reticulum membrane);GO:0006508(proteolysis);GO:0006883(cellular sodium ion homeostasis);GO:0006897(endocytosis);GO:0007605(sensory perception of sound);GO:0008233(peptidase activity);GO:0008236(serine-type peptidase activity);G…	NA	transmembrane serine protease 3 [Source:HGNC Symbol;Acc:HGNC:11877]	protein_coding;processed_transcript;retained_intron	4.00311	3.31891	4.93148	4.4215	1.69381	1.42911	0.000113699	0.00346296
ENSG00000203697	CAPN8	ENST00000366872;ENST00000366873;ENST00000465098;ENST00000525760;ENST00000442247;ENST00000482183;ENST00000482401	GO:0004198(calcium-dependent cysteine-type endopeptidase activity);GO:0005509(calcium ion binding);GO:0005737(cytoplasm);GO:0005794(Golgi apparatus);GO:0006508(proteolysis);GO:0007586(digestion);GO:0008233(peptidase activity);GO:0008234(cysteine-type peptidase activity);GO:0016787(hydrolase activity);GO:0046872(metal ion binding);GO:0046872(metal ion binding)	NA	calpain 8 [Source:HGNC Symbol;Acc:HGNC:1485]	protein_coding;retained_intron	0.548596	0.469158	0.444817	0.864637	0.109953	0.106867	0.000115084	0.00349097
ENSG00000260772	ENSG00000260772	ENST00000561622	NA	NA	novel transcript	lncRNA	4.46792	1.3759	3.72988	0.426254	0.051459	0.244221	0.000117094	0.0035376
ENSG00000156127	BATF	ENST00000555795;ENST00000286639	GO:0000785(chromatin);GO:0000978(RNA polymerase II cis-regulatory region sequence-specific DNA binding);GO:0000981(DNA-binding transcription factor activity, RNA polymerase II-specific);GO:0001228(DNA-binding transcription activator activity, RNA polymerase II-specific);GO:0001819(positive regulation of cytokine production);GO:0002320(lymphoid progenitor cell differentiation);GO:0003677(DNA bindi…	05235(PD-L1 expression and PD-1 checkpoint pathway in cancer);05235(PD-L1 expression and PD-1 checkpoint pathway in cancer)	basic leucine zipper ATF-like transcription factor [Source:HGNC Symbol;Acc:HGNC:958]	processed_transcript;protein_coding	24.2979	14.662	14.358	9.11998	4.39027	5.86496	0.000122406	0.00369065
ENSG00000050030	NEXMIF	ENST00000642681	GO:0001953(negative regulation of cell-matrix adhesion);GO:0005634(nucleus);GO:0005654(nucleoplasm);GO:0005737(cytoplasm);GO:0005829(cytosol);GO:0007399(nervous system development);GO:0030496(midbody);GO:0033629(negative regulation of cell adhesion mediated by integrin);GO:0072686(mitotic spindle);GO:2000048(negative regulation of cell-cell adhesion mediated by cadherin);GO:2001223(negative regul…	NA	neurite extension and migration factor [Source:HGNC Symbol;Acc:HGNC:29433]	protein_coding	0.009129	0.006604	0.01092	0.039279	0.128358	0.117886	0.00012378	0.0037246
ENSG00000226421	SLC25A5P5	ENST00000435239	NA	NA	solute carrier family 25 member 5 pseudogene 5 [Source:HGNC Symbol;Acc:HGNC:511]	processed_pseudogene	0.187081	0.116017	1.20322	1.10291	0.07923	0.02988	0.000124976	0.00375303
ENSG00000287861	ENSG00000287861	ENST00000657315	NA	NA	novel transcript	lncRNA	10.9712	7.00923	18.5892	11.505	3.90964	3.51977	0.000127207	0.0038124
ENSG00000181444	ZNF467	ENST00000302017;ENST00000484747	GO:0000978(RNA polymerase II cis-regulatory region sequence-specific DNA binding);GO:0000981(DNA-binding transcription factor activity, RNA polymerase II-specific);GO:0003677(DNA binding);GO:0005515(protein binding);GO:0005634(nucleus);GO:0006355(regulation of DNA-templated transcription);GO:0006357(regulation of transcription by RNA polymerase II);GO:0046872(metal ion binding);GO:0046872(metal i…	NA	zinc finger protein 467 [Source:HGNC Symbol;Acc:HGNC:23154]	protein_coding	13.4276	11.2857	11.8226	8.93692	4.32858	4.58002	0.000127483	0.00381305
ENSG00000008710	PKD1	ENST00000423118;ENST00000262304;ENST00000565639;ENST00000562297;ENST00000485120;ENST00000472577;ENST00000566784;ENST00000469241;ENST00000483731;ENST00000480227;ENST00000483814;ENST00000562425;ENST00000496574;ENST00000564890;ENST00000474088;ENST00000568796;ENST00000564865;ENST00000471603;ENST00000469851;ENST00000567355;ENST00000486339;ENST00000472659;ENST00000566905;ENST00000569983;ENST00000475889…	GO:0000139(Golgi membrane);GO:0001502(cartilage condensation);GO:0001568(blood vessel development);GO:0001701(in utero embryonic development);GO:0001822(kidney development);GO:0001889(liver development);GO:0001892(embryonic placenta development);GO:0002133(polycystin complex);GO:0005261(cation channel activity);GO:0005262(calcium channel activity);GO:0005515(protein binding);GO:0005634(nucleus);G…	NA	polycystin 1, transient receptor potential channel interacting [Source:HGNC Symbol;Acc:HGNC:9008]	protein_coding;retained_intron;processed_transcript;nonsense_mediated_decay	1.65665	2.55633	3.20704	5.73725	1.73457	1.39092	0.000127899	0.00381767
ENSG00000166106	ADAMTS15	ENST00000299164	GO:0004175(endopeptidase activity);GO:0004222(metalloendopeptidase activity);GO:0005576(extracellular region);GO:0005615(extracellular space);GO:0006508(proteolysis);GO:0007520(myoblast fusion);GO:0008201(heparin binding);GO:0008233(peptidase activity);GO:0008237(metallopeptidase activity);GO:0008270(zinc ion binding);GO:0009986(cell surface);GO:0016787(hydrolase activity);GO:0022617(extracellula…	NA	ADAM metallopeptidase with thrombospondin type 1 motif 15 [Source:HGNC Symbol;Acc:HGNC:16305]	protein_coding	0.155499	0.150507	0.314775	0.400794	0.033906	0	0.000128344	0.00381767
ENSG00000288698	ENSG00000288698	ENST00000680408	GO:0005743(mitochondrial inner membrane);GO:0016020(membrane);GO:0016021(integral component of membrane)	NA	novel protein	nonsense_mediated_decay	4.25003	0.0737099	0.0428833	0.697086	0.0361927	0	0.000128402	0.00381767
ENSG00000275964	ENSG00000275964	ENST00000620617	NA	NA	novel transcript	lncRNA	7.09309	5.08196	6.88818	4.01067	1.45412	2.00247	0.000128961	0.0038267
ENSG00000074842	MYDGF	ENST00000599630;ENST00000262947;ENST00000596031	GO:0001525(angiogenesis);GO:0001934(positive regulation of protein phosphorylation);GO:0001938(positive regulation of endothelial cell proliferation);GO:0005515(protein binding);GO:0005576(extracellular region);GO:0005615(extracellular space);GO:0005783(endoplasmic reticulum);GO:0005788(endoplasmic reticulum lumen);GO:0005793(endoplasmic reticulum-Golgi intermediate compartment);GO:0005794(Golgi …	NA	myeloid derived growth factor [Source:HGNC Symbol;Acc:HGNC:16948]	protein_coding;retained_intron	28.1325	19.832	21.0637	16.2372	7.52665	9.25809	0.000129981	0.00384933
ENSG00000245060	LINC00847	ENST00000661444;ENST00000509921;ENST00000501937;ENST00000657229;ENST00000653411;ENST00000659553;ENST00000653584;ENST00000651233;ENST00000502162;ENST00000652659;ENST00000661810;ENST00000665473;ENST00000659497	NA	NA	long intergenic non-protein coding RNA 847 [Source:HGNC Symbol;Acc:HGNC:45050]	lncRNA	1.38982	0.957148	2.94956	2.08715	3.28956	3.93513	0.000130705	0.00385553
ENSG00000171345	KRT19	ENST00000361566;ENST00000468880;ENST00000593096;ENST00000462611;ENST00000455635;ENST00000479031;ENST00000471565	GO:0005198(structural molecule activity);GO:0005200(structural constituent of cytoskeleton);GO:0005515(protein binding);GO:0005829(cytosol);GO:0005856(cytoskeleton);GO:0005882(intermediate filament);GO:0005886(plasma membrane);GO:0007219(Notch signaling pathway);GO:0008307(structural constituent of muscle);GO:0016327(apicolateral plasma membrane);GO:0030018(Z disc);GO:0030855(epithelial cell diff…	04915(Estrogen signaling pathway);05150(Staphylococcus aureus infection);05150(Staphylococcus aureus infection)	keratin 19 [Source:HGNC Symbol;Acc:HGNC:6436]	protein_coding;retained_intron	1164.11	965.238	640.297	569.236	468.041	536.616	0.000130461	0.00385553
ENSG00000254634	SMG1P6	ENST00000532337	NA	NA	SMG1 pseudogene 6 [Source:HGNC Symbol;Acc:HGNC:49863]	unprocessed_pseudogene	0.231448	0.586427	0.198683	0.314499	1.17505	1.56954	0.000147001	0.00431585
ENSG00000106524	ANKMY2	ENST00000306999;ENST00000453623;ENST00000447802;ENST00000627859	GO:0005515(protein binding);GO:0005929(cilium);GO:0019899(enzyme binding);GO:0042995(cell projection);GO:0046872(metal ion binding);GO:0046872(metal ion binding)	NA	ankyrin repeat and MYND domain containing 2 [Source:HGNC Symbol;Acc:HGNC:25370]	protein_coding;nonsense_mediated_decay	4.77368	3.42647	3.39818	2.69518	7.3993	9.37419	0.000147174	0.00431585
ENSG00000166923	GREM1	ENST00000651154	GO:0000902(cell morphogenesis);GO:0001525(angiogenesis);GO:0002042(cell migration involved in sprouting angiogenesis);GO:0002092(positive regulation of receptor internalization);GO:0002689(negative regulation of leukocyte chemotaxis);GO:0003337(mesenchymal to epithelial transition involved in metanephros morphogenesis);GO:0005125(cytokine activity);GO:0005515(protein binding);GO:0005576(extracell…	04350(TGF-beta signaling pathway)	gremlin 1, DAN family BMP antagonist [Source:HGNC Symbol;Acc:HGNC:2001]	protein_coding	0.226315	0.153945	0.100275	0.0864464	0.0341473	0.0147889	0.00015075	0.00440348
ENSG00000100580	TMED8	ENST00000216468	GO:0005515(protein binding)	NA	transmembrane p24 trafficking protein family member 8 [Source:HGNC Symbol;Acc:HGNC:18633]	protein_coding	4.9968	8.25952	7.51316	10.0768	22.0876	13.4154	0.00015295	0.00445907
ENSG00000174015	CBY2	ENST00000378966	GO:0005515(protein binding);GO:0031410(cytoplasmic vesicle);GO:0042802(identical protein binding)	NA	chibby family member 2 [Source:HGNC Symbol;Acc:HGNC:30720]	protein_coding	0.449491	0.258468	0.605618	0.558277	0.0392383	0	0.000153702	0.00446361
ENSG00000111012	CYP27B1	ENST00000547344;ENST00000547451;ENST00000546567;ENST00000546609;ENST00000228606;ENST00000552186	GO:0004497(monooxygenase activity);GO:0004498(calcidiol 1-monooxygenase activity);GO:0005506(iron ion binding);GO:0005737(cytoplasm);GO:0005739(mitochondrion);GO:0005741(mitochondrial outer membrane);GO:0006629(lipid metabolic process);GO:0006766(vitamin metabolic process);GO:0006816(calcium ion transport);GO:0008285(negative regulation of cell population proliferation);GO:0010956(negative regula…	00100(Steroid biosynthesis);01100(Metabolic pathways);04928(Parathyroid hormone synthesis, secretion and action);05152(Tuberculosis);05152(Tuberculosis)	cytochrome P450 family 27 subfamily B member 1 [Source:HGNC Symbol;Acc:HGNC:2606]	retained_intron;protein_coding	0.41835	0.7352	2.44878	1.56085	0.579262	0.567668	0.000154736	0.00448496
ENSG00000221955	SLC12A8	ENST00000469902;ENST00000479231;ENST00000485954	GO:0005515(protein binding);GO:0006811(ion transport);GO:0006813(potassium ion transport);GO:0006884(cell volume homeostasis);GO:0015293(symporter activity);GO:0015377(cation:chloride symporter activity);GO:0015379(potassium:chloride symporter activity);GO:0016020(membrane);GO:0016021(integral component of membrane);GO:0055064(chloride ion homeostasis);GO:0055075(potassium ion homeostasis);GO:005…	NA	solute carrier family 12 member 8 [Source:HGNC Symbol;Acc:HGNC:15595]	protein_coding;retained_intron	0.0386682	0.00926838	0.0704187	0.0977491	0.447895	0.210821	0.000156071	0.0045149
ENSG00000063169	BICRA	ENST00000614245;ENST00000602258;ENST00000594866;ENST00000396720	GO:0000785(chromatin);GO:0005515(protein binding);GO:0005634(nucleus);GO:0006338(chromatin remodeling);GO:0006357(regulation of transcription by RNA polymerase II);GO:0008284(positive regulation of cell population proliferation);GO:0016514(SWI/SNF complex);GO:0045596(negative regulation of cell differentiation);GO:0045893(positive regulation of DNA-templated transcription);GO:0140288(GBAF complex…	NA	BRD4 interacting chromatin remodeling complex associated protein [Source:HGNC Symbol;Acc:HGNC:4332]	protein_coding;retained_intron	2.34234	3.35485	2.43233	2.94118	1.0068	0.988731	0.000158097	0.00456471
ENSG00000173621	LRFN4	ENST00000309602;ENST00000531590	GO:0005515(protein binding);GO:0005886(plasma membrane);GO:0009986(cell surface);GO:0016020(membrane);GO:0016021(integral component of membrane);GO:0098978(glutamatergic synapse);GO:0098982(GABA-ergic synapse);GO:0099061(integral component of postsynaptic density membrane);GO:0099151(regulation of postsynaptic density assembly);GO:0099560(synaptic membrane adhesion);GO:1905606(regulation of presy…	NA	leucine rich repeat and fibronectin type III domain containing 4 [Source:HGNC Symbol;Acc:HGNC:28456]	protein_coding;processed_transcript	5.60484	5.59013	4.19971	3.49184	1.6209	1.8696	0.000161344	0.0046495
ENSG00000267280	TBX2-AS1	ENST00000591313;ENST00000590421;ENST00000589814;ENST00000586706;ENST00000592377	NA	NA	TBX2 antisense RNA 1 [Source:HGNC Symbol;Acc:HGNC:50355]	lncRNA	9.96287	7.23635	8.92427	5.4539	2.40874	2.27779	0.000164771	0.00473915
ENSG00000130731	METTL26	ENST00000614890;ENST00000397665;ENST00000397666;ENST00000397664;ENST00000448973;ENST00000301686;ENST00000456420;ENST00000568077;ENST00000565799;ENST00000568830;ENST00000565163;ENST00000568773;ENST00000338401;ENST00000564039	NA	NA	methyltransferase like 26 [Source:HGNC Symbol;Acc:HGNC:14141]	protein_coding;retained_intron;nonsense_mediated_decay	25.3655	17.0634	25.444	16.1167	4.82762	9.0133	0.000168804	0.00484585
ENSG00000125089	SH3TC1	ENST00000457650;ENST00000509553;ENST00000507801;ENST00000508183;ENST00000506360;ENST00000502350;ENST00000504223;ENST00000507891;ENST00000502559	GO:0005515(protein binding);GO:0005575(cellular_component);GO:0008150(biological_process);GO:0008150(biological_process)	NA	SH3 domain and tetratricopeptide repeats 1 [Source:HGNC Symbol;Acc:HGNC:26009]	protein_coding;retained_intron;processed_transcript;nonsense_mediated_decay	0.132904	0.125766	0.21037	0.203417	0.0320536	0.0190487	0.000172546	0.00492496
ENSG00000106829	TLE4	ENST00000376552;ENST00000490347;ENST00000474519;ENST00000495170;ENST00000428713;ENST00000376525;ENST00000265284;ENST00000376544;ENST00000466428;ENST00000435650	GO:0000122(negative regulation of transcription by RNA polymerase II);GO:0003682(chromatin binding);GO:0003714(transcription corepressor activity);GO:0005515(protein binding);GO:0005634(nucleus);GO:0005654(nucleoplasm);GO:0005667(transcription regulator complex);GO:0006355(regulation of DNA-templated transcription);GO:0008150(biological_process);GO:0016055(Wnt signaling pathway);GO:0045892(negati…	NA	TLE family member 4, transcriptional corepressor [Source:HGNC Symbol;Acc:HGNC:11840]	protein_coding;processed_transcript;retained_intron	0.162617	0.3087	0.064079	0.143381	0.731227	0.454244	0.000172955	0.00492724
ENSG00000178597	PSAPL1	ENST00000319098	GO:0005576(extracellular region);GO:0005615(extracellular space);GO:0005737(cytoplasm);GO:0005764(lysosome);GO:0005829(cytosol);GO:0006629(lipid metabolic process);GO:0006665(sphingolipid metabolic process);GO:0007193(adenylate cyclase-inhibiting G protein-coupled receptor signaling pathway);GO:0019216(regulation of lipid metabolic process);GO:0060736(prostate gland growth);GO:0060742(epithelial …	00600(Sphingolipid metabolism);04142(Lysosome)	prosaposin like 1 [Source:HGNC Symbol;Acc:HGNC:33131]	protein_coding	0.619443	0.451314	0.242998	0.184903	0.053318	0	0.000175288	0.00497479
ENSG00000277739	5_8S_rRNA	ENST00000610460	GO:0003735(structural constituent of ribosome);GO:0005840(ribosome)	NA	5.8S ribosomal RNA [Source:RFAM;Acc:RF00002]	rRNA	5.59311	3.39337	8.4853	9.10991	0.641659	0.390775	0.000182104	0.00515847
ENSG00000179222	MAGED1	ENST00000485420;ENST00000375772;ENST00000326587;ENST00000494718;ENST00000375722;ENST00000482599;ENST00000473931;ENST00000375695	GO:0000122(negative regulation of transcription by RNA polymerase II);GO:0000785(chromatin);GO:0003713(transcription coactivator activity);GO:0005515(protein binding);GO:0005634(nucleus);GO:0005737(cytoplasm);GO:0005886(plasma membrane);GO:0006355(regulation of DNA-templated transcription);GO:0006357(regulation of transcription by RNA polymerase II);GO:0016020(membrane);GO:0032922(circadian regul…	04722(Neurotrophin signaling pathway);04722(Neurotrophin signaling pathway)	MAGE family member D1 [Source:HGNC Symbol;Acc:HGNC:6813]	processed_transcript;protein_coding	23.0045	22.9998	20.1376	20.7657	41.9059	44.5723	0.000183273	0.00517202
ENSG00000179965	ZNF771	ENST00000319296;ENST00000564550;ENST00000566625;ENST00000434417	GO:0000978(RNA polymerase II cis-regulatory region sequence-specific DNA binding);GO:0000981(DNA-binding transcription factor activity, RNA polymerase II-specific);GO:0003677(DNA binding);GO:0005634(nucleus);GO:0005654(nucleoplasm);GO:0005730(nucleolus);GO:0006357(regulation of transcription by RNA polymerase II);GO:0046872(metal ion binding);GO:1990837(sequence-specific double-stranded DNA bindi…	NA	zinc finger protein 771 [Source:HGNC Symbol;Acc:HGNC:29653]	protein_coding	1.47475	1.1736	1.45461	1.25479	0.289849	0.471361	0.000183262	0.00517202
ENSG00000112309	B3GAT2	ENST00000230053	GO:0000139(Golgi membrane);GO:0005794(Golgi apparatus);GO:0005975(carbohydrate metabolic process);GO:0006486(protein glycosylation);GO:0015018(galactosylgalactosylxylosylprotein 3-beta-glucuronosyltransferase activity);GO:0016020(membrane);GO:0016021(integral component of membrane);GO:0016051(carbohydrate biosynthetic process);GO:0016740(transferase activity);GO:0046872(metal ion binding);GO:0050…	00515(Mannose type O-glycan biosynthesis);01100(Metabolic pathways)	beta-1,3-glucuronyltransferase 2 [Source:HGNC Symbol;Acc:HGNC:922]	protein_coding	0.426549	2.61046	0.250184	0.449628	0.088632	0.30305	0.000186555	0.00525476
ENSG00000165731	RET	ENST00000340058;ENST00000355710;ENST00000683007;ENST00000640619;ENST00000615310;ENST00000498820;ENST00000683872;ENST00000684216;ENST00000638465;ENST00000671844	GO:0000165(MAPK cascade);GO:0000166(nucleotide binding);GO:0001657(ureteric bud development);GO:0001755(neural crest cell migration);GO:0001838(embryonic epithelial tube formation);GO:0004672(protein kinase activity);GO:0004712(protein serine/threonine/tyrosine kinase activity);GO:0004713(protein tyrosine kinase activity);GO:0004714(transmembrane receptor protein tyrosine kinase activity);GO:0005…	04020(Calcium signaling pathway);05200(Pathways in cancer);05216(Thyroid cancer);05223(Non-small cell lung cancer);05230(Central carbon metabolism in cancer);05230(Central carbon metabolism in cancer)	ret proto-oncogene [Source:HGNC Symbol;Acc:HGNC:9967]	protein_coding;retained_intron;nonsense_mediated_decay	22.4341	25.5869	14.3914	13.9349	10.6634	9.39032	0.000194434	0.00545884
ENSG00000088002	SULT2B1	ENST00000201586;ENST00000323090;ENST00000594274;ENST00000597923	GO:0003676(nucleic acid binding);GO:0004027(alcohol sulfotransferase activity);GO:0005515(protein binding);GO:0005634(nucleus);GO:0005737(cytoplasm);GO:0005783(endoplasmic reticulum);GO:0005829(cytosol);GO:0006629(lipid metabolic process);GO:0008146(sulfotransferase activity);GO:0008202(steroid metabolic process);GO:0008203(cholesterol metabolic process);GO:0008285(negative regulation of cell pop…	00140(Steroid hormone biosynthesis);00140(Steroid hormone biosynthesis)	sulfotransferase family 2B member 1 [Source:HGNC Symbol;Acc:HGNC:11459]	protein_coding;processed_transcript;retained_intron	30.1277	27.1161	14.9568	13.3624	13.23	12.4903	0.000194529	0.00545884
ENSG00000179542	SLITRK4	ENST00000356928;ENST00000338017;ENST00000596188	GO:0005515(protein binding);GO:0005886(plasma membrane);GO:0007409(axonogenesis);GO:0016020(membrane);GO:0016021(integral component of membrane);GO:0050807(regulation of synapse organization);GO:0051965(positive regulation of synapse assembly);GO:0098978(glutamatergic synapse);GO:1905606(regulation of presynapse assembly);GO:1905606(regulation of presynapse assembly)	NA	SLIT and NTRK like family member 4 [Source:HGNC Symbol;Acc:HGNC:23502]	protein_coding	0.210866	0.274332	0.129335	0.135079	0.693473	0.420828	0.000199151	0.00557809
ENSG00000106991	ENG	ENST00000344849;ENST00000486329;ENST00000373203;ENST00000480266	GO:0000122(negative regulation of transcription by RNA polymerase II);GO:0001525(angiogenesis);GO:0001569(branching involved in blood vessel morphogenesis);GO:0001570(vasculogenesis);GO:0001666(response to hypoxia);GO:0001837(epithelial to mesenchymal transition);GO:0001934(positive regulation of protein phosphorylation);GO:0001937(negative regulation of endothelial cell proliferation);GO:0001947…	NA	endoglin [Source:HGNC Symbol;Acc:HGNC:3349]	protein_coding;processed_transcript	1.1648	0.600927	0.129202	0.276631	0.151359	0.183402	0.000202116	0.00565056
ENSG00000103260	METRN	ENST00000219542;ENST00000564661;ENST00000568223;ENST00000568415;ENST00000570132	GO:0005179(hormone activity);GO:0005576(extracellular region);GO:0005615(extracellular space);GO:0007165(signal transduction);GO:0007399(nervous system development);GO:0007409(axonogenesis);GO:0010001(glial cell differentiation);GO:0030154(cell differentiation);GO:0050772(positive regulation of axonogenesis);GO:0060019(radial glial cell differentiation);GO:0060019(radial glial cell differentiatio…	NA	meteorin, glial cell differentiation regulator [Source:HGNC Symbol;Acc:HGNC:14151]	protein_coding;retained_intron;nonsense_mediated_decay	11.0331	8.02103	9.22981	6.28881	2.82397	3.70313	0.000207777	0.00579801
ENSG00000112852	PCDHB2	ENST00000622947;ENST00000194155;ENST00000624874	GO:0005509(calcium ion binding);GO:0005886(plasma membrane);GO:0005887(integral component of plasma membrane);GO:0007155(cell adhesion);GO:0007156(homophilic cell adhesion via plasma membrane adhesion molecules);GO:0007268(chemical synaptic transmission);GO:0007399(nervous system development);GO:0007416(synapse assembly);GO:0016020(membrane);GO:0016021(integral component of membrane);GO:0016339(c…	NA	protocadherin beta 2 [Source:HGNC Symbol;Acc:HGNC:8687]	protein_coding	10.8011	13.9706	8.53049	10.3924	4.9245	4.48749	0.000209827	0.00583351
ENSG00000111885	MAN1A1	ENST00000368468	GO:0000139(Golgi membrane);GO:0004571(mannosyl-oligosaccharide 1,2-alpha-mannosidase activity);GO:0005509(calcium ion binding);GO:0005783(endoplasmic reticulum);GO:0005793(endoplasmic reticulum-Golgi intermediate compartment);GO:0005794(Golgi apparatus);GO:0005829(cytosol);GO:0005975(carbohydrate metabolic process);GO:0006486(protein glycosylation);GO:0006491(N-glycan processing);GO:0008152(metab…	00510(N-Glycan biosynthesis);00513(Various types of N-glycan biosynthesis);01100(Metabolic pathways);04141(Protein processing in endoplasmic reticulum)	mannosidase alpha class 1A member 1 [Source:HGNC Symbol;Acc:HGNC:6821]	protein_coding	4.14902	6.87501	3.94537	4.61267	11.8251	9.65317	0.000211167	0.00585989
ENSG00000105219	CCNP	ENST00000430325;ENST00000593335;ENST00000221818;ENST00000599263;ENST00000513948	GO:0000079(regulation of cyclin-dependent protein serine/threonine kinase activity);GO:0000307(cyclin-dependent protein kinase holoenzyme complex);GO:0005634(nucleus);GO:0005737(cytoplasm);GO:0016538(cyclin-dependent protein serine/threonine kinase regulator activity);GO:0044772(mitotic cell cycle phase transition);GO:0097124(cyclin A2-CDK2 complex);GO:0097124(cyclin A2-CDK2 complex)	NA	cyclin P [Source:HGNC Symbol;Acc:HGNC:25805]	protein_coding;retained_intron;nonsense_mediated_decay	1.3245	0.473143	2.19378	0.913206	0.146792	0	0.000213648	0.00591777
ENSG00000104967	NOVA2	ENST00000676183;ENST00000263257	GO:0000381(regulation of alternative mRNA splicing, via spliceosome);GO:0000398(mRNA splicing, via spliceosome);GO:0003676(nucleic acid binding);GO:0003723(RNA binding);GO:0003729(mRNA binding);GO:0005634(nucleus);GO:0005737(cytoplasm);GO:0006397(mRNA processing);GO:0007399(nervous system development);GO:0008380(RNA splicing);GO:0010468(regulation of gene expression);GO:0021954(central nervous sy…	NA	NOVA alternative splicing regulator 2 [Source:HGNC Symbol;Acc:HGNC:7887]	protein_coding	0.0279903	0.0164998	0.0220435	0.05251	0.228071	0.165863	0.000214694	0.00593576
ENSG00000130741	EIF2S3	ENST00000253039;ENST00000487075;ENST00000423068;ENST00000460032	GO:0000049(tRNA binding);GO:0000166(nucleotide binding);GO:0001731(formation of translation preinitiation complex);GO:0003743(translation initiation factor activity);GO:0003924(GTPase activity);GO:0005515(protein binding);GO:0005525(GTP binding);GO:0005737(cytoplasm);GO:0005829(cytosol);GO:0005850(eukaryotic translation initiation factor 2 complex);GO:0006412(translation);GO:0006413(translational…	03013(RNA transport);03013(RNA transport)	eukaryotic translation initiation factor 2 subunit gamma [Source:HGNC Symbol;Acc:HGNC:3267]	protein_coding;processed_transcript	37.6591	36.7577	40.2911	41.3308	75.385	78.9474	0.000220553	0.00607533
ENSG00000159247	TUBBP5	ENST00000290377;ENST00000503395;ENST00000635438	NA	NA	tubulin beta pseudogene 5 [Source:HGNC Symbol;Acc:HGNC:23674]	processed_transcript	3.80644	4.46384	5.74129	6.55024	2.06097	1.85671	0.000221356	0.00608626
ENSG00000119574	ZBTB45	ENST00000354590;ENST00000600990;ENST00000594051;ENST00000596739	GO:0000122(negative regulation of transcription by RNA polymerase II);GO:0000978(RNA polymerase II cis-regulatory region sequence-specific DNA binding);GO:0001227(DNA-binding transcription repressor activity, RNA polymerase II-specific);GO:0003677(DNA binding);GO:0005515(protein binding);GO:0005634(nucleus);GO:0005654(nucleoplasm);GO:0006357(regulation of transcription by RNA polymerase II);GO:00…	NA	zinc finger and BTB domain containing 45 [Source:HGNC Symbol;Acc:HGNC:23715]	protein_coding	5.88727	9.02382	5.51141	8.28104	2.59322	2.45667	0.000226081	0.00620482
ENSG00000165029	ABCA1	ENST00000678995	GO:0000166(nucleotide binding);GO:0002790(peptide secretion);GO:0005102(signaling receptor binding);GO:0005319(lipid transporter activity);GO:0005515(protein binding);GO:0005524(ATP binding);GO:0005548(phospholipid transporter activity);GO:0005768(endosome);GO:0005789(endoplasmic reticulum membrane);GO:0005794(Golgi apparatus);GO:0005886(plasma membrane);GO:0005887(integral component of plasma me…	02010(ABC transporters);04975(Fat digestion and absorption);04979(Cholesterol metabolism)	ATP binding cassette subfamily A member 1 [Source:HGNC Symbol;Acc:HGNC:29]	protein_coding	0.0616096	0.0806721	0.0294516	0.0190552	0.23003	0.154785	0.000226745	0.00621164
ENSG00000100726	TELO2	ENST00000262319;ENST00000567427;ENST00000568240;ENST00000563676;ENST00000567423;ENST00000564507;ENST00000569744;ENST00000497339	GO:0000781(chromosome, telomeric region);GO:0005515(protein binding);GO:0005634(nucleus);GO:0005694(chromosome);GO:0005737(cytoplasm);GO:0005829(cytosol);GO:0007004(telomere maintenance via telomerase);GO:0016020(membrane);GO:0016604(nuclear body);GO:0019901(protein kinase binding);GO:0031931(TORC1 complex);GO:0031932(TORC2 complex);GO:0032006(regulation of TOR signaling);GO:0034399(nuclear perip…	03460(Fanconi anemia pathway);04150(mTOR signaling pathway);04150(mTOR signaling pathway)	telomere maintenance 2 [Source:HGNC Symbol;Acc:HGNC:29099]	protein_coding;processed_transcript;retained_intron;nonsense_mediated_decay	17.421	22.5587	19.6175	20.0935	9.03048	8.45005	0.000232571	0.00635962
ENSG00000253154	ENSG00000253154	ENST00000690821;ENST00000648211;ENST00000701641;ENST00000517368;ENST00000702031	NA	NA	novel transcript	lncRNA;retained_intron	0.450879	0.174694	0.212393	0.0762437	0.873621	0.9219	0.000233968	0.00638584
ENSG00000110436	SLC1A2	ENST00000278379;ENST00000643454;ENST00000645984;ENST00000643154;ENST00000645966;ENST00000644779;ENST00000642392;ENST00000642216;ENST00000642224;ENST00000645659	GO:0005313(L-glutamate transmembrane transporter activity);GO:0005314(high-affinity L-glutamate transmembrane transporter activity);GO:0005515(protein binding);GO:0005886(plasma membrane);GO:0005887(integral component of plasma membrane);GO:0006750(glutathione biosynthetic process);GO:0006811(ion transport);GO:0006836(neurotransmitter transport);GO:0006865(amino acid transport);GO:0007268(chemica…	04721(Synaptic vesicle cycle);04724(Glutamatergic synapse);05014(Amyotrophic lateral sclerosis);05016(Huntington disease);05016(Huntington disease)	solute carrier family 1 member 2 [Source:HGNC Symbol;Acc:HGNC:10940]	protein_coding;retained_intron;processed_transcript	0.120887	0.12912	0.153364	0.257465	0.50531	0.365679	0.000234382	0.00638584
ENSG00000170477	KRT4	ENST00000551956;ENST00000549295;ENST00000551436	GO:0005515(protein binding);GO:0005634(nucleus);GO:0005829(cytosol);GO:0005882(intermediate filament);GO:0007010(cytoskeleton organization);GO:0009986(cell surface);GO:0030280(structural constituent of skin epidermis);GO:0030855(epithelial cell differentiation);GO:0031424(keratinization);GO:0045095(keratin filament);GO:0045109(intermediate filament organization);GO:0045111(intermediate filament c…	NA	keratin 4 [Source:HGNC Symbol;Acc:HGNC:6441]	protein_coding;retained_intron	0.698894	1.44921	0.533187	0.488077	0.201005	0.0885658	0.00023644	0.00643023
ENSG00000186462	NAP1L2	ENST00000373517	GO:0000785(chromatin);GO:0003682(chromatin binding);GO:0005515(protein binding);GO:0005634(nucleus);GO:0006334(nucleosome assembly);GO:0016573(histone acetylation);GO:0030182(neuron differentiation);GO:0035066(positive regulation of histone acetylation);GO:0042393(histone binding);GO:0043970(histone H3-K9 acetylation);GO:0044154(histone H3-K14 acetylation);GO:0045666(positive regulation of neuron…	NA	nucleosome assembly protein 1 like 2 [Source:HGNC Symbol;Acc:HGNC:7638]	protein_coding	1.14993	1.30386	2.00549	1.29709	4.1241	3.57446	0.000236888	0.00643075
ENSG00000096006	CRISP3	ENST00000263045;ENST00000433368;ENST00000354620	GO:0003674(molecular_function);GO:0005515(protein binding);GO:0005576(extracellular region);GO:0005615(extracellular space);GO:0006952(defense response);GO:0016020(membrane);GO:0016021(integral component of membrane);GO:0031012(extracellular matrix);GO:0035580(specific granule lumen);GO:0042581(specific granule);GO:0045087(innate immune response);GO:1904724(tertiary granule lumen);GO:1904724(tert…	NA	cysteine rich secretory protein 3 [Source:HGNC Symbol;Acc:HGNC:16904]	protein_coding	0.597604	0.893868	0.612621	1.22274	2.62327	2.85842	0.000240428	0.00651503
ENSG00000171222	SCAND1	ENST00000305978;ENST00000373991;ENST00000615116	GO:0005515(protein binding);GO:0005634(nucleus);GO:0045893(positive regulation of DNA-templated transcription);GO:0045893(positive regulation of DNA-templated transcription)	NA	SCAN domain containing 1 [Source:HGNC Symbol;Acc:HGNC:10566]	protein_coding	21.585	14.3963	20.2181	10.4281	4.45577	6.62793	0.000241625	0.00653564
ENSG00000147804	SLC39A4	ENST00000532718;ENST00000531013;ENST00000529462;ENST00000530807;ENST00000276833;ENST00000527148;ENST00000301305	GO:0005385(zinc ion transmembrane transporter activity);GO:0005768(endosome);GO:0005886(plasma membrane);GO:0005887(integral component of plasma membrane);GO:0006811(ion transport);GO:0006829(zinc ion transport);GO:0006882(cellular zinc ion homeostasis);GO:0016020(membrane);GO:0016021(integral component of membrane);GO:0016324(apical plasma membrane);GO:0030001(metal ion transport);GO:0031410(cyt…	04978(Mineral absorption);04978(Mineral absorption)	solute carrier family 39 member 4 [Source:HGNC Symbol;Acc:HGNC:17129]	processed_transcript;retained_intron;protein_coding	7.15219	5.98517	6.66125	3.74659	1.83229	2.48105	0.000242194	0.00653924
ENSG00000142634	EFHD2	ENST00000375980;ENST00000445566	GO:0005509(calcium ion binding);GO:0016020(membrane);GO:0045121(membrane raft);GO:0045296(cadherin binding);GO:0046872(metal ion binding);GO:0046872(metal ion binding)	NA	EF-hand domain family member D2 [Source:HGNC Symbol;Acc:HGNC:28670]	protein_coding	26.0716	26.4703	17.7428	17.9593	10.372	10.902	0.00024544	0.00661497
ENSG00000149582	TMEM25	ENST00000524725;ENST00000526941;ENST00000531494;ENST00000527785;ENST00000313236;ENST00000359862;ENST00000526853;ENST00000354284;ENST00000442938;ENST00000533102;ENST00000533627;ENST00000411589;ENST00000533587;ENST00000525298;ENST00000524522	GO:0005515(protein binding);GO:0005576(extracellular region);GO:0005764(lysosome);GO:0005768(endosome);GO:0005770(late endosome);GO:0005886(plasma membrane);GO:0016020(membrane);GO:0016021(integral component of membrane);GO:0031647(regulation of protein stability);GO:0090394(negative regulation of excitatory postsynaptic potential);GO:0090394(negative regulation of excitatory postsynaptic potenti…	NA	transmembrane protein 25 [Source:HGNC Symbol;Acc:HGNC:25890]	protein_coding;retained_intron;processed_transcript	0.212911	0.33245	0.315308	0.415858	1.02635	0.976054	0.000248104	0.00666279
ENSG00000213599	SLX1A-SULT1A3	ENST00000568997;ENST00000565342;ENST00000566712;ENST00000569959;ENST00000567520;ENST00000561824	NA	NA	SLX1A-SULT1A3 readthrough (NMD candidate) [Source:HGNC Symbol;Acc:HGNC:44437]	retained_intron;lncRNA	8.76578	5.60696	5.79975	5.49189	2.71316	2.43612	0.000268852	0.00720707
ENSG00000183092	BEGAIN	ENST00000554140;ENST00000556751;ENST00000637716;ENST00000554356;ENST00000556188;ENST00000554274;ENST00000557378;ENST00000637646	GO:0005515(protein binding);GO:0005737(cytoplasm);GO:0016020(membrane);GO:0016301(kinase activity);GO:0016310(phosphorylation);GO:0045202(synapse);GO:0098962(regulation of postsynaptic neurotransmitter receptor activity);GO:0098962(regulation of postsynaptic neurotransmitter receptor activity)	NA	brain enriched guanylate kinase associated [Source:HGNC Symbol;Acc:HGNC:24163]	protein_coding;retained_intron	0.341631	0.518185	0.306642	0.543897	0.109695	0.0622912	0.000273567	0.00732037
ENSG00000116711	PLA2G4A	ENST00000367466	GO:0000139(Golgi membrane);GO:0001516(prostaglandin biosynthetic process);GO:0002827(positive regulation of T-helper 1 type immune response);GO:0004620(phospholipase activity);GO:0004622(lysophospholipase activity);GO:0004623(phospholipase A2 activity);GO:0005509(calcium ion binding);GO:0005544(calcium-dependent phospholipid binding);GO:0005634(nucleus);GO:0005635(nuclear envelope);GO:0005737(cyt…	00564(Glycerophospholipid metabolism);00565(Ether lipid metabolism);00590(Arachidonic acid metabolism);00591(Linoleic acid metabolism);00592(alpha-Linolenic acid metabolism);01100(Metabolic pathways);04010(MAPK signaling pathway);04014(Ras signaling pathway);04072(Phospholipase D signaling pathway);04217(Necroptosis);04270(Vascular smooth muscle contraction);04370(VEGF signaling pathway);04611(Pl…	phospholipase A2 group IVA [Source:HGNC Symbol;Acc:HGNC:9035]	protein_coding	0.576646	0.474045	0.401157	0.090731	0.026347	0.031372	0.000276846	0.00738263
ENSG00000168405	CMAHP	ENST00000643807;ENST00000377989;ENST00000493981;ENST00000490939;ENST00000471416;ENST00000642554;ENST00000458373;ENST00000493257	NA	NA	cytidine monophospho-N-acetylneuraminic acid hydroxylase, pseudogene [Source:HGNC Symbol;Acc:HGNC:2098]	processed_transcript;retained_intron	0.299855	0.367316	0.805309	0.67937	0.226146	0.097482	0.000276879	0.00738263
ENSG00000255508	ENSG00000255508	ENST00000496634;ENST00000526409;ENST00000534745	GO:0003676(nucleic acid binding);GO:0003723(RNA binding);GO:0004652(polynucleotide adenylyltransferase activity);GO:0016740(transferase activity);GO:0016779(nucleotidyltransferase activity);GO:0043231(intracellular membrane-bounded organelle);GO:0043231(intracellular membrane-bounded organelle)	NA	novel protein	nonsense_mediated_decay;retained_intron	9.14671	3.80612	5.7687	13.3691	40.4325	12.6816	0.000285392	0.00759609
ENSG00000182836	PLCXD3	ENST00000377801	GO:0005515(protein binding);GO:0005737(cytoplasm);GO:0006629(lipid metabolic process);GO:0007165(signal transduction);GO:0008081(phosphoric diester hydrolase activity);GO:0016042(lipid catabolic process);GO:0016787(hydrolase activity);GO:0045202(synapse)	NA	phosphatidylinositol specific phospholipase C X domain containing 3 [Source:HGNC Symbol;Acc:HGNC:31822]	protein_coding	0.0175465	0.0358115	0	0.0205151	0.160544	0.221038	0.000292167	0.00776262
ENSG00000224877	NDUFAF8	ENST00000573090;ENST00000431388;ENST00000577158;ENST00000575067;ENST00000573173;ENST00000576002	GO:0005515(protein binding);GO:0005739(mitochondrion);GO:0032981(mitochondrial respiratory chain complex I assembly);GO:0032981(mitochondrial respiratory chain complex I assembly)	NA	NADH:ubiquinone oxidoreductase complex assembly factor 8 [Source:HGNC Symbol;Acc:HGNC:33551]	retained_intron;protein_coding;processed_transcript	6.67517	3.86641	5.37001	3.71237	1.3107	1.36058	0.000297483	0.00788989
ENSG00000166313	APBB1	ENST00000609360;ENST00000526240	GO:0000122(negative regulation of transcription by RNA polymerase II);GO:0001540(amyloid-beta binding);GO:0003682(chromatin binding);GO:0003713(transcription coactivator activity);GO:0005515(protein binding);GO:0005634(nucleus);GO:0005654(nucleoplasm);GO:0005737(cytoplasm);GO:0005783(endoplasmic reticulum);GO:0005886(plasma membrane);GO:0006325(chromatin organization);GO:0006355(regulation of DNA…	05010(Alzheimer disease);05010(Alzheimer disease)	amyloid beta precursor protein binding family B member 1 [Source:HGNC Symbol;Acc:HGNC:581]	protein_coding;processed_transcript	0.0322776	0.0149376	0.0337801	0.0303777	0.239451	0.222594	0.000298953	0.00791486
ENSG00000152034	MCHR2	ENST00000281806	GO:0004930(G protein-coupled receptor activity);GO:0005886(plasma membrane);GO:0005887(integral component of plasma membrane);GO:0007165(signal transduction);GO:0007186(G protein-coupled receptor signaling pathway);GO:0007218(neuropeptide signaling pathway);GO:0008528(G protein-coupled peptide receptor activity);GO:0016020(membrane);GO:0016021(integral component of membrane)	04080(Neuroactive ligand-receptor interaction)	melanin concentrating hormone receptor 2 [Source:HGNC Symbol;Acc:HGNC:20867]	protein_coding	0.141421	0.269765	0.459645	0.307485	0	0.029601	0.00030189	0.00797851
ENSG00000124343	XG	ENST00000381174;ENST00000644266;ENST00000503018;ENST00000519244	GO:0003674(molecular_function);GO:0005886(plasma membrane);GO:0005887(integral component of plasma membrane);GO:0008150(biological_process);GO:0016020(membrane);GO:0016021(integral component of membrane);GO:0034109(homotypic cell-cell adhesion);GO:0072683(T cell extravasation);GO:2000391(positive regulation of neutrophil extravasation);GO:2000391(positive regulation of neutrophil extravasation)	NA	Xg glycoprotein (Xg blood group) [Source:HGNC Symbol;Acc:HGNC:12806]	protein_coding;retained_intron	1.65925	0.853744	1.49673	1.12348	0.237607	0.347795	0.000303488	0.00800664
ENSG00000135114	OASL	ENST00000257570;ENST00000339275;ENST00000681590;ENST00000680750;ENST00000543677;ENST00000680620;ENST00000680485;ENST00000681005	GO:0001730(2'-5'-oligoadenylate synthetase activity);GO:0002376(immune system process);GO:0003677(DNA binding);GO:0003723(RNA binding);GO:0003725(double-stranded RNA binding);GO:0005515(protein binding);GO:0005634(nucleus);GO:0005654(nucleoplasm);GO:0005730(nucleolus);GO:0005737(cytoplasm);GO:0005829(cytosol);GO:0009615(response to virus);GO:0016020(membrane);GO:0016779(nucleotidyltransferase act…	05165(Human papillomavirus infection);05165(Human papillomavirus infection)	2'-5'-oligoadenylate synthetase like [Source:HGNC Symbol;Acc:HGNC:8090]	protein_coding;nonsense_mediated_decay;retained_intron	1.19	0.668958	0.969409	0.888509	0.299773	0.0906116	0.000309495	0.00815075
ENSG00000176170	SPHK1	ENST00000592299;ENST00000323374;ENST00000591762;ENST00000392496;ENST00000587167;ENST00000590959	GO:0000166(nucleotide binding);GO:0000287(magnesium ion binding);GO:0001568(blood vessel development);GO:0001727(lipid kinase activity);GO:0003376(sphingosine-1-phosphate receptor signaling pathway);GO:0003677(DNA binding);GO:0003951(NAD+ kinase activity);GO:0005515(protein binding);GO:0005516(calmodulin binding);GO:0005524(ATP binding);GO:0005634(nucleus);GO:0005737(cytoplasm);GO:0005768(endosom…	00600(Sphingolipid metabolism);01100(Metabolic pathways);04020(Calcium signaling pathway);04071(Sphingolipid signaling pathway);04072(Phospholipase D signaling pathway);04370(VEGF signaling pathway);04371(Apelin signaling pathway);04666(Fc gamma R-mediated phagocytosis);05152(Tuberculosis);05152(Tuberculosis)	sphingosine kinase 1 [Source:HGNC Symbol;Acc:HGNC:11240]	protein_coding;retained_intron	3.08275	3.83397	1.92777	2.51165	0.926037	1.19882	0.00031261	0.00821835
ENSG00000204792	LINC01291	ENST00000418204;ENST00000377469	NA	NA	long intergenic non-protein coding RNA 1291 [Source:HGNC Symbol;Acc:HGNC:50358]	lncRNA	0	0.0669604	0.0291794	0.168318	1.17517	0.309243	0.000317787	0.00833982
ENSG00000131116	ZNF428	ENST00000598676;ENST00000300811;ENST00000595304	GO:0005515(protein binding);GO:0046872(metal ion binding);GO:0046872(metal ion binding)	NA	zinc finger protein 428 [Source:HGNC Symbol;Acc:HGNC:20804]	protein_coding;retained_intron	21.1987	14.544	20.2141	11.4718	3.85692	7.0438	0.000323669	0.00846453
ENSG00000165949	IFI27	ENST00000618863;ENST00000621160;ENST00000614648;ENST00000616764;ENST00000618200;ENST00000555081;ENST00000614288;ENST00000614204;ENST00000557700;ENST00000612499	GO:0000122(negative regulation of transcription by RNA polymerase II);GO:0002376(immune system process);GO:0003674(molecular_function);GO:0005515(protein binding);GO:0005521(lamin binding);GO:0005634(nucleus);GO:0005635(nuclear envelope);GO:0005637(nuclear inner membrane);GO:0005739(mitochondrion);GO:0005741(mitochondrial outer membrane);GO:0005783(endoplasmic reticulum);GO:0005789(endoplasmic re…	NA	interferon alpha inducible protein 27 [Source:HGNC Symbol;Acc:HGNC:5397]	protein_coding;retained_intron;nonsense_mediated_decay	2.25359	1.31316	2.32218	1.18467	0.395107	0.520385	0.000331125	0.00864443
ENSG00000175756	AURKAIP1	ENST00000321751;ENST00000378853;ENST00000338338;ENST00000489799;ENST00000338370;ENST00000496905	GO:0005515(protein binding);GO:0005634(nucleus);GO:0005654(nucleoplasm);GO:0005739(mitochondrion);GO:0005743(mitochondrial inner membrane);GO:0005763(mitochondrial small ribosomal subunit);GO:0005840(ribosome);GO:0006397(mRNA processing);GO:0032543(mitochondrial translation);GO:0043231(intracellular membrane-bounded organelle);GO:0045839(negative regulation of mitotic nuclear division);GO:0045862…	NA	aurora kinase A interacting protein 1 [Source:HGNC Symbol;Acc:HGNC:24114]	protein_coding;processed_transcript	93.4682	54.6458	75.1416	42.6428	21.5224	29.0651	0.00033202	0.00865274
ENSG00000205730	ITPRIPL2	ENST00000381440;ENST00000566735	GO:0016020(membrane);GO:0016021(integral component of membrane);GO:0016021(integral component of membrane)	NA	ITPRIP like 2 [Source:HGNC Symbol;Acc:HGNC:27257]	protein_coding;processed_transcript	0.422535	0.620711	0.670528	1.23285	1.89111	1.63173	0.000341405	0.00888187
ENSG00000140391	TSPAN3	ENST00000561277;ENST00000560715;ENST00000267970;ENST00000559373;ENST00000560514	GO:0003674(molecular_function);GO:0005887(integral component of plasma membrane);GO:0008150(biological_process);GO:0016020(membrane);GO:0016021(integral component of membrane);GO:0070062(extracellular exosome);GO:0070062(extracellular exosome)	NA	tetraspanin 3 [Source:HGNC Symbol;Acc:HGNC:17752]	protein_coding;retained_intron;processed_transcript	6.19371	6.48683	7.90014	7.12525	12.0457	15.1228	0.000342416	0.00889274
ENSG00000162009	SSTR5	ENST00000293897	GO:0004930(G protein-coupled receptor activity);GO:0004994(somatostatin receptor activity);GO:0005515(protein binding);GO:0005886(plasma membrane);GO:0005887(integral component of plasma membrane);GO:0007165(signal transduction);GO:0007186(G protein-coupled receptor signaling pathway);GO:0007187(G protein-coupled receptor signaling pathway, coupled to cyclic nucleotide second messenger);GO:000721…	04024(cAMP signaling pathway);04080(Neuroactive ligand-receptor interaction);04935(Growth hormone synthesis, secretion and action)	somatostatin receptor 5 [Source:HGNC Symbol;Acc:HGNC:11334]	protein_coding	1.08894	0.649917	0.251385	0.438946	0.0820404	0.129895	0.000351041	0.009079
ENSG00000120738	EGR1	ENST00000239938	GO:0000122(negative regulation of transcription by RNA polymerase II);GO:0000785(chromatin);GO:0000976(transcription cis-regulatory region binding);GO:0000977(RNA polymerase II transcription regulatory region sequence-specific DNA binding);GO:0000978(RNA polymerase II cis-regulatory region sequence-specific DNA binding);GO:0000981(DNA-binding transcription factor activity, RNA polymerase II-speci…	04371(Apelin signaling pathway);04912(GnRH signaling pathway);04928(Parathyroid hormone synthesis, secretion and action);04933(AGE-RAGE signaling pathway in diabetic complications);05020(Prion disease);05166(Human T-cell leukemia virus 1 infection)	early growth response 1 [Source:HGNC Symbol;Acc:HGNC:3238]	protein_coding	11.015	17.6419	16.6142	31.8779	9.11815	6.98013	0.000351406	0.009079
ENSG00000254087	LYN	ENST00000520220;ENST00000519728	GO:0000166(nucleotide binding);GO:0001782(B cell homeostasis);GO:0001817(regulation of cytokine production);GO:0001932(regulation of protein phosphorylation);GO:0001933(negative regulation of protein phosphorylation);GO:0001934(positive regulation of protein phosphorylation);GO:0002223(stimulatory C-type lectin receptor signaling pathway);GO:0002244(hematopoietic progenitor cell differentiation);…	04062(Chemokine signaling pathway);04064(NF-kappa B signaling pathway);04611(Platelet activation);04662(B cell receptor signaling pathway);04664(Fc epsilon RI signaling pathway);04666(Fc gamma R-mediated phagocytosis);04730(Long-term depression);05120(Epithelial cell signaling in Helicobacter pylori infection);05167(Kaposi sarcoma-associated herpesvirus infection);05169(Epstein-Barr virus infecti…	LYN proto-oncogene, Src family tyrosine kinase [Source:HGNC Symbol;Acc:HGNC:6735]	protein_coding	2.43411	3.22733	1.58547	1.69597	4.70915	3.93789	0.000356052	0.00918321
ENSG00000107201	DDX58	ENST00000679771;ENST00000681352;ENST00000379883;ENST00000681448;ENST00000679662;ENST00000680883;ENST00000679665	GO:0000166(nucleotide binding);GO:0002230(positive regulation of defense response to virus by host);GO:0002376(immune system process);GO:0002735(positive regulation of myeloid dendritic cell cytokine production);GO:0003676(nucleic acid binding);GO:0003690(double-stranded DNA binding);GO:0003723(RNA binding);GO:0003724(RNA helicase activity);GO:0003725(double-stranded RNA binding);GO:0003727(singl…	04064(NF-kappa B signaling pathway);04622(RIG-I-like receptor signaling pathway);04623(Cytosolic DNA-sensing pathway);05160(Hepatitis C);05161(Hepatitis B);05162(Measles);05164(Influenza A);05168(Herpes simplex virus 1 infection);05169(Epstein-Barr virus infection);05171(Coronavirus disease - COVID-19);05171(Coronavirus disease - COVID-19)	DExD/H-box helicase 58 [Source:HGNC Symbol;Acc:HGNC:19102]	nonsense_mediated_decay;retained_intron;protein_coding	3.19076	2.12032	4.26254	2.95584	1.33184	1.20896	0.000357574	0.009194
ENSG00000164176	EDIL3	ENST00000380138;ENST00000296591;ENST00000510271	GO:0005178(integrin binding);GO:0005201(extracellular matrix structural constituent);GO:0005509(calcium ion binding);GO:0005576(extracellular region);GO:0007155(cell adhesion);GO:0010811(positive regulation of cell-substrate adhesion);GO:0046872(metal ion binding);GO:0062023(collagen-containing extracellular matrix);GO:0070062(extracellular exosome);GO:1903561(extracellular vesicle);GO:1903561(ex…	NA	EGF like repeats and discoidin domains 3 [Source:HGNC Symbol;Acc:HGNC:3173]	protein_coding;processed_transcript	0.523296	0.834495	0.65178	0.195855	0.102855	0.0982015	0.000357698	0.009194
ENSG00000181704	YIPF6	ENST00000462683;ENST00000374622;ENST00000374643;ENST00000451537;ENST00000496576;ENST00000462972;ENST00000470730	GO:0000138(Golgi trans cisterna);GO:0000139(Golgi membrane);GO:0005515(protein binding);GO:0005737(cytoplasm);GO:0005783(endoplasmic reticulum);GO:0005794(Golgi apparatus);GO:0005797(Golgi medial cisterna);GO:0005801(cis-Golgi network);GO:0005802(trans-Golgi network);GO:0006888(endoplasmic reticulum to Golgi vesicle-mediated transport);GO:0016020(membrane);GO:0016021(integral component of membran…	NA	Yip1 domain family member 6 [Source:HGNC Symbol;Acc:HGNC:28304]	protein_coding;processed_transcript	2.20054	2.74589	2.98054	2.65588	6.05478	4.84147	0.000359726	0.00923029
ENSG00000169908	TM4SF1	ENST00000305366;ENST00000472441;ENST00000493348;ENST00000493298	GO:0001825(blastocyst formation);GO:0003674(molecular_function);GO:0005515(protein binding);GO:0005887(integral component of plasma membrane);GO:0008150(biological_process);GO:0016020(membrane);GO:0016021(integral component of membrane);GO:0016021(integral component of membrane)	NA	transmembrane 4 L six family member 1 [Source:HGNC Symbol;Acc:HGNC:11853]	protein_coding;nonsense_mediated_decay	2.55003	1.50053	2.25438	1.24157	0.376237	0.580091	0.000365784	0.00936971
ENSG00000275215	RNA5-8SN3	ENST00000613359	GO:0003735(structural constituent of ribosome);GO:0005840(ribosome)	03008(Ribosome biogenesis in eukaryotes);03010(Ribosome)	RNA, 5.8S ribosomal N3 [Source:HGNC Symbol;Acc:HGNC:53525]	rRNA	5.01963	3.70209	8.35836	8.04925	0.666538	0.481963	0.000367893	0.00940765
ENSG00000163155	LYSMD1	ENST00000368908;ENST00000440902	GO:0005515(protein binding);GO:0005654(nucleoplasm);GO:0005654(nucleoplasm)	NA	LysM domain containing 1 [Source:HGNC Symbol;Acc:HGNC:32070]	protein_coding	2.55827	2.98134	2.1428	1.98221	5.45003	5.86296	0.000368838	0.00940783
ENSG00000116584	ARHGEF2	ENST00000313695;ENST00000361247;ENST00000470541;ENST00000470874;ENST00000696600;ENST00000609707;ENST00000474428;ENST00000462460;ENST00000470975;ENST00000471589;ENST00000608543;ENST00000313667;ENST00000465079;ENST00000477754;ENST00000476273;ENST00000487755;ENST00000673475;ENST00000495070;ENST00000497907	GO:0000902(cell morphogenesis);GO:0002376(immune system process);GO:0005085(guanyl-nucleotide exchange factor activity);GO:0005515(protein binding);GO:0005737(cytoplasm);GO:0005794(Golgi apparatus);GO:0005819(spindle);GO:0005829(cytosol);GO:0005856(cytoskeleton);GO:0005874(microtubule);GO:0005886(plasma membrane);GO:0005923(bicellular tight junction);GO:0005925(focal adhesion);GO:0006886(intracel…	04530(Tight junction);05130(Pathogenic Escherichia coli infection);05131(Shigellosis);05418(Fluid shear stress and atherosclerosis);05418(Fluid shear stress and atherosclerosis)	Rho/Rac guanine nucleotide exchange factor 2 [Source:HGNC Symbol;Acc:HGNC:682]	protein_coding;nonsense_mediated_decay;processed_transcript;retained_intron	2.56248	3.31155	6.13425	5.48634	2.72485	2.27409	0.000369156	0.00940783
ENSG00000226085	UQCRFS1P1	ENST00000435169	NA	NA	ubiquinol-cytochrome c reductase, Rieske iron-sulfur polypeptide 1 pseudogene 1 [Source:HGNC Symbol;Acc:HGNC:12588]	processed_pseudogene	2.88939	2.77097	1.96757	3.23	0.461058	0.563043	0.000380349	0.00966022
ENSG00000213937	CLDN9	ENST00000445369	GO:0001618(virus receptor activity);GO:0005198(structural molecule activity);GO:0005515(protein binding);GO:0005886(plasma membrane);GO:0005923(bicellular tight junction);GO:0007155(cell adhesion);GO:0016020(membrane);GO:0016021(integral component of membrane);GO:0016338(calcium-independent cell-cell adhesion via plasma membrane cell-adhesion molecules);GO:0030054(cell junction);GO:0042802(identi…	04514(Cell adhesion molecules);04530(Tight junction);04670(Leukocyte transendothelial migration);05130(Pathogenic Escherichia coli infection);05160(Hepatitis C)	claudin 9 [Source:HGNC Symbol;Acc:HGNC:2051]	protein_coding	15.7302	9.4145	14.8838	10.255	4.59669	4.37047	0.000382354	0.00969471
ENSG00000159873	CCDC117	ENST00000421503;ENST00000249064;ENST00000453543	GO:0005515(protein binding);GO:0005634(nucleus);GO:0005737(cytoplasm);GO:0005819(spindle);GO:0005856(cytoskeleton);GO:0008284(positive regulation of cell population proliferation);GO:0045739(positive regulation of DNA repair);GO:0072686(mitotic spindle);GO:0072686(mitotic spindle)	NA	coiled-coil domain containing 117 [Source:HGNC Symbol;Acc:HGNC:26599]	protein_coding;nonsense_mediated_decay	13.2813	20.3137	16.9253	21.5994	38.4603	35.766	0.000383358	0.00970375
ENSG00000137509	PRCP	ENST00000680566;ENST00000524642;ENST00000681322;ENST00000531801;ENST00000679387;ENST00000531283;ENST00000313010;ENST00000681826;ENST00000532709;ENST00000681126;ENST00000393399;ENST00000623464;ENST00000528082;ENST00000680341;ENST00000679623;ENST00000681592;ENST00000527444	GO:0002155(regulation of thyroid hormone mediated signaling pathway);GO:0002353(plasma kallikrein-kinin cascade);GO:0003085(negative regulation of systemic arterial blood pressure);GO:0004180(carboxypeptidase activity);GO:0004185(serine-type carboxypeptidase activity);GO:0005515(protein binding);GO:0005764(lysosome);GO:0005886(plasma membrane);GO:0006508(proteolysis);GO:0008233(peptidase activity…	04614(Renin-angiotensin system);04974(Protein digestion and absorption);04974(Protein digestion and absorption)	prolylcarboxypeptidase [Source:HGNC Symbol;Acc:HGNC:9344]	protein_coding;retained_intron;nonsense_mediated_decay;processed_transcript;TEC	1.66623	1.31183	1.82827	1.76417	3.08663	3.38312	0.00038437	0.00971297
ENSG00000164919	COX6C	ENST00000518171;ENST00000524245;ENST00000520271;ENST00000520468;ENST00000517682;ENST00000522934;ENST00000522940;ENST00000297564;ENST00000523016;ENST00000520517;ENST00000606245	GO:0005515(protein binding);GO:0005739(mitochondrion);GO:0005743(mitochondrial inner membrane);GO:0005751(mitochondrial respiratory chain complex IV);GO:0006091(generation of precursor metabolites and energy);GO:0006119(oxidative phosphorylation);GO:0006123(mitochondrial electron transport, cytochrome c to oxygen);GO:0016020(membrane);GO:0016021(integral component of membrane);GO:0031966(mitochon…	00190(Oxidative phosphorylation);01100(Metabolic pathways);04260(Cardiac muscle contraction);04714(Thermogenesis);04932(Non-alcoholic fatty liver disease);05010(Alzheimer disease);05012(Parkinson disease);05014(Amyotrophic lateral sclerosis);05016(Huntington disease);05020(Prion disease);05022(Pathways of neurodegeneration - multiple diseases);05022(Pathways of neurodegeneration - multiple diseas…	cytochrome c oxidase subunit 6C [Source:HGNC Symbol;Acc:HGNC:2285]	protein_coding;nonsense_mediated_decay;retained_intron	87.4305	53.0089	70.7049	39.6389	110.359	184.015	0.000385925	0.00973582
ENSG00000135069	PSAT1	ENST00000376588;ENST00000347159	GO:0003824(catalytic activity);GO:0004648(O-phospho-L-serine:2-oxoglutarate aminotransferase activity);GO:0005515(protein binding);GO:0005737(cytoplasm);GO:0005829(cytosol);GO:0006564(L-serine biosynthetic process);GO:0008483(transaminase activity);GO:0008615(pyridoxine biosynthetic process);GO:0008652(cellular amino acid biosynthetic process);GO:0016740(transferase activity);GO:0030170(pyridoxal…	00260(Glycine, serine and threonine metabolism);00270(Cysteine and methionine metabolism);00750(Vitamin B6 metabolism);01100(Metabolic pathways);01200(Carbon metabolism);01230(Biosynthesis of amino acids);01240(Biosynthesis of cofactors);01240(Biosynthesis of cofactors)	phosphoserine aminotransferase 1 [Source:HGNC Symbol;Acc:HGNC:19129]	protein_coding	2.25462	2.21185	2.29139	0.462701	4.64046	8.23324	0.000408231	0.0102813
ENSG00000160886	LY6K	ENST00000292430;ENST00000522591;ENST00000519390	GO:0001669(acrosomal vesicle);GO:0005576(extracellular region);GO:0005737(cytoplasm);GO:0005886(plasma membrane);GO:0007339(binding of sperm to zona pellucida);GO:0016020(membrane);GO:0031225(anchored component of membrane);GO:0031410(cytoplasmic vesicle);GO:0045121(membrane raft);GO:0045121(membrane raft)	NA	lymphocyte antigen 6 family member K [Source:HGNC Symbol;Acc:HGNC:24225]	protein_coding;processed_transcript	0.196774	0.373128	0.342819	0.221228	0.0293767	0.0184131	0.000410839	0.0103296
ENSG00000196453	ZNF777	ENST00000247930	GO:0000978(RNA polymerase II cis-regulatory region sequence-specific DNA binding);GO:0000981(DNA-binding transcription factor activity, RNA polymerase II-specific);GO:0003677(DNA binding);GO:0005515(protein binding);GO:0005634(nucleus);GO:0006355(regulation of DNA-templated transcription);GO:0006357(regulation of transcription by RNA polymerase II);GO:0008285(negative regulation of cell populatio…	05168(Herpes simplex virus 1 infection)	zinc finger protein 777 [Source:HGNC Symbol;Acc:HGNC:22213]	protein_coding	12.2015	12.4574	9.22476	9.64903	5.11683	4.82123	0.000411738	0.0103348
ENSG00000206557	TRIM71	ENST00000383763	GO:0000082(G1/S transition of mitotic cell cycle);GO:0000209(protein polyubiquitination);GO:0000932(P-body);GO:0001843(neural tube closure);GO:0003723(RNA binding);GO:0004842(ubiquitin-protein transferase activity);GO:0005515(protein binding);GO:0005737(cytoplasm);GO:0008270(zinc ion binding);GO:0008543(fibroblast growth factor receptor signaling pathway);GO:0010586(miRNA metabolic process);GO:00…	05206(MicroRNAs in cancer)	tripartite motif containing 71 [Source:HGNC Symbol;Acc:HGNC:32669]	protein_coding	0.339568	0.37761	0.435793	0.606779	0.145343	0.088245	0.000413278	0.0103561
ENSG00000127586	CHTF18	ENST00000631357;ENST00000440239;ENST00000471202;ENST00000464728;ENST00000262315;ENST00000455171;ENST00000491530;ENST00000484349;ENST00000564940;ENST00000498439;ENST00000570058;ENST00000461268;ENST00000567620;ENST00000479976;ENST00000493715;ENST00000565787;ENST00000569270	GO:0000166(nucleotide binding);GO:0003677(DNA binding);GO:0003689(DNA clamp loader activity);GO:0005515(protein binding);GO:0005524(ATP binding);GO:0005634(nucleus);GO:0005654(nucleoplasm);GO:0005829(cytosol);GO:0006260(DNA replication);GO:0007049(cell cycle);GO:0016020(membrane);GO:0016887(ATP hydrolysis activity);GO:0017116(single-stranded DNA helicase activity);GO:0031390(Ctf18 RFC-like comple…	NA	chromosome transmission fidelity factor 18 [Source:HGNC Symbol;Acc:HGNC:18435]	protein_coding;nonsense_mediated_decay;retained_intron;processed_transcript	7.9729	8.27808	8.38901	9.01231	3.42947	4.05173	0.000414441	0.0103679
ENSG00000213445	SIPA1	ENST00000394224;ENST00000527525;ENST00000528699;ENST00000531339;ENST00000530226;ENST00000529725;ENST00000534406;ENST00000526137;ENST00000534313	GO:0002250(adaptive immune response);GO:0005096(GTPase activator activity);GO:0005515(protein binding);GO:0005634(nucleus);GO:0005737(cytoplasm);GO:0005829(cytosol);GO:0007010(cytoskeleton organization);GO:0007162(negative regulation of cell adhesion);GO:0007165(signal transduction);GO:0008022(protein C-terminus binding);GO:0012505(endomembrane system);GO:0016020(membrane);GO:0030133(transport ve…	04015(Rap1 signaling pathway);04670(Leukocyte transendothelial migration);04670(Leukocyte transendothelial migration)	signal-induced proliferation-associated 1 [Source:HGNC Symbol;Acc:HGNC:10885]	protein_coding;retained_intron	0.281475	0.218626	0.0722953	0.149608	0.520965	0.759167	0.000415294	0.010372
ENSG00000183718	TRIM52	ENST00000688015;ENST00000612671;ENST00000686030;ENST00000611618;ENST00000691252;ENST00000513146	GO:0003713(transcription coactivator activity);GO:0005634(nucleus);GO:0005737(cytoplasm);GO:0005829(cytosol);GO:0008270(zinc ion binding);GO:0016567(protein ubiquitination);GO:0016604(nuclear body);GO:0016740(transferase activity);GO:0043123(positive regulation of I-kappaB kinase/NF-kappaB signaling);GO:0045893(positive regulation of DNA-templated transcription);GO:0046872(metal ion binding);GO:0…	NA	tripartite motif containing 52 [Source:HGNC Symbol;Acc:HGNC:19024]	protein_coding;retained_intron;processed_transcript	0.916534	1.07043	1.57645	2.33431	2.72812	2.96932	0.000416591	0.010387
ENSG00000189334	S100A14	ENST00000368702;ENST00000368701;ENST00000476873;ENST00000344616;ENST00000469571	GO:0005509(calcium ion binding);GO:0005515(protein binding);GO:0005615(extracellular space);GO:0005737(cytoplasm);GO:0006915(apoptotic process);GO:0032496(response to lipopolysaccharide);GO:0034142(toll-like receptor 4 signaling pathway);GO:0042379(chemokine receptor binding);GO:0042742(defense response to bacterium);GO:0048306(calcium-dependent protein binding);GO:0048471(perinuclear region of c…	NA	S100 calcium binding protein A14 [Source:HGNC Symbol;Acc:HGNC:18901]	protein_coding;processed_transcript	96.5503	49.6362	89.2905	48.4329	129.481	228.173	0.000418192	0.0104096
ENSG00000133169	BEX1	ENST00000372728	GO:0005102(signaling receptor binding);GO:0005515(protein binding);GO:0005634(nucleus);GO:0005667(transcription regulator complex);GO:0005737(cytoplasm);GO:0007165(signal transduction);GO:0007399(nervous system development);GO:0030154(cell differentiation);GO:0045944(positive regulation of transcription by RNA polymerase II);GO:0051091(positive regulation of DNA-binding transcription factor activ…	NA	brain expressed X-linked 1 [Source:HGNC Symbol;Acc:HGNC:1036]	protein_coding	0.390553	0.240607	0.306545	0.339507	2.04126	1.93621	0.000420689	0.0104371
ENSG00000119922	IFIT2	ENST00000371826;ENST00000638108	GO:0002376(immune system process);GO:0003723(RNA binding);GO:0005515(protein binding);GO:0005737(cytoplasm);GO:0005783(endoplasmic reticulum);GO:0005829(cytosol);GO:0006915(apoptotic process);GO:0008637(apoptotic mitochondrial changes);GO:0009615(response to virus);GO:0032091(negative regulation of protein binding);GO:0035457(cellular response to interferon-alpha);GO:0043065(positive regulation o…	NA	interferon induced protein with tetratricopeptide repeats 2 [Source:HGNC Symbol;Acc:HGNC:5409]	protein_coding	0.339469	0.227831	0.620625	0.489538	0.0504305	0.0971776	0.000422223	0.0104579
ENSG00000271380	ENSG00000271380	ENST00000605085	NA	NA	novel transcript, antisense to SHC1 and PYGO2	lncRNA	2.28756	1.50556	1.43472	0.426741	0.10508	0.138097	0.00043131	0.0106653
ENSG00000226363	HAGLROS	ENST00000426615	NA	NA	HAGLR opposite strand lncRNA [Source:HGNC Symbol;Acc:HGNC:50646]	lncRNA	1.76002	1.13647	2.71878	1.23916	0.080841	0.32192	0.000435063	0.0107404
ENSG00000197594	ENPP1	ENST00000684147;ENST00000513998;ENST00000647893;ENST00000486853;ENST00000459624;ENST00000650147;ENST00000683687;ENST00000647981;ENST00000684674;ENST00000650507;ENST00000684536	GO:0003676(nucleic acid binding);GO:0004527(exonuclease activity);GO:0004528(phosphodiesterase I activity);GO:0004551(dinucleotide phosphatase activity);GO:0005044(scavenger receptor activity);GO:0005158(insulin receptor binding);GO:0005509(calcium ion binding);GO:0005515(protein binding);GO:0005524(ATP binding);GO:0005576(extracellular region);GO:0005615(extracellular space);GO:0005765(lysosomal…	00230(Purine metabolism);00240(Pyrimidine metabolism);00500(Starch and sucrose metabolism);00740(Riboflavin metabolism);00760(Nicotinate and nicotinamide metabolism);00770(Pantothenate and CoA biosynthesis);01100(Metabolic pathways);01100(Metabolic pathways)	ectonucleotide pyrophosphatase/phosphodiesterase 1 [Source:HGNC Symbol;Acc:HGNC:3356]	processed_transcript;nonsense_mediated_decay;protein_coding;retained_intron	4.4346	4.10308	7.79656	7.57853	10.7511	8.52716	0.000438603	0.0107745
ENSG00000057593	F7	ENST00000375581;ENST00000479674;ENST00000473085	GO:0001666(response to hypoxia);GO:0002690(positive regulation of leukocyte chemotaxis);GO:0004175(endopeptidase activity);GO:0004252(serine-type endopeptidase activity);GO:0005102(signaling receptor binding);GO:0005509(calcium ion binding);GO:0005515(protein binding);GO:0005576(extracellular region);GO:0005615(extracellular space);GO:0005788(endoplasmic reticulum lumen);GO:0005796(Golgi lumen);G…	04610(Complement and coagulation cascades);04610(Complement and coagulation cascades)	coagulation factor VII [Source:HGNC Symbol;Acc:HGNC:3544]	protein_coding;retained_intron;processed_transcript	0.28747	0.253994	0.813598	0.349864	0.050411	0.0866903	0.000437715	0.0107745
ENSG00000167741	GGT6	ENST00000301395;ENST00000573591;ENST00000381550;ENST00000574154	GO:0003674(molecular_function);GO:0005515(protein binding);GO:0006749(glutathione metabolic process);GO:0006750(glutathione biosynthetic process);GO:0008150(biological_process);GO:0016020(membrane);GO:0016021(integral component of membrane);GO:0016740(transferase activity);GO:0016746(acyltransferase activity);GO:0016787(hydrolase activity);GO:0036374(glutathione hydrolase activity);GO:0070062(ext…	00430(Taurine and hypotaurine metabolism);00480(Glutathione metabolism);01100(Metabolic pathways);01100(Metabolic pathways)	gamma-glutamyltransferase 6 [Source:HGNC Symbol;Acc:HGNC:26891]	protein_coding	0.434271	0.311195	0.135049	0.234098	0.014376	0.0292699	0.000438251	0.0107745
ENSG00000175832	ETV4	ENST00000393664;ENST00000319349;ENST00000591713;ENST00000545089;ENST00000545954;ENST00000585508;ENST00000587151;ENST00000590236;ENST00000586826	GO:0000785(chromatin);GO:0000978(RNA polymerase II cis-regulatory region sequence-specific DNA binding);GO:0000981(DNA-binding transcription factor activity, RNA polymerase II-specific);GO:0001228(DNA-binding transcription activator activity, RNA polymerase II-specific);GO:0003677(DNA binding);GO:0003700(DNA-binding transcription factor activity);GO:0005515(protein binding);GO:0005634(nucleus);GO…	05202(Transcriptional misregulation in cancer);05202(Transcriptional misregulation in cancer)	ETS variant transcription factor 4 [Source:HGNC Symbol;Acc:HGNC:3493]	protein_coding;retained_intron	1.1372	1.16093	1.15446	2.16405	0.412339	0.388624	0.000445253	0.01092
ENSG00000087495	PHACTR3	ENST00000492611;ENST00000473657;ENST00000371015	GO:0003779(actin binding);GO:0004864(protein phosphatase inhibitor activity);GO:0005515(protein binding);GO:0005634(nucleus);GO:0005654(nucleoplasm);GO:0008157(protein phosphatase 1 binding);GO:0016363(nuclear matrix);GO:0019888(protein phosphatase regulator activity);GO:0030036(actin cytoskeleton organization);GO:0043086(negative regulation of catalytic activity);GO:0050790(regulation of catalyt…	NA	phosphatase and actin regulator 3 [Source:HGNC Symbol;Acc:HGNC:15833]	protein_coding;retained_intron	0.87536	0.335414	0.225554	0.215283	0.0791635	0.126575	0.00044668	0.0109371
ENSG00000154930	ACSS1	ENST00000323482;ENST00000432802;ENST00000484396;ENST00000376726	GO:0000166(nucleotide binding);GO:0003987(acetate-CoA ligase activity);GO:0005515(protein binding);GO:0005524(ATP binding);GO:0005739(mitochondrion);GO:0005759(mitochondrial matrix);GO:0006069(ethanol oxidation);GO:0006085(acetyl-CoA biosynthetic process);GO:0006629(lipid metabolic process);GO:0016208(AMP binding);GO:0016405(CoA-ligase activity);GO:0016874(ligase activity);GO:0016878(acid-thiol l…	00010(Glycolysis / Gluconeogenesis);00620(Pyruvate metabolism);00630(Glyoxylate and dicarboxylate metabolism);00640(Propanoate metabolism);01100(Metabolic pathways);01200(Carbon metabolism);01200(Carbon metabolism)	acyl-CoA synthetase short chain family member 1 [Source:HGNC Symbol;Acc:HGNC:16091]	protein_coding;processed_transcript	3.27994	2.64649	3.50269	3.43217	1.38673	1.34614	0.000449738	0.0109761
ENSG00000123453	SARDH	ENST00000371872;ENST00000439388;ENST00000469828;ENST00000298628	GO:0005515(protein binding);GO:0005737(cytoplasm);GO:0005739(mitochondrion);GO:0005759(mitochondrial matrix);GO:0008150(biological_process);GO:0008480(sarcosine dehydrogenase activity);GO:0016491(oxidoreductase activity);GO:1901053(sarcosine catabolic process);GO:1901053(sarcosine catabolic process)	00260(Glycine, serine and threonine metabolism);01100(Metabolic pathways);01100(Metabolic pathways)	sarcosine dehydrogenase [Source:HGNC Symbol;Acc:HGNC:10536]	protein_coding;processed_transcript	0.600975	0.657395	0.682376	0.459673	0.112825	0.156675	0.000462122	0.01126
ENSG00000196557	CACNA1H	ENST00000564231;ENST00000348261;ENST00000562079;ENST00000639478;ENST00000565831;ENST00000564954;ENST00000569953;ENST00000638323;ENST00000569107;ENST00000358590;ENST00000637236	GO:0001518(voltage-gated sodium channel complex);GO:0005216(ion channel activity);GO:0005244(voltage-gated ion channel activity);GO:0005245(voltage-gated calcium channel activity);GO:0005248(voltage-gated sodium channel activity);GO:0005262(calcium channel activity);GO:0005515(protein binding);GO:0005886(plasma membrane);GO:0005887(integral component of plasma membrane);GO:0005891(voltage-gated c…	04010(MAPK signaling pathway);04020(Calcium signaling pathway);04713(Circadian entrainment);04925(Aldosterone synthesis and secretion);04927(Cortisol synthesis and secretion);04929(GnRH secretion);04934(Cushing syndrome);04934(Cushing syndrome)	calcium voltage-gated channel subunit alpha1 H [Source:HGNC Symbol;Acc:HGNC:1395]	protein_coding;nonsense_mediated_decay;retained_intron	7.76283	12.769	12.6653	20.1028	7.01572	3.80202	0.000471281	0.0114459
ENSG00000163132	MSX1	ENST00000382723	GO:0000122(negative regulation of transcription by RNA polymerase II);GO:0000785(chromatin);GO:0000902(cell morphogenesis);GO:0000977(RNA polymerase II transcription regulatory region sequence-specific DNA binding);GO:0000981(DNA-binding transcription factor activity, RNA polymerase II-specific);GO:0000987(cis-regulatory region sequence-specific DNA binding);GO:0001227(DNA-binding transcription r…	05166(Human T-cell leukemia virus 1 infection)	msh homeobox 1 [Source:HGNC Symbol;Acc:HGNC:7391]	protein_coding	1.20452	1.06969	0.921515	0.236523	0.0235196	0.14809	0.000480423	0.0116491
ENSG00000120708	TGFBI	ENST00000442011;ENST00000514242;ENST00000515433;ENST00000504411;ENST00000513497;ENST00000506699;ENST00000509485;ENST00000509749;ENST00000604555	GO:0001525(angiogenesis);GO:0002062(chondrocyte differentiation);GO:0005178(integrin binding);GO:0005201(extracellular matrix structural constituent);GO:0005515(protein binding);GO:0005518(collagen binding);GO:0005576(extracellular region);GO:0005604(basement membrane);GO:0005615(extracellular space);GO:0005802(trans-Golgi network);GO:0005886(plasma membrane);GO:0007155(cell adhesion);GO:0007162(…	NA	transforming growth factor beta induced [Source:HGNC Symbol;Acc:HGNC:11771]	protein_coding;retained_intron;nonsense_mediated_decay	3.57445	3.98769	3.66196	3.0638	1.03686	1.74303	0.000485911	0.0117631
ENSG00000283239	KBTBD11-OT1	ENST00000635855;ENST00000635773	GO:0016020(membrane);GO:0016021(integral component of membrane);GO:0016021(integral component of membrane)	NA	KBTBD11 overlapping transcript 1 [Source:NCBI gene (formerly Entrezgene);Acc:104266957]	nonsense_mediated_decay	0.446874	4.66603e-05	0	0.00145	0	1.80604	0.000506694	0.0121445
ENSG00000154162	CDH12	ENST00000382254	GO:0000902(cell morphogenesis);GO:0005509(calcium ion binding);GO:0005886(plasma membrane);GO:0005912(adherens junction);GO:0007043(cell-cell junction assembly);GO:0007155(cell adhesion);GO:0007156(homophilic cell adhesion via plasma membrane adhesion molecules);GO:0016020(membrane);GO:0016021(integral component of membrane);GO:0016339(calcium-dependent cell-cell adhesion via plasma membrane cell…	NA	cadherin 12 [Source:HGNC Symbol;Acc:HGNC:1751]	protein_coding	0.0624796	0.0488306	0.0182016	0.0233987	0.256834	0.192609	0.000507336	0.0121445
ENSG00000160255	ITGB2	ENST00000397850;ENST00000696946;ENST00000498666;ENST00000475170;ENST00000479202;ENST00000521995	GO:0001540(amyloid-beta binding);GO:0001774(microglial cell activation);GO:0001851(complement component C3b binding);GO:0002523(leukocyte migration involved in inflammatory response);GO:0005178(integrin binding);GO:0005515(protein binding);GO:0005886(plasma membrane);GO:0005925(focal adhesion);GO:0006898(receptor-mediated endocytosis);GO:0006909(phagocytosis);GO:0006911(phagocytosis, engulfment);…	04015(Rap1 signaling pathway);04145(Phagosome);04390(Hippo signaling pathway);04514(Cell adhesion molecules);04610(Complement and coagulation cascades);04650(Natural killer cell mediated cytotoxicity);04670(Leukocyte transendothelial migration);04810(Regulation of actin cytoskeleton);05133(Pertussis);05134(Legionellosis);05140(Leishmaniasis);05144(Malaria);05146(Amoebiasis);05150(Staphylococcus a…	integrin subunit beta 2 [Source:HGNC Symbol;Acc:HGNC:6155]	protein_coding;retained_intron	0.414613	0.344307	0.341262	0.304677	0.096973	0.0466422	0.000503082	0.0121445
ENSG00000232677	LINC00665	ENST00000658991;ENST00000666458;ENST00000591372;ENST00000651681;ENST00000438368;ENST00000658126;ENST00000665982;ENST00000661195;ENST00000449434;ENST00000691592;ENST00000590657;ENST00000674604;ENST00000427868;ENST00000702802;ENST00000689532;ENST00000666182;ENST00000659786;ENST00000668768;ENST00000658042;ENST00000585356;ENST00000675074	NA	NA	long intergenic non-protein coding RNA 665 [Source:HGNC Symbol;Acc:HGNC:44323]	lncRNA	1.12978	1.19488	0.934614	1.10751	0.378172	0.437841	0.000503542	0.0121445
ENSG00000064042	LIMCH1	ENST00000512820;ENST00000313860;ENST00000503057;ENST00000508501;ENST00000512228;ENST00000513024;ENST00000515785;ENST00000381753;ENST00000396595;ENST00000512632;ENST00000512946	GO:0001725(stress fiber);GO:0001934(positive regulation of protein phosphorylation);GO:0003779(actin binding);GO:0005515(protein binding);GO:0005737(cytoplasm);GO:0005856(cytoskeleton);GO:0016460(myosin II complex);GO:0030336(negative regulation of cell migration);GO:0031032(actomyosin structure organization);GO:0032034(myosin II head/neck binding);GO:0046872(metal ion binding);GO:0051496(positiv…	NA	LIM and calponin homology domains 1 [Source:HGNC Symbol;Acc:HGNC:29191]	protein_coding;processed_transcript	0.936413	1.23278	1.17885	1.04338	0.408146	0.383758	0.000506681	0.0121445
ENSG00000123159	GIPC1	ENST00000393033;ENST00000591349;ENST00000587811;ENST00000586027;ENST00000393028;ENST00000587969;ENST00000589497;ENST00000591245;ENST00000587934;ENST00000585606	GO:0003779(actin binding);GO:0005102(signaling receptor binding);GO:0005515(protein binding);GO:0005737(cytoplasm);GO:0005829(cytosol);GO:0005938(cell cortex);GO:0006605(protein targeting);GO:0007186(G protein-coupled receptor signaling pathway);GO:0007268(chemical synaptic transmission);GO:0008021(synaptic vesicle);GO:0012506(vesicle membrane);GO:0014047(glutamate secretion);GO:0016020(membrane)…	NA	GIPC PDZ domain containing family member 1 [Source:HGNC Symbol;Acc:HGNC:1226]	protein_coding;retained_intron;nonsense_mediated_decay	80.3124	63.0513	56.8713	43.7426	29.0967	29.7208	0.000507175	0.0121445
ENSG00000105825	TFPI2	ENST00000222543;ENST00000650573;ENST00000451238;ENST00000647793;ENST00000461482	GO:0004867(serine-type endopeptidase inhibitor activity);GO:0005201(extracellular matrix structural constituent);GO:0005576(extracellular region);GO:0005615(extracellular space);GO:0007596(blood coagulation);GO:0007599(hemostasis);GO:0010466(negative regulation of peptidase activity);GO:0010951(negative regulation of endopeptidase activity);GO:0030414(peptidase inhibitor activity);GO:0031012(extr…	NA	tissue factor pathway inhibitor 2 [Source:HGNC Symbol;Acc:HGNC:11761]	protein_coding;retained_intron	12.4346	9.65782	16.1942	9.53505	3.79694	5.30204	0.000507189	0.0121445
ENSG00000212994	RPS26P6	ENST00000475156	NA	NA	ribosomal protein S26 pseudogene 6 [Source:HGNC Symbol;Acc:HGNC:31090]	processed_pseudogene	30.7359	15.4868	9.65232	11.5219	7.23538	3.43345	0.000512713	0.0122536
ENSG00000104447	TRPS1	ENST00000640765;ENST00000520276;ENST00000220888;ENST00000395715;ENST00000451156;ENST00000519815;ENST00000519674;ENST00000395713;ENST00000422939	GO:0000122(negative regulation of transcription by RNA polymerase II);GO:0000785(chromatin);GO:0000977(RNA polymerase II transcription regulatory region sequence-specific DNA binding);GO:0001227(DNA-binding transcription repressor activity, RNA polymerase II-specific);GO:0001501(skeletal system development);GO:0003677(DNA binding);GO:0003700(DNA-binding transcription factor activity);GO:0005515(p…	NA	transcriptional repressor GATA binding 1 [Source:HGNC Symbol;Acc:HGNC:12340]	protein_coding	5.85302	8.39168	12.4358	22.4673	23.9469	13.9492	0.000515643	0.012304
ENSG00000111057	KRT18	ENST00000388835;ENST00000550600;ENST00000388837;ENST00000549078;ENST00000548496;ENST00000546656;ENST00000548015	GO:0003723(RNA binding);GO:0005198(structural molecule activity);GO:0005515(protein binding);GO:0005634(nucleus);GO:0005730(nucleolus);GO:0005737(cytoplasm);GO:0005815(microtubule organizing center);GO:0005829(cytosol);GO:0005856(cytoskeleton);GO:0005882(intermediate filament);GO:0005912(adherens junction);GO:0007049(cell cycle);GO:0009653(anatomical structure morphogenesis);GO:0033209(tumor necr…	04915(Estrogen signaling pathway);05150(Staphylococcus aureus infection);05150(Staphylococcus aureus infection)	keratin 18 [Source:HGNC Symbol;Acc:HGNC:6430]	protein_coding;retained_intron	2211.22	1607.54	1234.7	1099.26	963.496	990.4	0.000522256	0.0124222
ENSG00000160813	PPP1R35	ENST00000491407;ENST00000292330;ENST00000487452;ENST00000476185;ENST00000470295	GO:0004864(protein phosphatase inhibitor activity);GO:0005515(protein binding);GO:0005737(cytoplasm);GO:0005813(centrosome);GO:0005814(centriole);GO:0005815(microtubule organizing center);GO:0005856(cytoskeleton);GO:0010923(negative regulation of phosphatase activity);GO:0019902(phosphatase binding);GO:0045724(positive regulation of cilium assembly);GO:0048570(notochord morphogenesis);GO:1903724(…	NA	protein phosphatase 1 regulatory subunit 35 [Source:HGNC Symbol;Acc:HGNC:28320]	retained_intron;protein_coding;processed_transcript	20.9616	12.516	20.0485	8.24024	3.68022	5.28815	0.000524687	0.0124603
ENSG00000082458	DLG3	ENST00000374355;ENST00000542398;ENST00000461646;ENST00000194900;ENST00000496931;ENST00000494493;ENST00000489733	GO:0001736(establishment of planar polarity);GO:0005515(protein binding);GO:0005615(extracellular space);GO:0005737(cytoplasm);GO:0005829(cytosol);GO:0005886(plasma membrane);GO:0005911(cell-cell junction);GO:0005912(adherens junction);GO:0005923(bicellular tight junction);GO:0008285(negative regulation of cell population proliferation);GO:0016323(basolateral plasma membrane);GO:0019900(kinase bi…	04390(Hippo signaling pathway);04530(Tight junction);05165(Human papillomavirus infection);05165(Human papillomavirus infection)	discs large MAGUK scaffold protein 3 [Source:HGNC Symbol;Acc:HGNC:2902]	protein_coding;processed_transcript;retained_intron	4.47905	4.12129	3.87081	3.89497	8.43865	7.45495	0.00052701	0.0124759
ENSG00000197044	ZNF441	ENST00000357901	GO:0000977(RNA polymerase II transcription regulatory region sequence-specific DNA binding);GO:0000981(DNA-binding transcription factor activity, RNA polymerase II-specific);GO:0003677(DNA binding);GO:0005515(protein binding);GO:0005634(nucleus);GO:0006355(regulation of DNA-templated transcription);GO:0006357(regulation of transcription by RNA polymerase II);GO:0046872(metal ion binding)	05168(Herpes simplex virus 1 infection)	zinc finger protein 441 [Source:HGNC Symbol;Acc:HGNC:20875]	protein_coding	0.325058	0.293169	0.465651	0.722899	0.0945228	0.112744	0.00052978	0.0125217
ENSG00000114166	KAT2B	ENST00000263754;ENST00000468400;ENST00000468111	GO:0000123(histone acetyltransferase complex);GO:0000124(SAGA complex);GO:0000776(kinetochore);GO:0000977(RNA polymerase II transcription regulatory region sequence-specific DNA binding);GO:0003682(chromatin binding);GO:0003712(transcription coregulator activity);GO:0003713(transcription coactivator activity);GO:0004145(diamine N-acetyltransferase activity);GO:0004402(histone acetyltransferase ac…	04330(Notch signaling pathway);04919(Thyroid hormone signaling pathway);05166(Human T-cell leukemia virus 1 infection);05203(Viral carcinogenesis);05203(Viral carcinogenesis)	lysine acetyltransferase 2B [Source:HGNC Symbol;Acc:HGNC:8638]	protein_coding;retained_intron	1.40291	1.86988	2.1218	1.47266	4.25225	3.77789	0.000531082	0.0125327
ENSG00000196154	S100A4	ENST00000368716;ENST00000354332;ENST00000368715;ENST00000468373;ENST00000481009	GO:0001837(epithelial to mesenchymal transition);GO:0003723(RNA binding);GO:0003779(actin binding);GO:0005509(calcium ion binding);GO:0005515(protein binding);GO:0005576(extracellular region);GO:0005615(extracellular space);GO:0005634(nucleus);GO:0005737(cytoplasm);GO:0042802(identical protein binding);GO:0043005(neuron projection);GO:0043123(positive regulation of I-kappaB kinase/NF-kappaB signa…	NA	S100 calcium binding protein A4 [Source:HGNC Symbol;Acc:HGNC:10494]	protein_coding;processed_transcript	1.13786	1.73184	3.41425	2.99319	0.730131	0.231508	0.000537517	0.0126646
ENSG00000117525	F3	ENST00000334047;ENST00000480356;ENST00000478217	GO:0001938(positive regulation of endothelial cell proliferation);GO:0002020(protease binding);GO:0002541(activation of plasma proteins involved in acute inflammatory response);GO:0002543(activation of blood coagulation via clotting cascade);GO:0004252(serine-type endopeptidase activity);GO:0004896(cytokine receptor activity);GO:0005515(protein binding);GO:0005543(phospholipid binding);GO:0005576…	04610(Complement and coagulation cascades);04933(AGE-RAGE signaling pathway in diabetic complications);04933(AGE-RAGE signaling pathway in diabetic complications)	coagulation factor III, tissue factor [Source:HGNC Symbol;Acc:HGNC:3541]	protein_coding;processed_transcript	2.04712	2.67917	0.997946	1.02353	0.636592	0.754725	0.000541626	0.0127414
ENSG00000172889	EGFL7	ENST00000371698;ENST00000492002;ENST00000371699	GO:0001525(angiogenesis);GO:0001568(blood vessel development);GO:0001570(vasculogenesis);GO:0001938(positive regulation of endothelial cell proliferation);GO:0005102(signaling receptor binding);GO:0005509(calcium ion binding);GO:0005515(protein binding);GO:0005576(extracellular region);GO:0005615(extracellular space);GO:0007155(cell adhesion);GO:0009986(cell surface);GO:0030154(cell differentiati…	NA	EGF like domain multiple 7 [Source:HGNC Symbol;Acc:HGNC:20594]	protein_coding;processed_transcript	41.9971	25.8697	33.6403	18.4207	8.69368	13.9198	0.000543277	0.0127602
ENSG00000161677	JOSD2	ENST00000598418;ENST00000595669;ENST00000594350;ENST00000601423;ENST00000595718;ENST00000602146	GO:0004843(cysteine-type deubiquitinase activity);GO:0005515(protein binding);GO:0005737(cytoplasm);GO:0005829(cytosol);GO:0006508(proteolysis);GO:0008233(peptidase activity);GO:0016579(protein deubiquitination);GO:0016787(hydrolase activity);GO:0016787(hydrolase activity)	NA	Josephin domain containing 2 [Source:HGNC Symbol;Acc:HGNC:28853]	protein_coding;retained_intron	17.9576	10.3614	13.5795	6.35328	4.23931	3.65299	0.000548625	0.0128657
ENSG00000183018	SPNS2	ENST00000329078;ENST00000576635;ENST00000573990;ENST00000571668;ENST00000570979;ENST00000570641	GO:0001782(B cell homeostasis);GO:0002260(lymphocyte homeostasis);GO:0002920(regulation of humoral immune response);GO:0003376(sphingosine-1-phosphate receptor signaling pathway);GO:0005768(endosome);GO:0005886(plasma membrane);GO:0006665(sphingolipid metabolic process);GO:0006869(lipid transport);GO:0007605(sensory perception of sound);GO:0010008(endosome membrane);GO:0016020(membrane);GO:001602…	NA	sphingolipid transporter 2 [Source:HGNC Symbol;Acc:HGNC:26992]	protein_coding;retained_intron	2.13031	1.73239	0.671741	0.778589	0.583612	0.708176	0.000555777	0.013013
ENSG00000119917	IFIT3	ENST00000371818;ENST00000371811;ENST00000679781	GO:0002376(immune system process);GO:0003674(molecular_function);GO:0003723(RNA binding);GO:0005515(protein binding);GO:0005737(cytoplasm);GO:0005739(mitochondrion);GO:0005829(cytosol);GO:0008285(negative regulation of cell population proliferation);GO:0009615(response to virus);GO:0035457(cellular response to interferon-alpha);GO:0042802(identical protein binding);GO:0043066(negative regulation …	NA	interferon induced protein with tetratricopeptide repeats 3 [Source:HGNC Symbol;Acc:HGNC:5411]	protein_coding	0.203	0.257363	0.589904	0.367692	0.0735012	0.0705391	0.000560413	0.0131011
ENSG00000074695	LMAN1	ENST00000251047;ENST00000592562;ENST00000587561;ENST00000587918	GO:0000139(Golgi membrane);GO:0005515(protein binding);GO:0005537(mannose binding);GO:0005783(endoplasmic reticulum);GO:0005789(endoplasmic reticulum membrane);GO:0005793(endoplasmic reticulum-Golgi intermediate compartment);GO:0005794(Golgi apparatus);GO:0006457(protein folding);GO:0006888(endoplasmic reticulum to Golgi vesicle-mediated transport);GO:0007029(endoplasmic reticulum organization);G…	04141(Protein processing in endoplasmic reticulum);04141(Protein processing in endoplasmic reticulum)	lectin, mannose binding 1 [Source:HGNC Symbol;Acc:HGNC:6631]	protein_coding;retained_intron	6.26738	8.65777	7.70255	8.59864	16.5311	14.3207	0.000576191	0.0134337
ENSG00000256500	ENSG00000256500	ENST00000472726	GO:0005515(protein binding);GO:0005737(cytoplasm);GO:0005739(mitochondrion);GO:0005743(mitochondrial inner membrane);GO:0005856(cytoskeleton);GO:0005871(kinesin complex);GO:0005874(microtubule);GO:0016020(membrane);GO:0097193(intrinsic apoptotic signaling pathway)	NA	novel protein	protein_coding	0	1.42468	7.44192	8.17827	18.8909	21.0092	0.000576435	0.0134337
ENSG00000139289	PHLDA1	ENST00000266671;ENST00000602540;ENST00000619060	GO:0005515(protein binding);GO:0005634(nucleus);GO:0005654(nucleoplasm);GO:0005730(nucleolus);GO:0005737(cytoplasm);GO:0005829(cytosol);GO:0006915(apoptotic process);GO:0031410(cytoplasmic vesicle);GO:0043065(positive regulation of apoptotic process);GO:0045210(FasL biosynthetic process);GO:1901981(phosphatidylinositol phosphate binding);GO:1901981(phosphatidylinositol phosphate binding)	NA	pleckstrin homology like domain family A member 1 [Source:HGNC Symbol;Acc:HGNC:8933]	protein_coding	3.65409	3.76235	2.1403	2.2453	5.39599	5.14396	0.000587502	0.0136704
ENSG00000100106	TRIOBP	ENST00000403663;ENST00000644935;ENST00000407319;ENST00000418339;ENST00000331103;ENST00000413051	GO:0003779(actin binding);GO:0005634(nucleus);GO:0005737(cytoplasm);GO:0005815(microtubule organizing center);GO:0005856(cytoskeleton);GO:0005925(focal adhesion);GO:0007015(actin filament organization);GO:0007049(cell cycle);GO:0007605(sensory perception of sound);GO:0015629(actin cytoskeleton);GO:0030047(actin modification);GO:0030496(midbody);GO:0031267(small GTPase binding);GO:0031625(ubiquiti…	NA	TRIO and F-actin binding protein [Source:HGNC Symbol;Acc:HGNC:17009]	protein_coding;retained_intron;nonsense_mediated_decay	2.76993	2.91083	2.80014	2.72329	1.37795	1.08341	0.000589727	0.0137009
ENSG00000179348	GATA2	ENST00000696466;ENST00000489987;ENST00000487848;ENST00000430265	GO:0000122(negative regulation of transcription by RNA polymerase II);GO:0000978(RNA polymerase II cis-regulatory region sequence-specific DNA binding);GO:0000981(DNA-binding transcription factor activity, RNA polymerase II-specific);GO:0001221(transcription coregulator binding);GO:0001223(transcription coactivator binding);GO:0001228(DNA-binding transcription activator activity, RNA polymerase I…	NA	GATA binding protein 2 [Source:HGNC Symbol;Acc:HGNC:4171]	protein_coding;retained_intron	2.84031	3.2752	1.41188	1.75566	4.31499	4.02513	0.000600433	0.0139065
ENSG00000175928	LRRN1	ENST00000319331;ENST00000496115	GO:0005515(protein binding);GO:0005615(extracellular space);GO:0016020(membrane);GO:0016021(integral component of membrane);GO:0031012(extracellular matrix);GO:0051965(positive regulation of synapse assembly);GO:0051965(positive regulation of synapse assembly)	NA	leucine rich repeat neuronal 1 [Source:HGNC Symbol;Acc:HGNC:20980]	protein_coding;processed_transcript	0.324577	0.495936	0.876214	0.907317	0.281573	0.153578	0.000604802	0.013986
ENSG00000012174	MBTPS2	ENST00000379484;ENST00000365779	GO:0000139(Golgi membrane);GO:0004222(metalloendopeptidase activity);GO:0005515(protein binding);GO:0005737(cytoplasm);GO:0006508(proteolysis);GO:0006629(lipid metabolic process);GO:0008202(steroid metabolic process);GO:0008203(cholesterol metabolic process);GO:0008233(peptidase activity);GO:0008237(metallopeptidase activity);GO:0016020(membrane);GO:0016021(integral component of membrane);GO:0016…	04141(Protein processing in endoplasmic reticulum);04141(Protein processing in endoplasmic reticulum)	membrane bound transcription factor peptidase, site 2 [Source:HGNC Symbol;Acc:HGNC:15455]	protein_coding	1.5103	2.10929	2.21695	2.1552	4.63585	3.65963	0.000611402	0.0141169
ENSG00000286237	ARMCX5-GPRASP2	ENST00000652409	NA	NA	ARMCX5-GPRASP2 readthrough [Source:NCBI gene (formerly Entrezgene);Acc:100528062]	protein_coding	0.462332	0.865955	0.36115	0.119295	1.11575	1.17974	0.000615205	0.0141828
ENSG00000187498	COL4A1	ENST00000375820;ENST00000648695;ENST00000467182;ENST00000474391;ENST00000650138;ENST00000648170	GO:0001525(angiogenesis);GO:0001569(branching involved in blood vessel morphogenesis);GO:0005201(extracellular matrix structural constituent);GO:0005515(protein binding);GO:0005576(extracellular region);GO:0005581(collagen trimer);GO:0005587(collagen type IV trimer);GO:0005604(basement membrane);GO:0005615(extracellular space);GO:0005788(endoplasmic reticulum lumen);GO:0007420(brain development);…	04151(PI3K-Akt signaling pathway);04510(Focal adhesion);04512(ECM-receptor interaction);04926(Relaxin signaling pathway);04933(AGE-RAGE signaling pathway in diabetic complications);04974(Protein digestion and absorption);05146(Amoebiasis);05165(Human papillomavirus infection);05200(Pathways in cancer);05222(Small cell lung cancer);05222(Small cell lung cancer)	collagen type IV alpha 1 chain [Source:HGNC Symbol;Acc:HGNC:2202]	protein_coding;retained_intron	0.226883	0.23938	0.191216	0.0379068	0.0354218	0.0242398	0.000619129	0.0142361
ENSG00000116329	OPRD1	ENST00000234961	GO:0004930(G protein-coupled receptor activity);GO:0004985(G protein-coupled opioid receptor activity);GO:0005515(protein binding);GO:0005737(cytoplasm);GO:0005886(plasma membrane);GO:0005887(integral component of plasma membrane);GO:0006955(immune response);GO:0007165(signal transduction);GO:0007186(G protein-coupled receptor signaling pathway);GO:0007187(G protein-coupled receptor signaling pat…	04022(cGMP-PKG signaling pathway);04071(Sphingolipid signaling pathway);04080(Neuroactive ligand-receptor interaction)	opioid receptor delta 1 [Source:HGNC Symbol;Acc:HGNC:8153]	protein_coding	0.331445	0.20068	0.093765	0.117325	0.052167	0.017615	0.000619414	0.0142361
ENSG00000029559	IBSP	ENST00000226284	GO:0001503(ossification);GO:0001649(osteoblast differentiation);GO:0003674(molecular_function);GO:0005178(integrin binding);GO:0005515(protein binding);GO:0005576(extracellular region);GO:0005615(extracellular space);GO:0007155(cell adhesion);GO:0016020(membrane);GO:0030198(extracellular matrix organization);GO:0030282(bone mineralization);GO:0031214(biomineral tissue development);GO:0031982(vesi…	04151(PI3K-Akt signaling pathway);04510(Focal adhesion);04512(ECM-receptor interaction);05165(Human papillomavirus infection)	integrin binding sialoprotein [Source:HGNC Symbol;Acc:HGNC:5341]	protein_coding	0.526325	0.384139	1.3412	1.64526	0.308879	0.175057	0.000621863	0.0142705
ENSG00000289614	ENSG00000289614	ENST00000684813	NA	NA	novel transcript	lncRNA	1.4777	0.877452	1.46156	1.3678	0.095782	0.145829	0.000628507	0.0144009
ENSG00000119541	VPS4B	ENST00000238497;ENST00000589604;ENST00000591475;ENST00000591383;ENST00000591519	GO:0000166(nucleotide binding);GO:0000922(spindle pole);GO:0001778(plasma membrane repair);GO:0005515(protein binding);GO:0005524(ATP binding);GO:0005634(nucleus);GO:0005643(nuclear pore);GO:0005737(cytoplasm);GO:0005768(endosome);GO:0005813(centrosome);GO:0005829(cytosol);GO:0005886(plasma membrane);GO:0006813(potassium ion transport);GO:0006914(autophagy);GO:0006996(organelle organization);GO:0…	04144(Endocytosis);04217(Necroptosis);04217(Necroptosis)	vacuolar protein sorting 4 homolog B [Source:HGNC Symbol;Acc:HGNC:10895]	protein_coding;retained_intron;processed_transcript	4.36031	6.17341	6.15202	6.55827	13.5462	10.1734	0.000633619	0.0144737
ENSG00000259803	SLC22A31	ENST00000562855;ENST00000563595;ENST00000568161;ENST00000682282;ENST00000614943;ENST00000603735;ENST00000562916	GO:0006811(ion transport);GO:0016020(membrane);GO:0016021(integral component of membrane);GO:0022857(transmembrane transporter activity);GO:0055085(transmembrane transport);GO:0055085(transmembrane transport)	NA	solute carrier family 22 member 31 [Source:HGNC Symbol;Acc:HGNC:27091]	protein_coding;retained_intron	2.90929	2.03192	2.34844	1.49292	0.0990569	0.659953	0.000633332	0.0144737
[truncated: 266 more rows]
